# Supplementary material for: A direct method to access various functional arylalkoxysilanes by Rh-catalysed intermolecular C–H silylation of alkoxysilanes
Source: Royal Society of Chemistry journal article supplement (doi:10.1039/d2sc03727k), 2022-01-01
Supplement: d2sc03727k1.pdf [file d2sc03727k1.pdf]

**Direct Method to Access Various Functional  
Arylalkoxysilanes by Rh-catalysed Intermolecular C–H  
Silylation of Alkoxysilane**

TBA\*

## Supporting Information

### Table of Contents

|                                                                                      |      |
|--------------------------------------------------------------------------------------|------|
| 1. <b>General</b> .....                                                              | S2   |
| 1.1 Reagents.....                                                                    | S3   |
| 2. <b>Synthesis and Characterization of C–H Silylation Products</b> .....            | S3   |
| 2.1 Optimization of reaction conditions.....                                         | S3   |
| 2.2 Redistribution Reactions in Control Experiment .....                             | S5   |
| 2.3 Synthesis of $[\text{RhCl}(\text{Ph-BPE})]_2$ .....                              | S6   |
| 2.4 Representative procedure for Rh-catalyzed C–H silylation of arenes.....          | S7   |
| 2.5 Representative procedure for Rh-catalyzed Double C–H silylation .....            | S14  |
| 3. <b>Synthesis and Characterization of Piers-Rubinsztajn products</b> .....         | S15  |
| 3.1 Representative procedure for Piers-Rubinsztajn reaction.....                     | S16  |
| 4. <b>Mechanistic Studies</b> .....                                                  | S19  |
| 4.1 Synthesis of $[\text{RhCl}(\text{Ph-BPE})]_2$ crystals.....                      | S19  |
| 4.2 Synthesis of $[\text{Rh}_2(\text{Ph-BPE})_2(\mu\text{-Cl})(\mu\text{-H})]$ ..... | S20  |
| 4.3 Synthesis of $[(\text{Ph-BPE})\text{Rh}(\mu\text{-H})]_2$ .....                  | S20  |
| 4.4 Identifying resting state of the catalyst.....                                   | S21  |
| 4.5 Determination of Reaction Order in [Furan], [HSi] and [Cat] .....                | S22  |
| 5. <b>NMR Spectra</b> .....                                                          | S25  |
| 5.1 C–H Silylation Products.....                                                     | S25  |
| 5.2 Double C–H Silylation Products.....                                              | S52  |
| 5.3 Siloxane Products.....                                                           | S54  |
| 5.4 Rh complexes.....                                                                | S64  |
| 6. <b>Crystallographic Analyses</b> .....                                            | S67  |
| 6.1 $[\text{RhCl}(\text{Ph-BPE})]_2$ .....                                           | S67  |
| 6.2 $[\text{Rh}_2(\text{Ph-BPE})_2(\mu\text{-Cl})(\mu\text{-H})]$ .....              | S95  |
| 6.3 $[(\text{Ph-BPE})\text{Rh}(\mu\text{-H})]_2$ .....                               | S119 |
| 7. <b>References</b> .....                                                           | S137 |

## 1. General:

<sup>1</sup>H NMR spectra were recorded on a Bruker Advance II HD 400 (400 MHz) spectrometer and Varian Unity INOVA 400 (400 MHz) spectrometer. Chemical shifts are reported in ppm with the solvent resonance as the internal standard (CDCl<sub>3</sub>: 7.26 ppm). Data are reported as follows: chemical shift, integration, multiplicity (s = singlet, d = doublet, t = triplet, q = quartet, p = pentet, sext = sextet, hept = heptet, m = multiplet, br = broad), and coupling constants (*J*, Hz). <sup>13</sup>C NMR spectra were recorded on a Bruker Advance III HD 400 (100 MHz) and Varian Unity INOVA 400 (100 MHz) spectrometer with complete proton decoupling. Chemical shifts are reported in ppm with the solvent resonance as the internal standard (CDCl<sub>3</sub>: 77.16 ppm). <sup>19</sup>F NMR spectra were recorded on a Bruker Advance III HD 400 (376 MHz) spectrometer without proton decoupling. High-resolution mass spectrometry was performed on GC-MS systems consisting of an HP 6890 GC with a HP 5973 MSD and an Thermo 1300 Trace GC with a Q-Exactive Orbitrap MS.

Unless otherwise noted, all reactions were carried out with distilled and degassed solvents under an atmosphere of dry N<sub>2</sub> in oven- (135 °C) or flame-dried glassware with standard dry box or vacuum-line techniques. All air and moisture-sensitive experiments, work-up, and purification procedures were carried out in a N<sub>2</sub>-filled glove box. Solvents were purified under a positive pressure of dry argon by a two-column solid-state purification system (JC Meyer Solvent System, Irvine, CA) and stored over activated 4 Å molecular sieves. CDCl<sub>3</sub> (Aldrich) was distilled and stored over activated 4 Å molecular sieves prior to use. 25mm 0.2 µm PTFE Syringe filters from VWR were used in workup procedures.

### 1.1 Reagents:

Rh catalysts and phosphine ligands were purchased from Strem and used as received.

5-Methoxybenzofuran (Aldrich), Thianaphene (Aldrich), Alumina Oxide (Alfa Aesar), Tris(pentafluorophenyl)borane (Strem), and Lithium triethylborohydride in THF (Aldrich) were used as received.

Benzene (Aldrich), Dimethylethoxysilane (Gelest), Methyl-diethoxysilane (Gelest), 1,3-Bis(trifluoromethyl)benzene (Oakwood), 1,3-Benzodioxole (Oakwood), Anisole (Aldrich), Fluorobenzene (Oakwood), Chlorobenzene (Oakwood), 1,2-Dichlorobenzene (Oakwood), 1,2-Difluorobenzene (Aldrich), 1,3,5-Trifluorobenzene (Aldrich), 1,2,4,5-Tetrafluorobenzene

(Aldrich), 1-Methylpyrrole (Oakwood), Furan (Aldrich), Thiophene (Aldrich), Cumene (Aldrich), *N*-Boc-pyrrole (Aldrich), 1-Methylindole (Oakwood), Benzofuran (Oakwood), Methyl benzoate (Aldrich), Benzotrifluoride (Aldrich), Cumene (Aldrich), 2-Methylfuran (Aldrich), Methyl thiophene-2-carboxylate (Synthonix), Phenyltrimethoxysilane (Gelest), and Pentamethyl-disiloxane (Gelest) were distilled prior to use.

## 2. Synthesis and Characterization of C—H Silylation Products

### 2.1 Optimization of reaction conditions:

**Table S1.** Ligand screening<sup>a</sup>

| 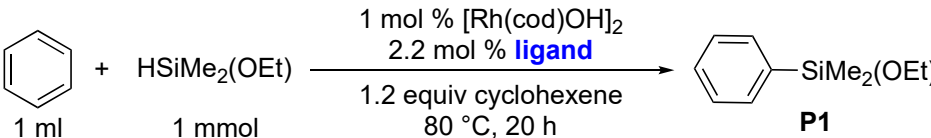 |                                               |                                     |      |       |
|------------------------------------------------------------------------------------|-----------------------------------------------|-------------------------------------|------|-------|
| entry                                                                              | [Rh]                                          | ligand                              | conv | yield |
| 1                                                                                  | [Rh(cod)OH] <sub>2</sub>                      | ( <i>S,S</i> )-Et-DuPhos            | 70%  | 7%    |
| 2                                                                                  | [Rh(cod)OH] <sub>2</sub>                      | ( <i>S,S</i> )- <i>i</i> -Pr-DuPhos | 71%  | 5%    |
| 3                                                                                  | [Rh (Me-DuPhos)cod]BF <sub>4</sub>            |                                     | 61%  | <2%   |
| 4                                                                                  | [Rh (Et-DuPhos)cod]BF <sub>4</sub>            |                                     | 66%  | <2%   |
| 5                                                                                  | [Rh ( <i>i</i> -Pr-DuPhos)cod]BF <sub>4</sub> |                                     | 56%  | 9%    |
| 6                                                                                  | [Rh(cod)OH] <sub>2</sub>                      | ( <i>S,S</i> )- <i>i</i> -Pr-BPE    | 39%  | 12%   |
| 7                                                                                  | [Rh ( <i>i</i> -Pr-BPE)cod]BF <sub>4</sub>    |                                     | 68%  | 28%   |
| 8                                                                                  | [Rh(cod)OH] <sub>2</sub>                      | ( <i>S,S</i> )-Ph-BPE               | 88%  | 56%   |
| 9 <sup>b</sup>                                                                     | [Rh(cod)OH] <sub>2</sub>                      | ( <i>S,S</i> )-Ph-BPE               | >98% | 79%   |

<sup>a</sup> All reactions were performed under N<sub>2</sub>. Yields were determined by <sup>1</sup>H NMR analysis.

<sup>b</sup> at 100 °C.

**Table S2.** Additive screening<sup>a</sup>

| entry | alkene                         | conv | yield | entry | alkene | conv | yield          |
|-------|--------------------------------|------|-------|-------|--------|------|----------------|
| 1     | C <sub>6</sub> H <sub>13</sub> | >98% | 6%    | 6     |        | >98% | 66%            |
| 2     | <i>t</i> -Bu                   | >98% | 46%   | 7     |        | >98% | 84% \$7-28/mol |
| 3     | Me-CH=CH-Ph                    | 94%  | 51%   | 8     |        | >98% | 79%            |
| 4     | Me-CH=CH-CN                    | 63%  | <2%   | 9     |        | >98% | 93% \$267/mol  |
| 5     |                                | 77%  | 11%   | 10    |        | >98% | 69%            |

<sup>a</sup> All reactions were performed under N<sub>2</sub>. Yields were determined by <sup>1</sup>H NMR analysis.

**Table S3.** Ligand loading<sup>a</sup>

|                |                   |
|----------------|-------------------|
| 1 mol % Ph-BPE | 82% conv, 9% P1   |
| 2 mol % Ph-BPE | >98% conv, 81% P1 |
| 3 mol % Ph-BPE | >98% conv, 85% P1 |
| 4 mol % Ph-BPE | 55% conv, 20% P1  |

<sup>a</sup> All reactions were performed under N<sub>2</sub>. Yields were determined by <sup>1</sup>H NMR analysis.

**Table S4.** Screening of reaction temperature<sup>a</sup>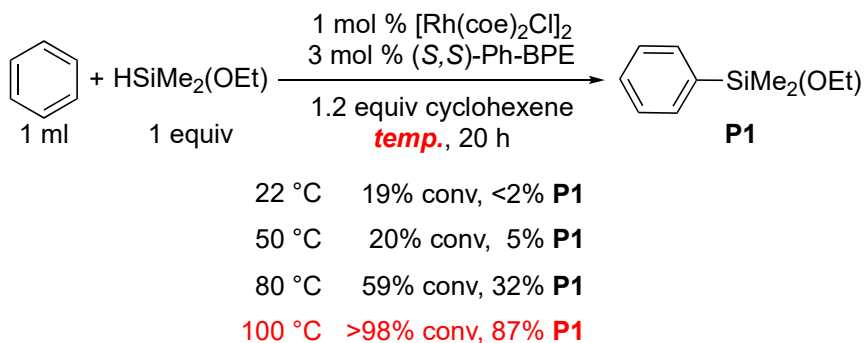

<sup>a</sup> All reactions were performed under N<sub>2</sub>. Yields were determined by <sup>1</sup>H NMR analysis.

## 2.2 Redistribution Reactions in Control Experiment:

**Table S5:** Control Experiment<sup>a</sup>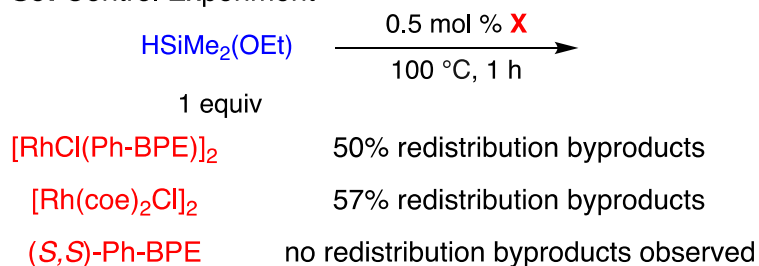

<sup>a</sup> All reactions were performed under N<sub>2</sub>. Yields were determined by <sup>1</sup>H NMR analysis.

In a N<sub>2</sub>-filled glovebox, an oven-dried pressure tube was charged with [RhCl(Ph-BPE)]<sub>2</sub> (**2**, 6.7 mg, 0.5 mol %) and HSiMe<sub>2</sub>(OEt) (**1**, 104 mg, 1 mmol). After stirring for 1 h at 100 °C in an oil bath, the reaction mixture was cooled to 22 °C. Conversion of **1** to redistribution byproducts were monitored by <sup>1</sup>H NMR. Note that due to the high volatility of some expected byproducts, the percentile of the observed redistribution is an approximate value based on <sup>1</sup>H NMR analysis.

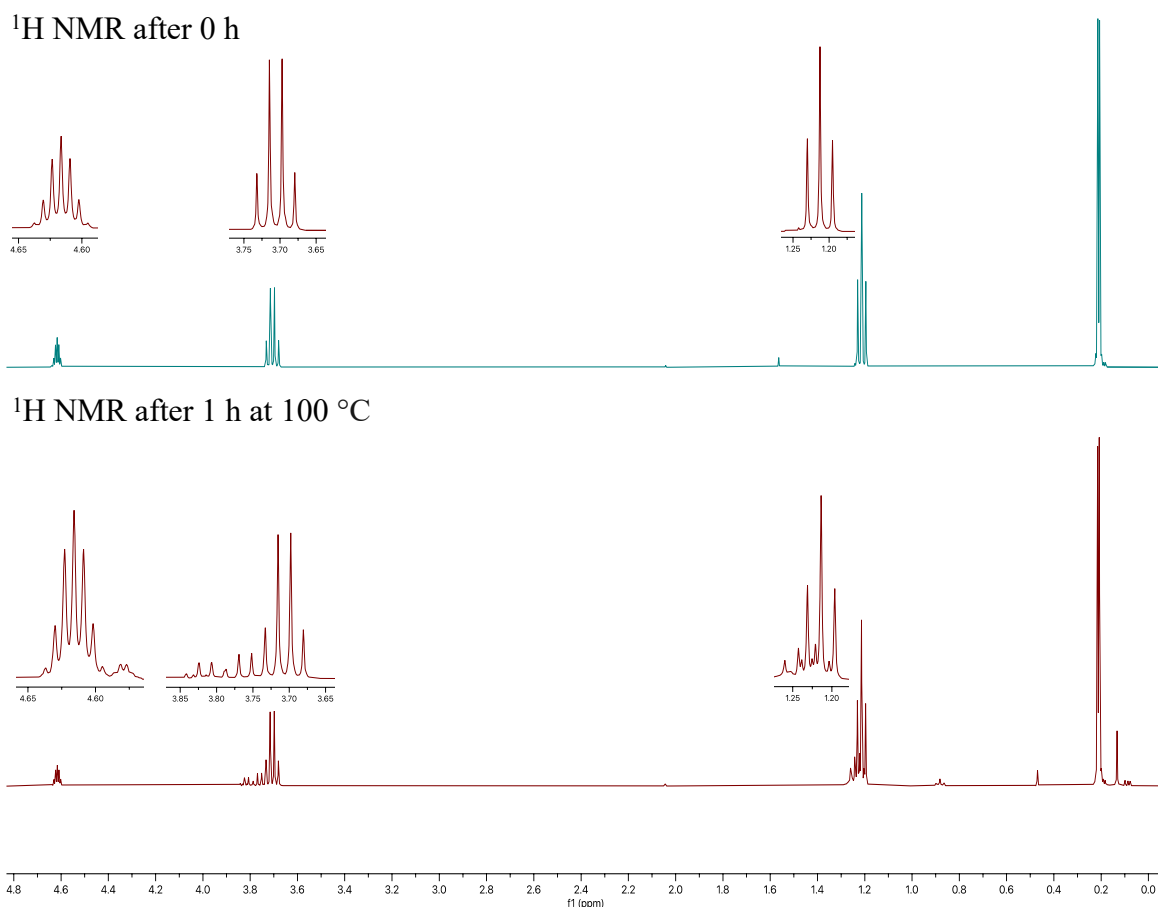

### 2.3 Synthesis of [RhCl(Ph-BPE)]<sub>2</sub> (2, Scheme 2):

In a N<sub>2</sub>-filled glovebox, an oven-dried vial was charged with [Rh(coe)<sub>2</sub>Cl]<sub>2</sub> (172 mg, 0.24 mmol, 1 equiv.), (*S,S*)-Ph-BPE (267 mg, 0.53 mmol, 2.2 equiv.), and THF (40 ml). After 6 h of stirring at 22 °C, the reaction mixture was filtered through a syringe filter and a clear orange solution was obtained. The volume of the resulting solution was decreased to one third and then hexane was added. Orangish-yellow solid form of [RhCl(Ph-BPE)]<sub>2</sub> (2) was obtained after trituration with hexane (>86% isolated yield). The resulting solid was collected by filtration and washed with hexane. <sup>1</sup>H NMR (400 MHz, CDCl<sub>3</sub>): δ 7.98 (d, 8H, *J* = 7.4 Hz), 7.43 (t, 8H, *J* = 6.8 Hz), 7.35–7.31 (m, 4H), 7.16–7.01 (m, 20H), 4.41–3.35 (m, 4H), 72.59–2.52 (m, 4H), 2.46–2.36 (m, 4H),

2.03–1.84 (m, 8H), 1.63–1.53 (m, 4H), 0.50–0.26 (m, 8H);  $^{31}\text{P}$  NMR ( $\text{CDCl}_3$ ):  $\delta$  106.0, 104.8. X-ray data is shown at the end of SI.

#### 2.4 Representative procedure for Rh-catalyzed C–H silylation of arenes (Scheme 2 and 3):

In a  $\text{N}_2$ -filled glovebox, an oven-dried pressure tube was charged with  $[\text{RhCl}(\text{Ph-BPE})]_2$  (**2**, 6.7 mg, 0.5 mol %) and benzene (1 ml). After stirring for 1 h at 100 °C in an oil bath, the reaction mixture was cooled to 22 °C. To the mixture, cyclohexene (99 mg, 1.2 equiv.) and  $\text{HSiMe}_2(\text{OEt})$  (**1**, 104 mg, 1 mmol) was added. The reaction mixture was allowed to stir for 20 h at 100 °C (>98% conversion, 94% yield by  $^1\text{H}$  NMR analysis). *Note that the product is slightly decomposed on silica gels. Higher isolated yield was obtained after following workup procedure in a  $\text{N}_2$ -filled glovebox:* evaporation of the crude mixture, diluting the residue with hexane, and filtration through a syringe filter by rinsing with hexane. The filtrate was then purified by vacuum distillation affording the desired product **P1** (94% isolated yield).

When all workup procedures were performed outside of the glovebox, a lower isolated yield was obtained; the resulting mixture was concentrated and purified by silica gel chromatography affording the desired product **P1**<sup>1</sup> as a colorless liquid (88 mg, 49% isolated yield).  $^1\text{H}$  NMR (400 MHz,  $\text{CDCl}_3$ ):  $\delta$  7.6–7.58 (m, 2H), 7.41–7.35 (m, 3H), 3.68 (q, 2H,  $J = 7.0$  Hz), 1.19 (t, 3H,  $J = 7.0$  Hz), 0.39 (s, 6H). Spectroscopic data were consistent with those previously reported.<sup>1</sup>

#### Ethoxy(2-fluorophenyl)dimethylsilane and regioisomers (**P2**)

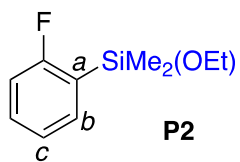

Modified procedure: 0.5 mol %  $[\text{RhCl}(\text{Ph-BPE})]_2$  (6.4 mg, 0.005 mmol) and fluorobenzene (1 ml, 10.7 mmol). Complex **P2** was obtained in a mixture ( $a:b:c=5.5:4.1:1$ ) [ $>98\%$  conv., 92% isolated yield (183 mg)].  $^1\text{H}$  NMR (400 MHz,  $\text{CDCl}_3$ ):  $^1\text{H}$  NMR (400 MHz,  $\text{CDCl}_3$ )  $\delta$  7.59–7.53 (m, 0.36H), 7.53–7.46 (m, 0.98H), 7.42–7.30 (m, 6.36H), 7.24 (d, 0.36H,  $J = 2.9$  Hz), 7.15 (t, 1H,  $J = 7.3$  Hz), 7.11–7.04 (m, 1.24H), 7.00 (t, 0.93H,  $J = 8.4$  Hz), 3.74 (q, 2H,  $J = 7.0$  Hz), 3.68 (q, 1.90H,  $J = 7.0$  Hz), 1.26–1.14 (m, 5.89H), 0.42 (s, 4.52H), 0.38 (s, 4.52H), 0.37 (s, 1.09H);  $^{13}\text{C}$  NMR (101 MHz,  $\text{CDCl}_3$ ):  $\delta$  167.20 (d,  $J = 241.4$  Hz), 164.14 (d,  $J = 248.5$  Hz), 162.78 (d,  $J = 248.3$  Hz), 141.35 (d,  $J = 3.8$  Hz), 135.58 (d,  $J = 7.4$  Hz), 135.52 (d,  $J = 11.1$  Hz), 133.77 (d,  $J = 3.7$  Hz), 131.97 (d,  $J = 8.4$  Hz), 129.79 (d,  $J = 6.8$  Hz), 129.05 (d,  $J = 3.1$  Hz), 124.31 (d,  $J = 30.0$  Hz), 123.97 (d,  $J = 2.9$  Hz), 119.88 (d,  $J = 18.4$  Hz), 116.55 (d,  $J = 21.1$  Hz), 115.10 (d,  $J = 19.6$  Hz), 114.92 (d,  $J = 25.4$  Hz), 58.96, 58.88, 58.77,



18.51, -0.91 (d,  $J = 1.8$  Hz), -1.55, -1.68;  $^{19}\text{F}$  NMR (376 MHz,  $\text{CDCl}_3$ ):  $\delta$  -100.72– -100.92 (m), -111.17– -111.32 (m), -113.49– -113.81 (m); HRMS (EI<sup>+</sup>): Calcd for  $[\text{C}_9\text{H}_{12}\text{FOSi}]^+ [\text{M}-\text{Me}]^+$ : 183.0636, found: 183.0634.

### (2,3-difluorophenyl)ethoxydimethylsilane and regioisomer (P3)

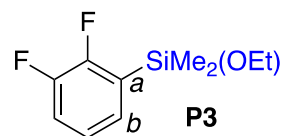

Modified procedure: 1 mol %  $[\text{RhCl}(\text{Ph-BPE})]_2$  (12.9 mg, 0.01 mmol) and 1,2-difluorobenzene (1 ml, 10.2 mmol). Complex **P3** was obtained in a mixture ( $a:b=2.6:1$ ). The reaction was clean, but some of the desired product was lost during the workup distillation resulting in low isolated yield [ $>98\%$  conv., 50% isolated yield (109 mg)].  $^1\text{H}$  NMR (400 MHz,  $\text{CDCl}_3$ ):  $\delta$  7.35 (ddd, 0.43H,  $J = 10.2, 8.4, 1.5$  Hz), 7.30–7.27 (m, 0.32H), 7.26–7.20 (m, 1H), 7.17 (m, 1.35H), 7.09 (m, 1.06H), 3.75 (q, 2H,  $J = 7.0$  Hz), 3.68 (q, 0.77H,  $J = 7.0$  Hz), 1.21 (dt, 4.19H,  $J = 12.3, 7.0$  Hz), 0.44 (s, 6.15H), 0.37 (s, 2.33H);  $^{13}\text{C}$  NMR (101 MHz,  $\text{CDCl}_3$ )  $\delta$  154.18 (dd,  $J = 242.1, 11.0$  Hz), 151.54 (dd,  $J = 250.5, 12.6$  Hz), 150.51 (dd,  $J = 250.6, 12.0$  Hz), 150.31 (dd,  $J = 250.3, 16.2$  Hz), 135.73 (dd,  $J = 4.7, 2.5$  Hz), 130.04 – 129.80 (m), 129.79 (dd,  $J = 9.9, 4.4$  Hz), 127.47 (dd,  $J = 26.4, 1.8$  Hz), 125.79 (d,  $J = 68.4$  Hz), 124.70 (dd,  $J = 5.3, 3.5$  Hz), 122.11 (d,  $J = 14.5$  Hz), 118.96 (d,  $J = 17.2$  Hz), 117.31 (d,  $J = 16.0$  Hz), 59.09, 58.90, 18.51, 18.49, -0.88 (d,  $J = 1.1$  Hz), -1.63;  $^{19}\text{F}$  NMR (376 MHz,  $\text{CDCl}_3$ ):  $\delta$  -127.75 (ddd,  $J = 24.0, 8.1, 4.0$  Hz), -136.42– -137.43 (m), -138.98 (dddd,  $J = 24.1, 10.4, 4.2, 1.2$  Hz), -139.23 (ddd,  $J = 20.4, 10.4, 7.5$  Hz); HRMS (CI): Calcd for  $[\text{C}_{10}\text{H}_{14}\text{F}_2\text{OSi}]^+ [\text{M}+\text{H}]^+$ : 217.0855, found: 217.0855.

### Ethoxydimethyl(2,4,6-trifluorophenyl)silane (P4)

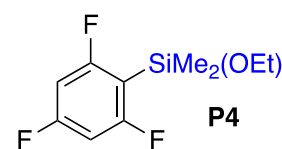

Modified procedure: 1.7 mol %  $[\text{RhCl}(\text{Ph-BPE})]_2$  (12.9 mg, 0.01 mmol), 1,3,5-trifluorobenzene (755 mg, 5.7 mmol), cyclohexene (59 mg, 0.72 mmol), and  $\text{HSiMe}_2(\text{OEt})$  (**1**, 63 mg, 0.6 mmol). The reaction was clean, but some of the desired product was lost during the workup distillation resulting in low isolated yield [ $>98\%$  conv., 64% isolated yield (90 mg)].  $^1\text{H}$  NMR (400 MHz,  $\text{CDCl}_3$ ):  $\delta$  6.66–6.54 (m, 1H), 3.72 (q, 2H,  $J = 7.0$  Hz), 1.19 (t, 3H,  $J = 7.0$  Hz), 0.46 (t, 6H,  $J = 1.8$  Hz);  $^{13}\text{C}$  NMR (101 MHz,  $\text{CDCl}_3$ ):  $\delta$  167.50 (ddd,  $J = 245.8, 19.2, 14.9$  Hz), 164.91 (dt,  $J = 250.8, 16.1$  Hz), 108.09 (td,  $J = 35.3, 4.2$  Hz), 100.19 (ddd,  $J = 31.9, 24.4, 3.9$  Hz), 59.14, 18.34, 0.41 (t,  $J = 3.0$  Hz);  $^{19}\text{F}$  NMR (376 MHz,  $\text{CDCl}_3$ ):  $\delta$  -94.81– -94.98 (m), -105.82 (p,  $J = 9.0$  Hz); HRMS (CI): Calcd for  $[\text{C}_{10}\text{H}_{13}\text{F}_3\text{OSi}]^+ [\text{M}+\text{H}]^+$ : 235.0761, found: 235.0761.

**Ethoxydimethyl(2,3,5,6-tetrafluorophenyl)silane (P5)**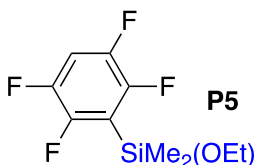

Modified procedure: 1 mol %  $[\text{RhCl}(\text{Ph-BPE})]_2$  (12.9 mg, 0.01 mmol) and 1,2,4,5-tetrafluorobenzene (1.35 g, 9 mmol) [79% conv., 63% isolated yield (160 mg)].  $^1\text{H}$  NMR (400 MHz,  $\text{CDCl}_3$ ):  $\delta$  7.06 (tt, 1H,  $J = 9.3, 7.4$  Hz), 3.75 (q, 2H,  $J = 7.0$  Hz), 1.21 (t, 3H,  $J = 7.0$  Hz), 0.51 (t, 6H,  $J = 1.8$  Hz);  $^{13}\text{C}$  NMR (101 MHz,  $\text{CDCl}_3$ ):  $\delta$  148.79 (dtd,  $J = 242.1, 13.0, 3.7$  Hz), 147.36–144.23 (m), 116.22 (tt,  $J = 32.2, 2.0$  Hz), 108.04 (tt,  $J = 22.7, 1.9$  Hz), 59.41, 18.30, 0.29 (t,  $J = 2.8$  Hz);  $^{19}\text{F}$  NMR (376 MHz,  $\text{CDCl}_3$ ):  $\delta$  -128.87– -129.05 (m), -138.74– -139.12 (m); HRMS (CI): Calcd for  $[\text{C}_{10}\text{H}_{12}\text{F}_4\text{OSi}]^+ [\text{M}+\text{H}]^+$ : 253.0666, found: 253.0667

**(3-Chlorophenyl)ethoxydimethylsilane and regioisomer (P6)**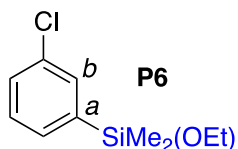

Modified procedure: 1 mol %  $[\text{RhCl}(\text{Ph-BPE})]_2$  (12.9 mg, 0.01 mmol) and chlorobenzene (2 mmol). Complex **P3** was obtained in a mixture ( $a:b=6.7:1$ ) [ $>98\%$  conv., 75% isolated yield (161 mg)].  $^1\text{H}$  NMR (400 MHz,  $\text{CDCl}_3$ ):  $\delta$  7.65–7.56 (m, 0.35H), 7.55–7.50 (m, 1H), 7.49 (t, 0.16H,  $J = 1.9$  Hz), 7.44 (dt, 1H,  $J = 7.0, 1.2$  Hz), 7.40–7.27 (m, 2.18H), 3.87–3.75 (m, 0.30H), 3.68 (q, 2H,  $J = 6.9$  Hz), 1.26–1.15 (m, 3.50H), 0.38 (s, 6H), 0.37 (s, 0.97H);  $^{13}\text{C}$  NMR (101 MHz,  $\text{CDCl}_3$ ):  $\delta$  140.96, 140.37, 136.51, 136.31, 136.00, 134.98, 134.45, 134.41, 133.60, 133.36, 131.49, 129.73, 129.49, 128.22, 127.96, 58.93, 18.45, -1.59, -1.63; HRMS (EI+) calcd for  $[\text{C}_9\text{H}_{12}\text{ClOSi}]^+ [\text{M}-\text{Me}]^+$ : 199.0341, found: 199.0339.

**(3,4-Dichlorophenyl)ethoxydimethylsilane (P7)**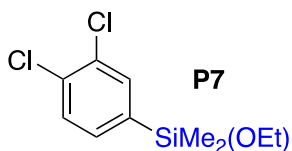

Modified procedure: 1 mol %  $[\text{RhCl}(\text{Ph-BPE})]_2$  (12.9 mg, 0.01 mmol) and 1,2-dichlorobenzene (1 ml, 9 mmol). The reaction was clean, but some of the desired product was lost during the workup distillation resulting in low isolated yield [ $>98\%$  conv., 52% isolated yield (129 mg)].  $^1\text{H}$  NMR (400 MHz,  $\text{CDCl}_3$ ):  $\delta$  7.62 (d, 1H,  $J = 1.4$  Hz), 7.45 (d, 1H,  $J = 7.8$  Hz), 7.37 (dd, 1H,  $J = 7.8, 1.4$  Hz), 3.68 (q, 4H,  $J = 7.0$  Hz), 1.20 (t, 3H,  $J = 7.0$  Hz), 0.38 (s, 6H);  $^{13}\text{C}$  NMR (101 MHz,  $\text{CDCl}_3$ ):  $\delta$  139.08, 135.36, 133.94, 132.66, 132.62, 130.27, 58.96, 18.53, -1.64; HRMS (CI): Calcd for  $[\text{C}_{10}\text{H}_{14}\text{Cl}_2\text{OSi}]^+ [\text{M}+\text{H}]^+$ : 249.0264, found: 249.0265.

**Benzo[*d*][1,3]dioxol-5-yl(ethoxy)dimethylsilane and regioisomer (P8)**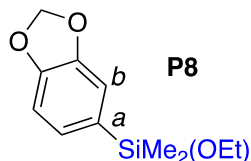**P8**

Modified procedure: 1 mol % [RhCl(Ph-BPE)]<sub>2</sub> (12.9 mg, 0.01 mmol) and 1,3-Benzodioxole (1 ml, 8.7 mmol). Complex **P8** was obtained in a mixture (*a*:*b*=8.3:1) [ $>98\%$  conv., 90% isolated yield (201 mg)]. <sup>1</sup>H NMR (400 MHz, CDCl<sub>3</sub>): δ 7.10–7.03 (m, 0.26H), 6.96 (dd, 1.12H, *J* = 6.2, 2.6 Hz), 6.90–6.81 (m, 2H), 5.95 (s, 0.25H), 5.94 (s, 2H), 3.73 (q, 2H, *J* = 7.0 Hz), 3.67 (q, 0.24H, *J* = 6.9 Hz), 1.21 (t, 3.37H, *J* = 7.0 Hz), 0.42 (s, 6H), 0.36 (s, 0.73H); <sup>13</sup>C NMR (101 MHz, CDCl<sub>3</sub>): δ 152.09, 148.93, 147.55, 146.32, 127.79, 126.57, 126.13, 121.50, 117.51, 112.93, 110.04, 108.70, 100.67, 100.33, 58.96, 58.73, 18.55, 18.51, -1.21, -1.49; HRMS (EI<sup>+</sup>): Calcd for [C<sub>11</sub>H<sub>16</sub>O<sub>3</sub>Si]<sup>+</sup> [M]<sup>+</sup>: 224.0863, found: 224.0860.

**Ethoxy(3-methoxyphenyl)dimethylsilane and regioisomers (P9)**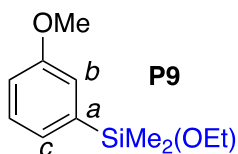**P9**

Modified procedure: 5 mol % [RhCl(Ph-BPE)]<sub>2</sub> (129 mg, 0.1 mmol) and Anisole (865 mg, 8 mmol). Complex **P9** was obtained in a mixture (*a*:*b*:*c*=4.8:1.3:1) [50% conv., 49% isolated yield (204 mg)]. <sup>1</sup>H NMR (400 MHz, CDCl<sub>3</sub>): δ 7.57 (d, 0.26H, *J* = 8.6 Hz), 7.51 (d, 0.65H, *J* = 8.7 Hz), 7.32 (dd, 1.60H, *J* = 8.2, 7.3 Hz), 7.16 (dt, 1H, *J* = 7.2, 1.0 Hz), 7.12–7.11 (m, 1H), 6.98–6.90 (m, 2.03H), 3.83 (s, 3H), 3.82 (s, 1.11H), 3.81 (s, 0.62H), 3.75 (q, 0.41H, *J* = 7.2 Hz), 3.66 (dq, 2.20H, *J* = 10.2, 7.0 Hz), 1.23 (dt, 1.89H, *J* = 6.9, 3.4 Hz), 1.19 (t, 3H, *J* = 7.0 Hz), 0.37 (s, 6H), 0.36 (s, 1.41H), 0.26 (s, 1.26H); <sup>13</sup>C NMR (101 MHz, CDCl<sub>3</sub>): δ 164.23, 160.91, 159.14, 139.77, 135.72, 135.44, 135.13, 131.39, 129.19, 129.06, 126.37, 125.81, 125.65, 120.57, 119.26, 119.08, 118.95, 115.64, 114.94, 113.92, 113.66, 109.70, 58.81, 58.66, 58.53, 55.19, 55.15, 55.10, 18.63, 18.55, 18.46, -1.05, -1.51, -1.60; HRMS (CI): Calcd for [C<sub>10</sub>H<sub>12</sub>F<sub>4</sub>OSi]<sup>+</sup> [M+H]<sup>+</sup>: 211.1149, found: 211.1149.

**Methyl 3-(ethoxydimethylsilyl)benzoate and regioisomers (P10)**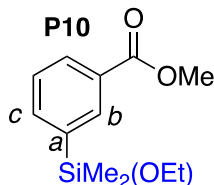**P10**

Modified procedure: 1 mol % [RhCl(Ph-BPE)]<sub>2</sub> (12.9 mg, 0.01 mmol), methyl benzoate (408 mg, 3 mmol), HSiMe<sub>2</sub>(OEt) (208 mg, 2 mmol), and cyclohexene (198 mg, 2.4 mmol). Complex **P10** was obtained in a mixture (*a*:*b*:*c*=3.7:2.9:1) [85% conv., 40% isolated yield (190 mg)]. <sup>1</sup>H NMR (400 MHz, CDCl<sub>3</sub>): δ 8.25 (s, 0.62H), 8.06 (dt, 0.74H, *J* = 7.8, 1.6 Hz), 8.03 (d, 0.66H, *J* = 8.3 Hz), 7.77 (dt, 0.68H, *J* = 7.3, 1.3 Hz), 7.66 (d, 0.65H, *J* = 8.3 Hz), 7.60–7.52 (m, 0.68H), 7.46 (td, 1H, *J* = 7.5, 0.6 Hz), 7.39–7.30 (m, 2.44H),

7.28–7.26 (m, 0.21H), 7.26–7.22 (m, 0.25H), 4.88–4.68 (m, 1.40H), 3.92 (d, 3H,  $J = 2.1$  Hz), 3.82 (q, 0.38H,  $J = 7.0$  Hz), 3.75 (q, 1.13H,  $J = 7.0$  Hz), 3.68 (q, 2H,  $J = 7.0$  Hz), 3.41–3.33 (m, 0.30H), 1.25–1.14 (m, 5.98H), 0.46–0.34 (m, 7.23H), 0.17 (s, 3.41H);  $^{13}\text{C}$  NMR (101 MHz,  $\text{CDCl}_3$ ):  $\delta$  167.46, 167.33, 144.32, 140.75, 138.79, 138.08, 134.63, 133.69, 133.56, 133.03, 132.52, 131.78, 131.08, 130.79, 129.70, 129.65, 128.75, 128.48, 128.43, 128.32, 128.01, 127.29, 126.68, 126.30, 126.10, 64.49, 58.95, 58.91, 58.30, 52.24, 52.22, 18.54, 18.47, 18.36, -1.59, -1.64, -2.95; HRMS (EI+) calcd for  $[\text{C}_{12}\text{H}_{17}\text{O}_3\text{Si}]^+ [\text{M}-\text{H}]^+$ : 237.0942, found: 237.0940.

### Ethoxydimethyl-[3-(trifluoromethyl)phenyl]silane and regioisomer (P11)

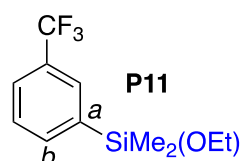

Modified procedure: 2 mol %  $[\text{RhCl}(\text{Ph-BPE})]_2$  (51.6 mg, 0.04 mmol), trifluorotoluene (1 ml, 8 mmol), cyclohexene (198 mg, 2.4 mmol), and  $\text{HSiMe}_2(\text{OEt})$  (**1**, 208 mg, 2 mmol). Complex **P11** was obtained in a mixture ( $a:b=1.8:1$ ) [69% conv., 66% isolated yield (327 mg)].  $^1\text{H}$  NMR (400 MHz,  $\text{CDCl}_3$ ):  $^1\text{H}$  NMR (400 MHz,  $\text{CDCl}_3$ )  $\delta$  7.81–7.79 (m, 1H), 7.75 (d, 1.13H,  $J = 7.4$  Hz), 7.72–7.67 (m, 1H), 7.63 (t, 2H,  $J = 8.0$  Hz), 7.52–7.47 (m, 1.20H), 3.69 (qd, 3.14H,  $J = 7.0, 1.2$  Hz), 1.20 (td, 4.69H,  $J = 7.0, 1.1$  Hz), 0.41 (s, 6H), 0.40 (s, 3.28H);  $^{13}\text{C}$  NMR (101 MHz,  $\text{CDCl}_3$ ):  $\delta$  143.20, 139.74, 136.87 (q,  $J = 0.3$  Hz), 133.85, 131.57 (q,  $J = 32.3$  Hz), 130.19 (q,  $J = 32.0$  Hz), 129.94 (q,  $J = 3.7$  Hz), 128.23, 126.29 (q,  $J = 3.7$  Hz), 124.56 (q,  $J = 272.5$  Hz), 124.46 (q,  $J = 3.8$  Hz), 123.02 (q,  $J = 276.8$  Hz), 58.92, 58.79, 18.46, 18.35, -1.30, -1.73;  $^{19}\text{F}$  NMR (376 MHz,  $\text{CDCl}_3$ ):  $\delta$  -62.65, -62.98; HRMS (EI+) calcd for  $[\text{C}_{10}\text{H}_{12}\text{F}_3\text{OSi}]^+ [\text{M}-\text{Me}]^+$ : 233.0604, found 233.0601.

### [3,5-Bis(trifluoromethyl)phenyl]ethoxydimethylsilane (P12)

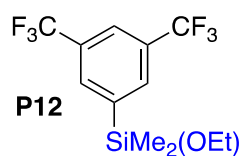

Modified procedure: 2 mol %  $[\text{RhCl}(\text{Ph-BPE})]_2$  (56 mg, 0.044 mmol), 1,3-bis(trifluoromethyl)benzene (1.9 g, 8.8 mmol, 4 equiv.), cyclohexene (217 mg, 2.64 mmol), and  $\text{HSiMe}_2(\text{OEt})$  (**1**, 229 mg, 2.2 mmol) [36% conv., 30% isolated yield (189 mg)].  $^1\text{H}$  NMR (400 MHz,  $\text{CDCl}_3$ ):  $\delta$  7.99 (s, 2H), 7.89 (s, 1H), 3.72 (q, 4H,  $J = 7.0$  Hz), 1.22 (t, 3H,  $J = 7.0$  Hz), 0.44 (s, 6H);  $^{13}\text{C}$  NMR (101 MHz,  $\text{CDCl}_3$ ):  $\delta$  141.97, 133.32 (q,  $J = 1.2$  Hz), 130.98 (q,  $J = 32.8$  Hz), 123.73 (q,  $J = 272.8$  Hz), 123.40 (p,  $J = 3.8$  Hz), 59.18, 18.49, -1.61;  $^{19}\text{F}$  NMR (376 MHz,  $\text{CDCl}_3$ ):  $\delta$  -62.87; HRMS (EI+): Calcd for  $[\text{C}_{11}\text{H}_{11}\text{F}_6\text{OSi}]^+ [\text{M}-\text{Me}]^+$ : 301.0478, found: 301.0474.

### Ethoxy (3-isopropylphenyl)dimethylsilane and regioisomer (P13)

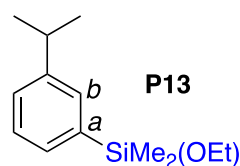

Modified procedure: 5 mol %  $[\text{RhCl}(\text{Ph-BPE})]_2$  (129 mg, 0.1 mmol), cumene (962 mg, 8 mmol, 4 equiv.), cyclohexene (197 mg, 2.4 mmol), and  $\text{HSiMe}_2(\text{OEt})$  (**1**, 208 mg, 2 mmol). Complex **P13** was obtained in a mixture ( $a:b=1.9:1$ ) [33% conv., 32% yield (142 mg)].  $^1\text{H}$  NMR (400 MHz,  $\text{CDCl}_3$ )  $\delta$  7.51 (d, 0.58H,  $J=7.9$  Hz), 7.43 (d, 0.71H,  $J=0.6$  Hz), 7.39 (dt, 0.84H,  $J=7.1, 1.4$  Hz), 7.31 (t, 1.04H,  $J=7.4$  Hz), 7.28 (t, 0.81H,  $J=1.8$  Hz), 7.25–7.14 (m, 1.57H), 3.75–3.59 (m, 2H), 3.04–2.83 (m, 0.81H), 1.26 (dd, 6.16H,  $J=6.9, 2.3$  Hz), 1.22–1.15 (m, 3.31H), 0.38 (s, 3.56H), 0.37 (s, 1.92H);  $^{13}\text{C}$  NMR (101 MHz,  $\text{CDCl}_3$ ):  $\delta$  150.40, 148.13, 137.98, 134.24, 133.71, 132.26, 131.74, 131.63, 131.08, 128.15, 127.91, 127.70, 127.38, 126.12, 58.77, 58.63, 34.31, 34.28, 24.16, 23.97, 18.56, 18.47, -1.53, -3.97; HRMS (CI): Calcd for  $[\text{C}_{13}\text{H}_{22}\text{OSi}]^+ [\text{M}+\text{H}]^+$ : 223.1513, found: 223.1512.

### (3-(*tert*-butyl)phenyl)ethoxydimethylsilane (**P14**)

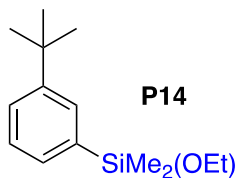

Modified procedure: 5 mol %  $[\text{RhCl}(\text{Ph-BPE})]_2$  (129 mg, 0.1 mmol), *tert*-butylbenzene (1074 mg, 8 mmol, 4 equiv.), cyclohexene (197 mg, 2.4 mmol), and  $\text{HSiMe}_2(\text{OEt})$  (**1**, 208 mg, 2 mmol). **P14** was unable to be isolated and characterized (13% conv.). HRMS (CI): Calcd for  $[\text{C}_{13}\text{H}_{21}\text{OSi}]^+ [\text{M}-\text{Me}]^+$ : 221.1356, found: 221.1356.

### 2-(Ethoxydimethylsilyl)-*N*-methyl-pyrrole and regioisomer (**P15**)

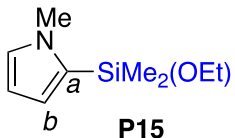

Modified procedure: 0.5 mol %  $[\text{RhCl}(\text{Ph-BPE})]_2$  (6.4 mg, 0.005 mmol), and 1-Methylpyrrole (1 ml, 11.3 mmol) [ $>98\%$  conv., 85% isolated yield (156 mg)]. Complex **P15** was obtained in a mixture ( $a:b=7.1:1$ ).  $^1\text{H}$  NMR (400 MHz,  $\text{CDCl}_3$ ):  $\delta$  6.81 (dd, 1H,  $J=2.4, 1.6$  Hz), 6.73 (t, 0.11H,  $J=1.8$  Hz), 6.70 (t, 0.11H,  $J=2.2$  Hz), 6.44 (dd, 1H,  $J=3.5, 1.5$  Hz), 6.27 (dd, 0.11H,  $J=2.5, 1.6$  Hz), 6.16 (dd, 1H,  $J=3.5, 2.4$  Hz), 3.78 (s, 3H), 3.68 (s, 0.43H), 3.64 (q, 2.24H,  $J=7.0$  Hz), 1.16 (t, 3.58H,  $J=7.0$  Hz), 0.39 (s, 6.12H), 0.31 (s, 0.86H);  $^{13}\text{C}$  NMR (100 MHz,  $\text{CDCl}_3$ ):  $\delta$  130.7, 127.4, 120.6, 108.0, 58.5, 36.8, 18.4, -1.0; HRMS (EI+) calcd for  $[\text{C}_9\text{H}_{17}\text{NOSi}]^+ [\text{M}]^+$ : 183.1074, found: 183.1072.

### Ethoxy(furan-2-yl)dimethylsilane (**P16**)

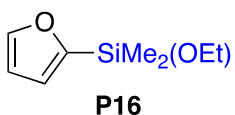

Modified procedure: 0.5 mol %  $[\text{RhCl}(\text{Ph-BPE})]_2$  (12.9 mg, 0.01 mmol), furan (2 ml, 27.5 mmol), cyclohexene (198 mg, 2.4 mmol), and  $\text{HSiMe}_2(\text{OEt})$  (**1**, 208 mg, 2 mmol) [ $>98\%$  conv., 99% isolated yield (338 mg)].  $^1\text{H}$  NMR (400 MHz,  $\text{CDCl}_3$ ):  $\delta$  7.67

(dd, 1H,  $J = 1.6, 0.6$  Hz), 6.92–6.61 (m, 1H), 6.40 (dd, 1H,  $J = 3.2, 1.6$  Hz), 3.70 (q, 2H,  $J = 7.0$  Hz), 1.17 (t, 3H,  $J = 7.0$  Hz), 0.38 (s, 6H);  $^{13}\text{C}$  NMR (101 MHz,  $\text{CDCl}_3$ ):  $\delta$  158.21, 146.99, 120.95, 109.44, 59.08, 18.41, -1.92; HRMS (EI+) calcd for  $[\text{C}_8\text{H}_{14}\text{O}_2\text{Si}]^+ [\text{M}]^+$ : 170.0758, found: 170.0755. Spectroscopic data were consistent with those previously reported.<sup>2</sup>

### Ethoxydimethyl(thiophen-2-yl)silane (P17)

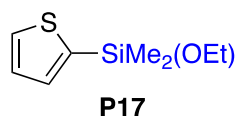

Modified procedure: 1 mol %  $[\text{RhCl}(\text{Ph-BPE})]_2$  (25.8 mg, 0.02 mmol), thiophene (505 mg, 6 mmol), cyclohexene (198 mg, 2.4 mmol), and  $\text{HSiMe}_2(\text{OEt})$  (**1**, 208 mg, 2 mmol) [67% conv., 59% isolated yield (220 mg)].  $^1\text{H}$  NMR (400 MHz,  $\text{CDCl}_3$ ):  $\delta$  7.64 (dd, 1H,  $J = 4.6, 0.9$  Hz), 7.37 (dd, 1H,  $J = 3.3, 0.9$  Hz), 7.22 (dd, 1H,  $J = 4.6, 3.3$  Hz), 3.70 (q, 2H,  $J = 7.0$  Hz), 1.19 (t, 3H,  $J = 7.0$  Hz), 0.44 (s, 6H);  $^{13}\text{C}$  NMR (100 MHz,  $\text{CDCl}_3$ ):  $\delta$  137.5; 135.1; 131.2; 58.9; 18.5; -0.5; HRMS (EI+) calcd for  $[\text{C}_8\text{H}_{14}\text{OSSi}]^+ [\text{M}]^+$ : 186.0529, found: 186.0526.

### *tert*-Butyl 3-(ethoxydimethylsilyl)-1*H*-pyrrole-1-carboxylate (P18)

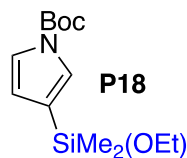

Modified procedure: 2 mol %  $[\text{RhCl}(\text{Ph-BPE})]_2$  (49.5 mg, 0.038 mmol), *N*-Boc-pyrrole (1 ml, 10.2 mmol), cyclohexene (188 mg, 2.29 mmol), and  $\text{HSiMe}_2(\text{OEt})$  (**1**, 199 mg, 1.91 mmol) [26% conv., 26% isolated yield (132 mg)].  $^1\text{H}$  NMR (400 MHz,  $\text{CDCl}_3$ ):  $\delta$  7.34 (t, 1H,  $J = 1.7$  Hz), 7.30 (dd, 1H,  $J = 3.0, 1.9$  Hz), 6.30 (dd, 1H,  $J = 3.0, 1.6$  Hz), 3.67 (q, 2H,  $J = 7.0$  Hz), 1.60 (s, 9H), 1.18 (t, 3H,  $J = 7.0$  Hz), 0.33 (s, 6H);  $^{13}\text{C}$  NMR (101 MHz,  $\text{CDCl}_3$ ):  $\delta$  148.88, 126.37, 121.20, 120.23, 116.10, 83.83, 58.64, 28.09, 18.54, -1.13; HRMS (CI): Calcd for  $[\text{C}_{12}\text{H}_{20}\text{NO}_3\text{Si}]^+ [\text{M-Me}]^+$ : 254.1207, found: 254.1207.

### 2-(Ethoxydimethylsilyl)-1-methyl-1*H*-indole (P19)

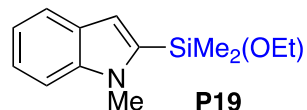

Modified procedure: 0.5 mol %  $[\text{RhCl}(\text{Ph-BPE})]_2$  (6.4 mg, 0.01 mmol) and 1-methylindole (1 ml) in THF at 50 °C (>98% conv., 92% isolated yield).  $^1\text{H}$  NMR (400 MHz,  $\text{CDCl}_3$ ):  $\delta$  7.64 (d, 1H,  $J = 7.9$  Hz), 7.36 (d, 1H,  $J = 8.3$  Hz), 7.26 (t, 1H,  $J = 7.3$  Hz), 7.11 (t, 1H,  $J = 7.4$  Hz), 6.77 (s, 1H), 3.93 (s, 3H), 3.69 (q, 2H,  $J = 7.0$  Hz), 1.20 (t, 3H,  $J = 7.0$  Hz), 0.50 (d, 6H,  $J = 1.1$  Hz);  $^{13}\text{C}$  NMR (101 MHz,  $\text{CDCl}_3$ ):  $\delta$  140.33, 138.86, 128.30, 122.57, 121.09, 119.34, 112.77, 109.36, 58.92, 32.87, 18.42, -0.93; HRMS (EI+) calcd for  $[\text{C}_{13}\text{H}_{19}\text{NOSi}]^+ [\text{M}]^+$ : 233.1230, found: 233.1232.

### Benzofuran-2-yl(ethoxy)dimethylsilane (P20)

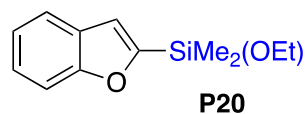

Modified procedure: 0.5 mol %  $[\text{RhCl}(\text{Ph-BPE})]_2$  (6.4 mg, 0.005 mmol), and benzofuran (236 mg, 2 mmol) [ $>98\%$  conv., 97% isolated yield (214 mg)].  $^1\text{H}$  NMR (400 MHz,  $\text{CDCl}_3$ ):  $\delta$  7.61 (dd, 1H,  $J = 7.7, 0.6$  Hz), 7.53 (dd, 1H,  $J = 8.2, 1.0$  Hz), 7.30 (td, 1H,  $J = 7.7, 1.3$  Hz), 7.22 (td, 1H,  $J = 7.5, 1.0$  Hz), 3.77 (q, 2H,  $J = 7.0$  Hz), 1.21 (t, 3H,  $J = 7.0$  Hz), 0.47 (s, 6H);  $^{13}\text{C}$  NMR (101 MHz,  $\text{CDCl}_3$ ):  $\delta$  160.98, 158.13, 127.79, 124.91, 122.58, 121.43, 117.38, 111.64, 59.31, 18.43, -1.90; HRMS (EI+) calcd for  $[\text{C}_{12}\text{H}_{16}\text{O}_2\text{Si}]^+ [\text{M}]^+$ : 220.0914, found: 220.0912.

#### Ethoxy(5-methoxybenzofuran-2-yl)dimethylsilane (P21)

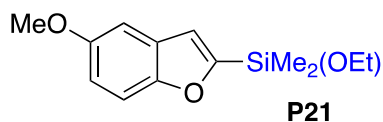

Modified procedure: 0.5 mol %  $[\text{RhCl}(\text{Ph-BPE})]_2$  (6.4 mg, 0.005 mmol), and 5-methoxybenzofuran (271 mg, 1.1 mmol) [ $>98\%$  conv., 97% isolated yield (242 mg)].  $^1\text{H}$  NMR (400 MHz,  $\text{CDCl}_3$ ):  $\delta$  7.41 (d, 1H,  $J = 8.9$  Hz), 7.04 (d, 1H,  $J = 2.6$  Hz), 7.00 (d, 1H,  $J = 1.0$  Hz), 6.92 (dd, 1H,  $J = 8.9, 2.6$  Hz), 3.84 (s, 3H), 3.76 (q, 2H,  $J = 7.0$  Hz), 1.20 (t, 3H,  $J = 7.0$  Hz), 0.45 (s, 6H);  $^{13}\text{C}$  NMR (101 MHz,  $\text{CDCl}_3$ ):  $\delta$  161.97, 155.90, 153.28, 128.28, 117.41, 114.04, 111.97, 103.33, 59.26, 55.97, 18.40, -1.95; HRMS (EI+) calcd for  $[\text{C}_{13}\text{H}_{18}\text{O}_3\text{Si}]^+ [\text{M}]^+$ : 250.1020, found: 250.1018.

#### Benzo[b]thiophen-2-yl(ethoxy)dimethylsilane (P22)

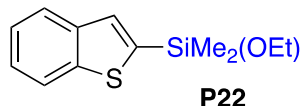

Modified procedure: 1 mol %  $[\text{RhCl}(\text{Ph-BPE})]_2$  (12.9 mg, 0.01 mmol), and thianaphene (148 mg, 1.1 mmol) [ $>98\%$  conv., 99% isolated yield (235 mg)].  $^1\text{H}$  NMR (400 MHz,  $\text{CDCl}_3$ ):  $\delta$  7.95–7.92 (m, 1H), 7.90–7.86 (m, 1H), 7.60 (d, 1H,  $J = 0.5$  Hz), 7.42–7.34 (m, 2H), 3.79 (q, 2H,  $J = 7.0$  Hz), 1.25 (t, 3H,  $J = 7.0$  Hz), 0.54 (s, 6H);  $^{13}\text{C}$  NMR (101 MHz,  $\text{CDCl}_3$ )  $\delta$  143.76, 140.96, 139.54, 131.98, 124.66, 124.20, 123.86, 122.40, 59.14, 18.49, -0.69; HRMS (EI+) calcd for  $[\text{C}_{12}\text{H}_{16}\text{OSSi}]^+ [\text{M}]^+$ : 236.0686, found: 236.0684.

### 2.5 Representative procedure for Rh-catalyzed Double C–H silylation of Heteroarenes (Scheme 4):

In a  $\text{N}_2$ -filled glovebox, an oven-dried pressure tube was charged with  $[\text{RhCl}(\text{Ph-BPE})]_2$  (**2**, 6.7 mg, 0.5 mol %), and furan (68 mg, 1 equiv.). After stirring for 1 h at 100 °C in an oil bath, the reaction mixture was cooled to 22 °C. To the mixture, cyclohexene (197 mg, 2.4 equiv.) and  $\text{HSiMe}_2(\text{OEt})$  (**1**, 261 mg, 2.5 mmol) was added. The reaction mixture was allowed to stir for 20 h at 100 °C. Yields were obtained with the following workup procedure in an  $\text{N}_2$ -filled glovebox: the crude mixture was evaporated, the residue diluted with hexane, and filtered through a syringe



filter by rinsing with hexane. The filtrate was then purified by reduced pressure distillation under vacuum to obtain the desired product **P23** [98% conv., 92% isolated yield (251 mg)].

### 2,5-Bis(ethoxydimethylsilyl)furan (**P23**)

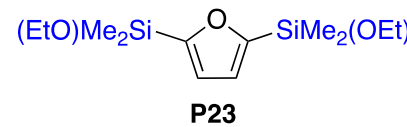 **P23**  $^1\text{H NMR}$  (400 MHz,  $\text{CDCl}_3$ ):  $\delta$  6.72 (s, 2H), 3.70 (q, 4H,  $J = 7.0$  Hz), 1.16 (t, 6H,  $J = 7.0$  Hz), 0.38 (s, 12H);  $^{13}\text{C NMR}$  (101 MHz,  $\text{CDCl}_3$ )  $\delta$  162.85, 120.46, 59.07, 18.36, -1.86; HRMS (CI): Calcd for  $[\text{C}_{12}\text{H}_{24}\text{O}_3\text{Si}_2]^+ [\text{M}]^+$ : 272.1258, found: 272.1260.

### 2,5-Bis(ethoxydimethylsilyl)thiofuran (**P24**)

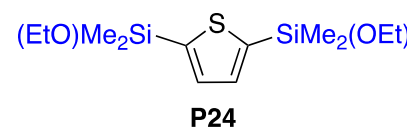 **P24** [ $>98\%$  conv., 98% isolated yield (283 mg)].  $^1\text{H NMR}$  (400 MHz,  $\text{CDCl}_3$ ):  $\delta$  7.42 (s, 2H), 3.70 (q, 4H,  $J = 7.0$  Hz), 1.18 (t, 6H,  $J = 7.0$  Hz), 0.44 (s, 12H);  $^{13}\text{C NMR}$  (101 MHz,  $\text{CDCl}_3$ )  $\delta$  143.85, 135.92, 58.91, 18.45, -0.45; HRMS (CI): Calcd for  $[\text{C}_{12}\text{H}_{24}\text{O}_2\text{SSi}_2]^+ [\text{M}]^+$ : 288.1030, found: 288.1031.

### 2,5-Bis(ethoxydimethylsilyl)-1-methyl-1H-pyrrole (**P25**)

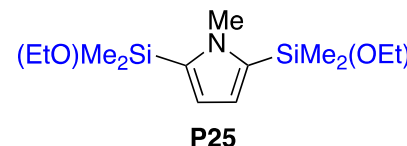 **P25** was unable to be isolated and characterized [ $<5\%$  conv.].

## 3. Synthesis and Characterization of Piers-Rubinsztajn Products

Some of the aryl-dimethylethoxysilanes products showed varying degrees of decomposition due to air and/or moisture sensitivity. In order to confirm the identity of the desired products, C–H silylation products were converted into stable siloxanes by the Piers–Rubinsztajn reaction.<sup>3</sup> *Note that the Piers–Rubinsztajn reaction conditions were not optimized.*

### 3.1 Representative procedure for Piers–Rubinsztajn Reaction

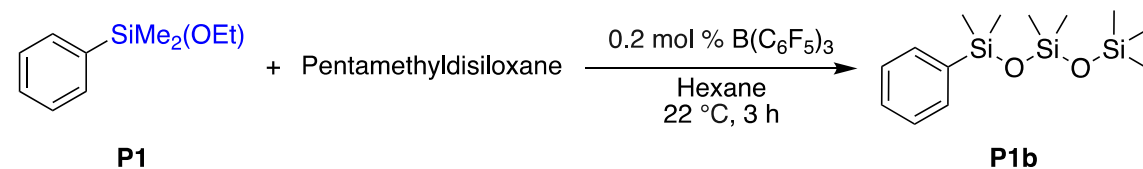

In a  $\text{N}_2$ -filled glovebox, to an oven-dried vial, pentamethyldisiloxane (1.1 g, 4.9 mmol) was added to a solution of phenyldimethylethoxysilane (**P1**, 270 mg, 1.5 mmol) in dry hexane (3 ml). The



mixture was allowed to stir at 22 °C for 10 min before the addition of 0.2 mol% tris(pentafluorophenyl)borane (1.54 mg, 0.003 mmol). After 5 min, rapid evolution of gas and heat from the solution occurred. The mixture was allowed to stir for 3 h and cool to 22 °C before the addition of neutral alumina (0.5 g). The resulting mixture was filtered through a syringe filter by rinsing with hexane, concentrated, and purified by silica gel chromatography affording the desired product **P1b** as a colorless liquid [53% isolated yield (236 mg)]. <sup>1</sup>H NMR (400 MHz, CDCl<sub>3</sub>): δ 7.58–7.55 (m, 2H), 7.36 (dd, 3H, *J* = 5.0, 1.9 Hz), 0.34 (s, 6H), 0.07 (s, 9H), 0.04 (s, 6H); <sup>13</sup>C NMR (101 MHz, CDCl<sub>3</sub>): δ 140.08, 133.17, 129.33, 127.80, 1.94, 1.43, 0.92; HRMS (EI<sup>+</sup>) calcd for [C<sub>12</sub>H<sub>23</sub>O<sub>2</sub>Si<sub>3</sub>]<sup>+</sup> [M–Me]<sup>+</sup>: 283.1000, found: 283.0998.

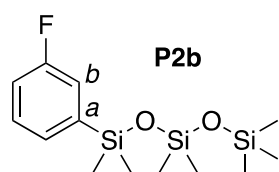

**1-(3-Fluorophenyl)-1,1,3,3,5,5,5-heptomethyltrisiloxane and regioisomer (P2b)**

Modified procedure: 1 mol % B(C<sub>6</sub>F<sub>5</sub>)<sub>3</sub> (4.7 mg, 0.0092 mmol), ethoxy(2-fluorophenyl)dimethylsilane and regioisomer (**P2**, 183 mg, 0.93 mmol), pentamethyldisiloxane (206 mg, 1.29 mmol), and dry hexane (5 ml). Complex **P2b** was obtained in a mixture (*a*:*b*=2.2:1) [43% isolated yield (125 mg)]. <sup>1</sup>H NMR (400 MHz, CDCl<sub>3</sub>): δ 7.52 (td, 1H, *J* = 7.3, 1.9 Hz), 7.40–7.29 (m, 1.67H), 7.25–7.19 (m, 0.29H), 7.14 (t, 1H), 7.05 (tdd, 0.5H, *J* = 9.3, 4.1, 2.0 Hz), 6.98 (t, 0.95H, *J* = 8.4 Hz), 0.40 (s, 6H), 0.35 (s, 2.67H), 0.15–0.00 (m, 21.32H); <sup>13</sup>C NMR (101 MHz, CDCl<sub>3</sub>) δ 167.04 (d, *J* = 241.1 Hz), 162.77 (d, *J* = 248.0 Hz), 143.22 (d, *J* = 3.9 Hz), 135.36 (d, *J* = 11.1 Hz), 131.71 (d, *J* = 8.2 Hz), 129.64 (d, *J* = 7.0 Hz), 128.64 (d, *J* = 3.0 Hz), 125.93 (d, *J* = 29.8 Hz), 123.86 (d, *J* = 2.7 Hz), 119.55 (d, *J* = 18.4 Hz), 116.23 (d, *J* = 21.1 Hz), 114.78 (d, *J* = 25.4 Hz), 1.96, 1.92, 1.48 (d, *J* = 1.5 Hz), 1.41, 1.35, 0.84; HRMS (EI<sup>+</sup>) calcd for [C<sub>12</sub>H<sub>22</sub>FO<sub>2</sub>Si<sub>3</sub>]<sup>+</sup> [M–Me]<sup>+</sup>: 301.0906, found: 301.0903.

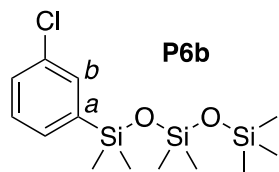

**1-(3-Chlorophenyl)-1,1,3,3,5,5,5-heptomethyltrisiloxane and regioisomer (P6b)**

Modified procedure: 1 mol % B(C<sub>6</sub>F<sub>5</sub>)<sub>3</sub> (5.1 mg, 0.01 mmol), (3-chlorophenyl)ethoxydimethylsilane and regioisomer (**P6**, 161 mg, 0.75 mmol), pentamethyldisiloxane (168 mg, 1.13 mmol), and dry hexane (5 ml). Complex **P3b** was obtained in a mixture that was not able to be separated [13% isolated yield (32 mg)]. <sup>1</sup>H NMR (400 MHz, CDCl<sub>3</sub>): δ 7.62–7.26 (m, 4H), 0.46–0.29 (m, 6H), 0.12–0.02 (m, 15H); <sup>13</sup>C NMR (101

MHz, CDCl<sub>3</sub>):  $\delta$  142.77, 134.90, 134.57, 134.28, 133.34, 133.16, 133.00, 131.40, 131.07, 129.67, 129.39, 129.34, 129.25, 128.05, 127.96, 127.80, 31.75, 22.82, 14.28, 1.92, 1.41, 0.83; HRMS (EI<sup>+</sup>) calcd for [C<sub>12</sub>H<sub>22</sub>ClO<sub>2</sub>Si<sub>3</sub>]<sup>+</sup> [M–Me]<sup>+</sup>: 317.0611, found: 3117.0606.

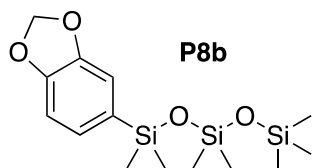

**1-(Benzo[*d*][1,3]dioxol-5-yl)-1,1,3,3,5,5,5-heptamethyltrisiloxane (P8b)**

Modified procedure: 1 mol % B(C<sub>6</sub>F<sub>5</sub>)<sub>3</sub> (4.6 mg, 0.009 mmol), benzo[*d*][1,3]dioxol-5-yl(ethoxy)dimethylsilane and regioisomer (**P8**, 201 mg, 0.9 mmol), pentamethyldisiloxane (479 mg, 3.2 mmol), and dry hexane (5 ml) [24% isolated yield (75 mg)]. <sup>1</sup>H NMR (400 MHz, CDCl<sub>3</sub>):  $\delta$  6.98 (dd, *J* = 5.7, 3.2 Hz, 1H), 6.88–6.79 (m, 2H), 5.92 (s, 2H), 0.38 (s, 6H), 0.08 (s, 9H), 0.06 (s, 6H); <sup>13</sup>C NMR (101 MHz, CDCl<sub>3</sub>):  $\delta$  151.64, 146.17, 126.44, 121.33, 119.34, 109.75, 100.24, 1.92, 1.36, 1.19; HRMS (EI<sup>+</sup>) calcd for [C<sub>14</sub>H<sub>26</sub>O<sub>4</sub>Si<sub>3</sub>]<sup>+</sup> [M]<sup>+</sup>: 342.1133, found: 342.1133.

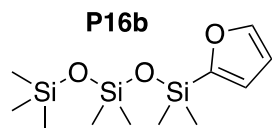

**1-(Furan-2-yl)-1,1,3,3,5,5,5-heptamethyltrisiloxane (P16b)**

Modified procedure: 1 mol % B(C<sub>6</sub>F<sub>5</sub>)<sub>3</sub> (7 mg, 0.014 mmol), ethoxy(furan-2-yl)dimethylsilane (**P16**, 232 mg, 1.4 mmol), pentamethyldisiloxane (485 mg, 3.3 mmol), and dry hexane (5 ml) [41% isolated yield (160 mg)]. <sup>1</sup>H NMR (400 MHz, CDCl<sub>3</sub>):  $\delta$  7.64 (dd, 1H, *J* = 1.7, 0.6 Hz), 6.70 (dd, 1H, *J* = 3.3, 0.6 Hz), 6.39 (dd, 1H, *J* = 3.2, 1.6 Hz), 0.36 (s, 6H), 0.08 (s, 9H), 0.02 (s, 6H); <sup>13</sup>C NMR (101 MHz, CDCl<sub>3</sub>):  $\delta$  159.60, 146.48, 119.98, 109.36, 1.87, 1.17, 0.35; HRMS (EI<sup>+</sup>) calcd for [C<sub>10</sub>H<sub>21</sub>O<sub>3</sub>Si<sub>3</sub>]<sup>+</sup> [M–Me]<sup>+</sup>: 273.0793, found: 273.0795.

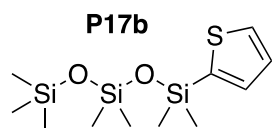

**1,1,1,3,3,5,5-Heptamethyl-5-(thiophen-2-yl)trisiloxane (P17b)**

Modified procedure: 1 mol % B(C<sub>6</sub>F<sub>5</sub>)<sub>3</sub> (2.3 mg, 0.0046 mmol), 2-(dimethylethoxysilyl)thiofuran (**P17**, 85 mg, 0.46 mmol), pentamethyldisiloxane (81 mg, 0.55 mmol), and dry hexane (2 ml) [74% isolated yield (103 mg)]. <sup>1</sup>H NMR (400 MHz, CDCl<sub>3</sub>):  $\delta$  7.60 (dd, 1H, *J* = 4.6, 0.9 Hz), 7.40–7.34 (m, 0.25H), 7.32 (dd, 0.85H, *J* = 3.3, 0.9 Hz), 7.28 (dd, 0.40H, *J* = 3.3, 0.9 Hz), 7.18 (td, 1.26H, *J* = 4.4, 3.3 Hz), 0.40 (s, 6H), 0.38 (s, 2.48H), 0.09 (s, 2.81H), 0.07 (s, 8.93H), 0.05 (s, 2.12H), 0.03 (s, 6H); <sup>13</sup>C NMR (101 MHz, CDCl<sub>3</sub>):  $\delta$  139.63, 139.35, 134.43, 134.33, 130.80, 130.65, 128.13, 128.05, 1.95, 1.91, 1.89, 1.86, 1.35, 1.31; HRMS (EI<sup>+</sup>) calcd for [C<sub>10</sub>H<sub>21</sub>O<sub>2</sub>SSi<sub>3</sub>]<sup>+</sup> [M–Me]<sup>+</sup>: 289.0565, found: 289.0562.

**1-[Benzofuran-2-yl]-1,1,3,3,5,5,5-heptamethyltrisiloxane (P20b)**

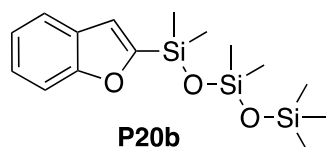

Modified procedure: 1 mol %  $B(C_6F_5)_3$  (5.1 mg, 0.01 mmol), benzofuran-2-yl(ethoxy)dimethylsilane (**P20**, 203 mg, 0.92 mmol), pentamethyldisiloxane (356 mg, 2.4 mmol), and dry hexane (5 ml) [47% isolated yield (146 mg)].  $^1H$  NMR (400 MHz,  $CDCl_3$ ):  $\delta$  7.60 (dd, 1H,  $J = 7.7, 0.6$  Hz), 7.52 (dd, 1H,  $J = 8.2, 0.9$  Hz), 7.30 (td, 1H,  $J = 7.8, 1.4$  Hz), 7.26–7.17 (m, 1H), 7.04 (d, 2H,  $J = 1.0$  Hz), 0.45 (s, 6H), 0.08 (s, 9H), 0.07 (s, 6H);  $^{13}C$  NMR (101 MHz,  $CDCl_3$ ):  $\delta$  162.39, 158.00, 127.93, 124.69, 122.47, 121.38, 116.42, 111.56, 1.89, 1.26, 0.41; HRMS (EI+) calcd for  $[C_{15}H_{26}O_3Si_3]^+ [M]^+$ : 338.1184, found: 338.1185.

**1-((2-(Dimethylsilyl)benzofuran-5-yl)oxy)-1,1,3,3,3-pentamethyldisiloxane (P21b) and 1,1,1,3,3,5,5-Heptamethyl-5-(5-((3-(1,1,3,3,3-pentamethyldisiloaneyl)oxy)-benzofuran-2-yl)trisiloxane (P21c)**

Modified procedure: 1 mol %  $B(C_6F_5)_3$  (4.5 mg, 0.0087 mmol), ethoxy(5-methoxybenzofuran-2-yl)dimethylsilane (**P21**, 218 mg, 0.87 mmol), pentamethyldisiloxane (465 mg, 3.1 mmol), and dry hexane (5 ml). A mixture of two products, **P21b** and **P21c**, were obtained. The major product, **P21b** [56% isolated yield (166 mg)], and the minor product, **P21c** [15% isolated yield (66 mg)], shown below were identified by  $^1H$  and  $^{13}C$  NMR.

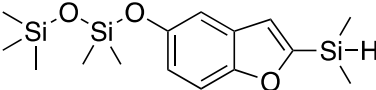  
**P21b**  $^1H$  NMR (400 MHz,  $CDCl_3$ ):  $\delta$  7.35 (d,  $J = 8.9$  Hz, 1H), 7.06 (d, 1H,  $J = 2.3$  Hz), 6.95 (d, 1H,  $J = 0.9$  Hz), 6.87 (dd, 1H,  $J = 8.8, 2.5$  Hz), 4.50 (hept, 1H,  $J = 3.8$  Hz), 0.42 (d, 6H,  $J = 3.8$  Hz), 0.22 (s, 6H), 0.12 (s, 9H);  $^{13}C$  NMR (101 MHz,  $CDCl_3$ ):  $\delta$  161.42, 154.03, 150.28, 128.62, 117.96, 117.58, 111.43, 110.73, 1.91, -0.32, -4.60; HRMS (EI+) calcd for  $[C_{15}H_{26}O_3Si_3]^+ [M]^+$ : 338.1184, found: 338.1182.

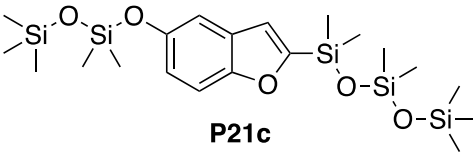  
**P21c**  $^1H$  NMR (400 MHz,  $CDCl_3$ ):  $\delta$  7.35 (d, 1H,  $J = 8.7$  Hz), 7.08 (d, 3H,  $J = 2.5$  Hz), 6.94 (d, 2H,  $J = 1.0$  Hz), 6.87 (dd, 3H,  $J = 8.8, 2.4$  Hz), 0.43 (s, 17H), 0.23 (s, 16H), 0.12 (s, 25H), 0.08 (s, 22H), 0.07 (s, 14H);  $^{13}C$  NMR (101 MHz,  $CDCl_3$ ):  $\delta$  163.29, 153.65, 150.21, 128.55, 117.96, 116.43, 111.54, 110.89, 1.90, 1.88, 1.26, 0.40, -0.30; HRMS (EI+) calcd for  $[C_{20}H_{40}O_5Si_5]^+ [M]^+$ : 500.1717, found: 500.1713.

**1-(Benzo[b]thiophen-2-yl)-1,1,3,3,5,5,5-heptomethyltrisiloxane (P22b)**

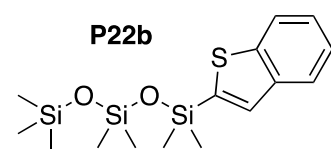

Modified procedure: 1.8 mol %  $\text{B}(\text{C}_6\text{F}_5)_3$  (8.4 mg, 0.017 mmol), 2 benzo[*b*]thiophen-2-yl(ethoxy)dimethylsilane (**P22**, 216 mg, 0.91 mmol), pentamethyldisiloxane (664 mg, 4.5 mmol), and dry hexane (3 ml) [15% isolated yield (66 mg)].  $^1\text{H}$  NMR (400 MHz,  $\text{CDCl}_3$ ):  $\delta$  7.94–7.87 (m, 1H), 7.85–7.79 (m, 1H), 7.52 (d, 1H,  $J = 0.8$  Hz), 7.33 (tt, 2H,  $J = 11.6, 1.6$  Hz), 0.45 (s, 6H), 0.08 (s, 9H), 0.07 (s, 6H);  $^{13}\text{C}$  NMR (101 MHz,  $\text{CDCl}_3$ ):  $\delta$  143.65, 141.64, 141.04, 131.18, 124.48, 124.12, 123.81, 122.44, 1.95, 1.75, 1.40; HRMS (EI+) calcd for  $[\text{C}_{15}\text{H}_{26}\text{O}_2\text{SSi}_3]^+ [\text{M}]^+$ : 354.0956, found: 354.0953.

## 4. Mechanistic Study:

### 4.1 Synthesis of $[\text{RhCl}(\text{Ph-BPE})_2]$ Crystals (**2**)

To a THF solution of  $[\text{RhCl}(\text{ethylene})_2]_2$  (80 mg, 0.205 mmol), (*S,S*)-Ph-BPE (208 mg, 0.41 mmol) in THF was slowly added. After 3 h of stirring at 22 °C, the reaction mixture was filtered through a syringe filter and a clear orange solution was obtained. Removal of the volatiles and trituration in hexanes followed by drying under vacuum gave orangish-yellow solids. Recrystallization in benzene and hexanes affords  $[\text{RhCl}(\text{Ph-BPE})_2]$  (**2**) as red crystals [85% isolated yield (0.218 g)]. Note that when  $[\text{RhCl}(\text{ethylene})_2]_2$  was used, the crystal form of **2** was obtained relatively easily.  $^1\text{H}$  NMR (400 MHz,  $\text{CDCl}_3$ ):  $\delta$  7.98 (d, 8H,  $J = 7.4$  Hz), 7.43 (t, 8H,  $J = 6.8$  Hz), 7.35–7.31 (m, 4H), 7.16–7.01 (m, 20H), 4.41–3.35 (m, 4H), 2.59–2.52 (m, 4H), 2.46–2.36 (m, 4H), 2.03–1.84 (m, 8H), 1.63–1.53 (m, 4H), 0.50–0.26 (m, 8H);  $^{31}\text{P}$  NMR ( $\text{CDCl}_3$ ):  $\delta$  106.0, 104.8.

### 4.2 Synthesis of $[\text{Rh}_2(\text{Ph-BPE})_2(\mu\text{-Cl})(\mu\text{-H})]$ (**5**)

$[\text{RhCl}(\text{Ph-BPE})_2]$  (**2**, 0.26 g, 0.2 mmol) and excess of  $\text{HSiMe}_2(\text{OEt})$  (**1**, 2.8 ml) in 10 ml of benzene was heated at 100 °C. The progress of the reaction was indicated by monitoring the decrease of  $[(\text{Ph-BPE})\text{Rh}(\mu\text{-Cl})_2]$  by  $^{31}\text{P}$  NMR. After all the  $[\text{RhCl}(\text{Ph-BPE})_2]$  disappeared, the volatiles were removed under vacuum to afford orange solids. The solids were washed with hexane twice and then dried under vacuum. Orange crystals were obtained by layering hexanes onto benzene solution [72% isolated yield (0.185 g)].  $^1\text{H}$  NMR ( $\text{C}_6\text{D}_6$ , 400 MHz):  $\delta$  8.02 (d, 8.0 Hz, 4H, *Ph*),

7.93 (d, 8.0 Hz, 4H, *Ph*), 7.51 (t, 7.6 Hz, 4H, *Ph*), 7.37 (t, 7.4 Hz, 2H, *Ph*), 6.95–7.23 (m, 22H, *Ph*), 6.93 (t, 7.4 Hz, 4H, *Ph*), 4.57 (m, 2H), 4.06 (m, 2H), 2.81 (m, 2H), 2.64 (m, 2H), 2.49 (m, 2H), 2.35 (m, 2H), 1.85–2.14 (m, 8H), 1.71 (br q, 4H), 0.80–0.95 (br m, 4H), 0.01 (m, 4H), -7.91 (br m, 1H, *RhH*);  $^{13}\text{C}$  NMR ( $\text{C}_6\text{D}_6$ , 100 MHz):  $\delta$  142.4 (d, 4.5 Hz), 140.9 (d, 3.8 Hz), 139.0 (d, 5.3 Hz), 138.3 (d, 3.8 Hz), 133.8 (s), 130.7 (d, 6.0 Hz), 130.0 (d, 7.6 Hz), 126.4 (d, 13.7 Hz), 125.6 (d, 1.5 Hz), 52.5 (d, 17.4 Hz), 51.5 (d, 24.3 Hz), 50.9 (d, 14.4 Hz), 50.3 (d, 17.5 Hz), 36.8 (d, 3.8 Hz), 36.2 (d, 6.8 Hz), 31.2 (d, 4.5 Hz), 29.6 (br t);  $^{31}\text{P}$  NMR ( $\text{C}_6\text{D}_6$ , 161.84 MHz):  $\delta$  103.8 (m), 102.6 (m), 99.9 (m), 98.8 (m).

### 4.3 Synthesis of $[(\text{Ph-BPE})\text{Rh}(\mu\text{-H})]_2$ (**6**)

To a benzene solution of  $[\text{RhCl}(\text{Ph-BPE})]_2$  (**2**, 13 mg, 0.01 mmol), 20  $\mu\text{L}$  of 1 M  $\text{LiHBEt}_3$  in THF (0.02 mmol) was added. The reaction mixture was heated at 60  $^\circ\text{C}$  until all the  $[\text{RhCl}(\text{Ph-BPE})]_2$  and  $[\text{Rh}_2(\text{Ph-BPE})_2(\mu\text{-Cl})(\mu\text{-H})]$  disappeared by  $^{31}\text{P}$  NMR (five days). After filtration through celite, the volatiles were removed under vacuum. Washing with hexanes twice afforded dark green solids. The crystals were obtained in hexane at -35  $^\circ\text{C}$ .  $^1\text{H}$  NMR (400 MHz,  $\text{CDCl}_3$ ):  $\delta$  8.34 (d,  $J = 7.6$  Hz, 4H, *Ph*), 7.45–7.51 (m, 6H, *Ph*), 7.30 (d, 6H, *Ph*), 7.22 (t, 7.4 Hz, 4H, *Ph*), 7.15 (br, 6H, *Ph*), 6.97–7.10 (m, 14H, *Ph*), 4.27 (m, 4H), 2.67 (m, 4H), 2.26 (m, 4H), 1.82–2.21 (m, 8H), 1.69 (m, 4H), 0.85 (m, 4H), -0.39 (m, 4H), -4.23 (br, 2H, *Rh-H*);  $^{13}\text{C}$  NMR ( $\text{C}_6\text{D}_6$ , 100 MHz):  $\delta$  141.8 (s), 141.7 (s), 138.7 (s), 130.8 (s), 128.6 (s), 126.7 (s), 125.6 (s), 50.9 (br), 50.4 (s), 36.6 (s), 34.9 (s), 30.9 (s), 29.4 (s), 26.4 (s), 25.6 (s), 18.9 (s), 11.6 (s);  $^{31}\text{P}$  NMR ( $\text{CDCl}_3$ ):  $\delta$  106.6 (m), 105.5 (m).

### 4.4 Identifying resting state of the catalyst

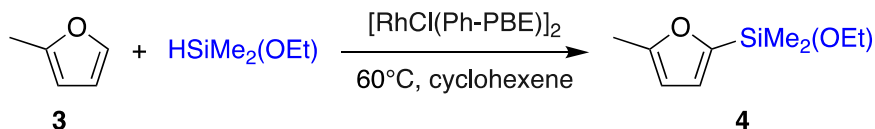

In a  $\text{N}_2$ -filled glovebox, a stock solution containing 2-methylfuran,  $\text{HMe}_2\text{Si}(\text{OEt})$ , cyclohexene, and THF was placed in J-Young tube and cooled in a -35  $^\circ\text{C}$  fridge. Then, a stock solution of catalyst **2** in THF was added to the same J-Young tube, quickly taken out of the glove box, and cooled at

-78 °C. The tube was allowed to thaw and was shaken before it was placed in the NMR instrument with the temperature set at 60 °C. Conversion of the catalyst state was monitored by  $^{31}\text{P}$  NMR.

$^{31}\text{P}$  NMR after 0 h

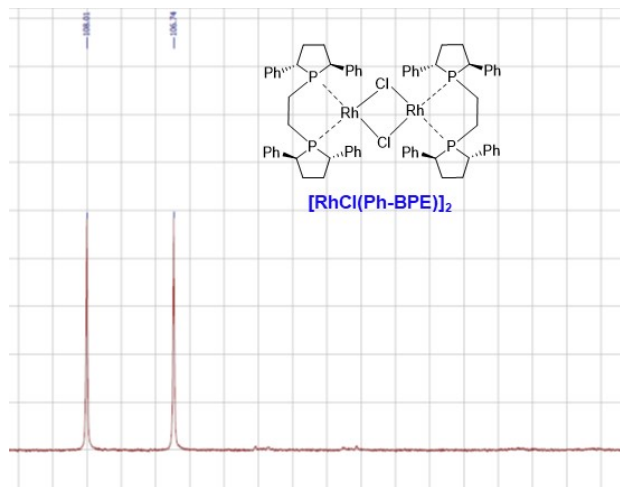

$^{31}\text{P}$  NMR after 1 h at 60 °C

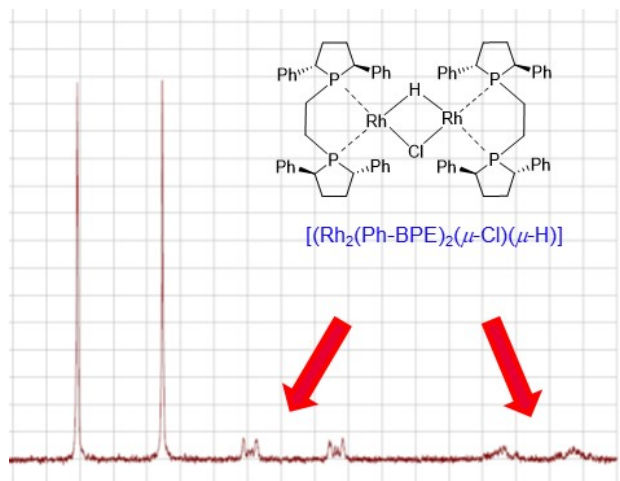

#### 4.5 Determination of Reaction Order in [Furan], [HSi] and [Cat]

In order to determine the reaction order, the reactions between 2-methylfuran and  $\text{HSiMe}_2(\text{OEt})$  were carried out with various concentration of components. Initial rate laws were used to determine the reaction rate. The reactions were carried out in THF. The progress of the reaction was monitored by GC-MS using decane as an internal standard.

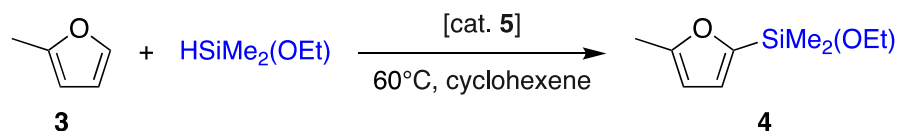

$$\text{Rate} = k_r [\text{2-methylfuran}][\text{HMe}_2\text{Si(OEt)}][\text{cat. 5}][\text{cyclohexene}]$$

**Table S6.** Reaction Rate as a function of [2-methylfuran], [Si-H] and [cat. 5]

| Entry | [2-methylfuran] | [Si-H] | [cat. 5] | [cyclohexene] | Rate (M/min)         |
|-------|-----------------|--------|----------|---------------|----------------------|
| 1     | 0.66 M          | 0.60 M | 3 mM     | 0.66 M        | 2.1X10 <sup>-4</sup> |
| 2     | 1.32 M          | 0.60 M | 3 mM     | 0.66 M        | 4.5X10 <sup>-4</sup> |
| 3     | 1.98 M          | 0.60 M | 3 mM     | 0.66 M        | 6.4X10 <sup>-4</sup> |
| 4     | 0.66 M          | 1.20 M | 3 mM     | 0.66 M        | 2.4X10 <sup>-4</sup> |
| 5     | 0.66 M          | 1.80 M | 3 mM     | 0.66 M        | 2.5X10 <sup>-4</sup> |
| 6     | 0.66 M          | 0.60 M | 1.5 mM   | 0.66 M        | 1.1X10 <sup>-4</sup> |
| 7     | 0.66 M          | 0.60 M | 6 mM     | 0.66 M        | 3.7X10 <sup>-4</sup> |

**Graph 1.** Reaction Rate vs. [2-methylfuran]

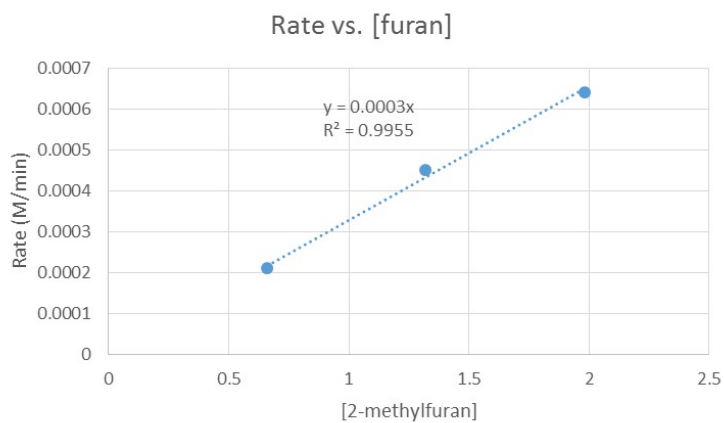

**Graph 2.** Reaction Rate vs. [HMe<sub>2</sub>Si(OEt)]

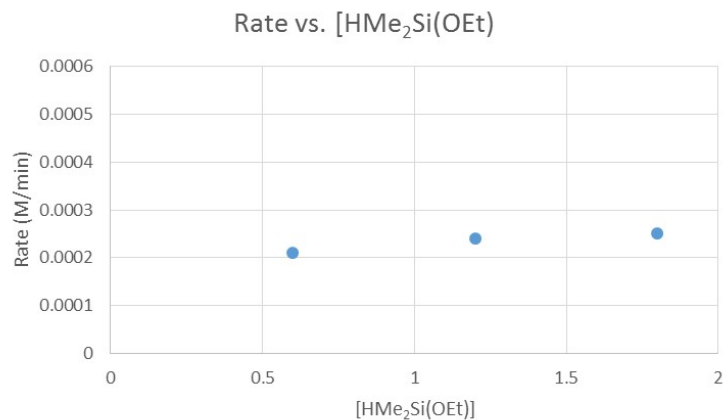**Graph 3.** Reaction Rate vs. [cat. 5]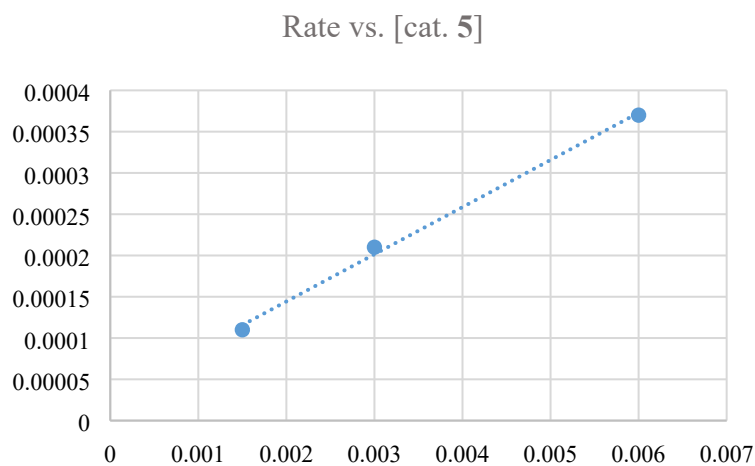**Table S7.** Reaction Rate as a function of [cyclohexene]

| Entry | [2-methylfuran] | [Si-H] | [cat. 5] | [cyclohexene] | Rate (M/min)         |
|-------|-----------------|--------|----------|---------------|----------------------|
| 1     | 0.66 M          | 0.60 M | 3 mM     | 0.66 M        | 2.1X10 <sup>-4</sup> |
| 8     | 0.66 M          | 0.60 M | 3 mM     | 0.18 M        | 1.3X10 <sup>-4</sup> |
| 9     | 0.66 M          | 0.60 M | 3 mM     | 0.36 M        | 1.7X10 <sup>-4</sup> |
| 10    | 0.66 M          | 0.60 M | 3 mM     | 0.90 M        | 2.1X10 <sup>-4</sup> |
| 11    | 0.66 M          | 0.60 M | 3 mM     | 1.20 M        | suppressed           |
| 12    | 0.66 M          | 0.60 M | 3 mM     | 1.50 M        | suppressed           |
| 13    | 0.66 M          | 0.60 M | 3 mM     | 1.80 M        | suppressed           |



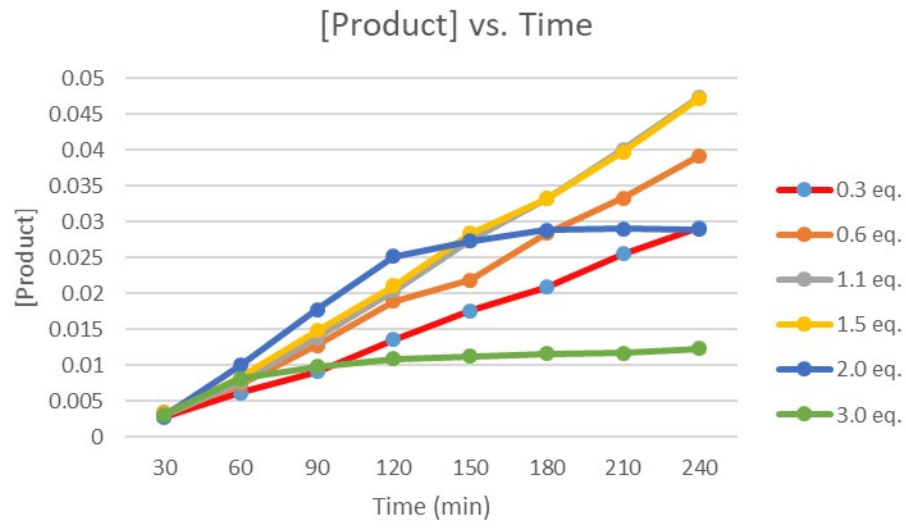

## 5. NMR Spectra

### 5.1 C–H Silylation Products

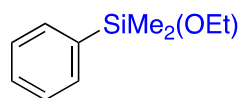

$^1\text{H}$  NMR of **P2**

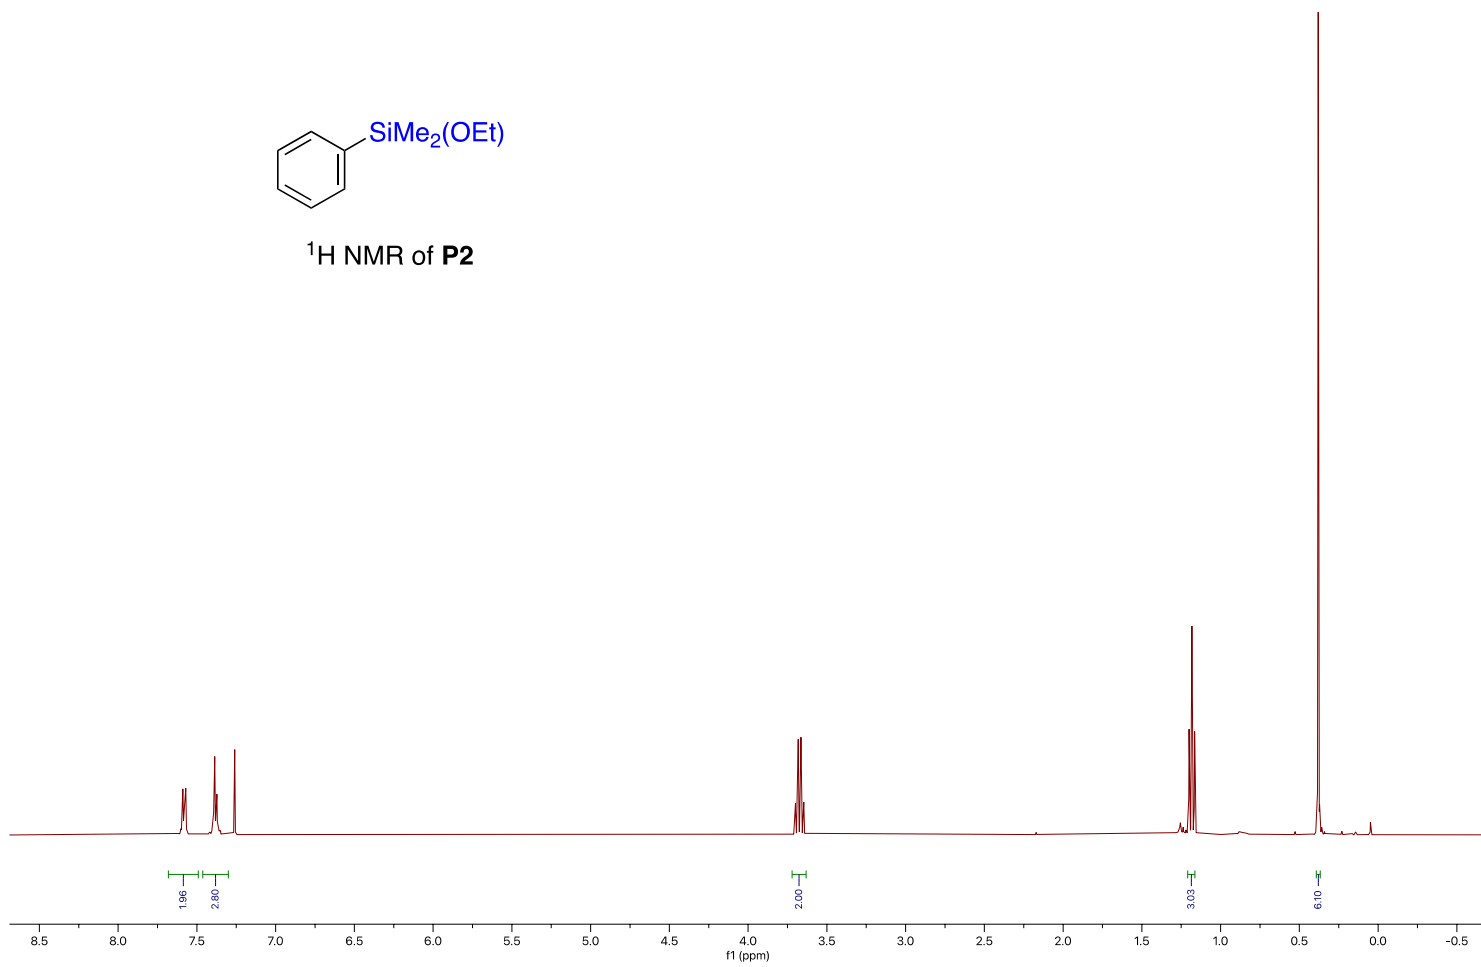

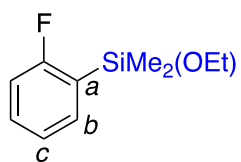

$^1\text{H}$  NMR of **P2** ( $a:b:c=5.5:4.1:1$ )

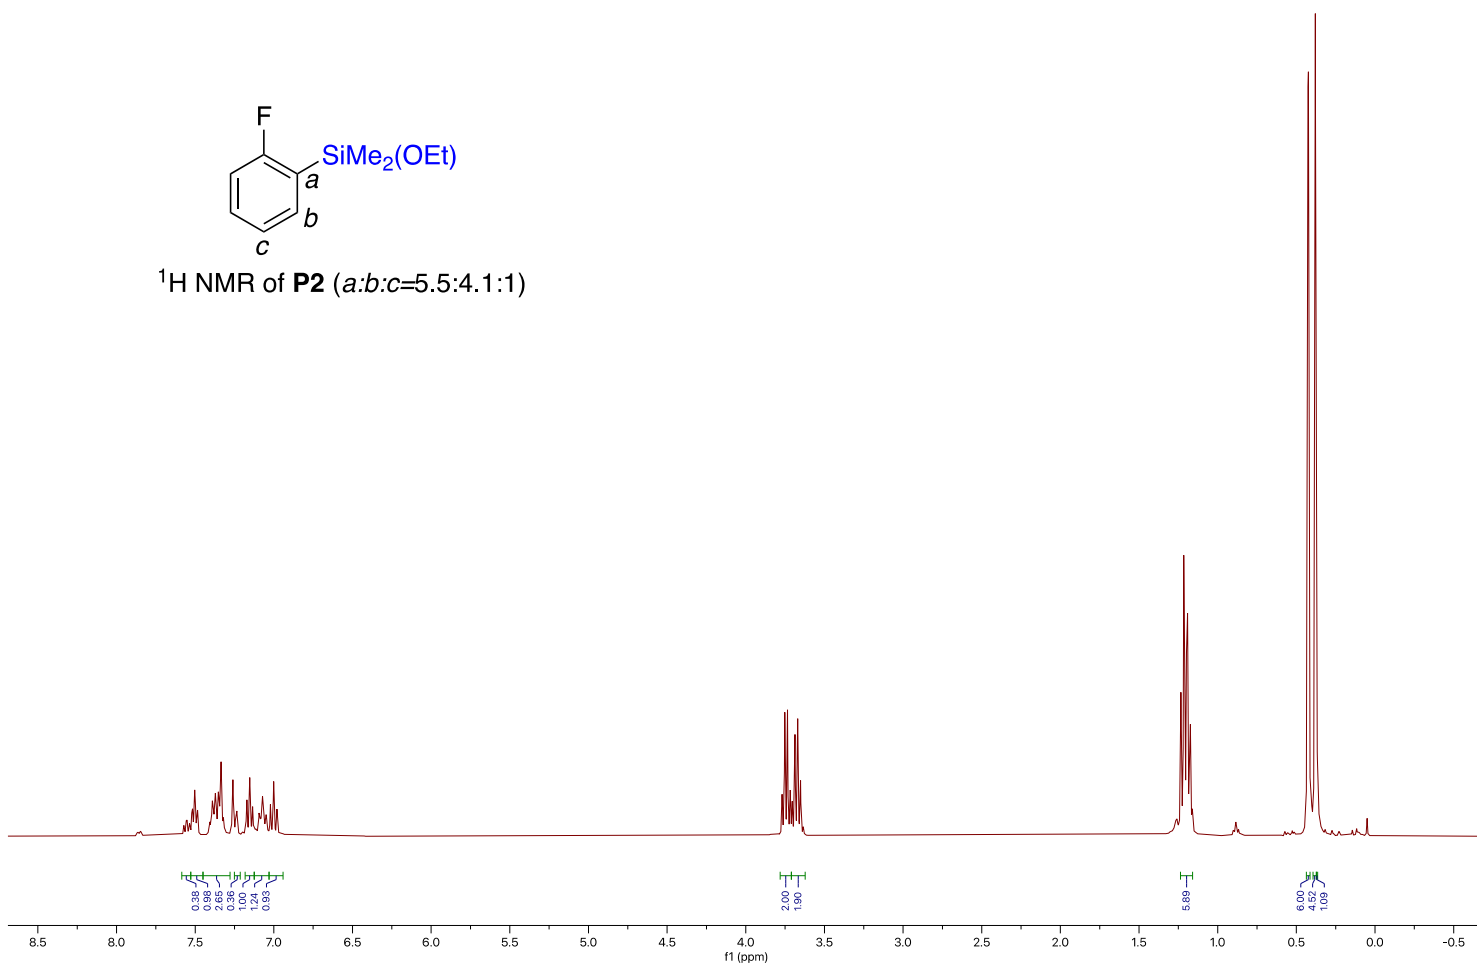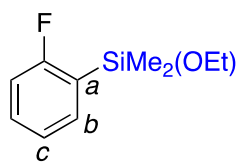

$^{13}\text{C}$  NMR of **P2** ( $a:b:c=5.5:4.1:1$ )

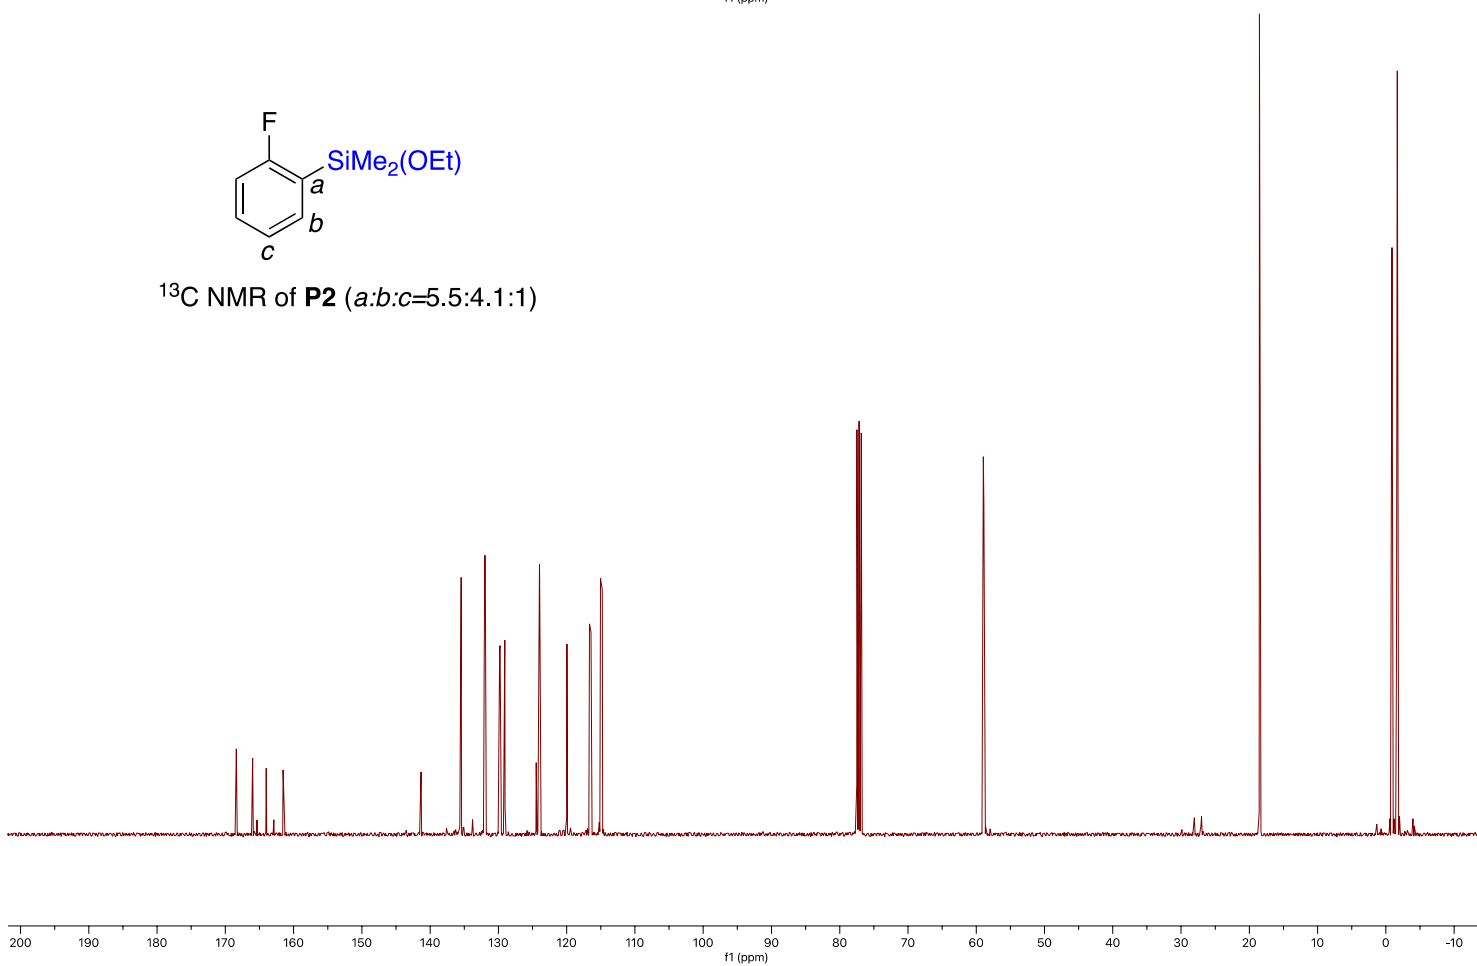

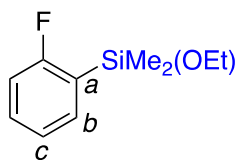

$^{19}\text{F}$  NMR of **P2** ( $a:b:c=5.5:4.1:1$ )

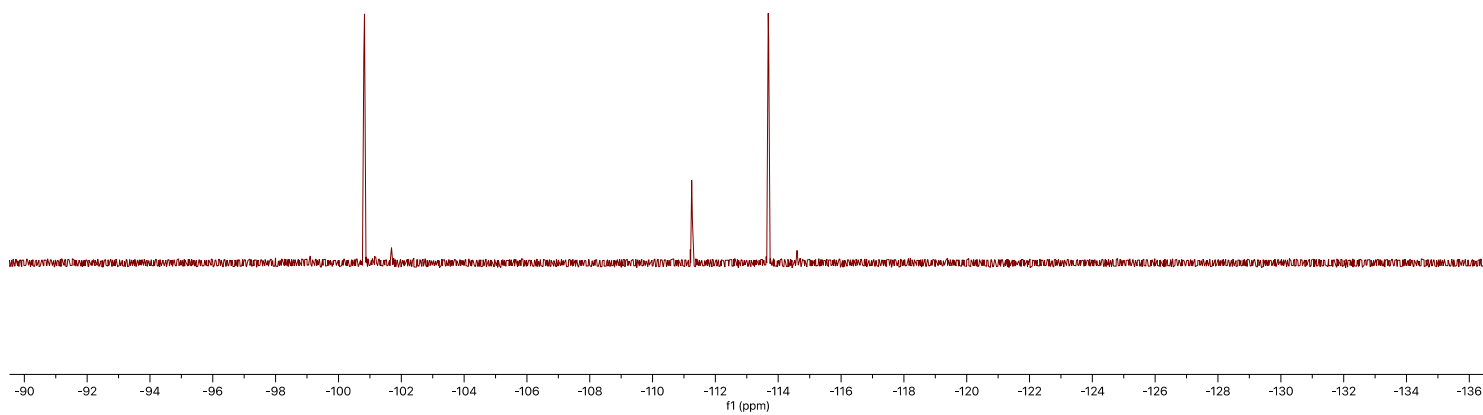

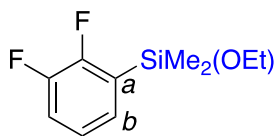

$^1\text{H}$  NMR of **P3** ( $a:b=2.6:1$ )

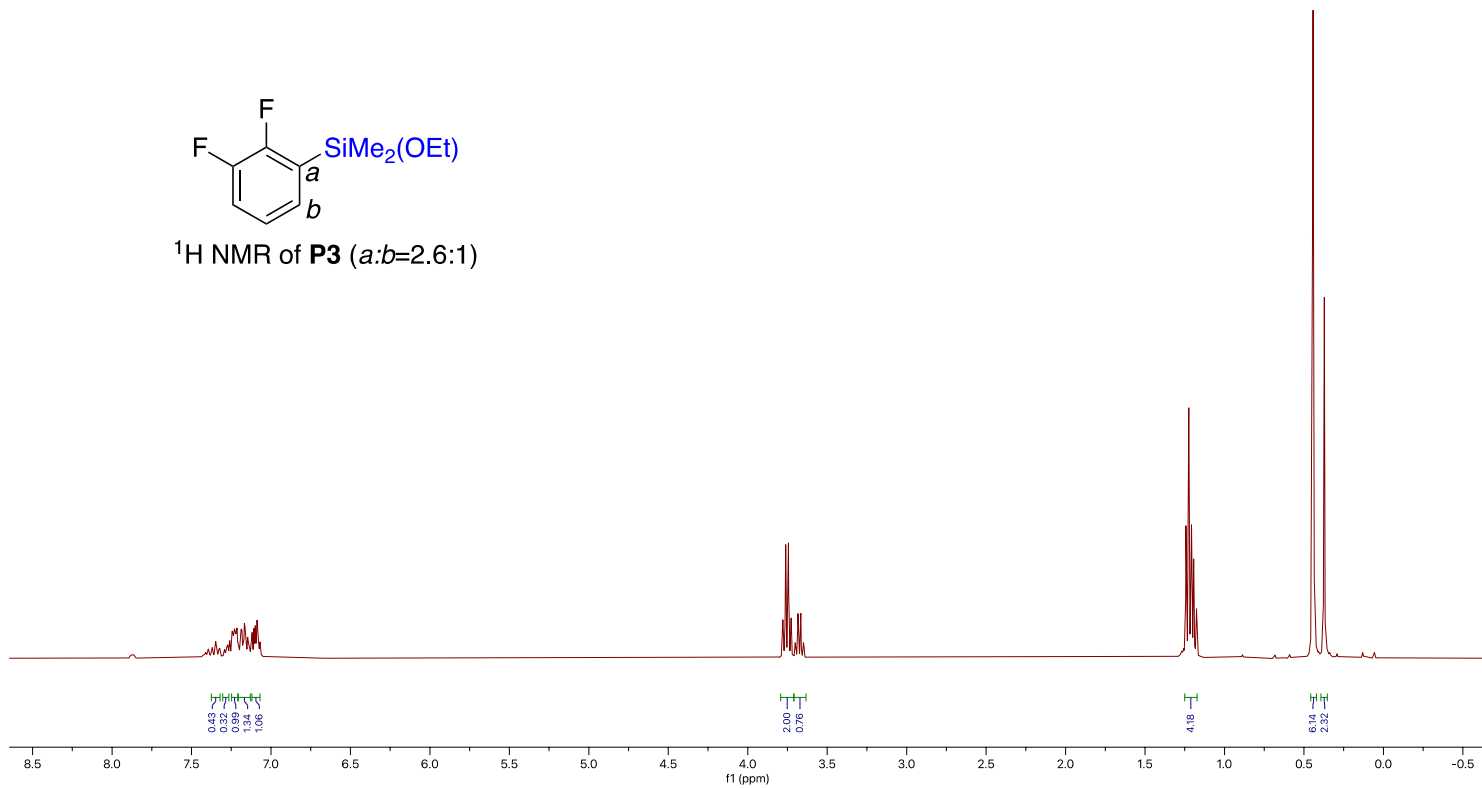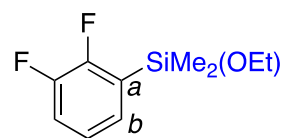

$^{13}\text{C}$  NMR of **P3** ( $a:b=2.6:1$ )

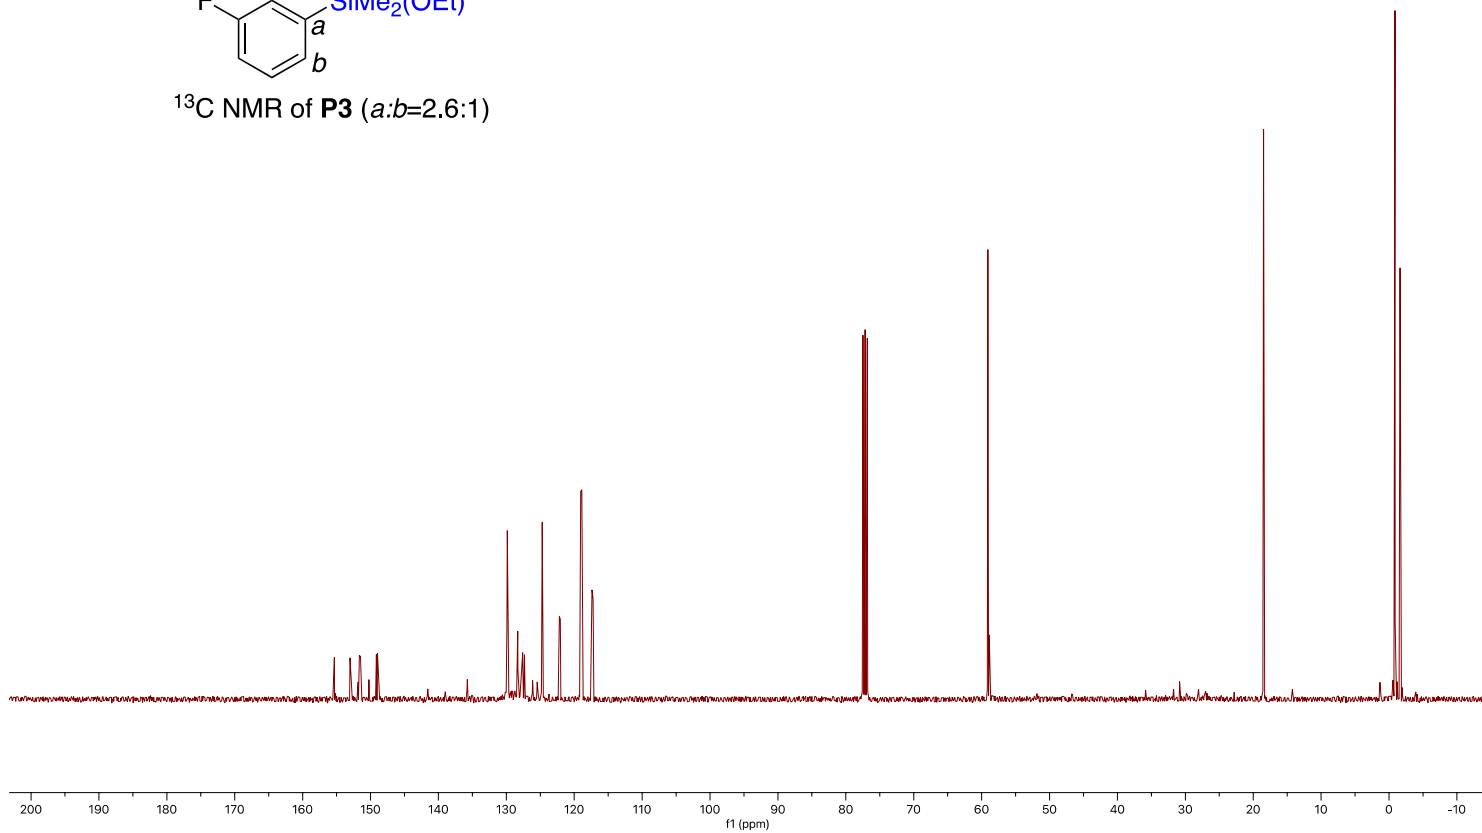

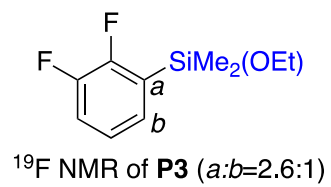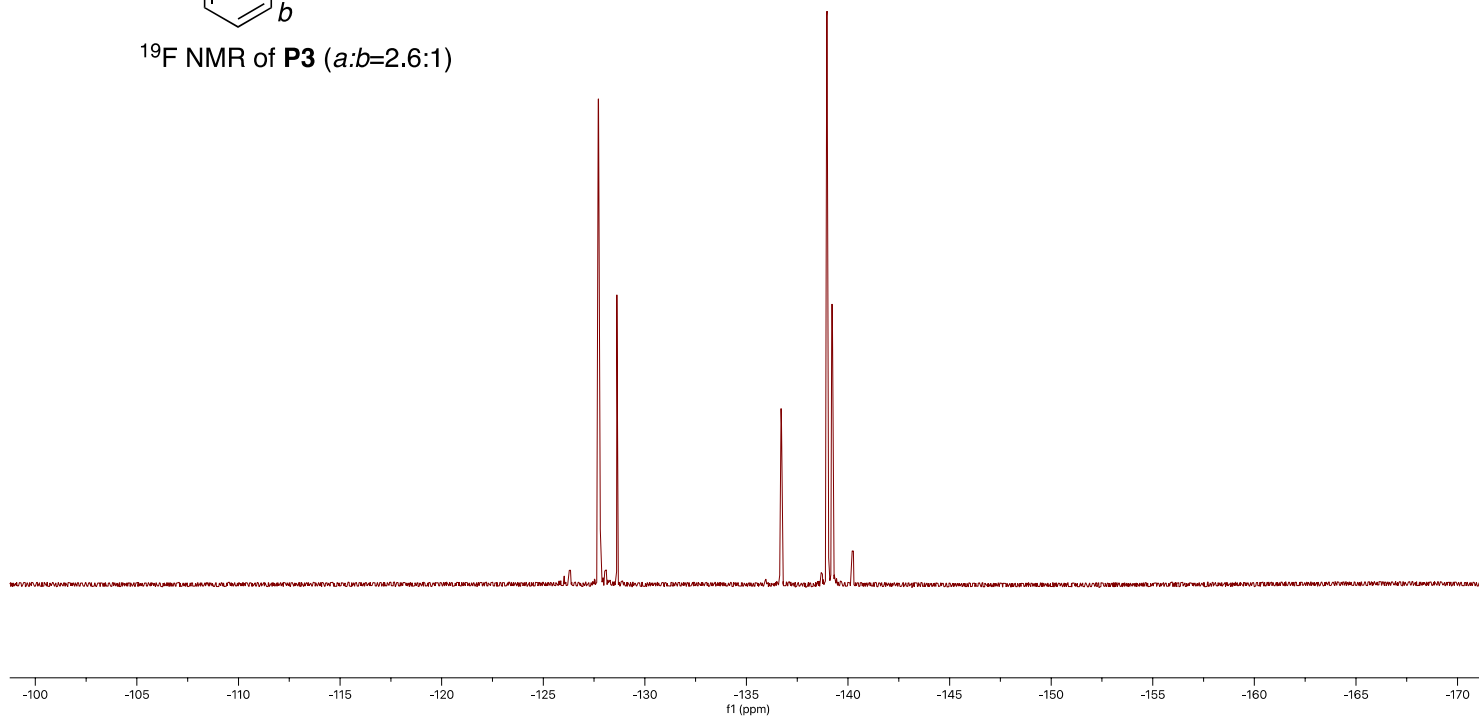

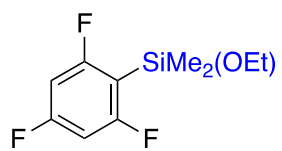 $^1\text{H}$  NMR of P4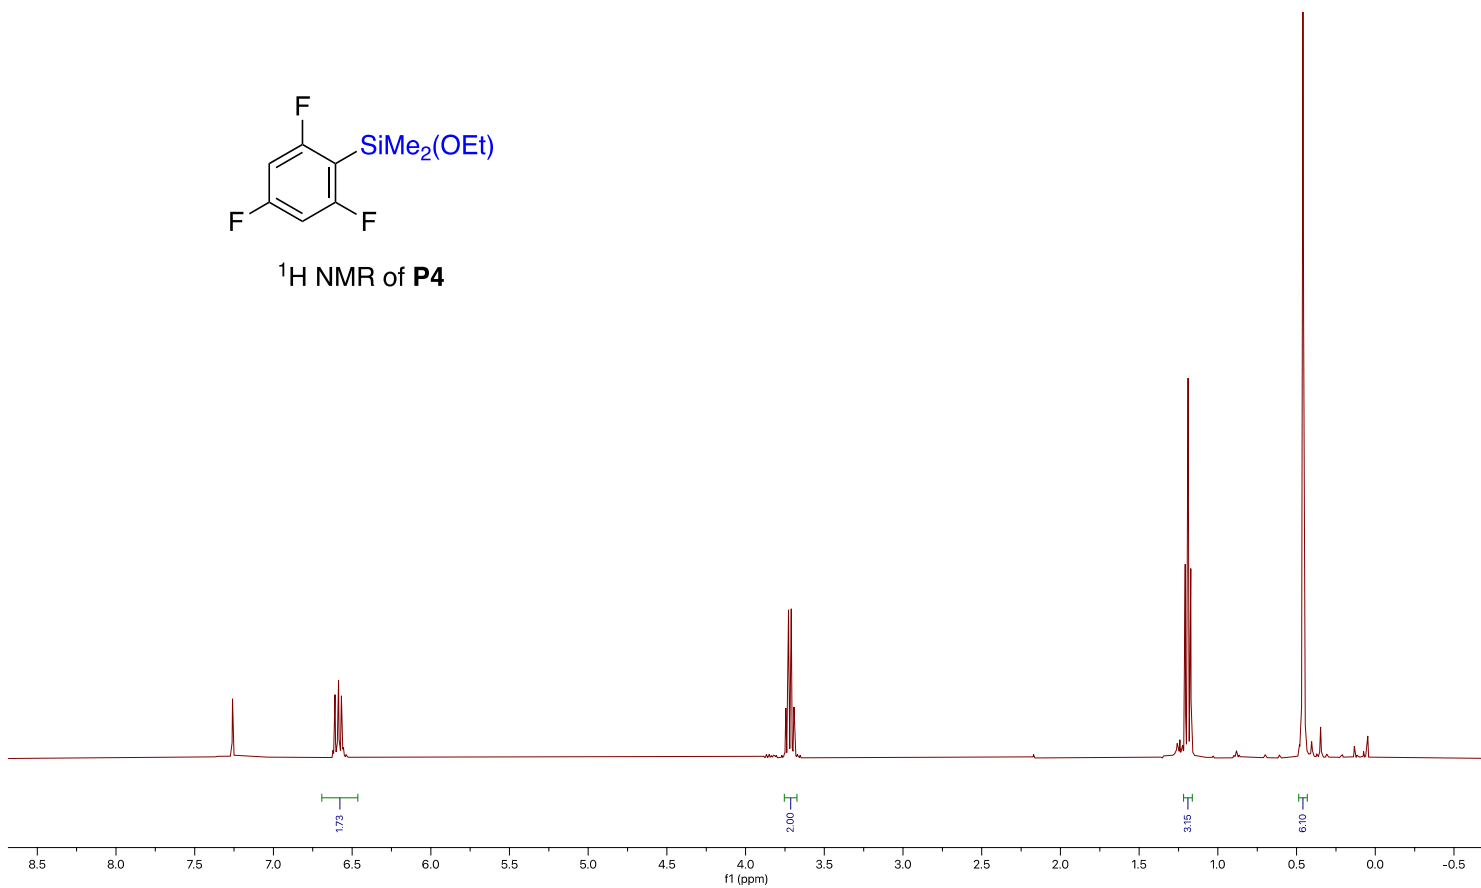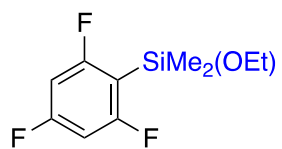 $^{13}\text{C}$  NMR of P4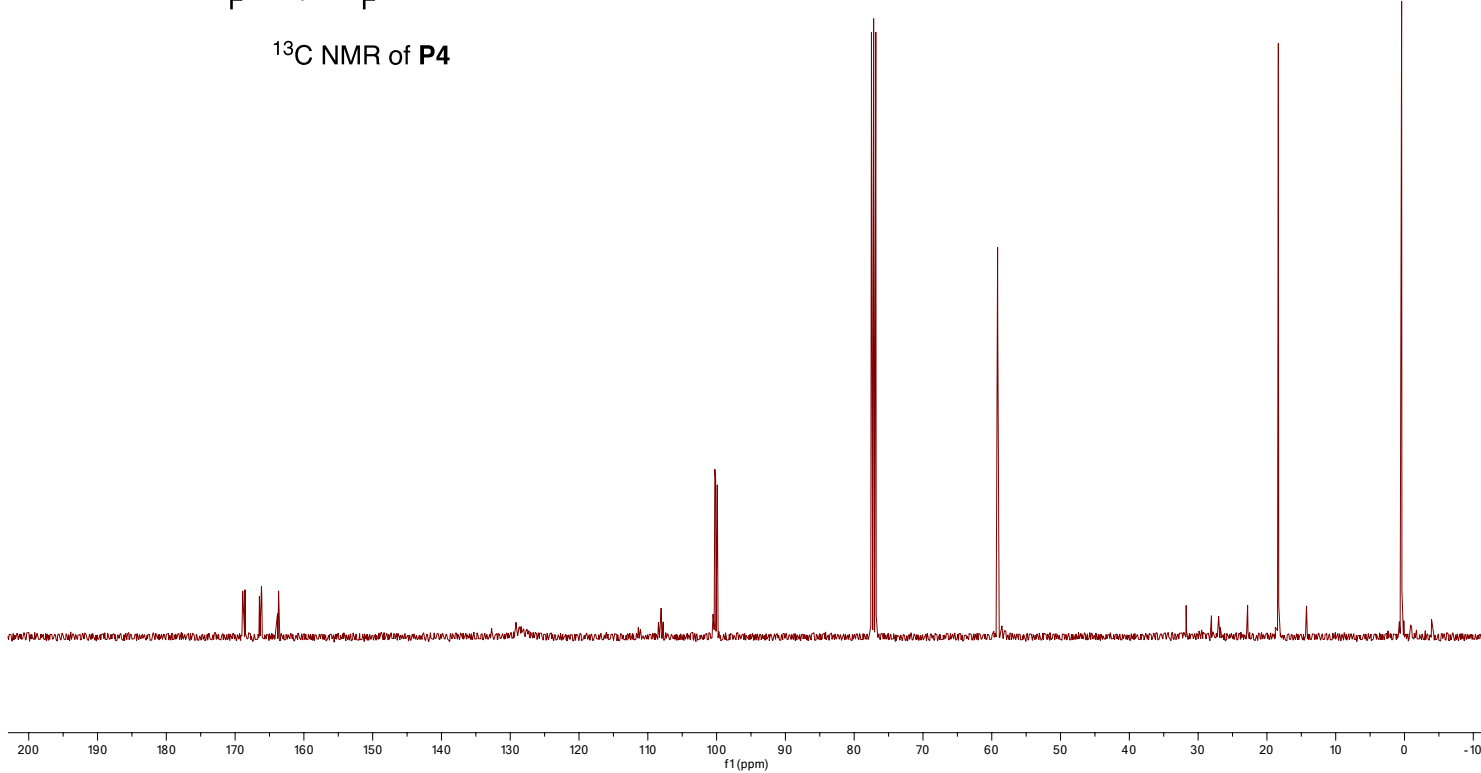

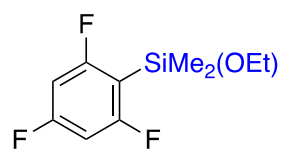<sup>19</sup>F NMR of P4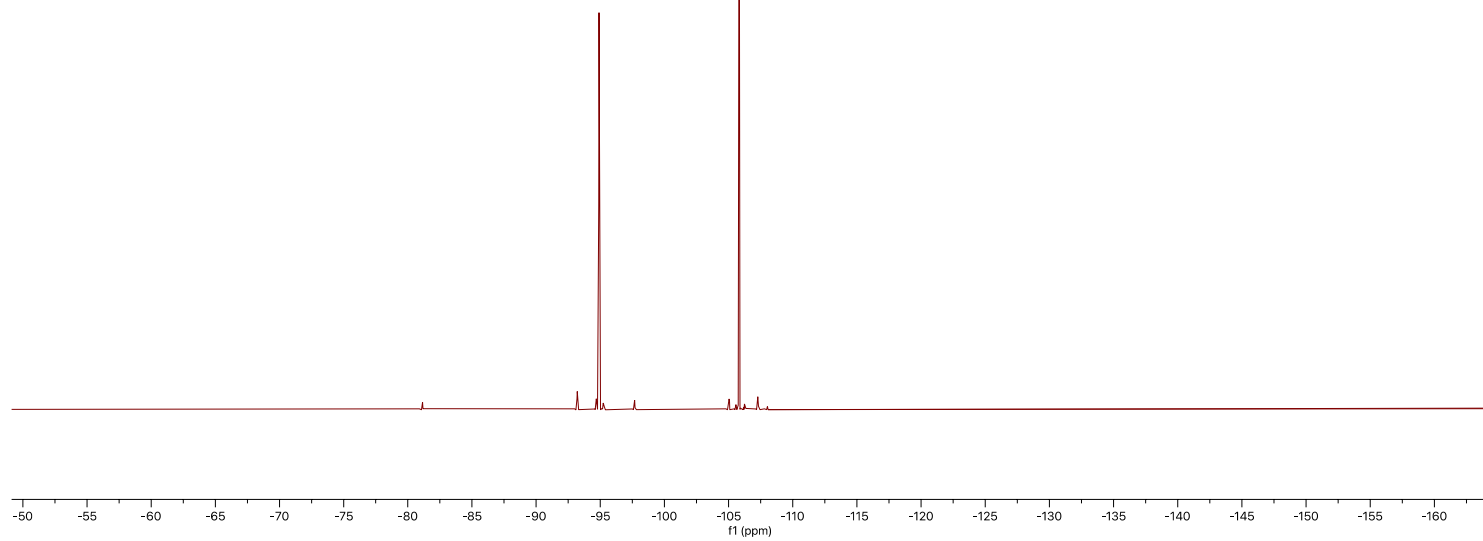



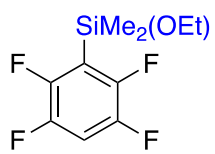 $^1\text{H}$  NMR of P5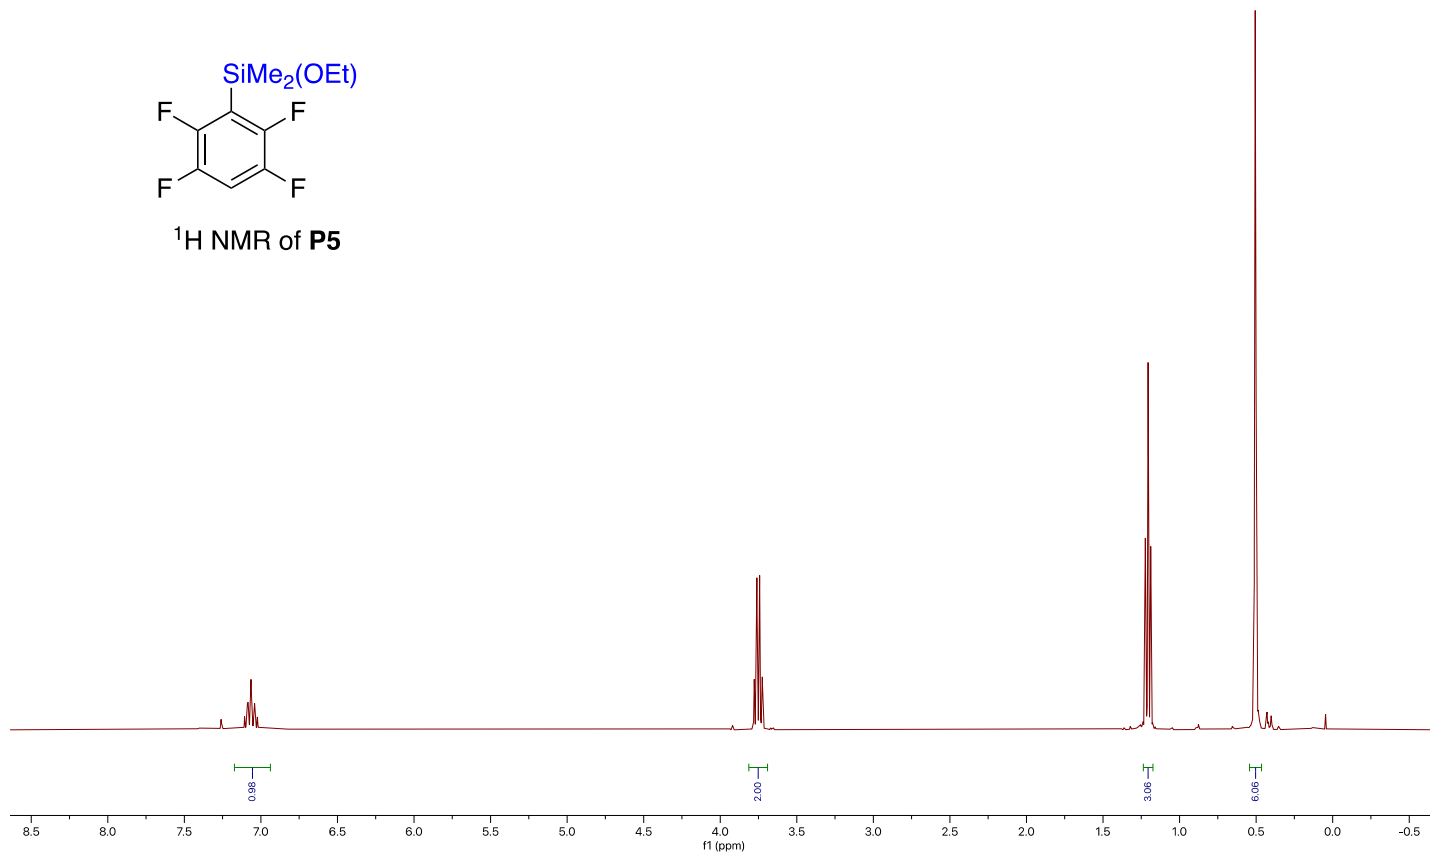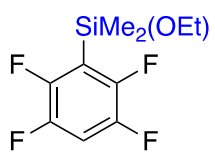 $^{13}\text{C}$  NMR of P5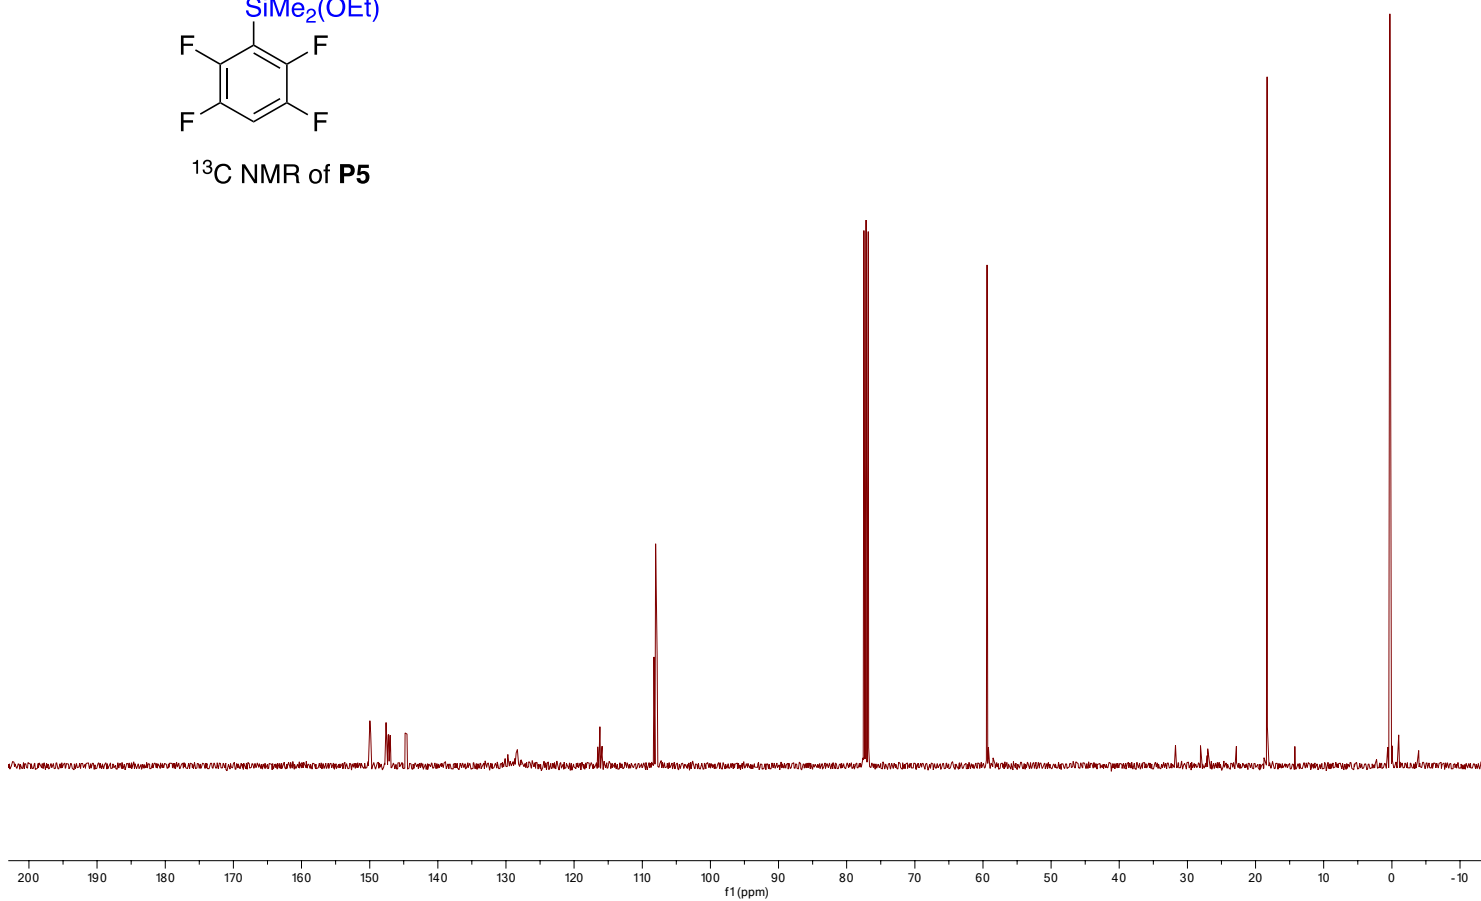

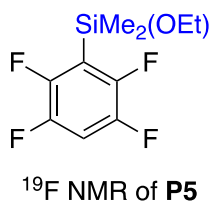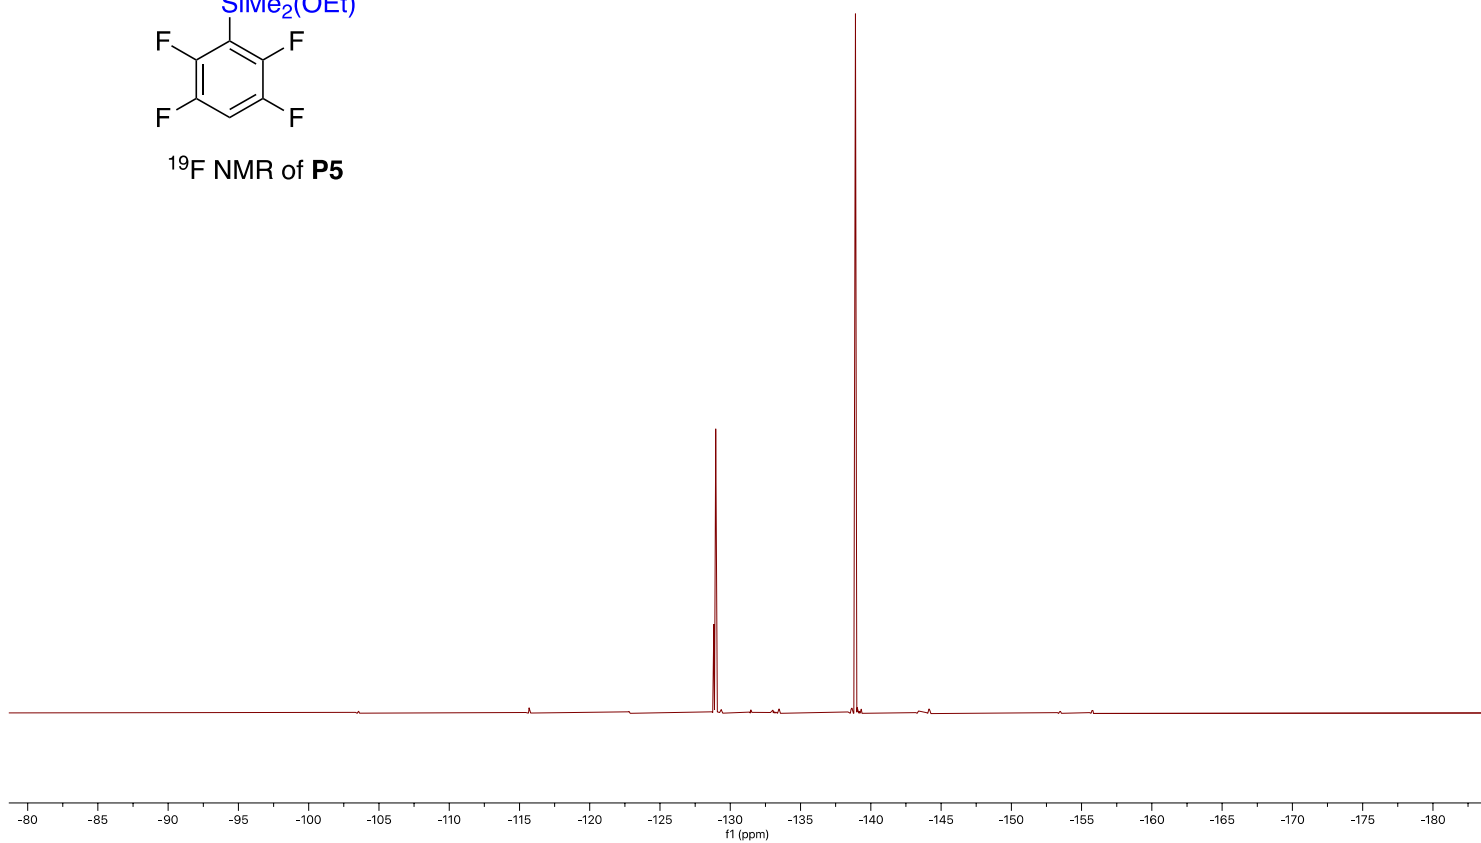

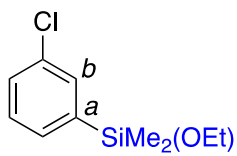 $^1\text{H}$  NMR of **P6** ( $a:b=6.7:1$ )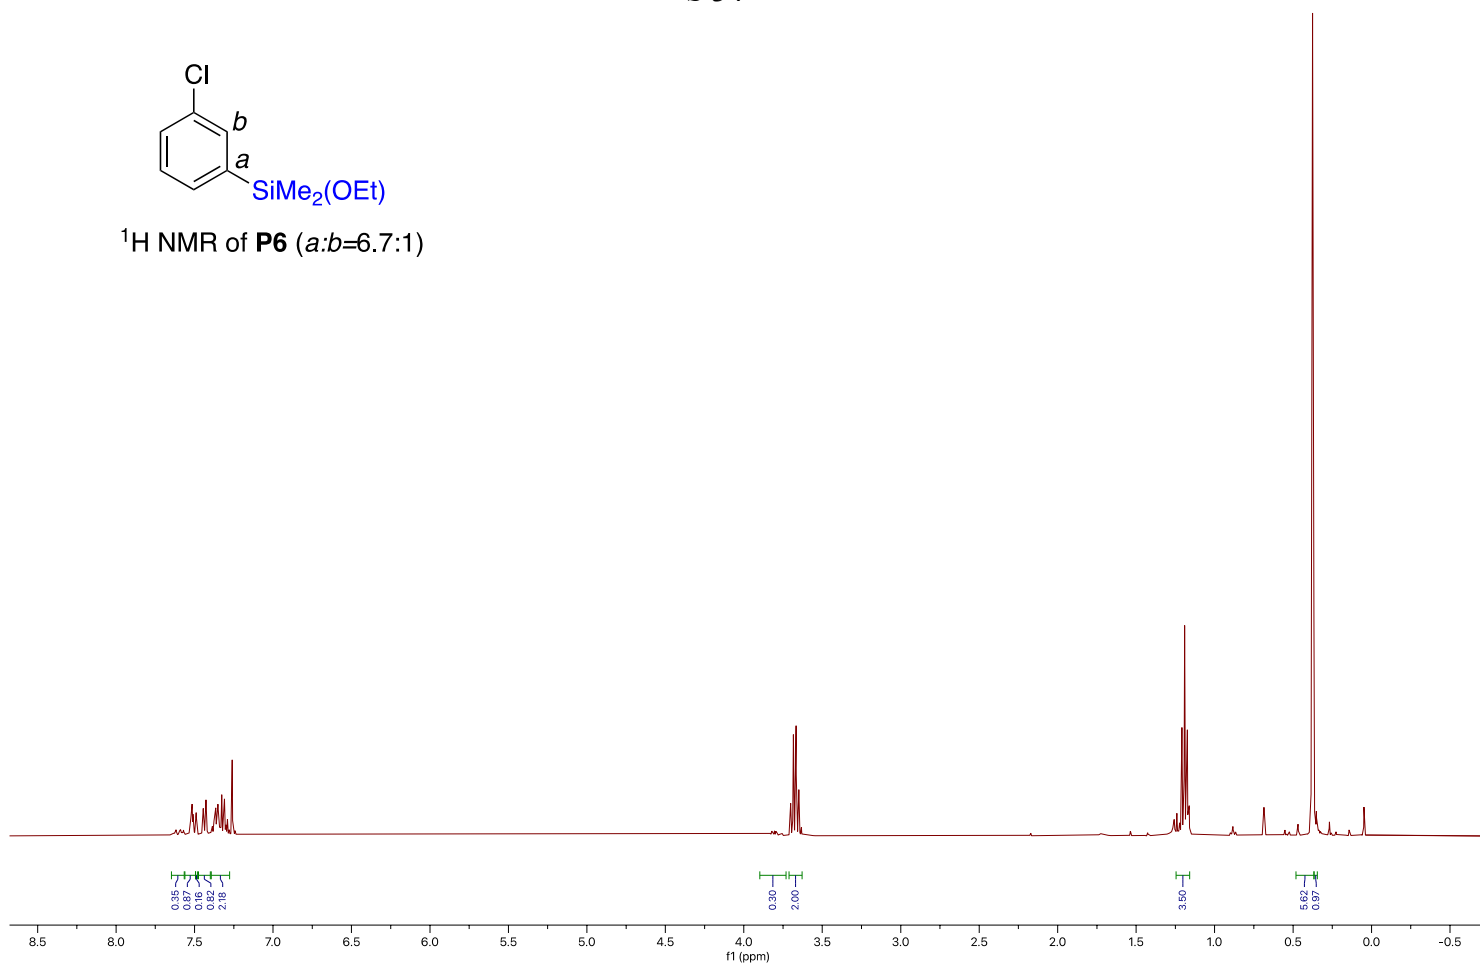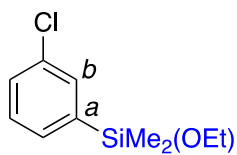 $^{13}\text{C}$  NMR of **P6** ( $a:b=6.7:1$ )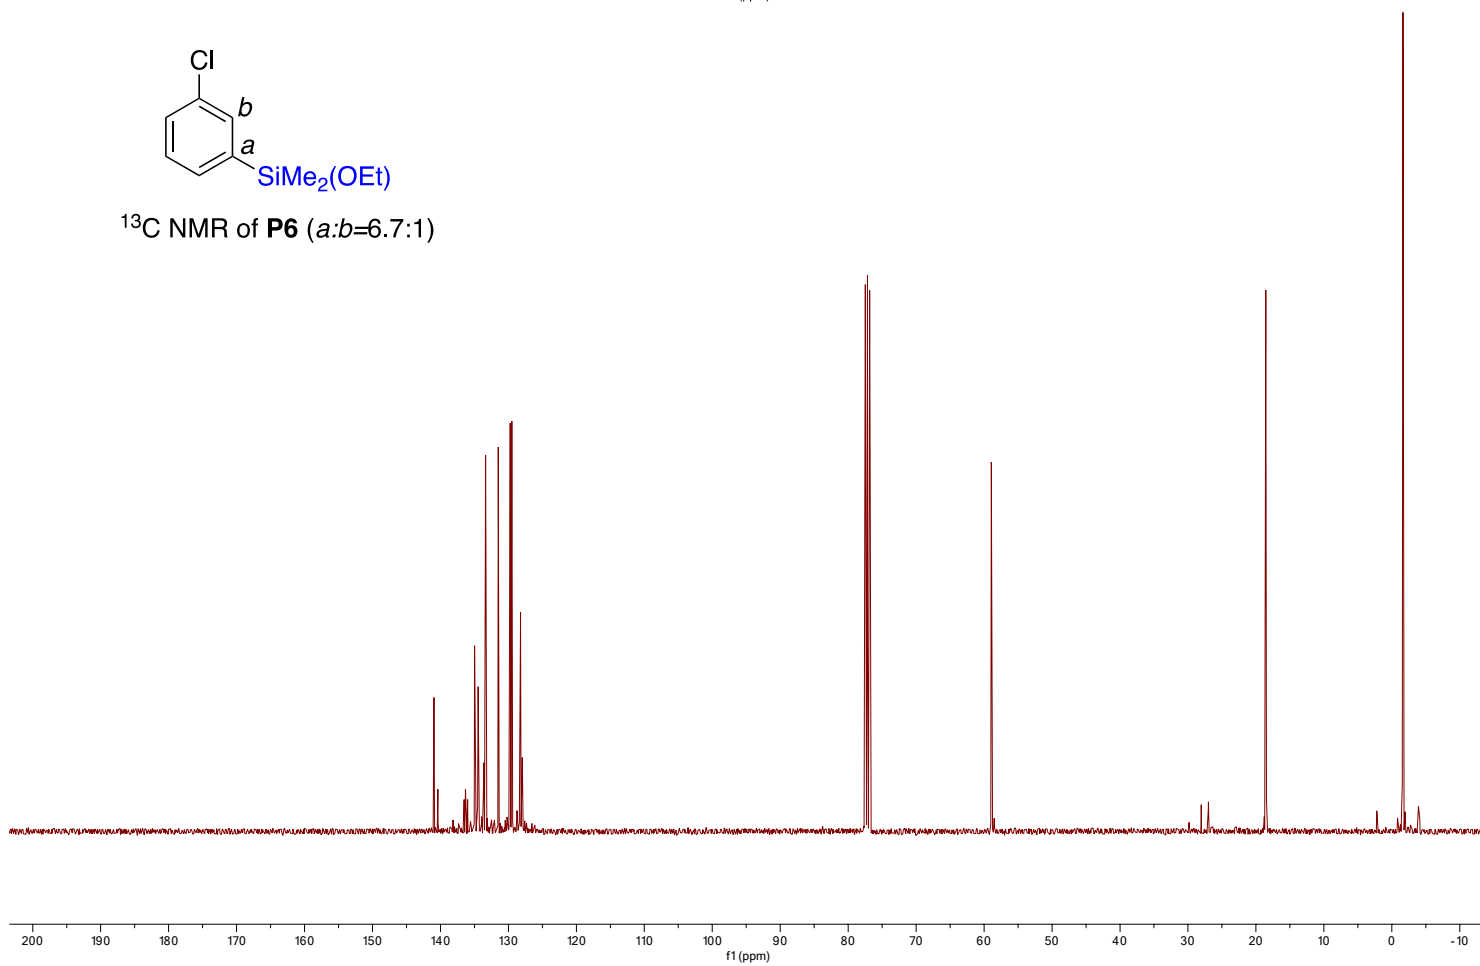

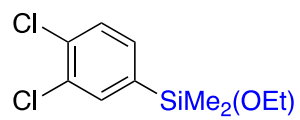<sup>1</sup>H NMR of P7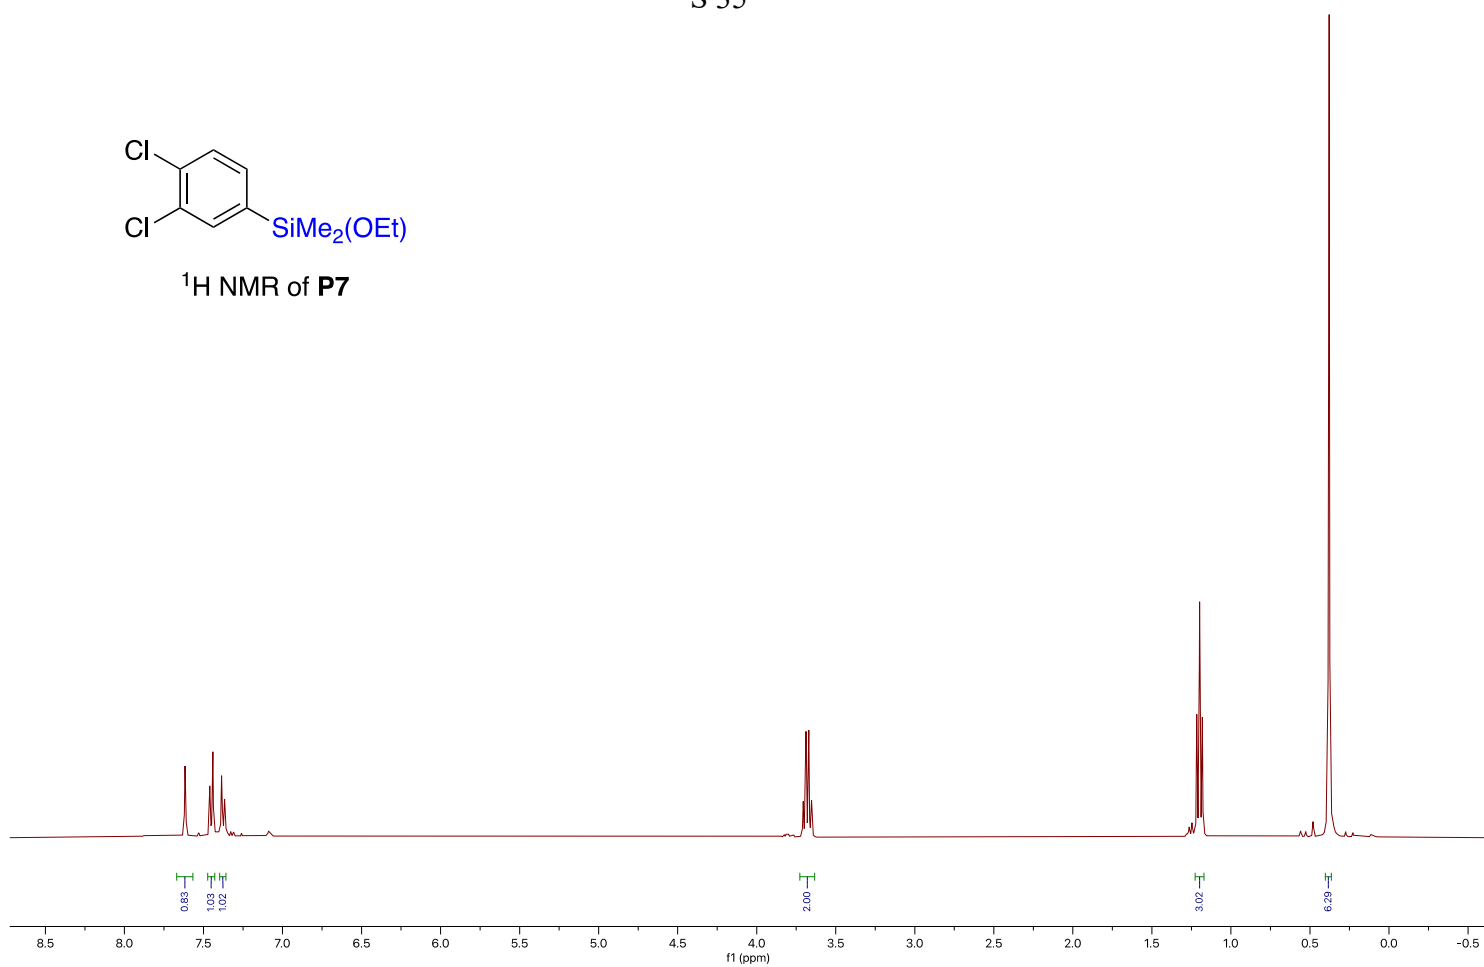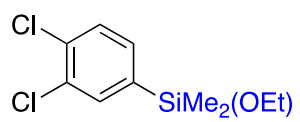<sup>13</sup>C NMR of P7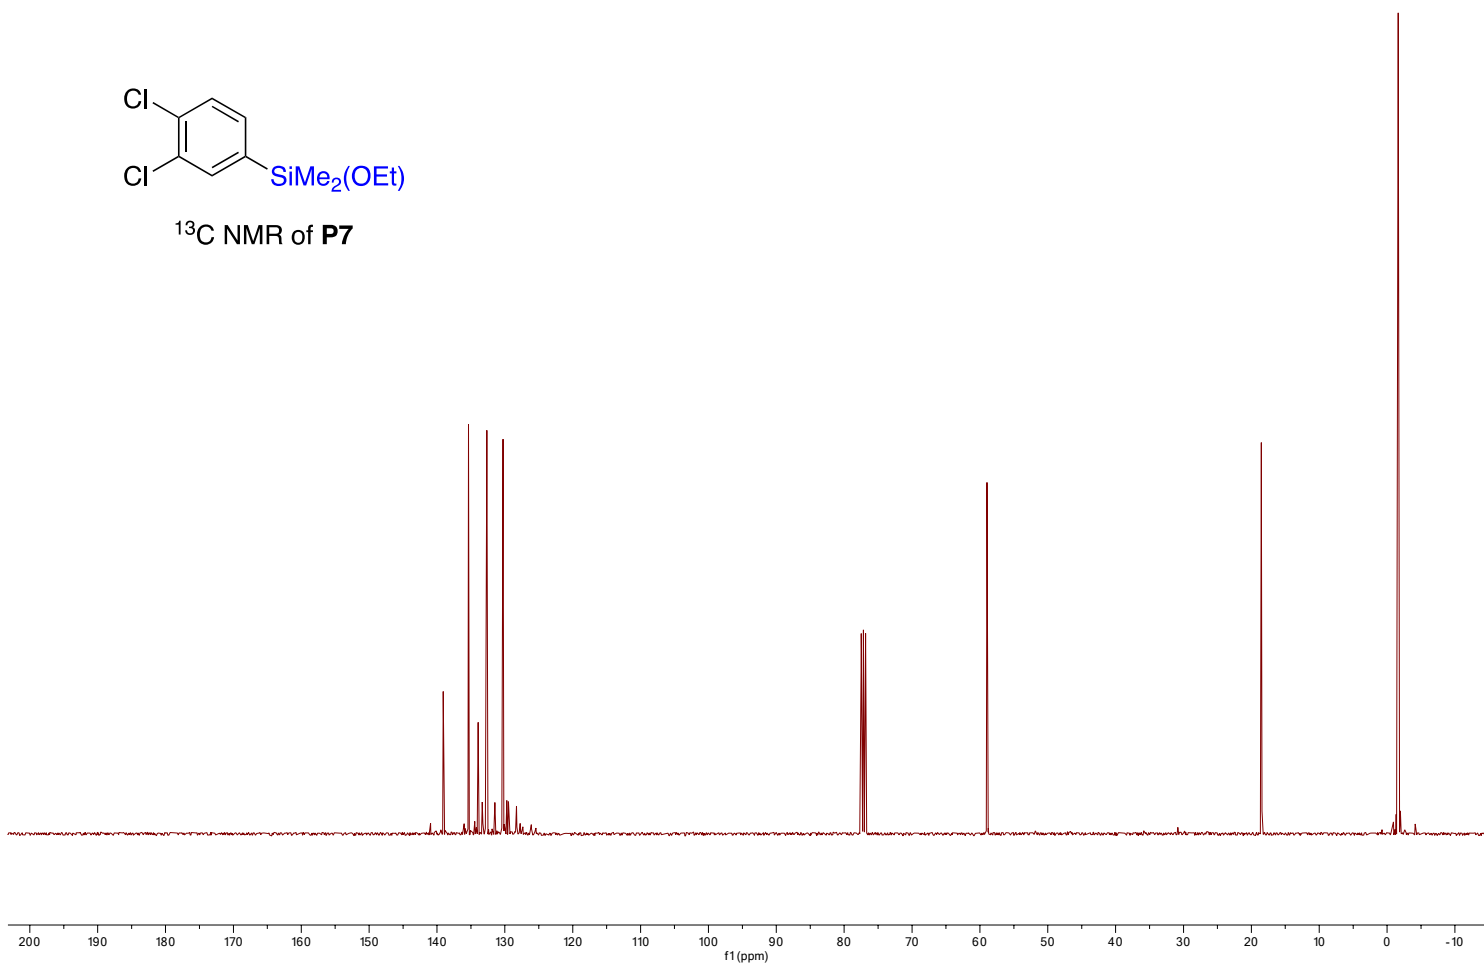

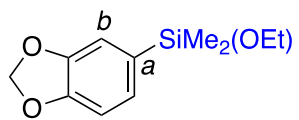<sup>13</sup>C NMR of P8 (*a*:*b*=8.3:1)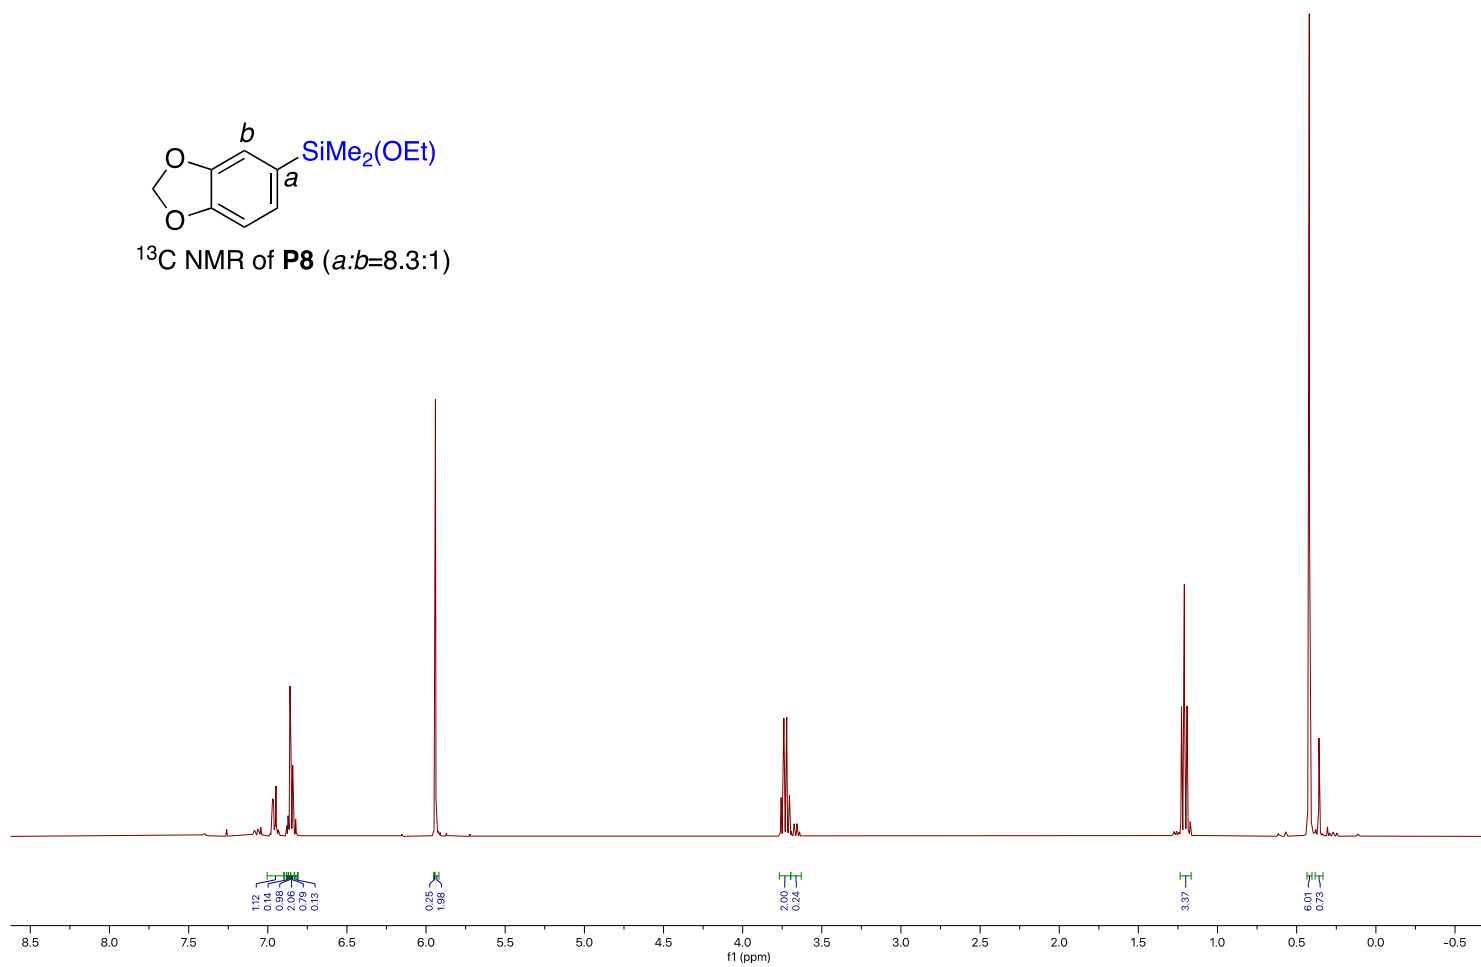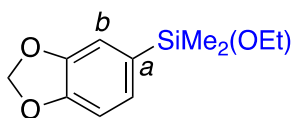<sup>1</sup>H NMR of P8 (*a*:*b*=8.3:1)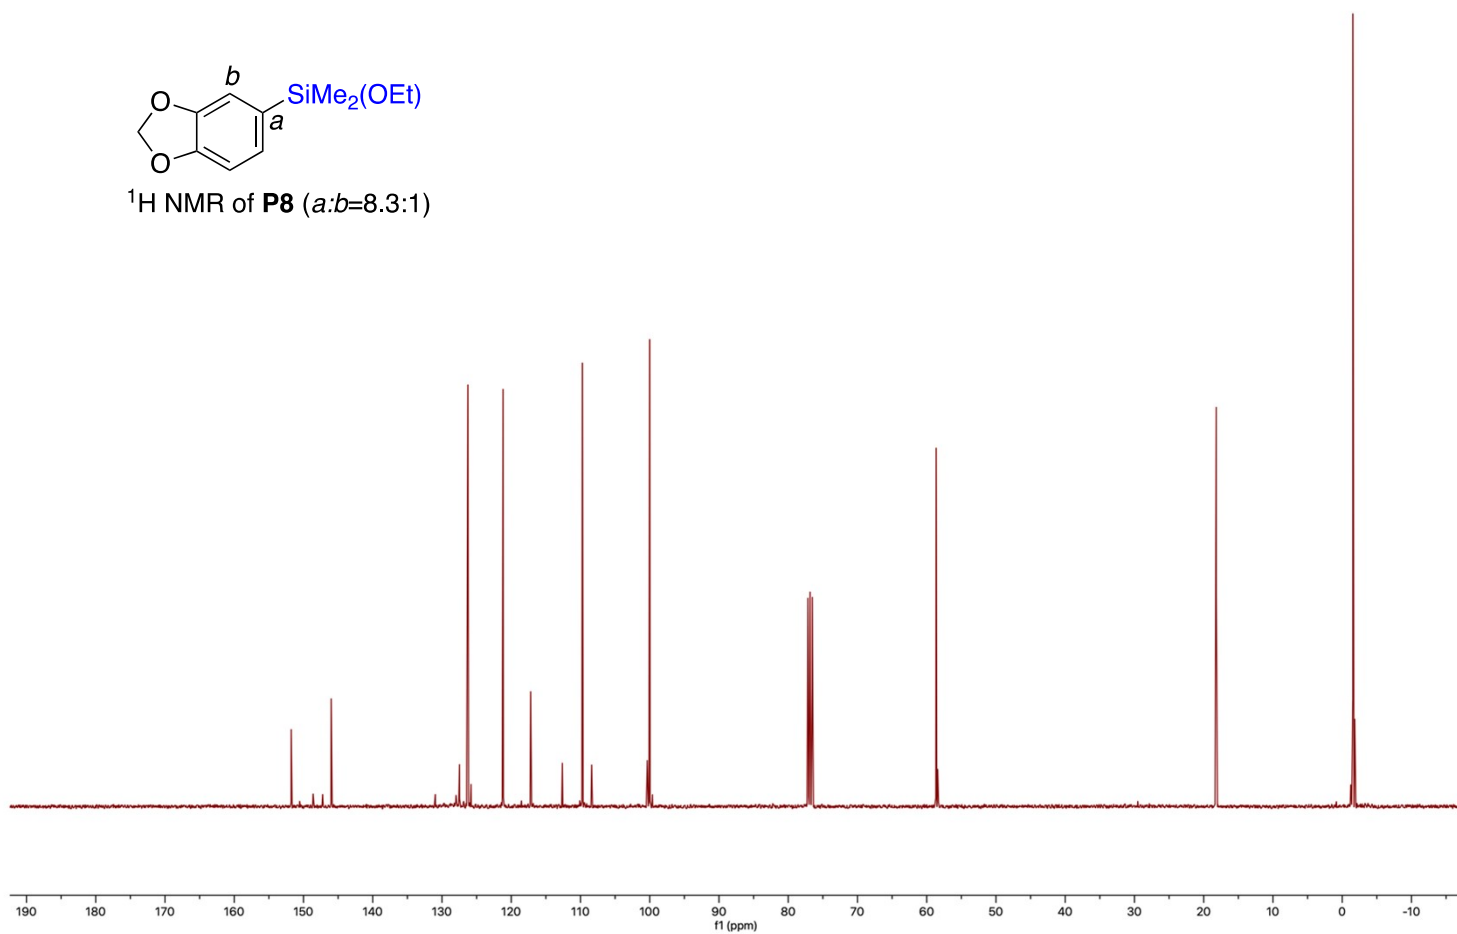

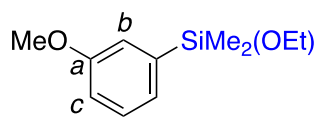

$^1\text{H}$  NMR of **P9** ( $a:b:c=4.8:1.3:1$ )

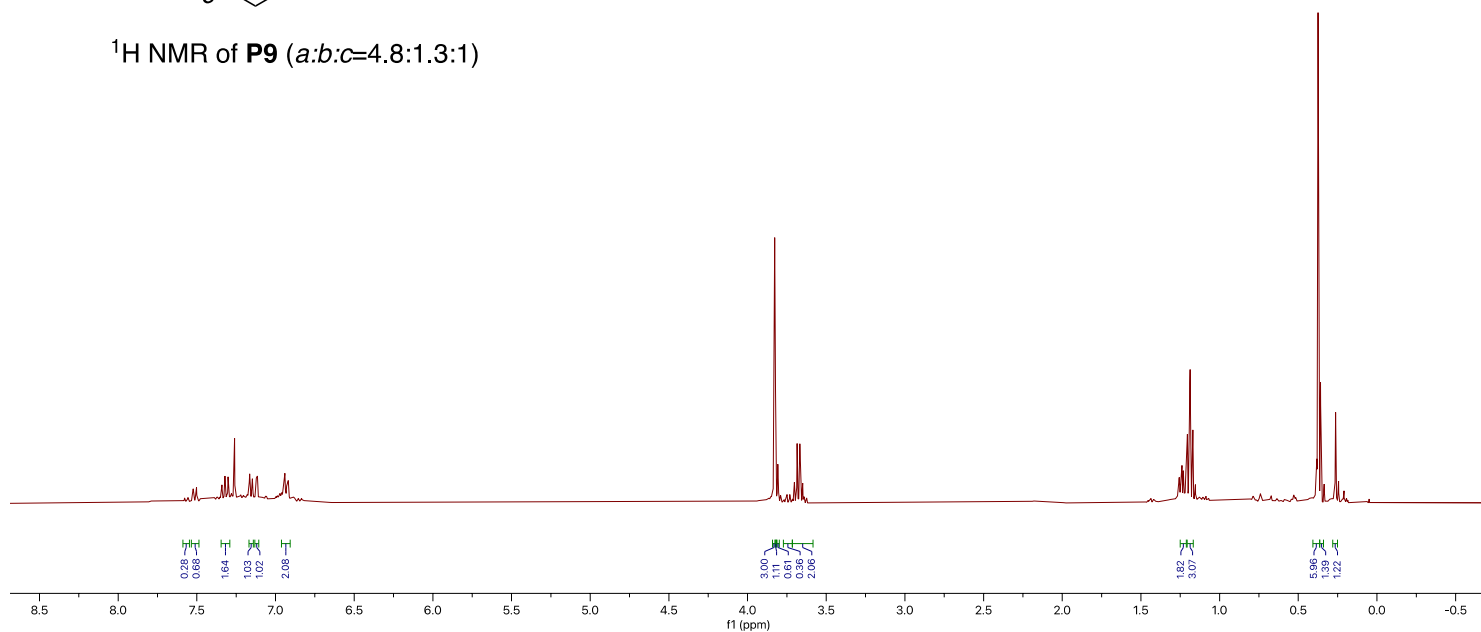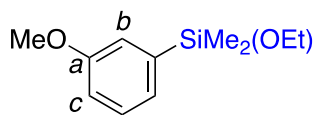

$^{13}\text{C}$  NMR of **P9** ( $a:b:c=4.8:1.3:1$ )

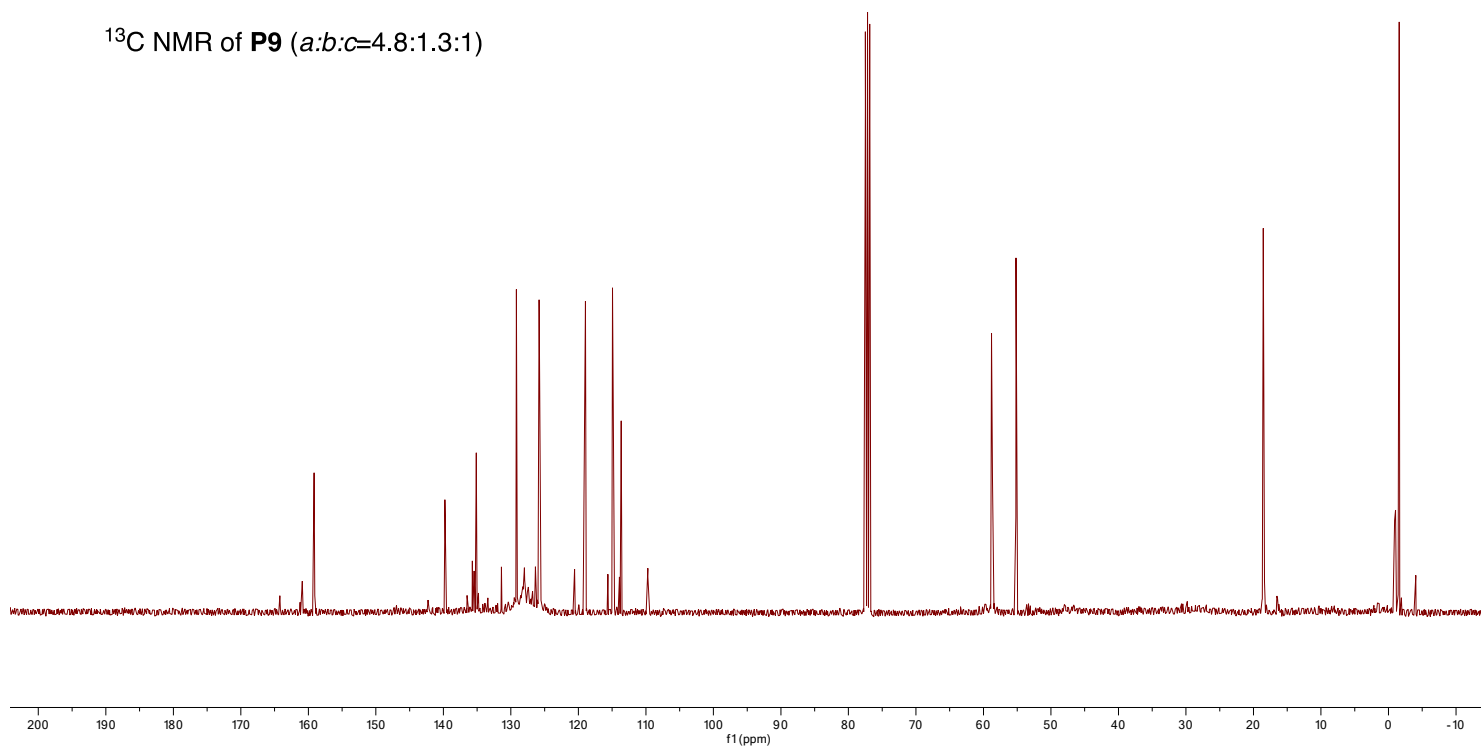

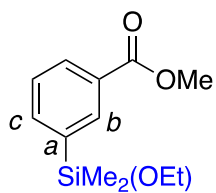

$^1\text{H}$  NMR of **P10** ( $a:b:c=3.7:2.9:1$ )

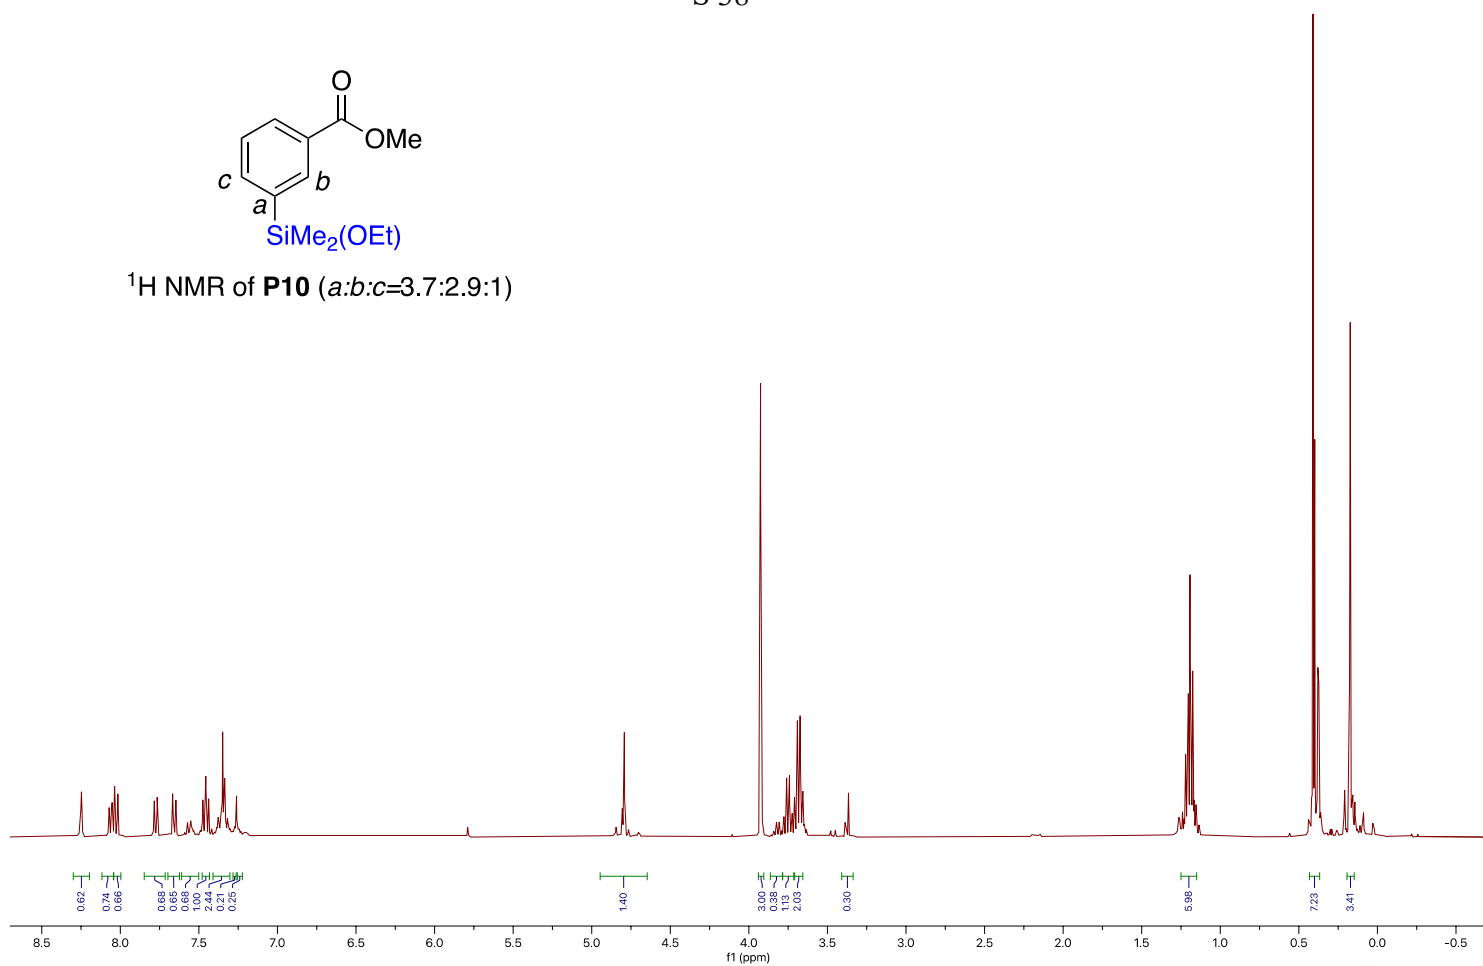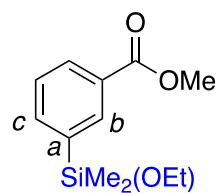

$^{13}\text{C}$  NMR of **P10** ( $a:b:c=3.7:2.9:1$ )

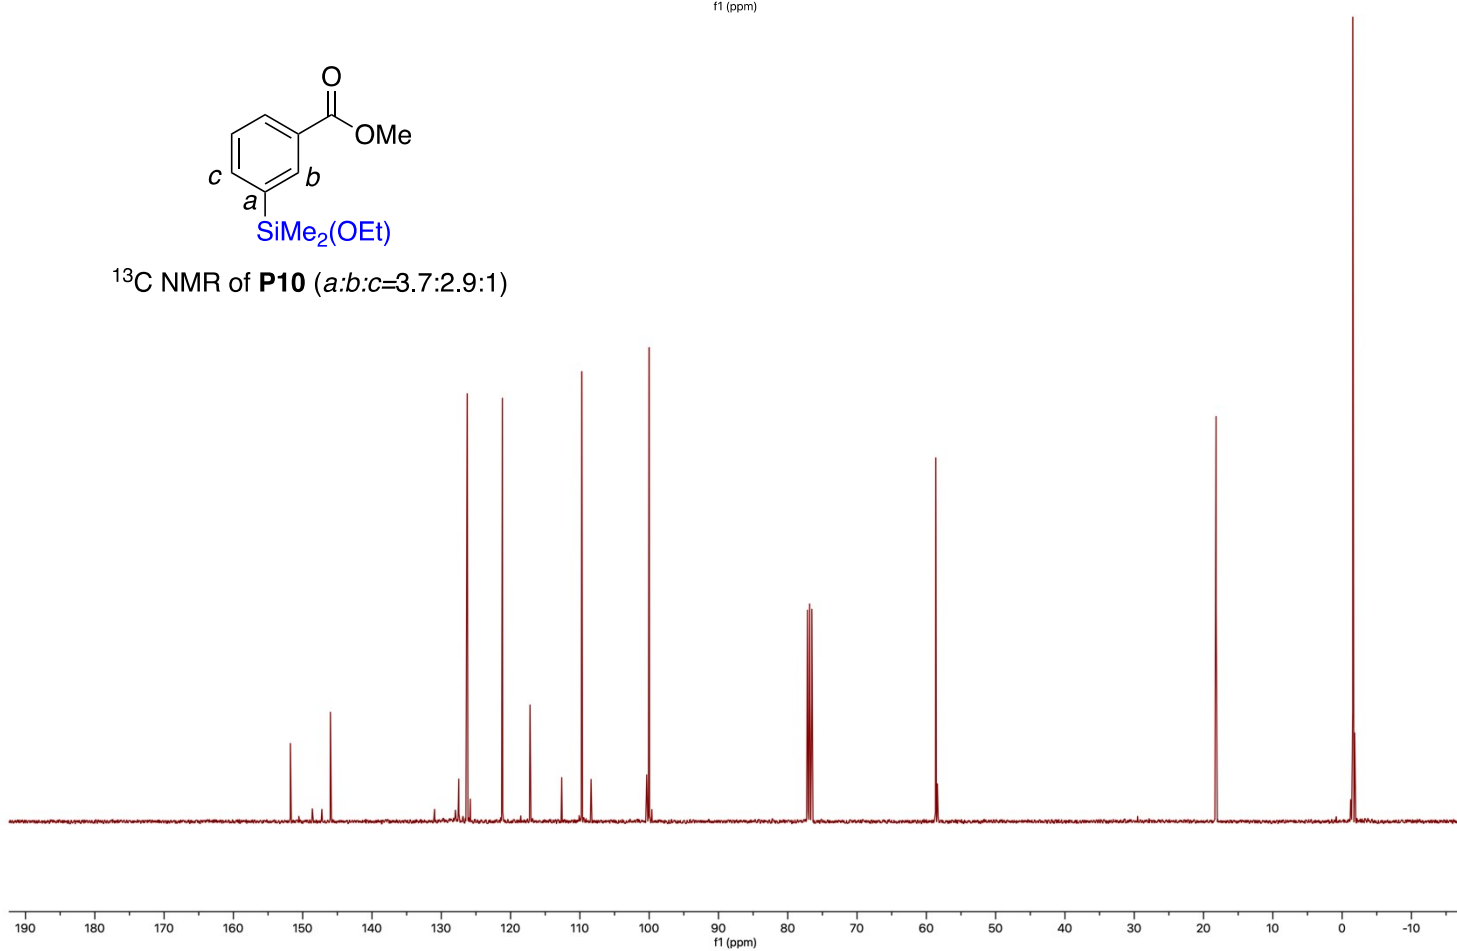

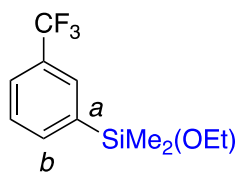 $^1\text{H}$  NMR of P11 ( $a:b=1.8:1$ )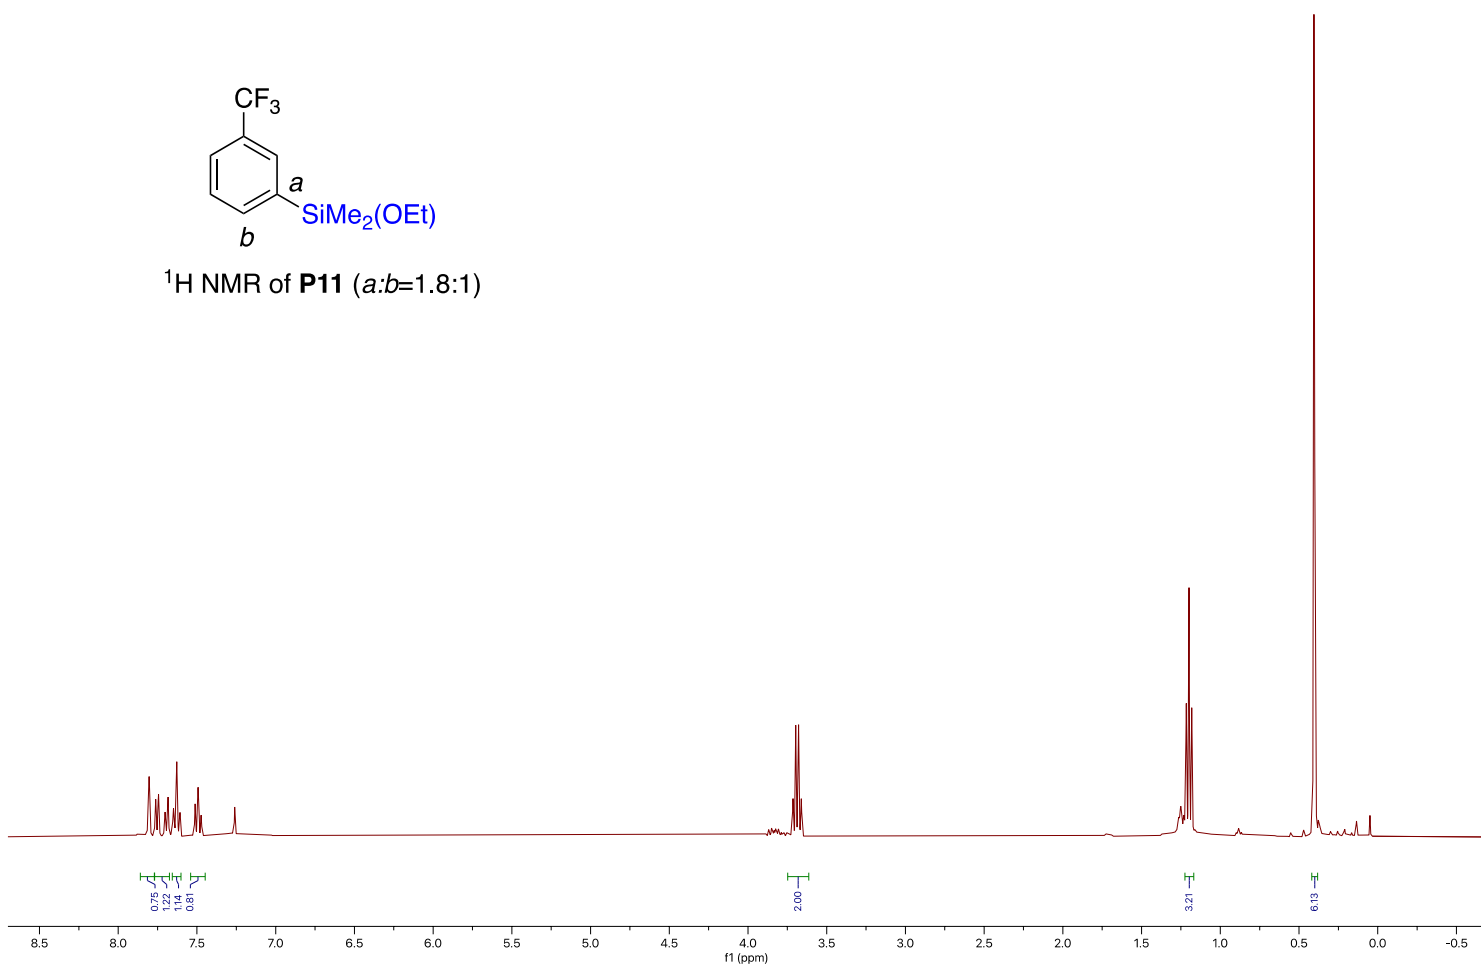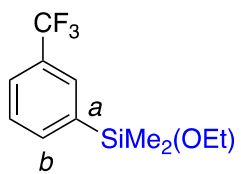 $^{13}\text{C}$  NMR of P11 ( $a:b=1.8:1$ )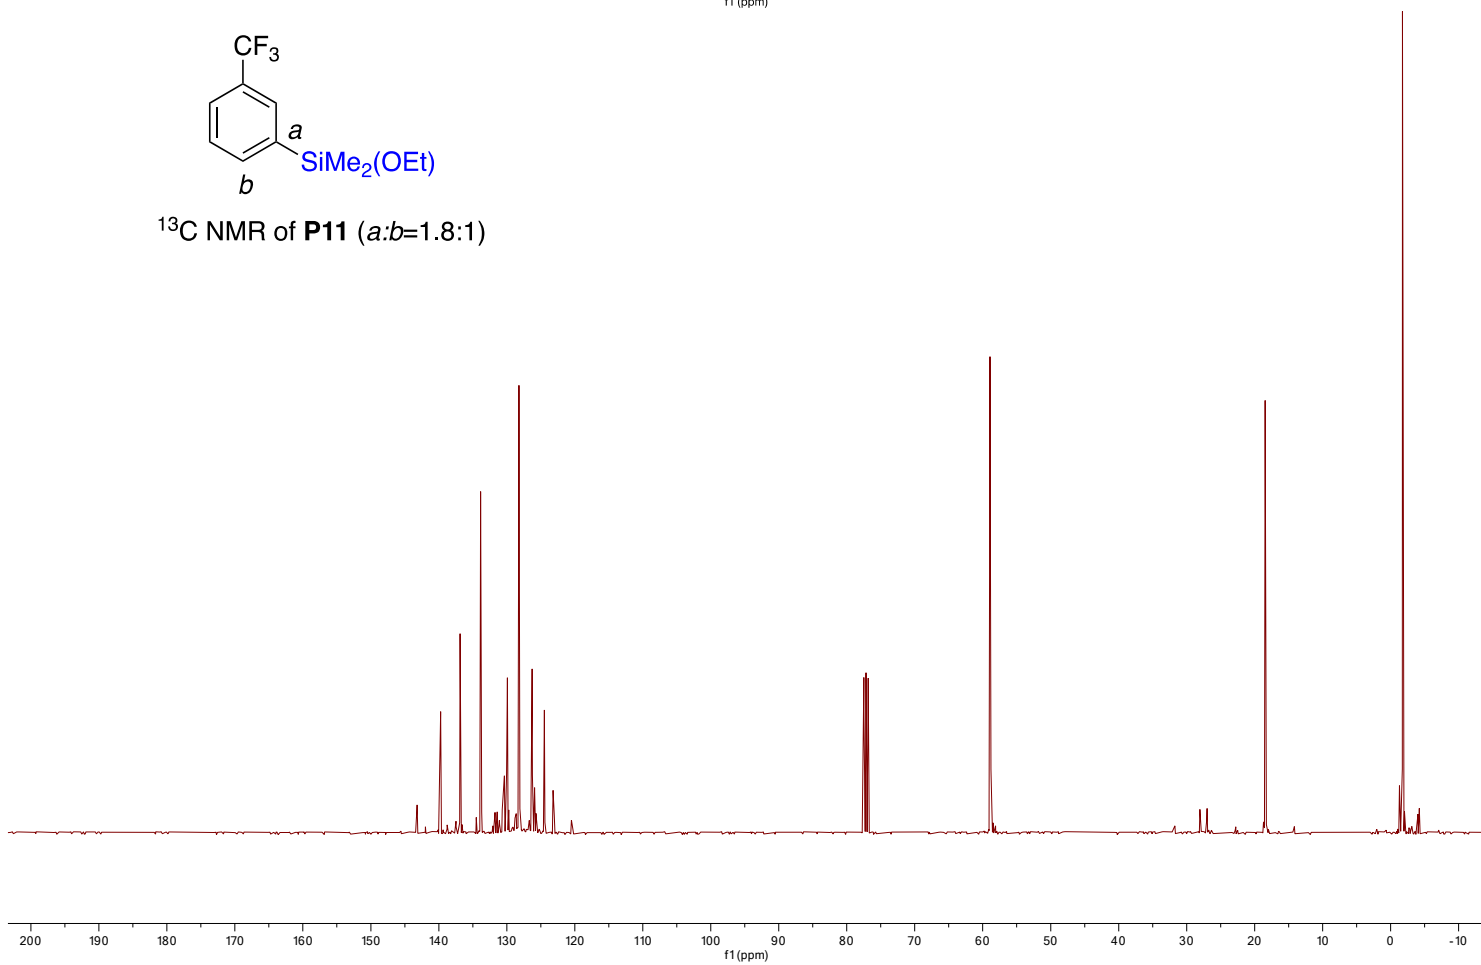



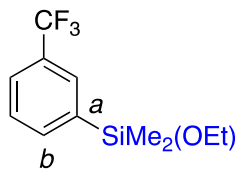

$^{19}\text{F}$  NMR of **P11** ( $a:b=1.8:1$ )

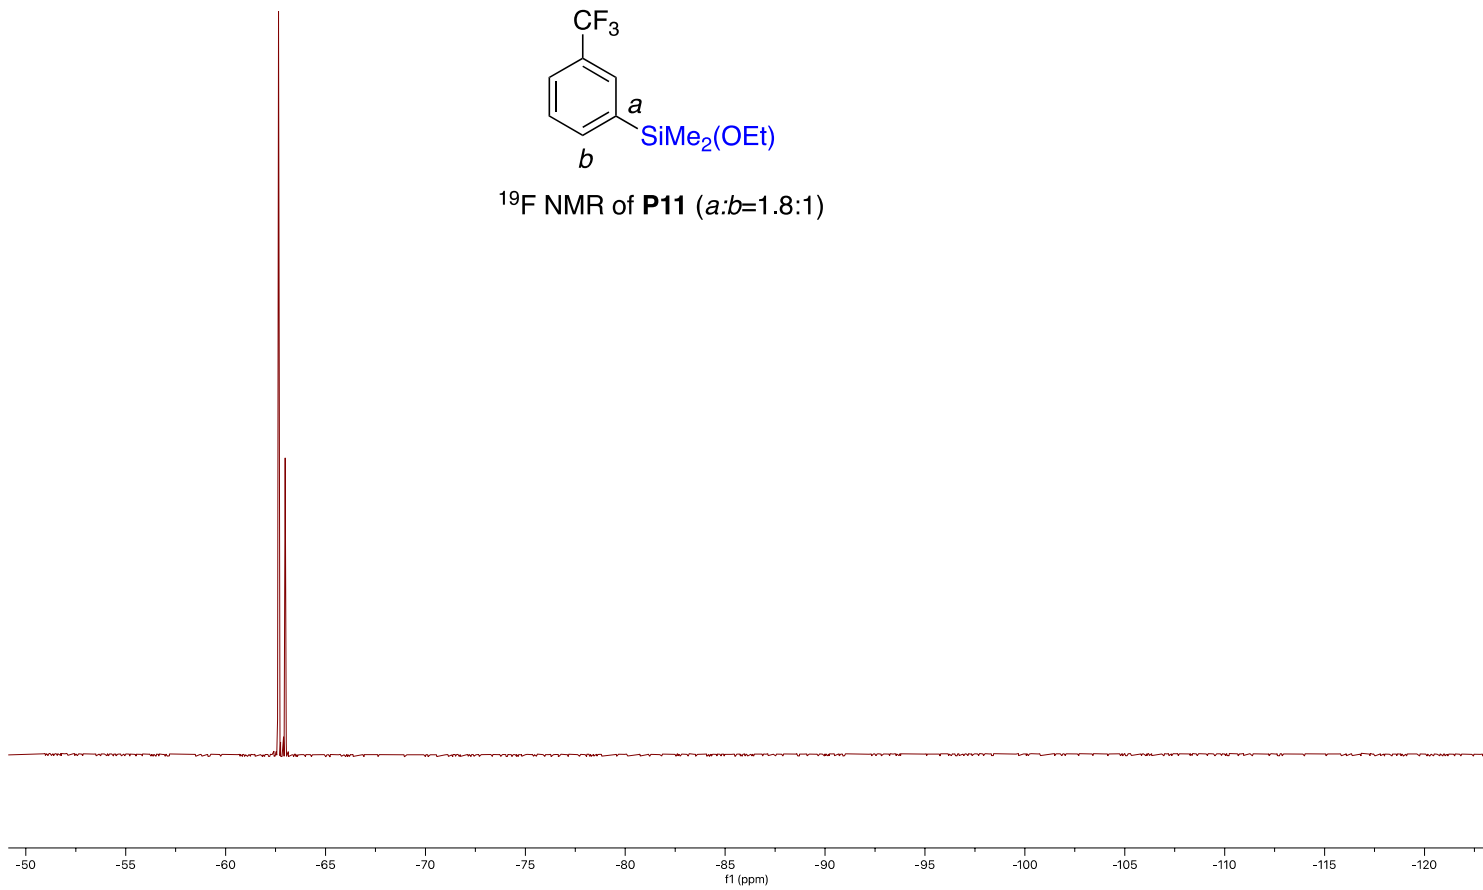

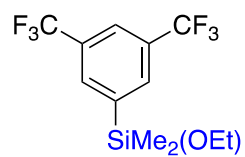 $^1\text{H}$  NMR of **P12**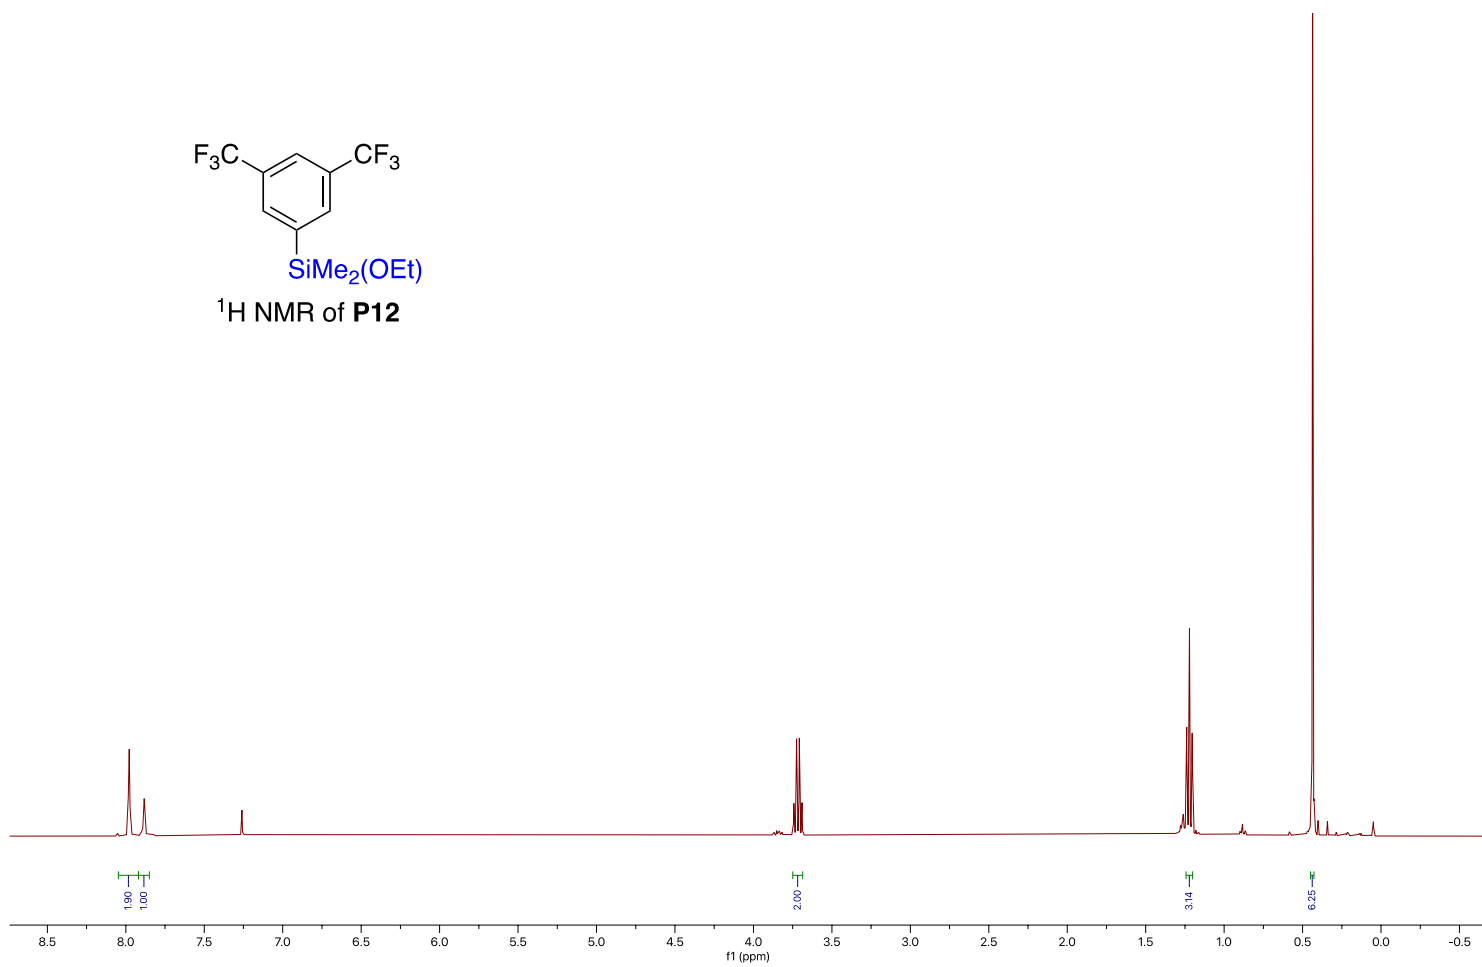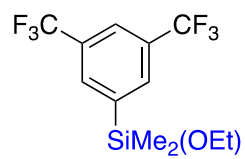 $^{13}\text{C}$  NMR of **P12**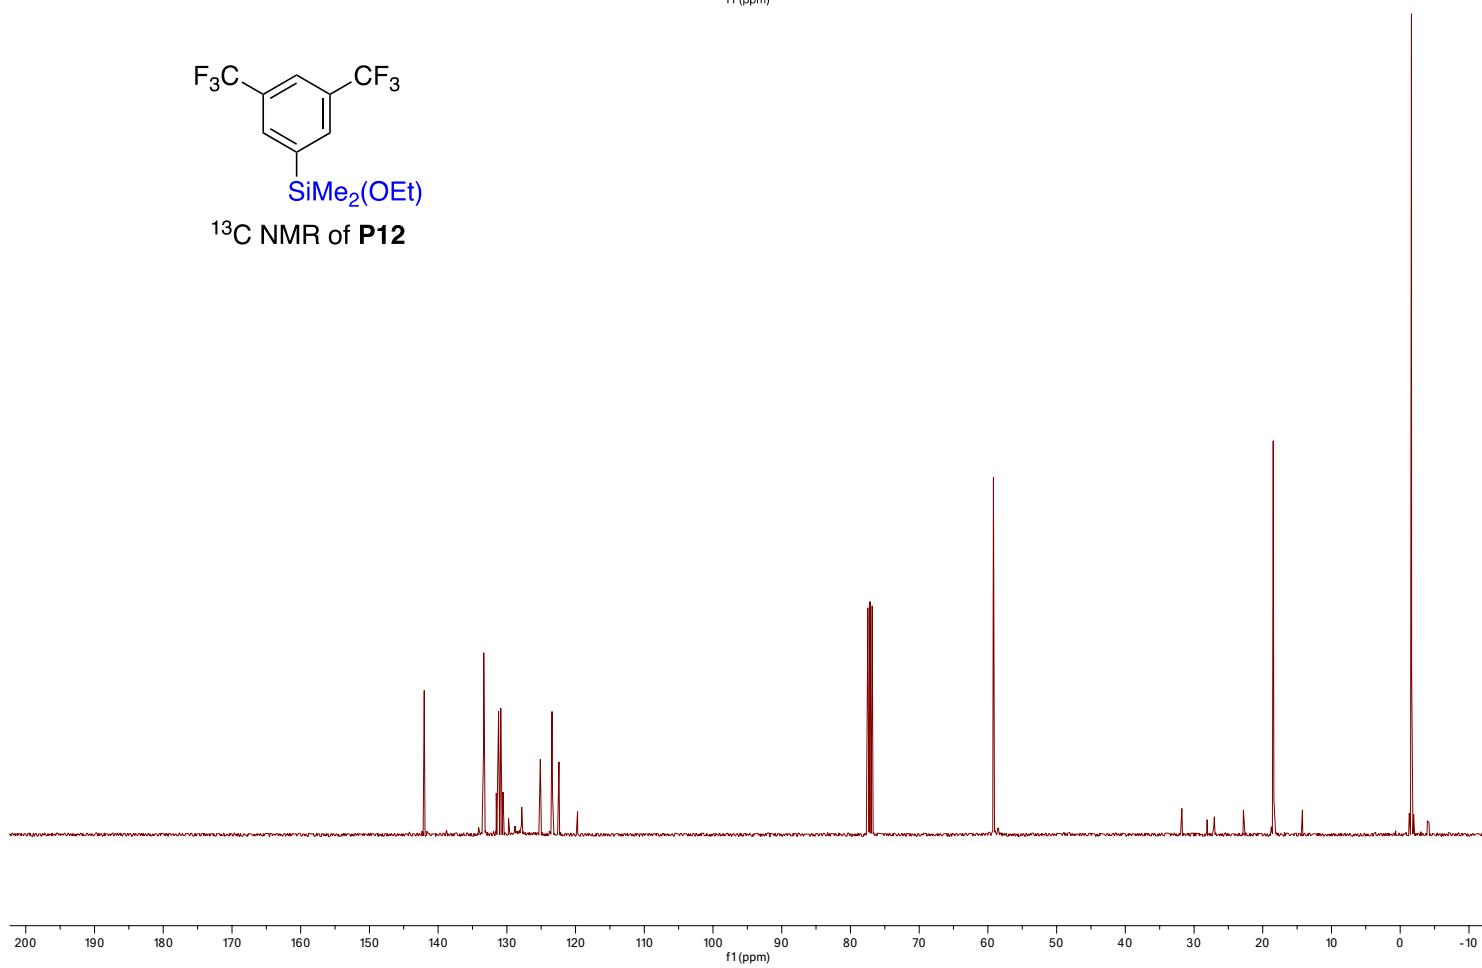

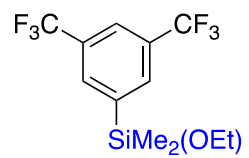

<sup>19</sup>F NMR of **P12**

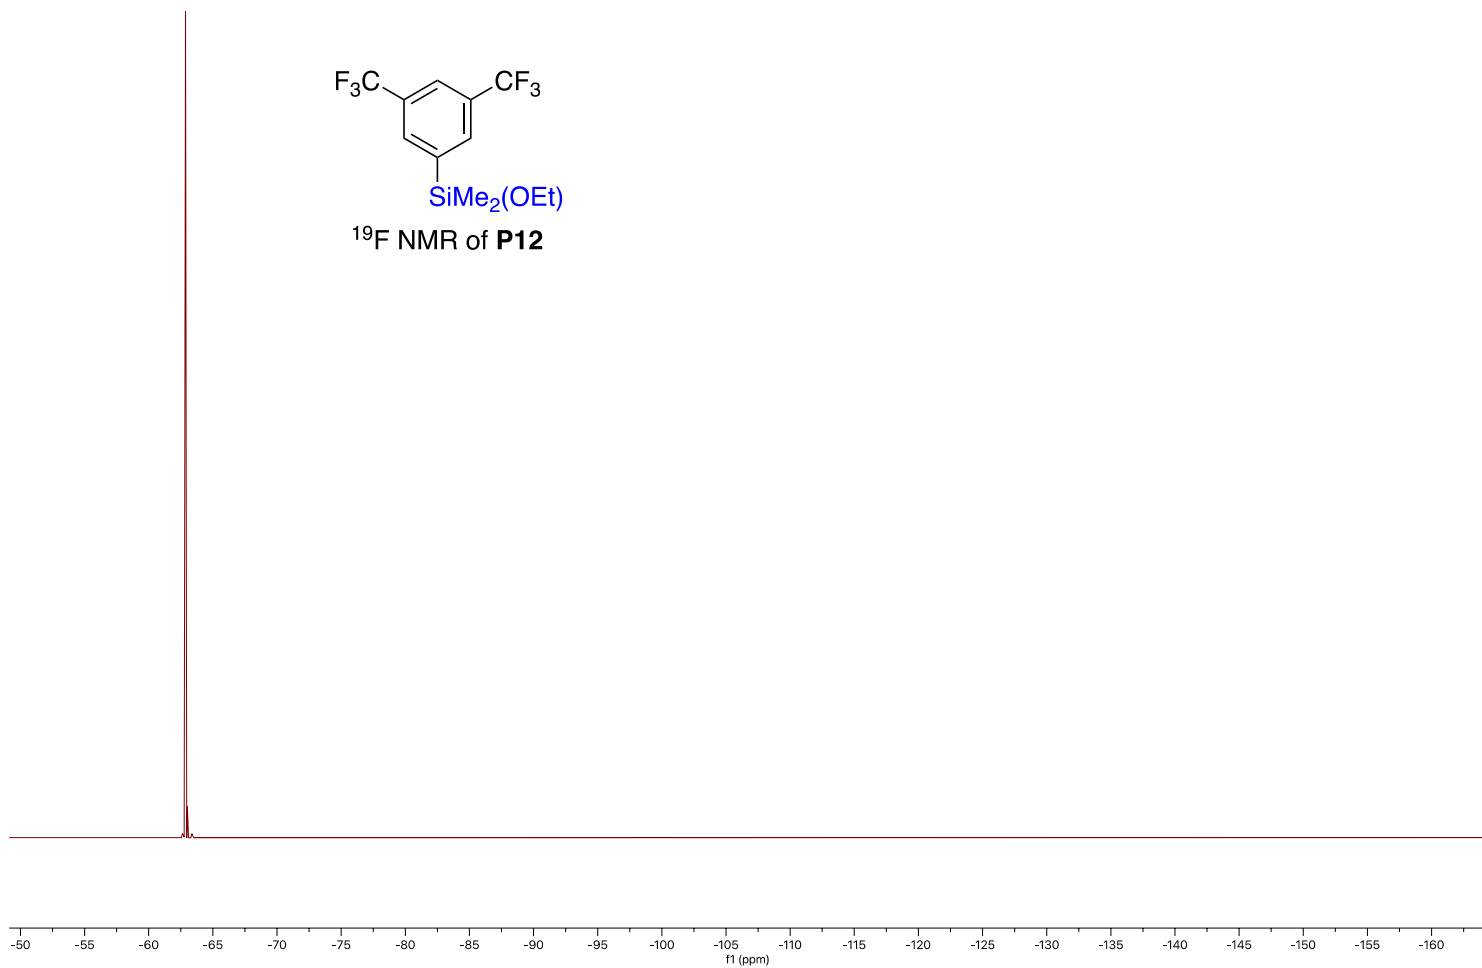

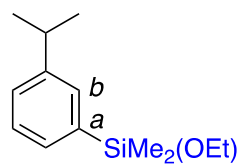 $^1\text{H}$  NMR of **P13** ( $a:b=1.9:1$ )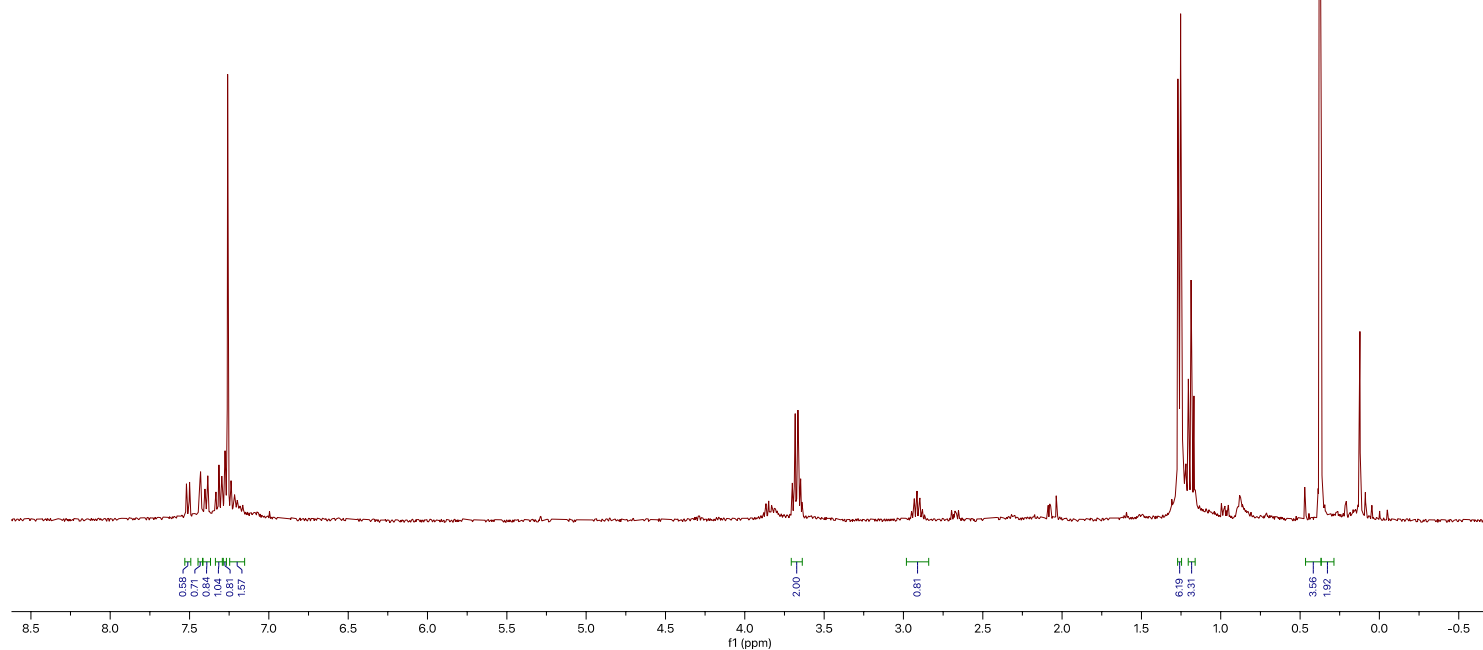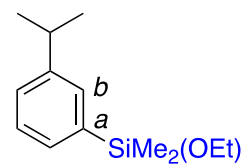 $^{13}\text{C}$  NMR of **P13** ( $a:b=1.9:1$ )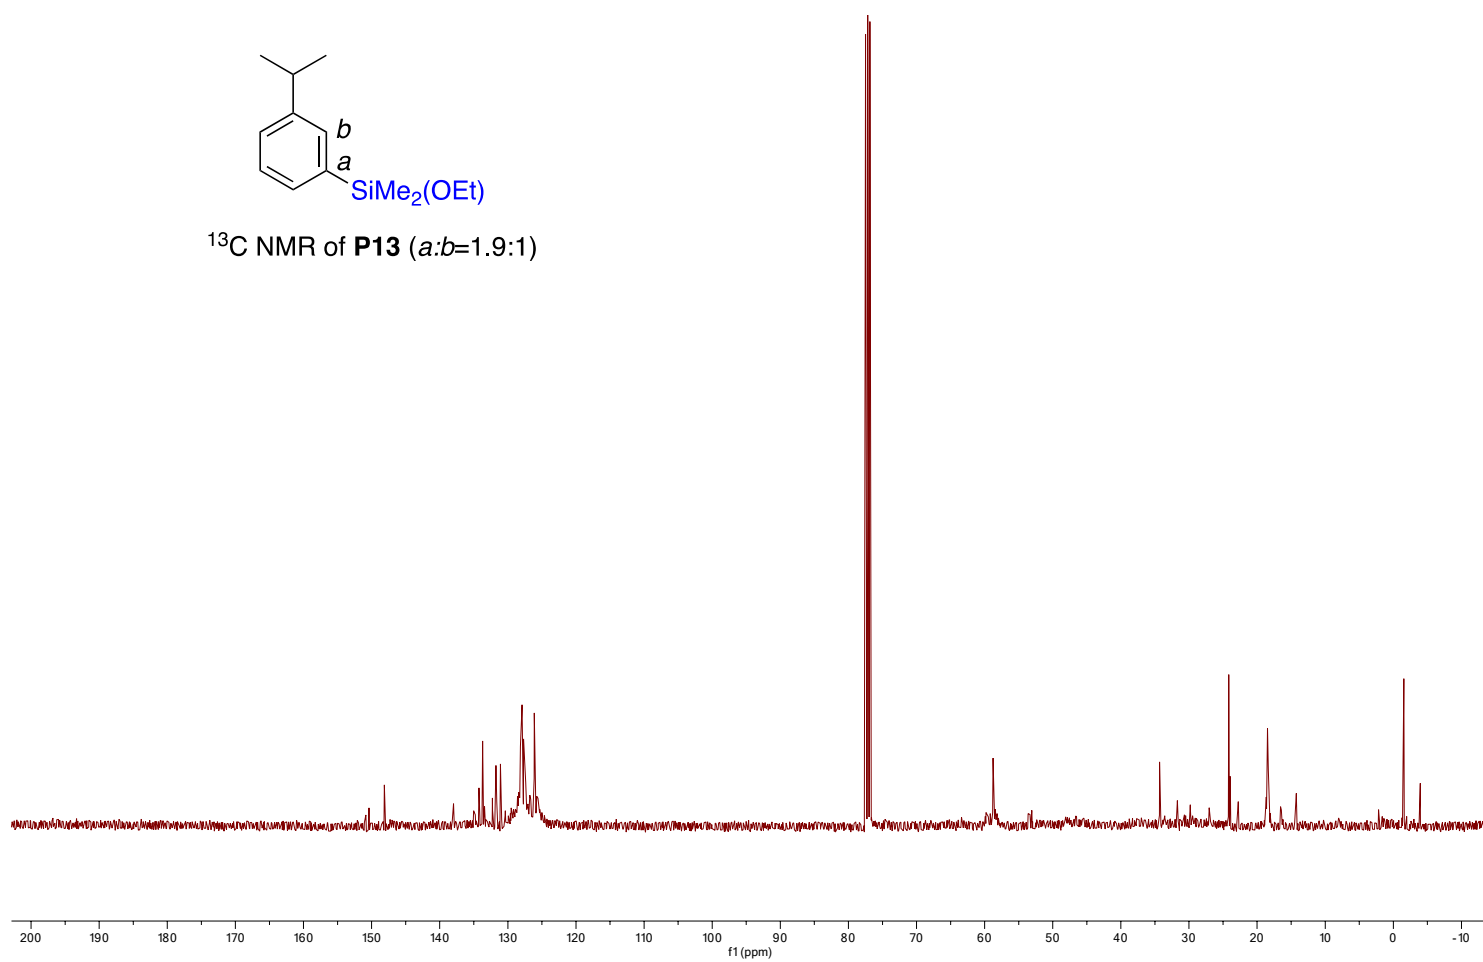

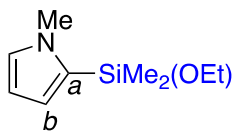 $^1\text{H}$  NMR of **P15** ( $a:b=7.1:1$ )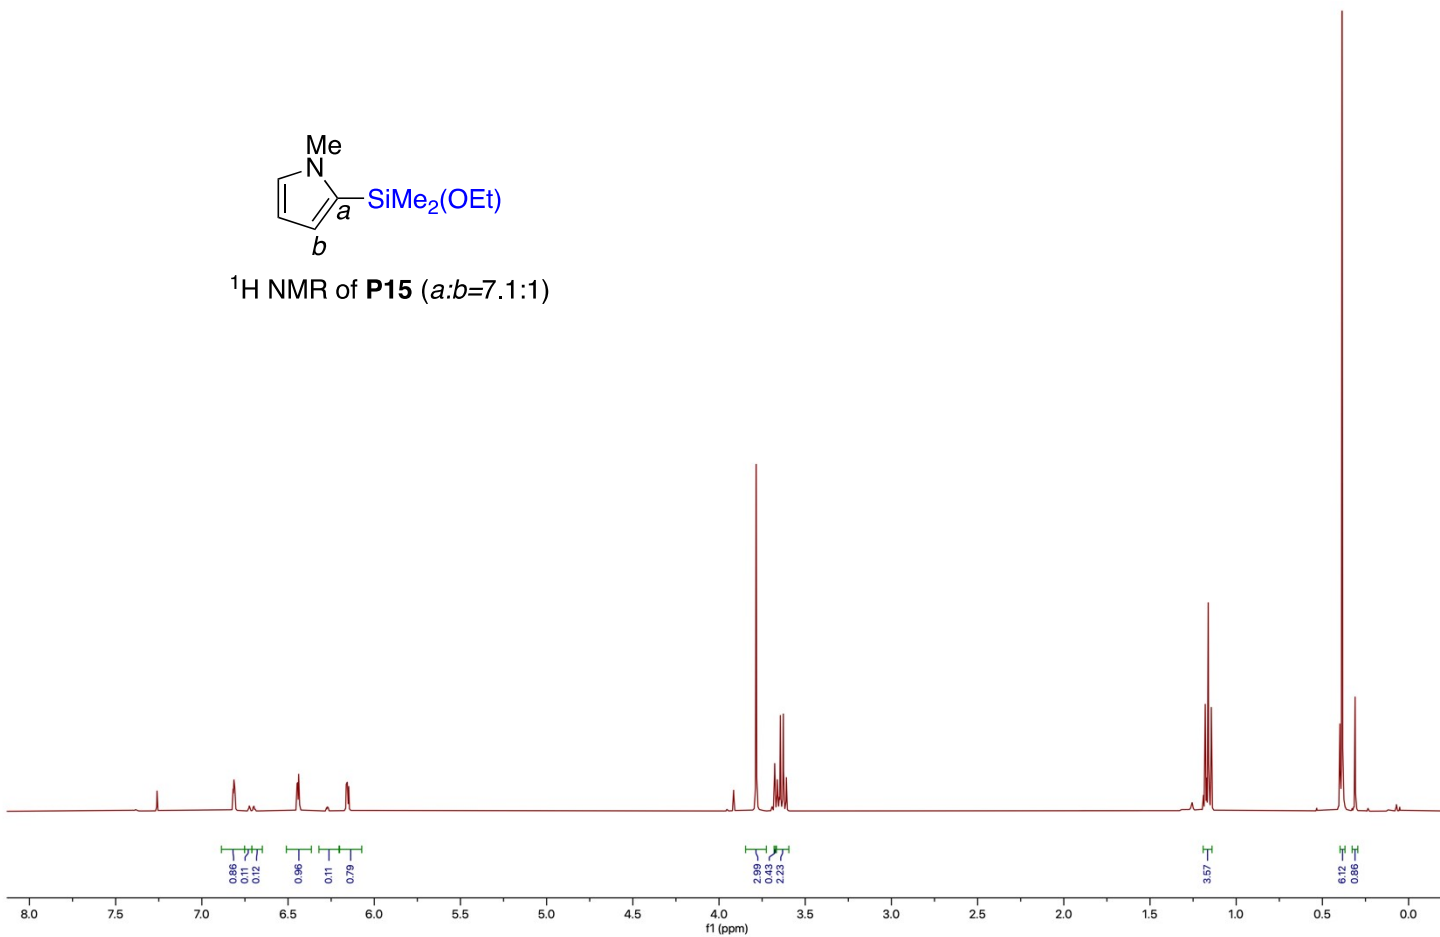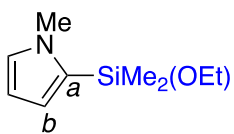 $^{13}\text{C}$  NMR of **P15** ( $a:b=7.1:1$ )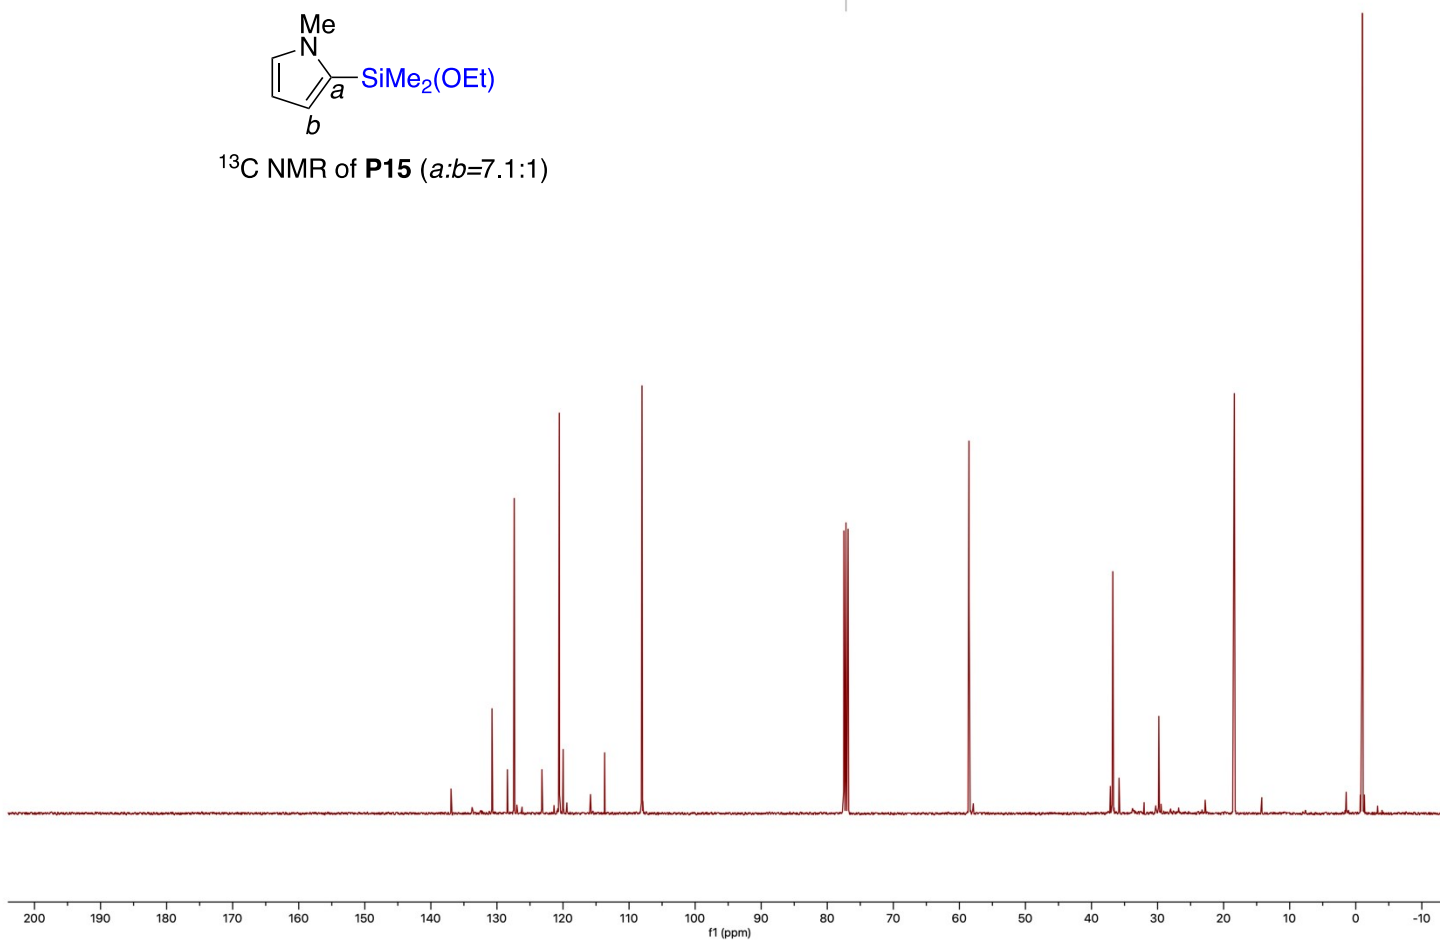

S 45

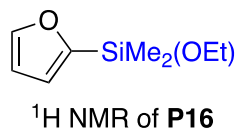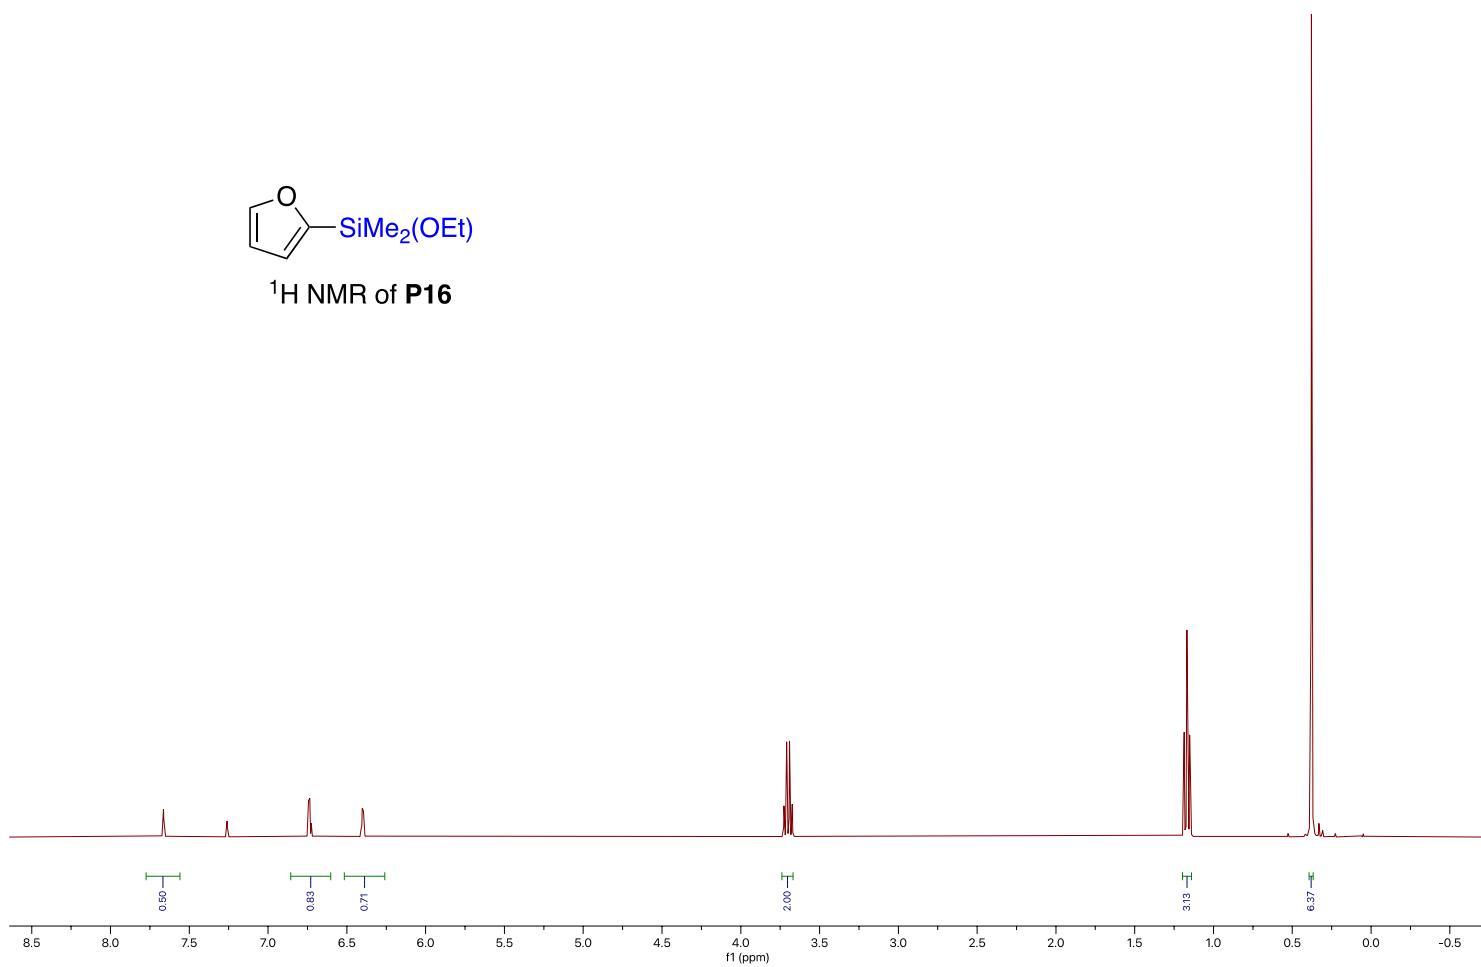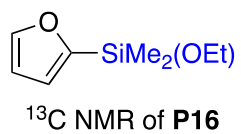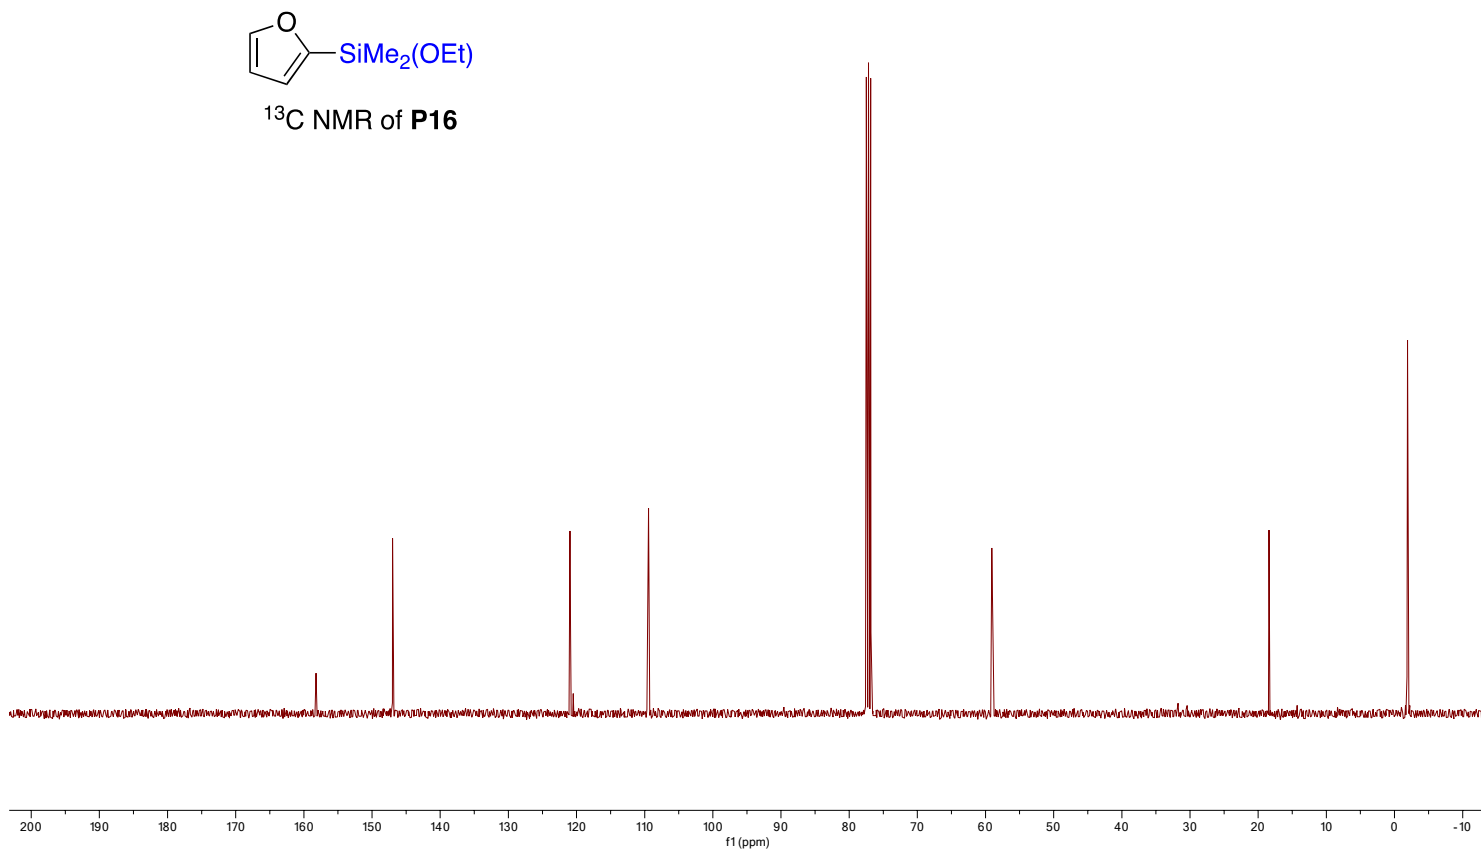

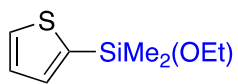 $^1\text{H}$  NMR of **P17**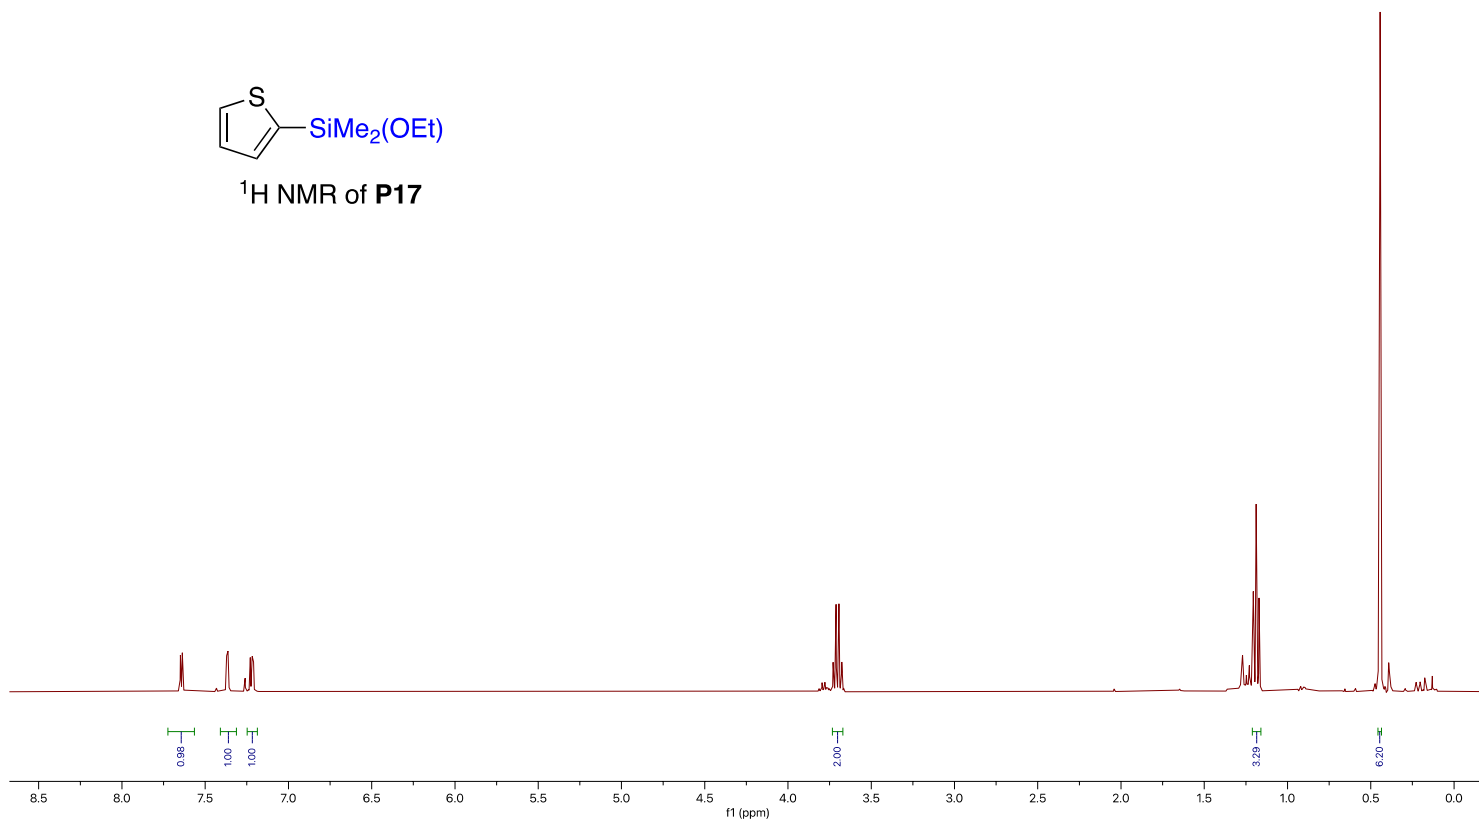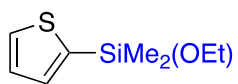 $^{13}\text{C}$  NMR of **P17**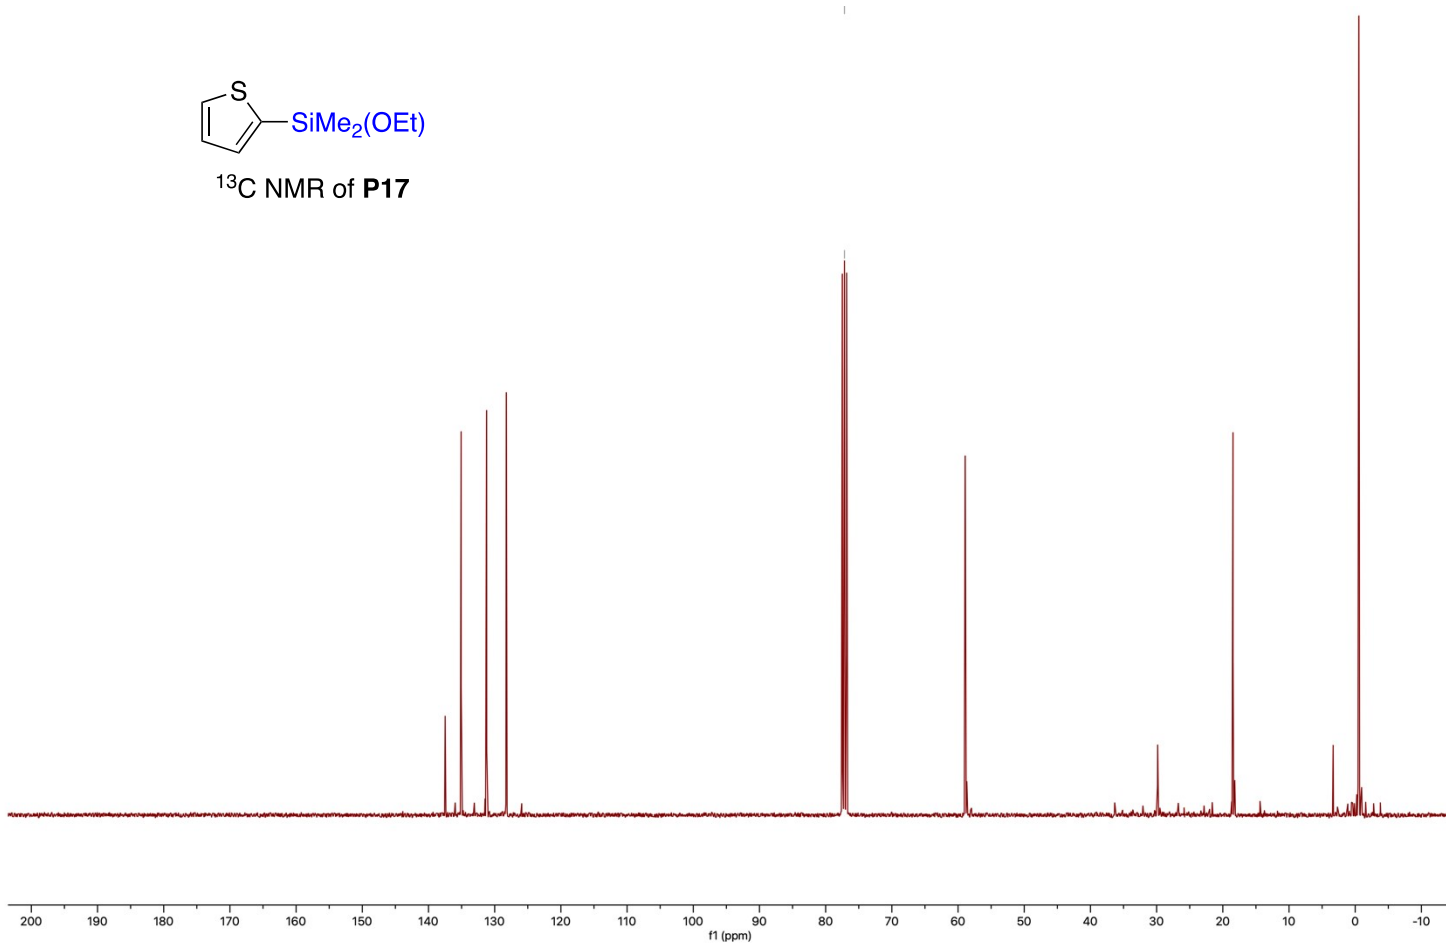

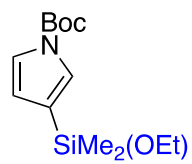<sup>1</sup>H NMR of P18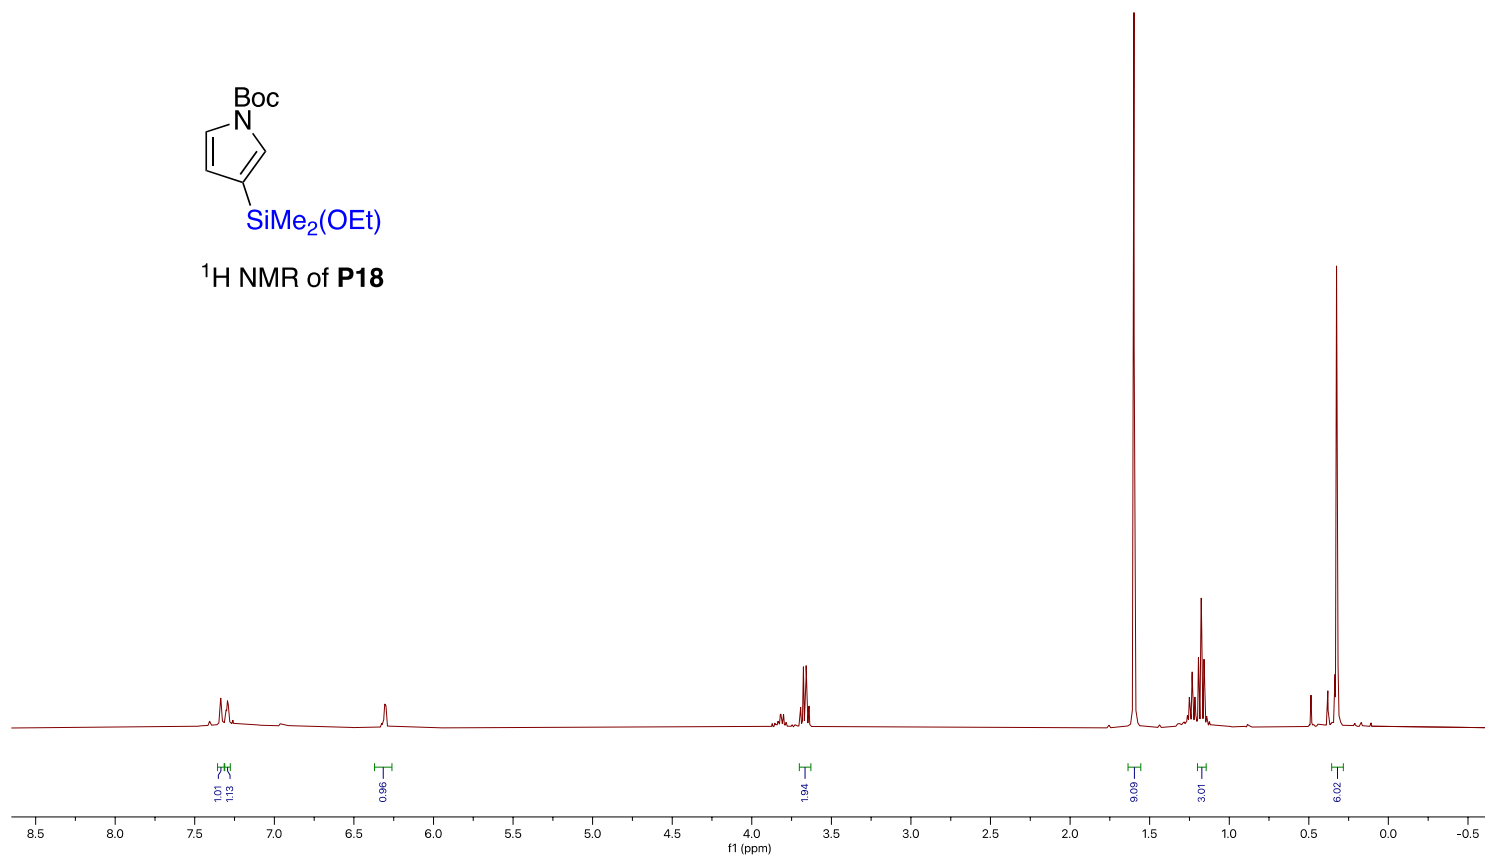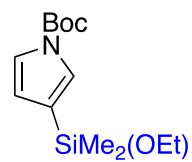<sup>13</sup>C NMR of P18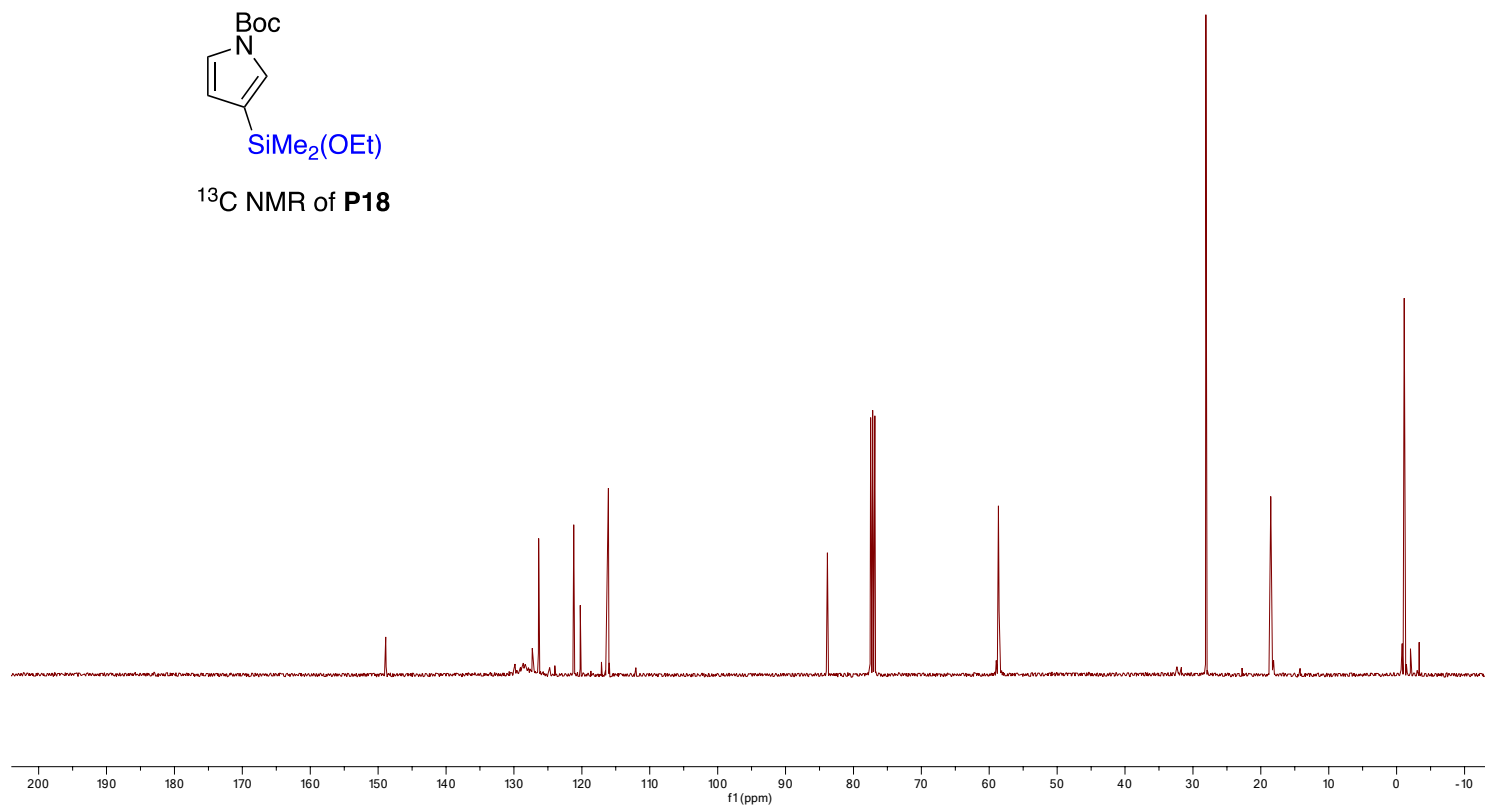



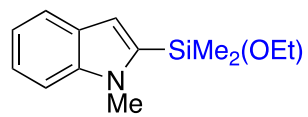 $^1\text{H}$  NMR of **P19**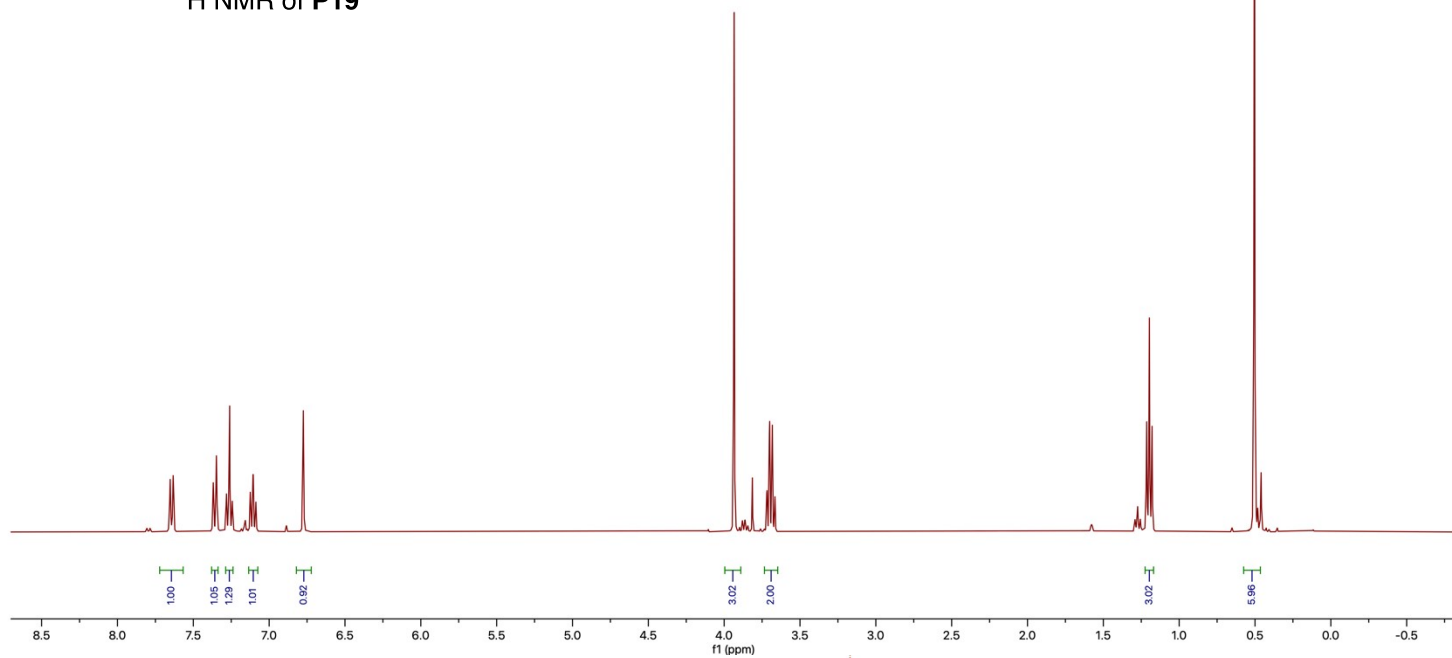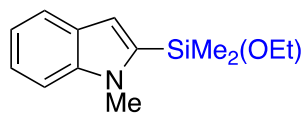 $^{13}\text{C}$  NMR of **P19**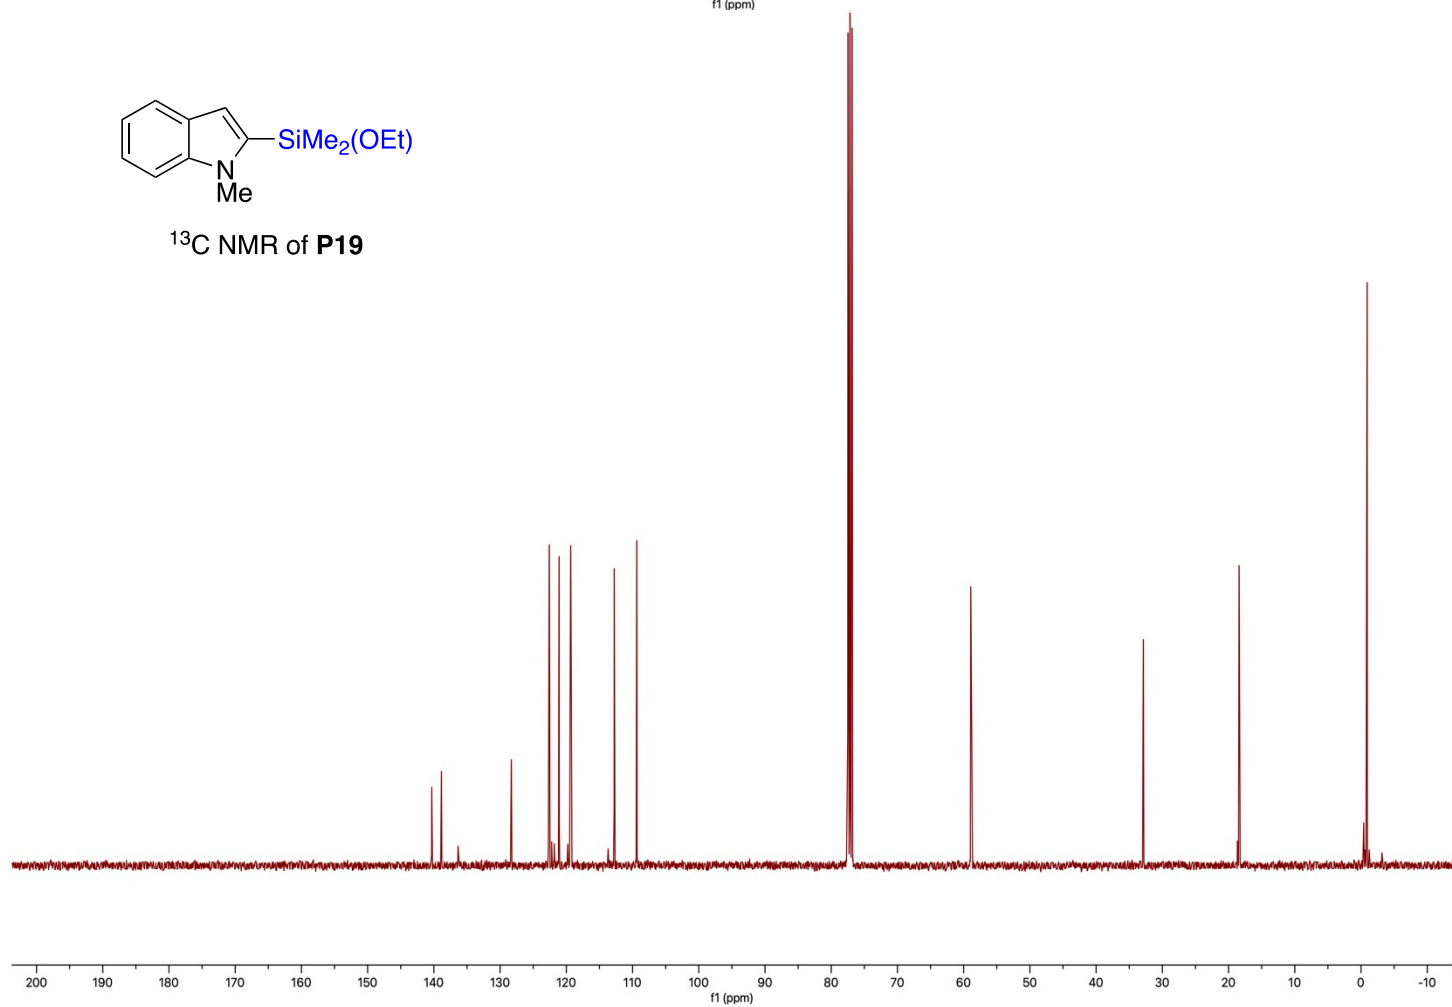

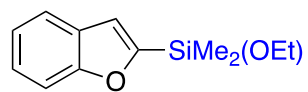 $^1\text{H}$  NMR of **P20**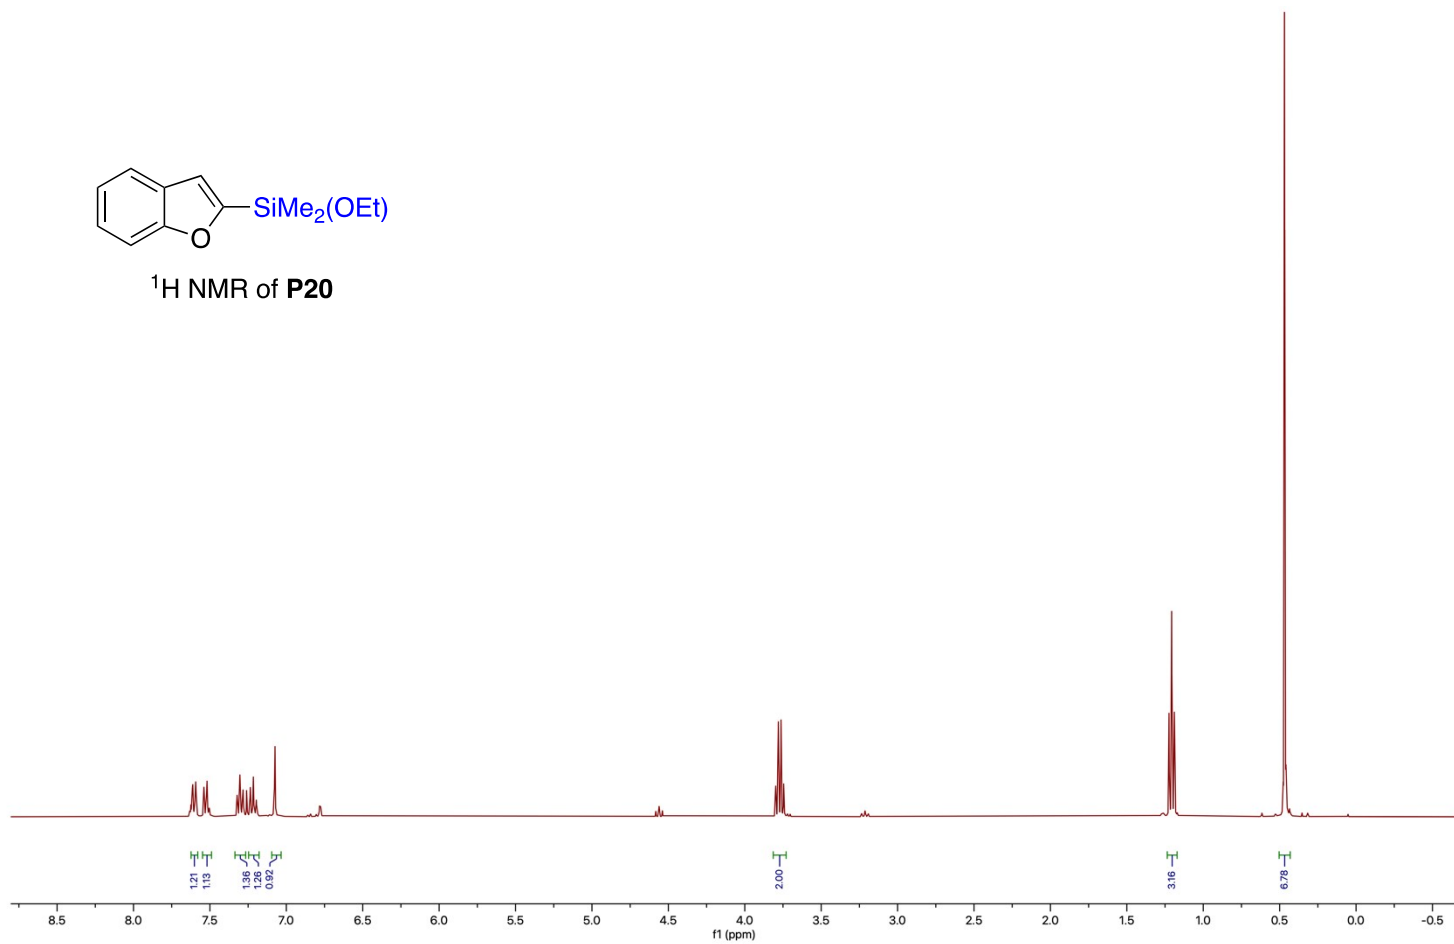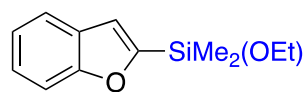 $^{13}\text{C}$  NMR of **P20**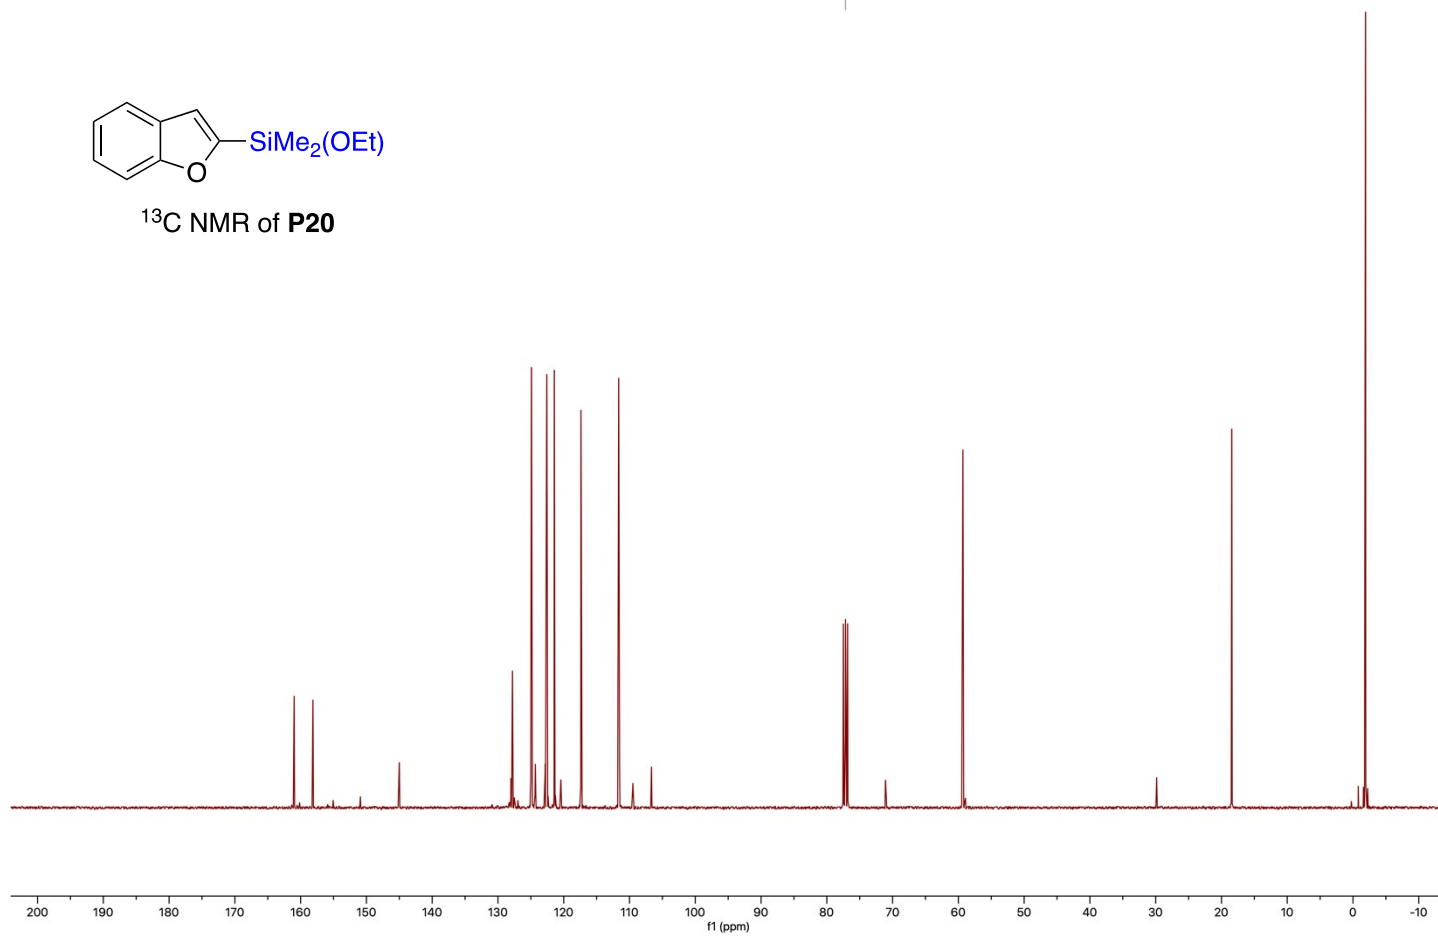

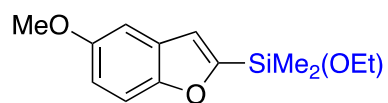<sup>1</sup>H NMR of P21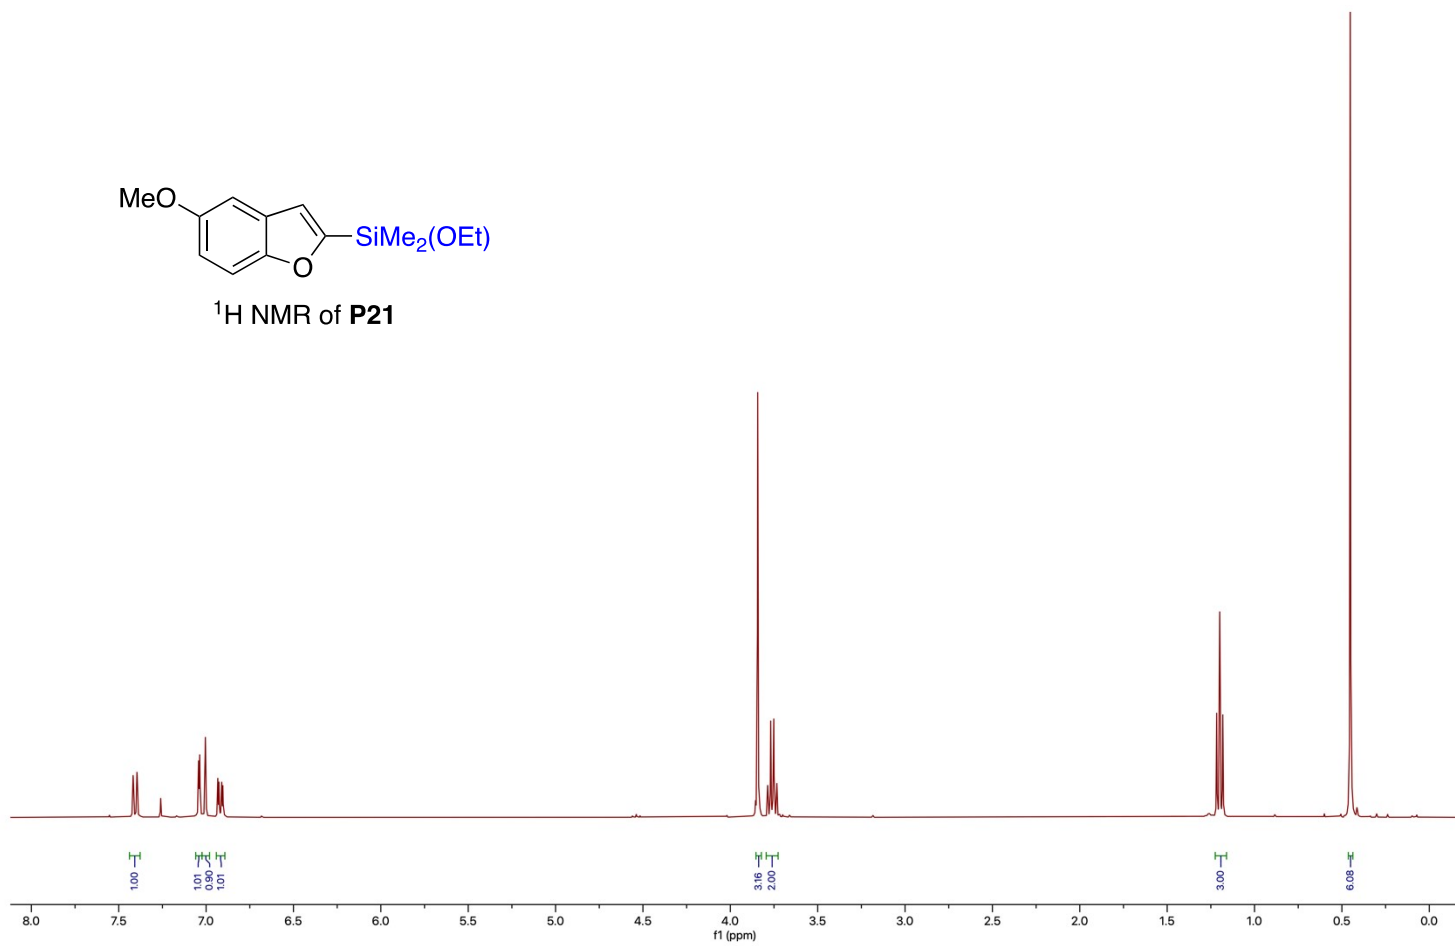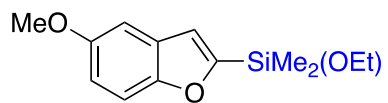<sup>13</sup>C NMR of P21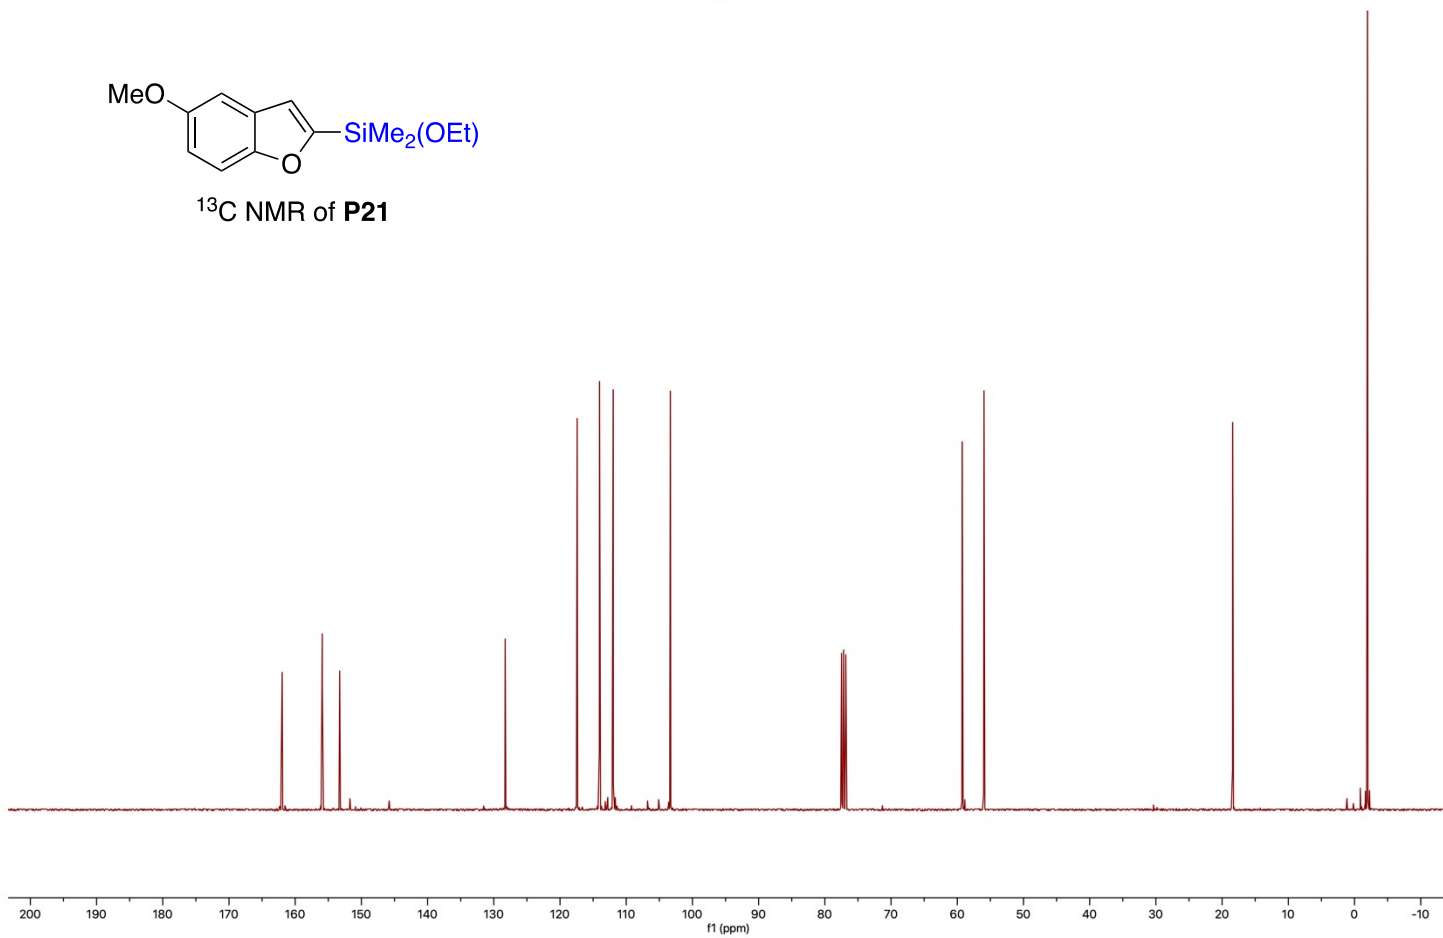

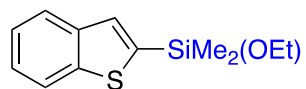 $^1\text{H}$  NMR of **P22**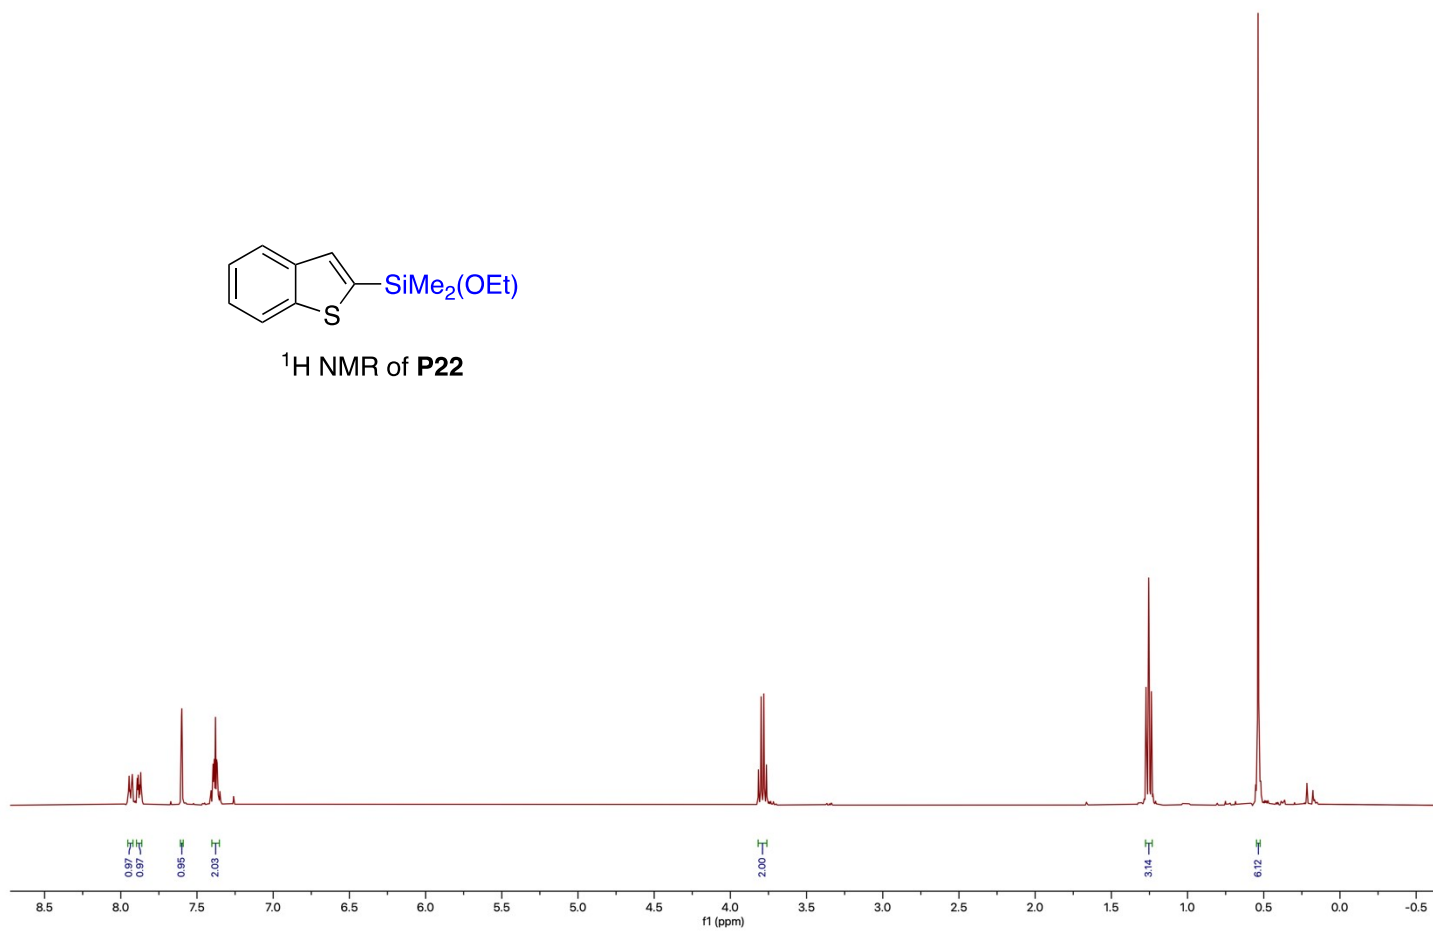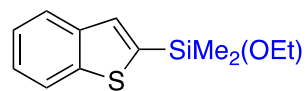 $^{13}\text{C}$  NMR of **P22**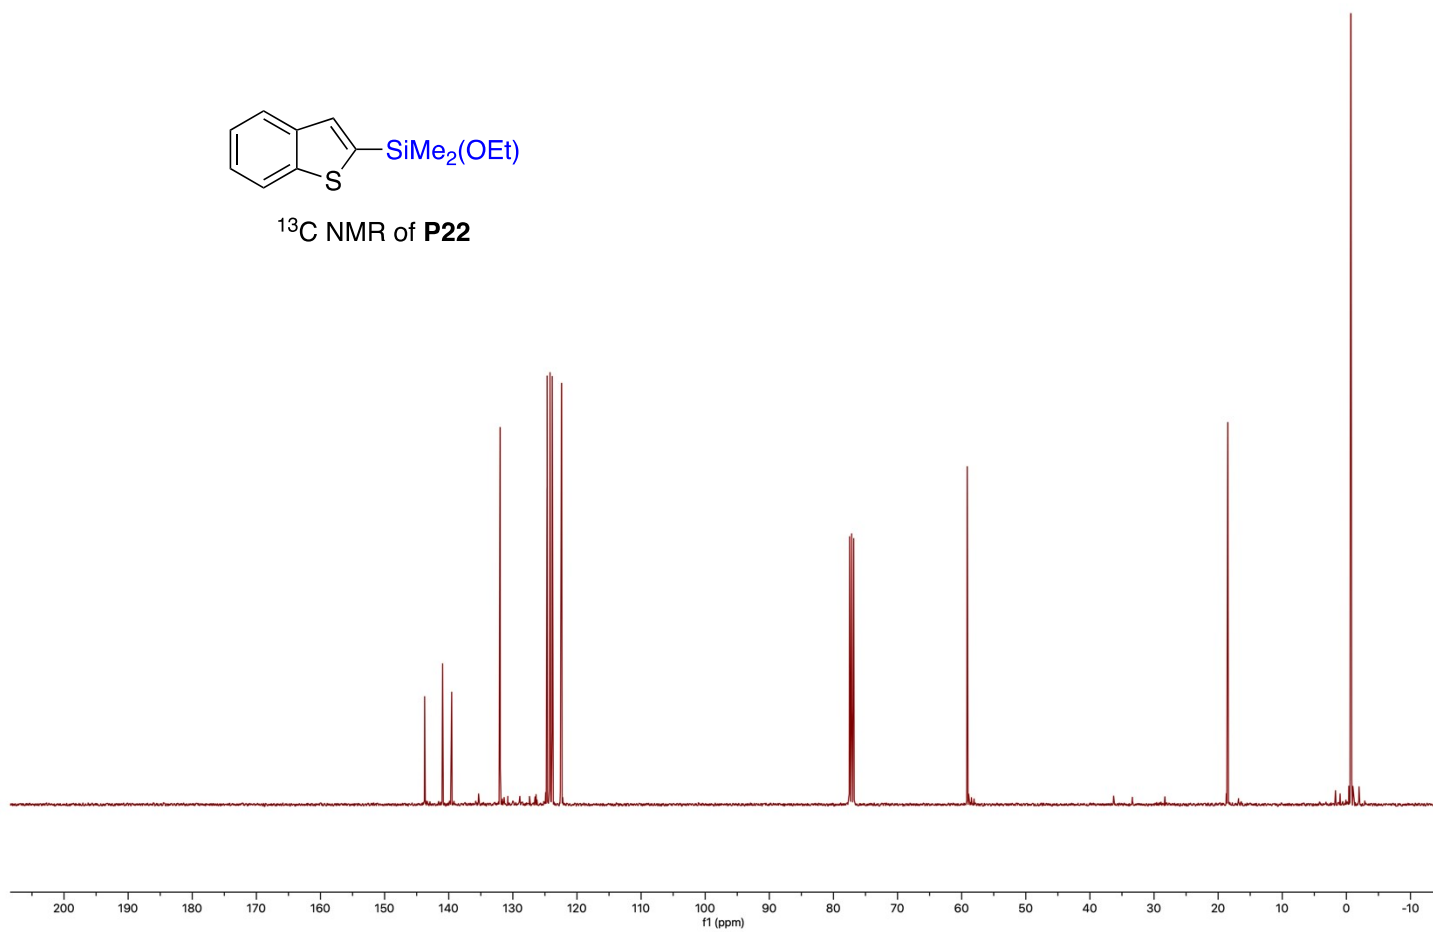

## 5.2 Double C–H Silylation Products

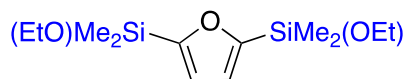<sup>1</sup>H NMR of P23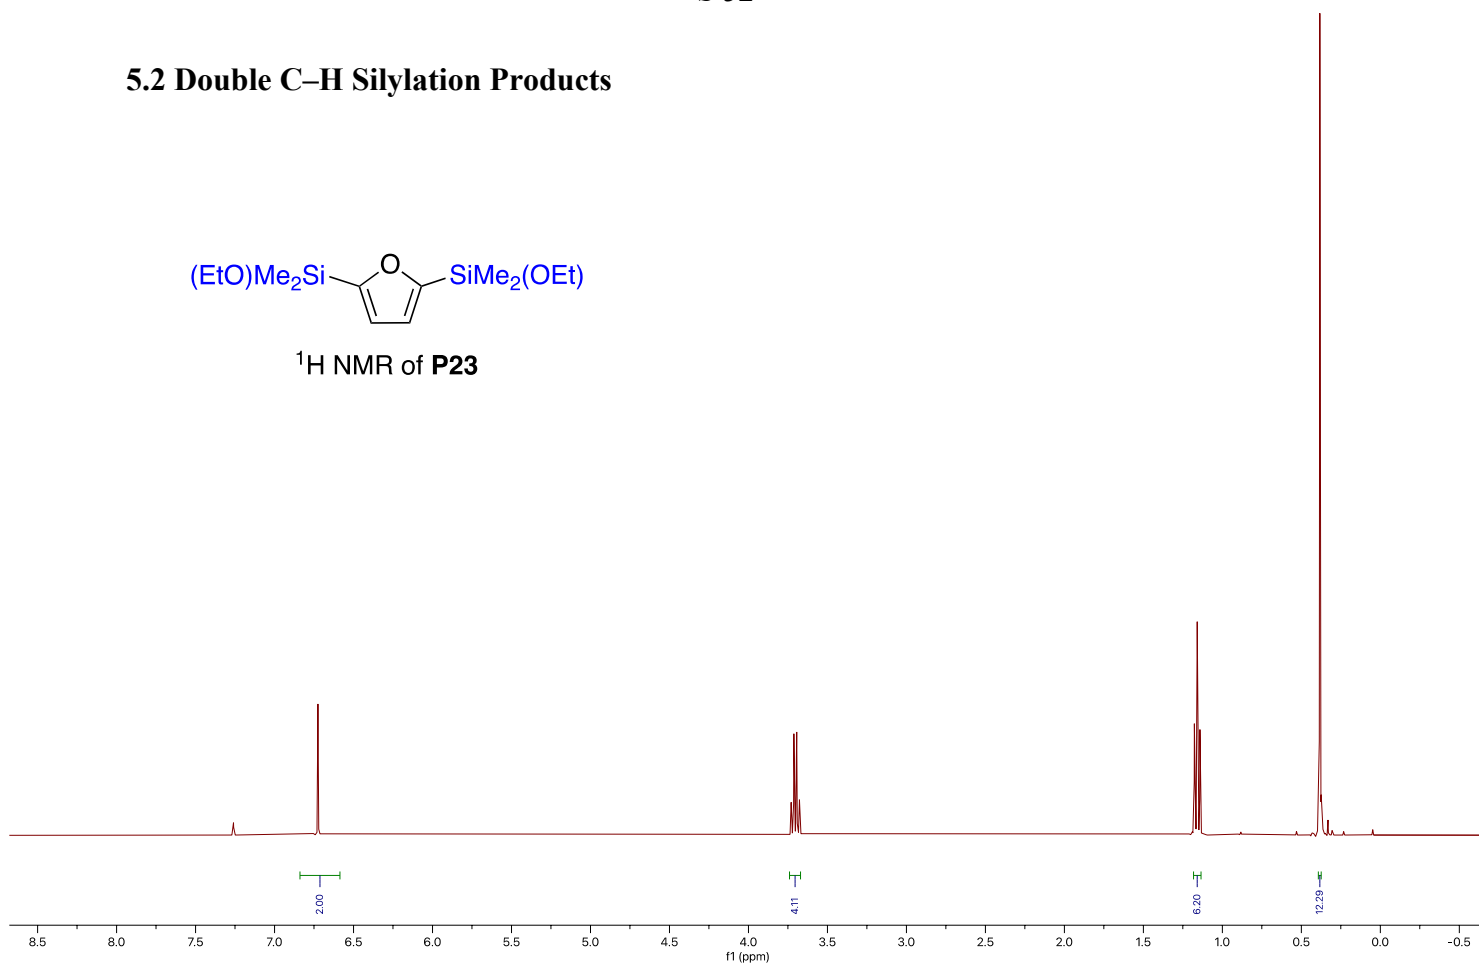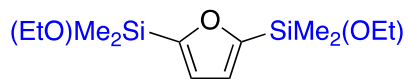<sup>13</sup>C NMR of P23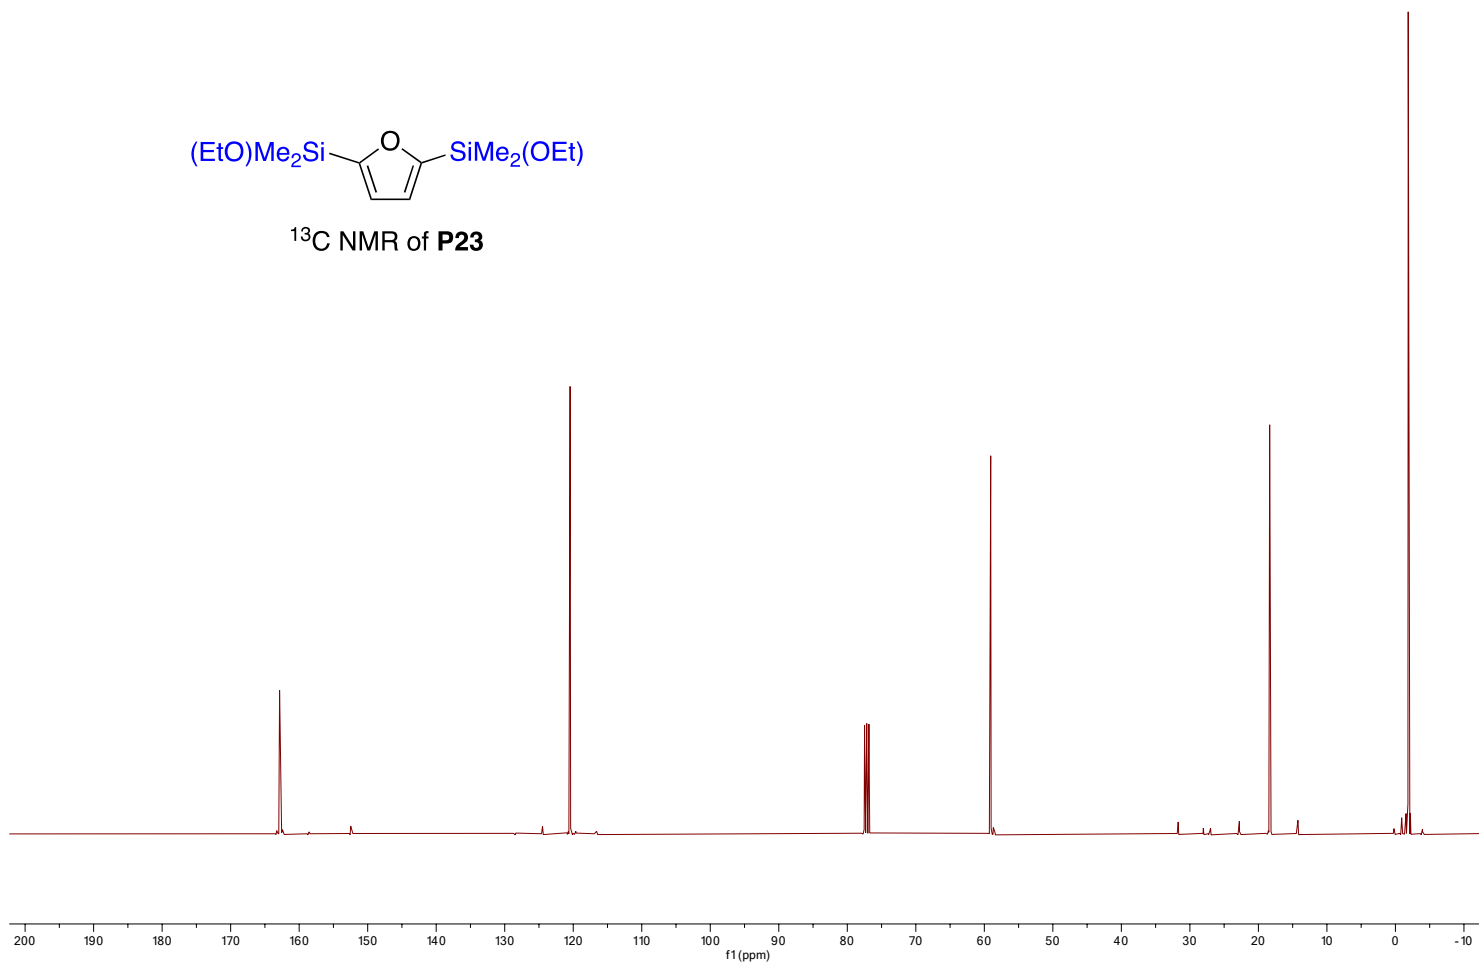

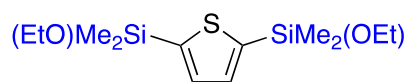 $^1\text{H}$  NMR of **P24**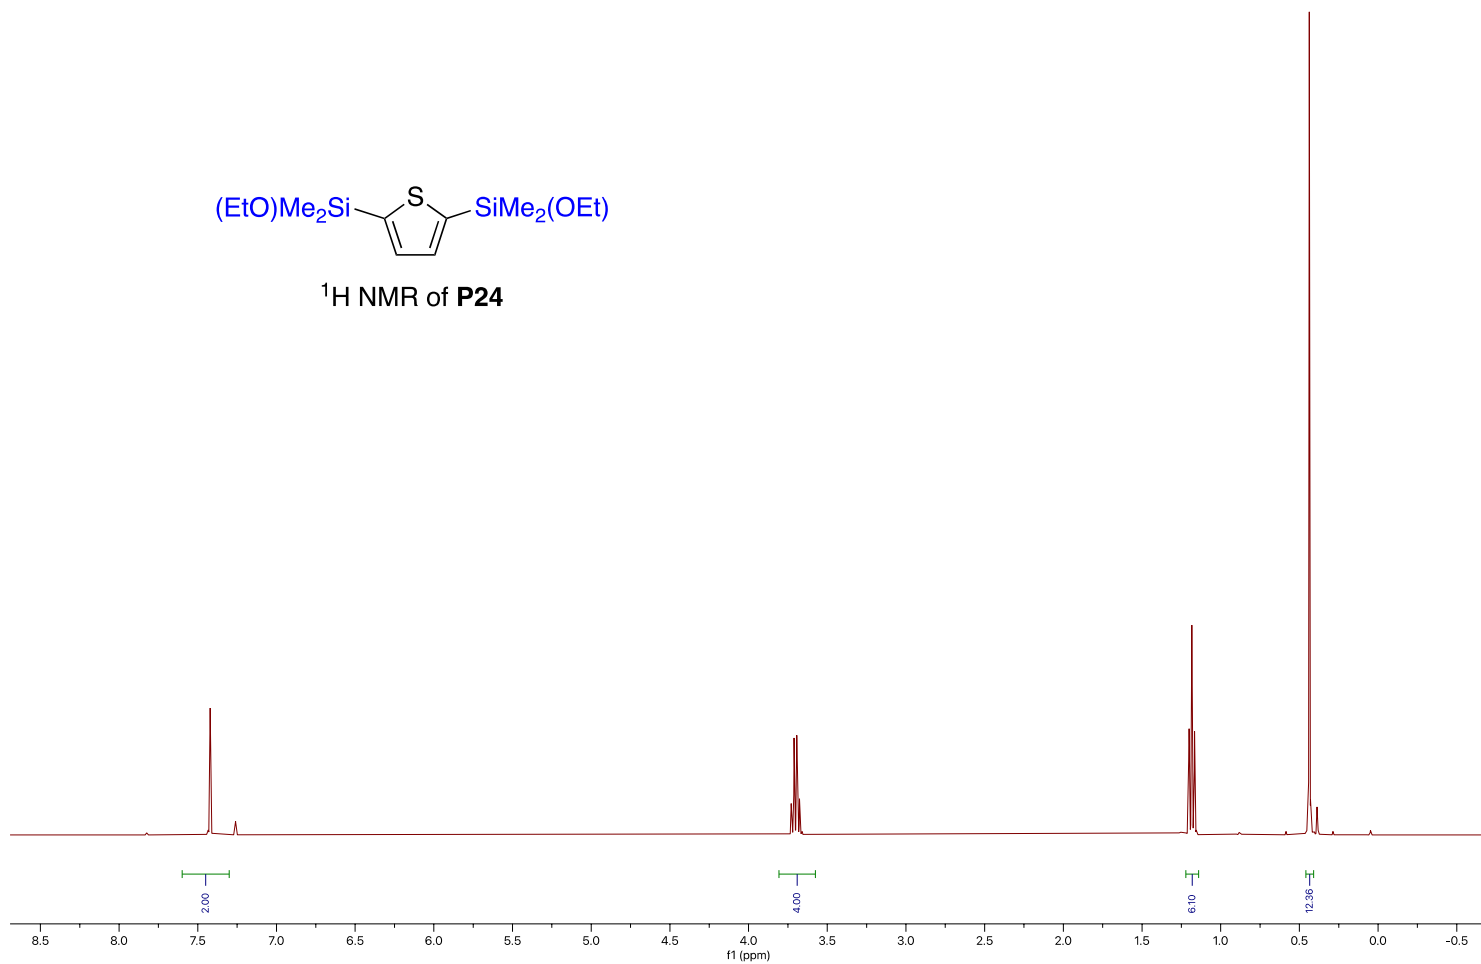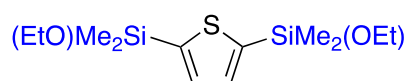 $^{13}\text{C}$  NMR of **P24**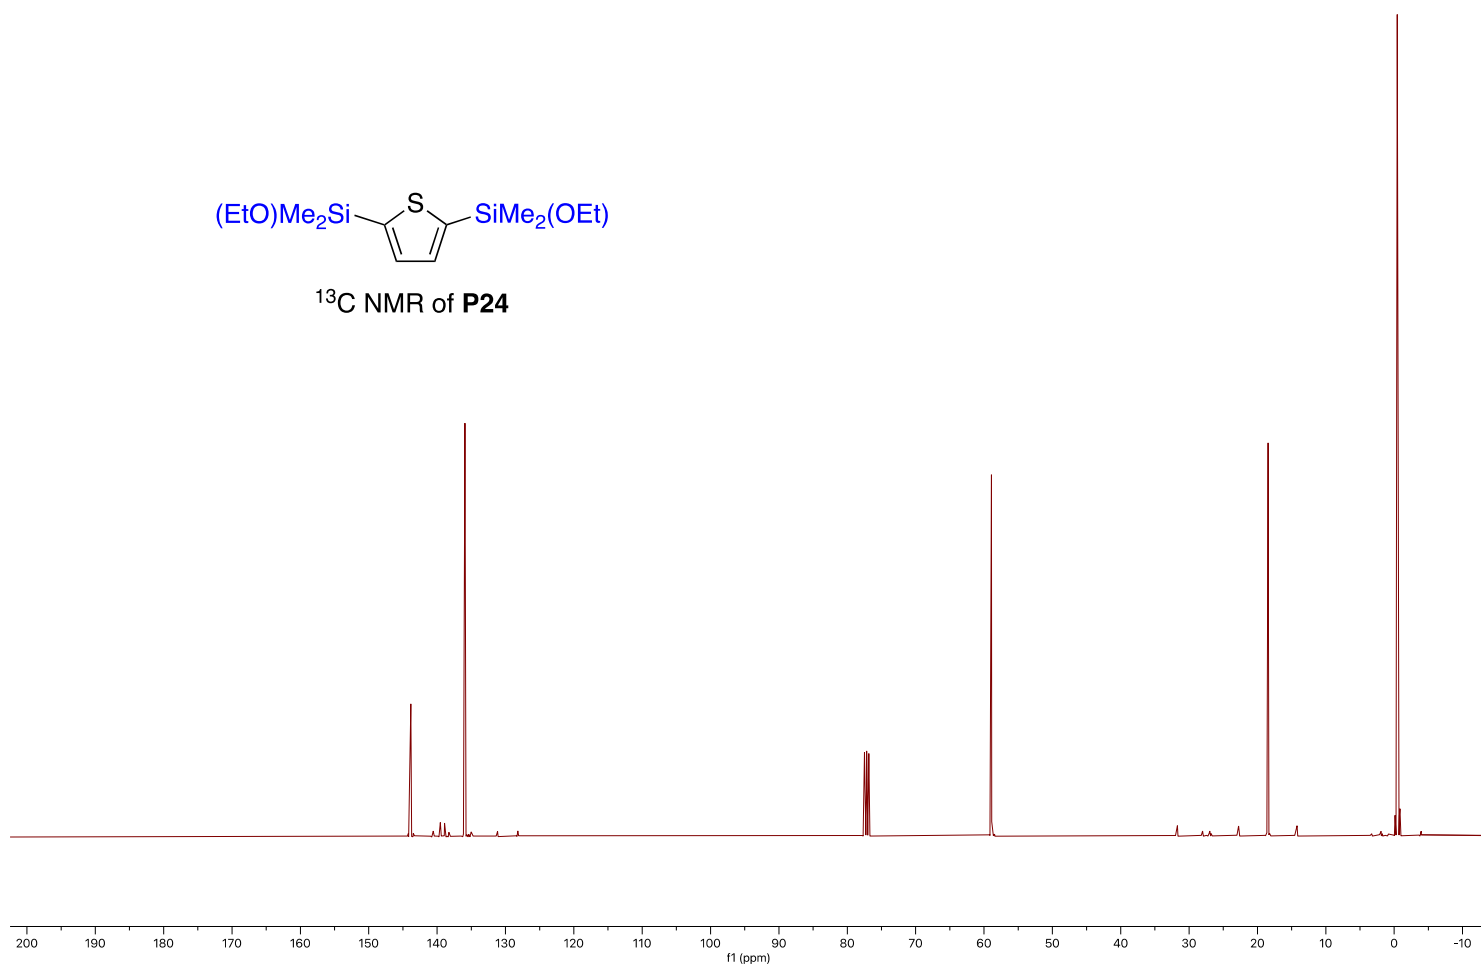

## 5.3 Siloxane Products

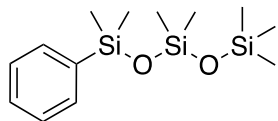 $^1\text{H}$  NMR of **P1b**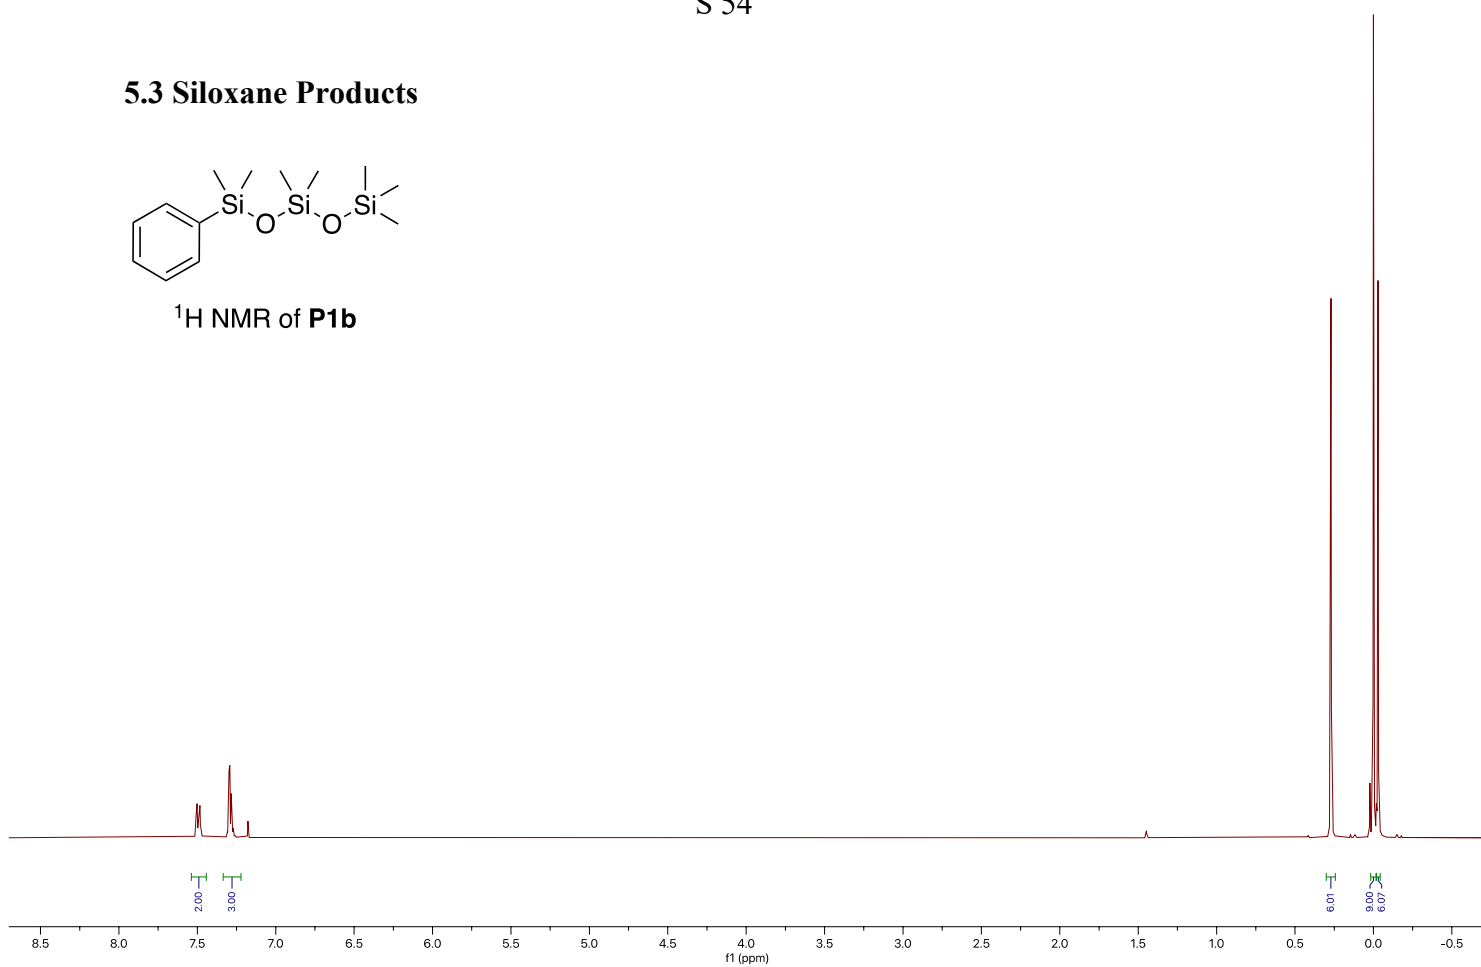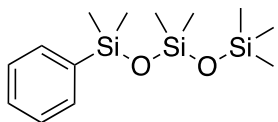 $^{13}\text{C}$  NMR of **P1b**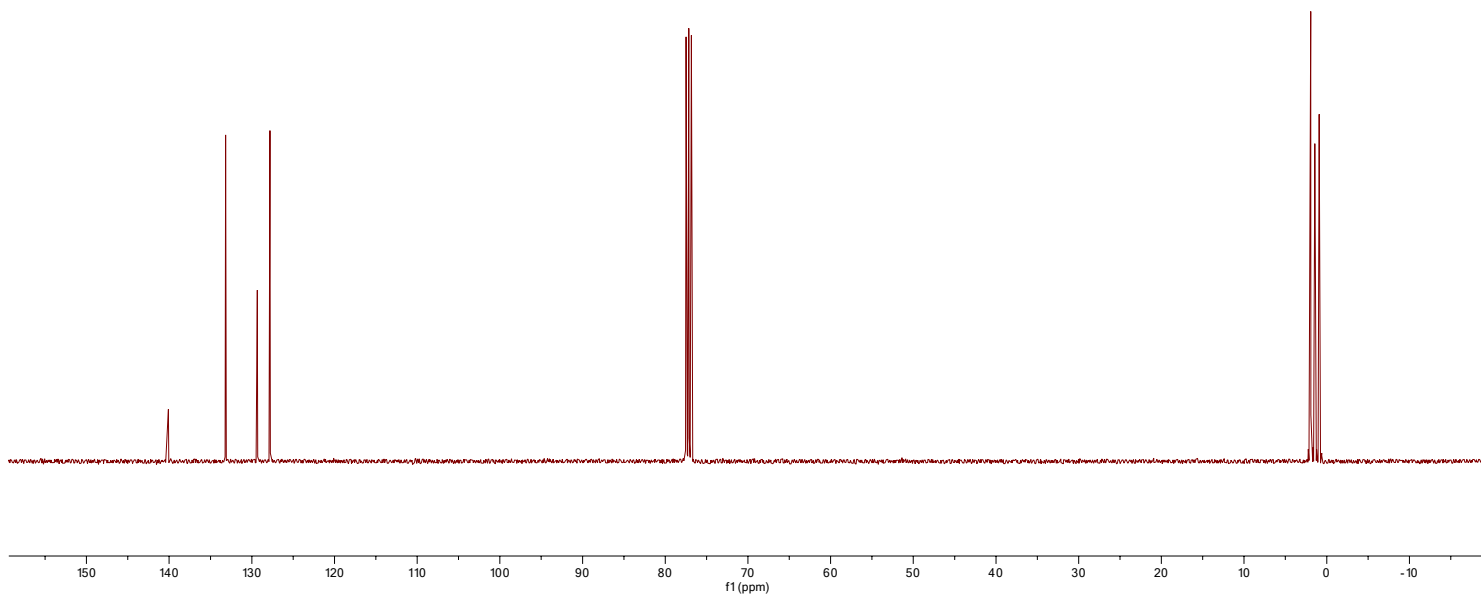

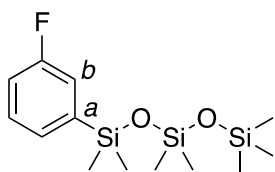 $^1\text{H}$  NMR of **P2b** ( $a:b=2.1:1$ )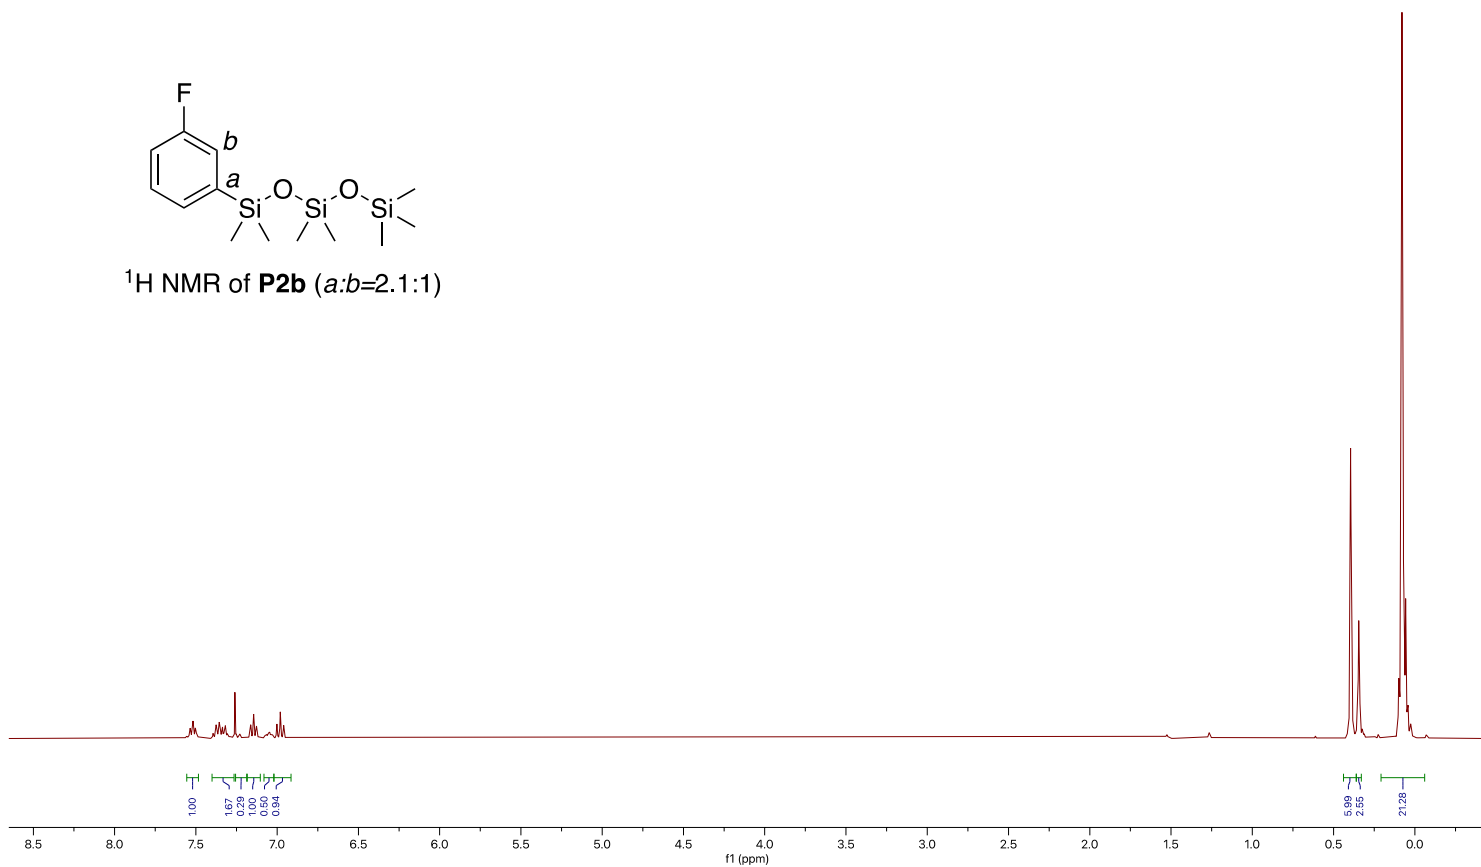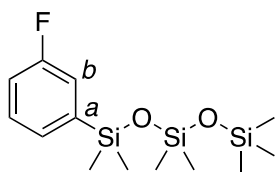 $^{13}\text{C}$  NMR of **P2b** ( $a:b=2.1:1$ )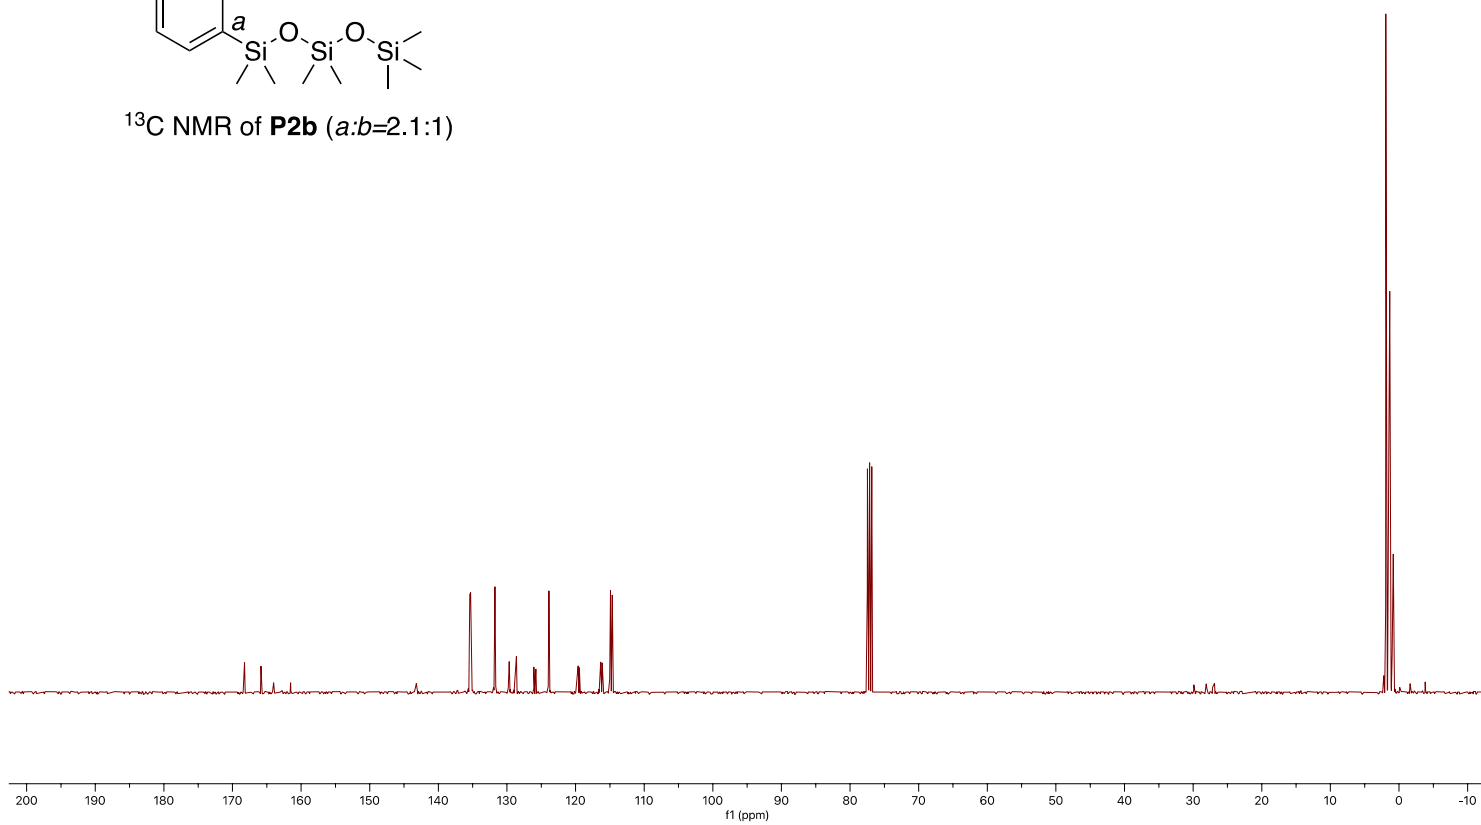



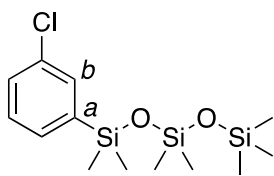 $^1\text{H}$  NMR of **P6b** ( $a:b=2.1:1$ )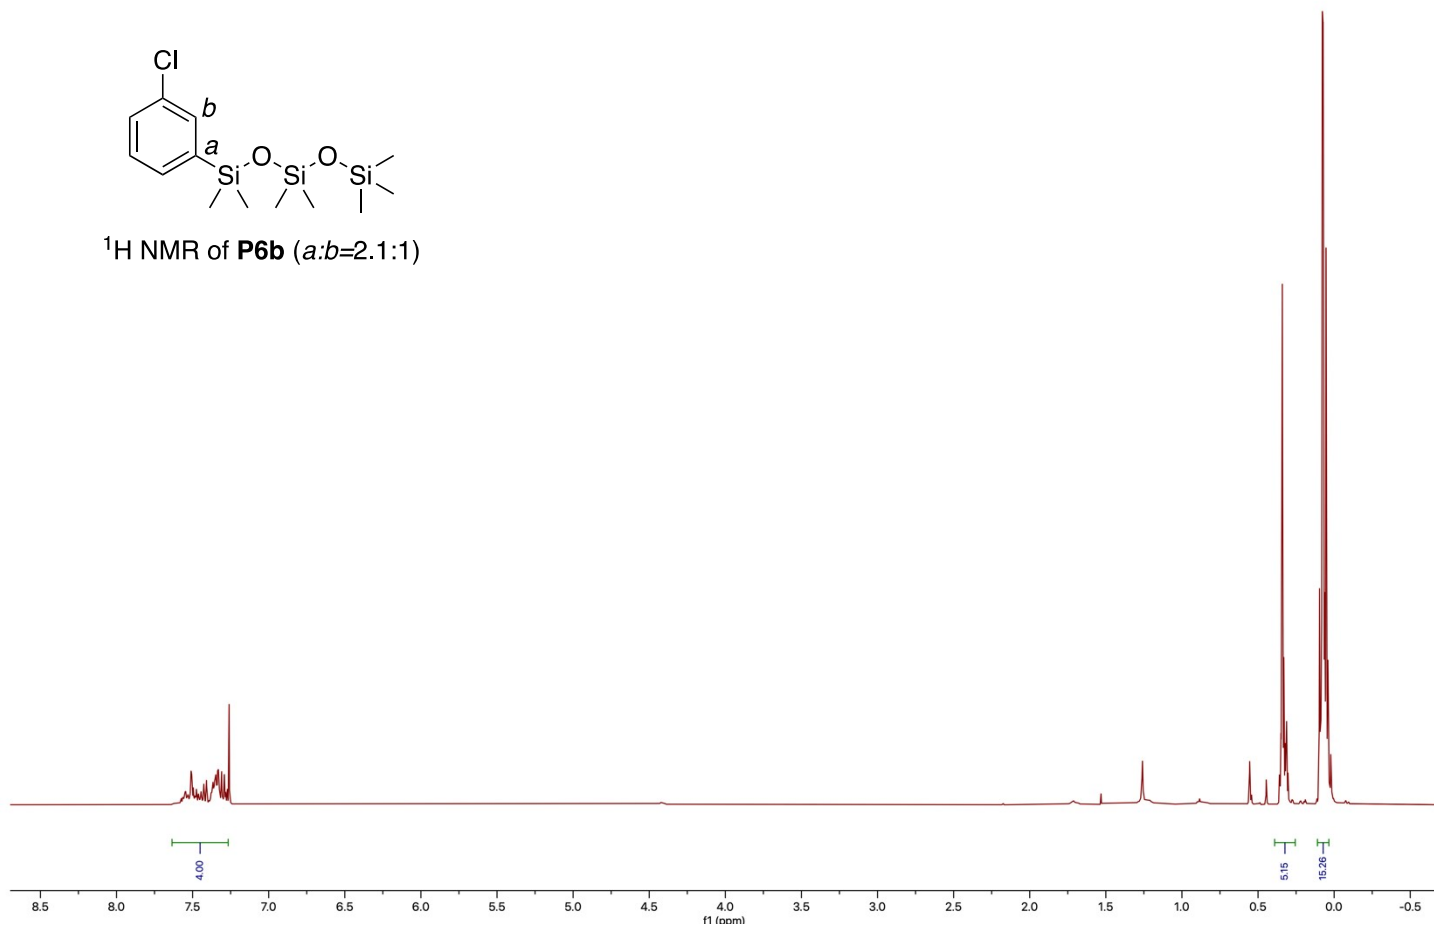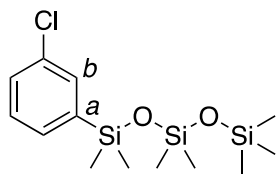 $^{13}\text{C}$  NMR of **P6b** ( $a:b=2.1:1$ )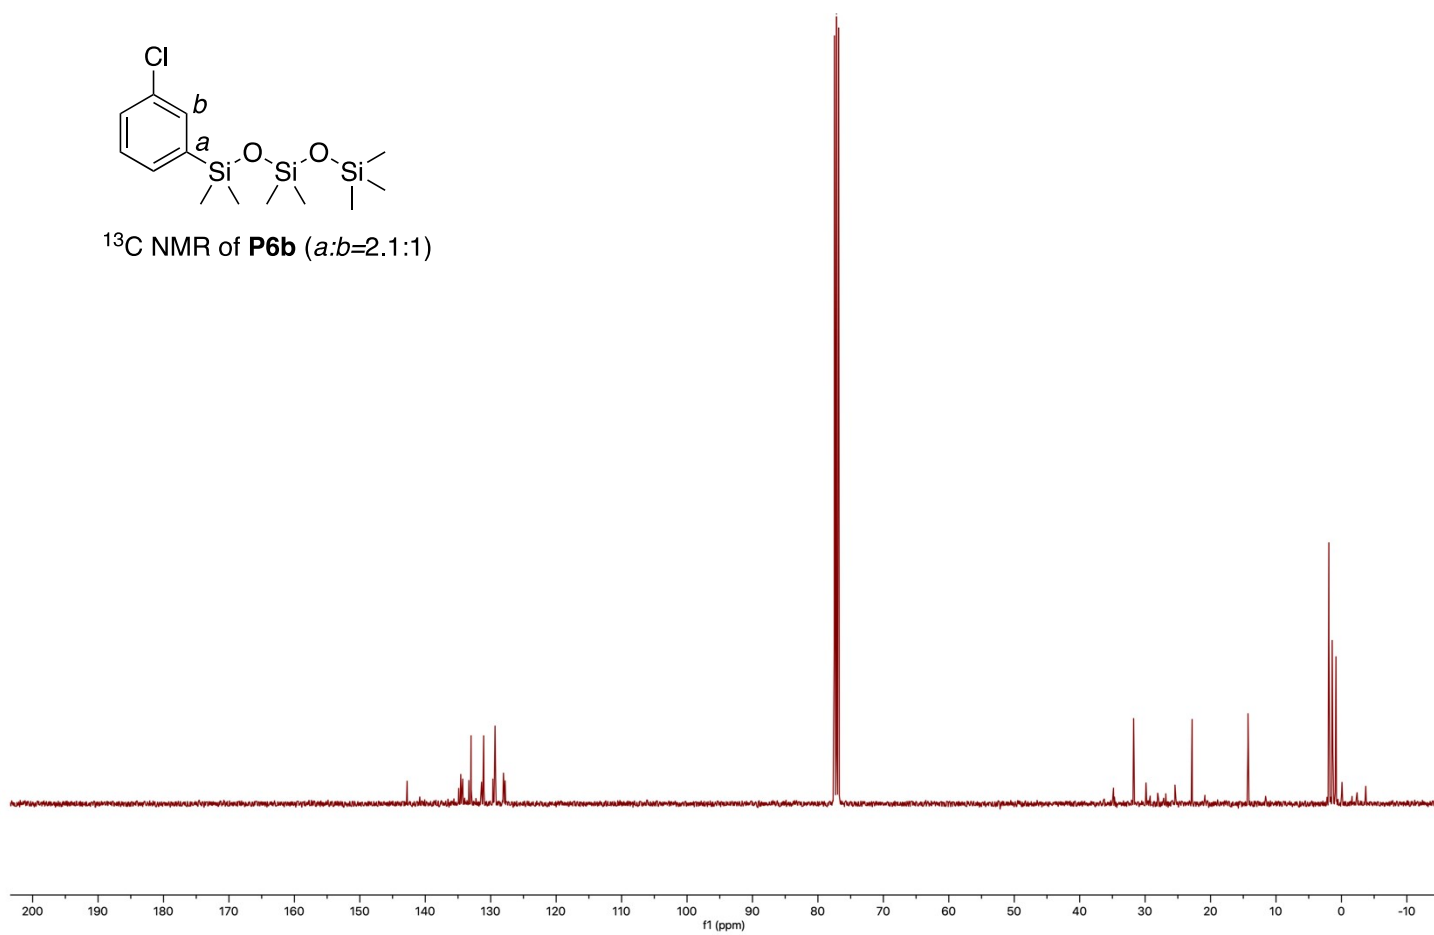

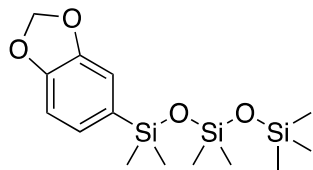<sup>1</sup>H NMR of P8b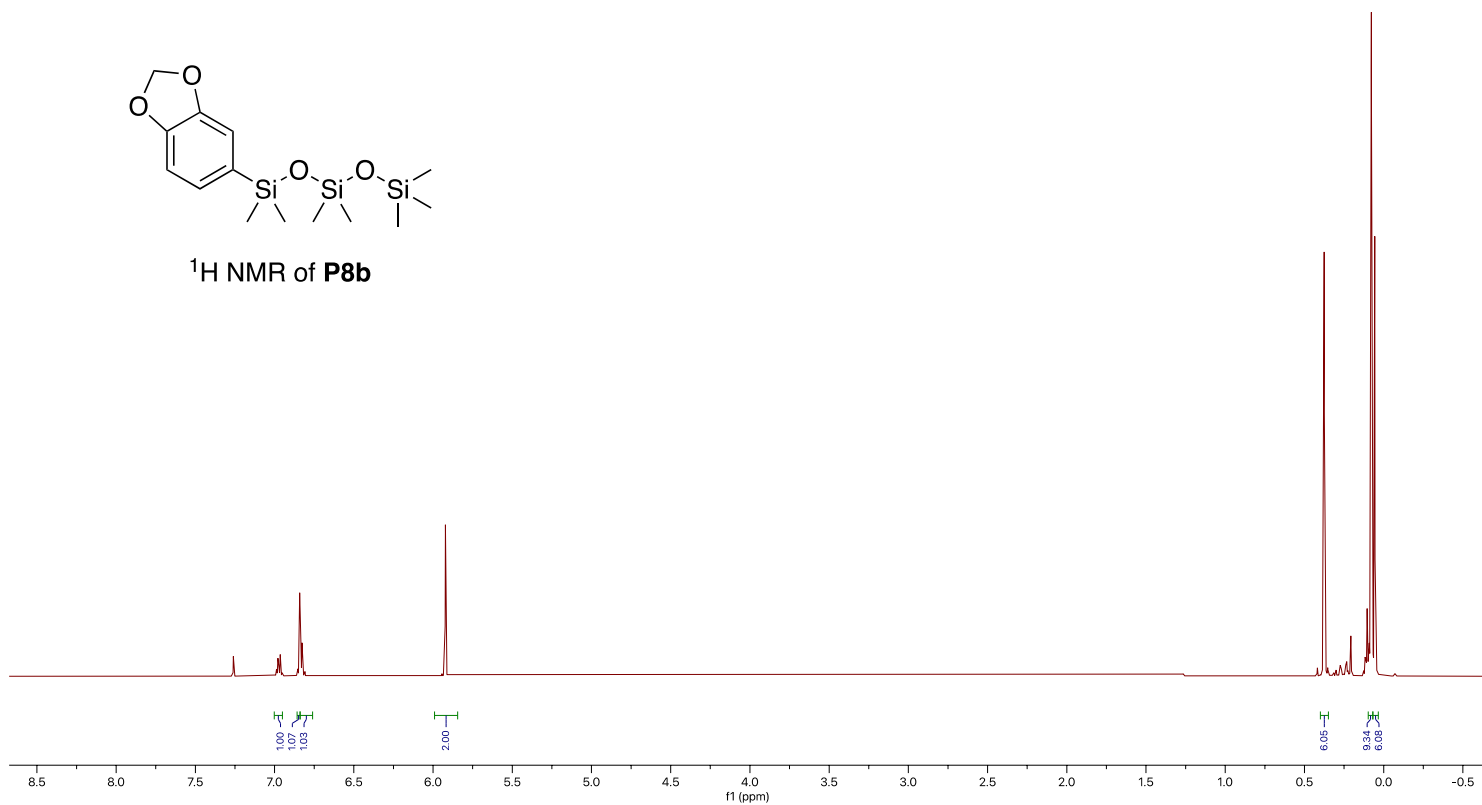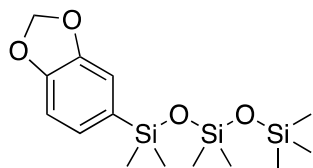<sup>13</sup>C NMR of P8b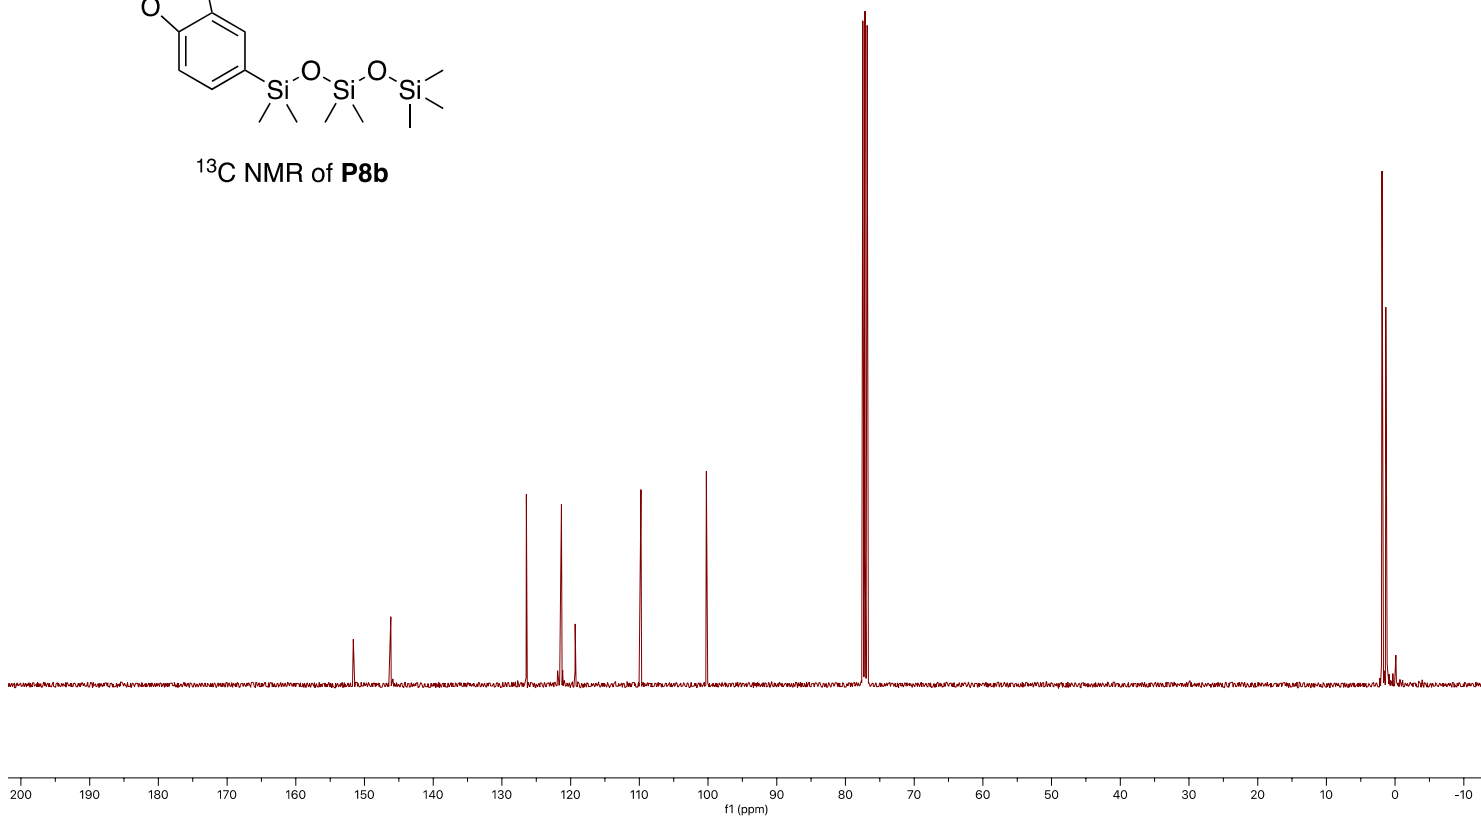

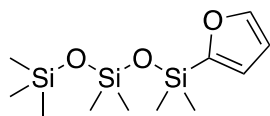 $^1\text{H}$  NMR of **P16b**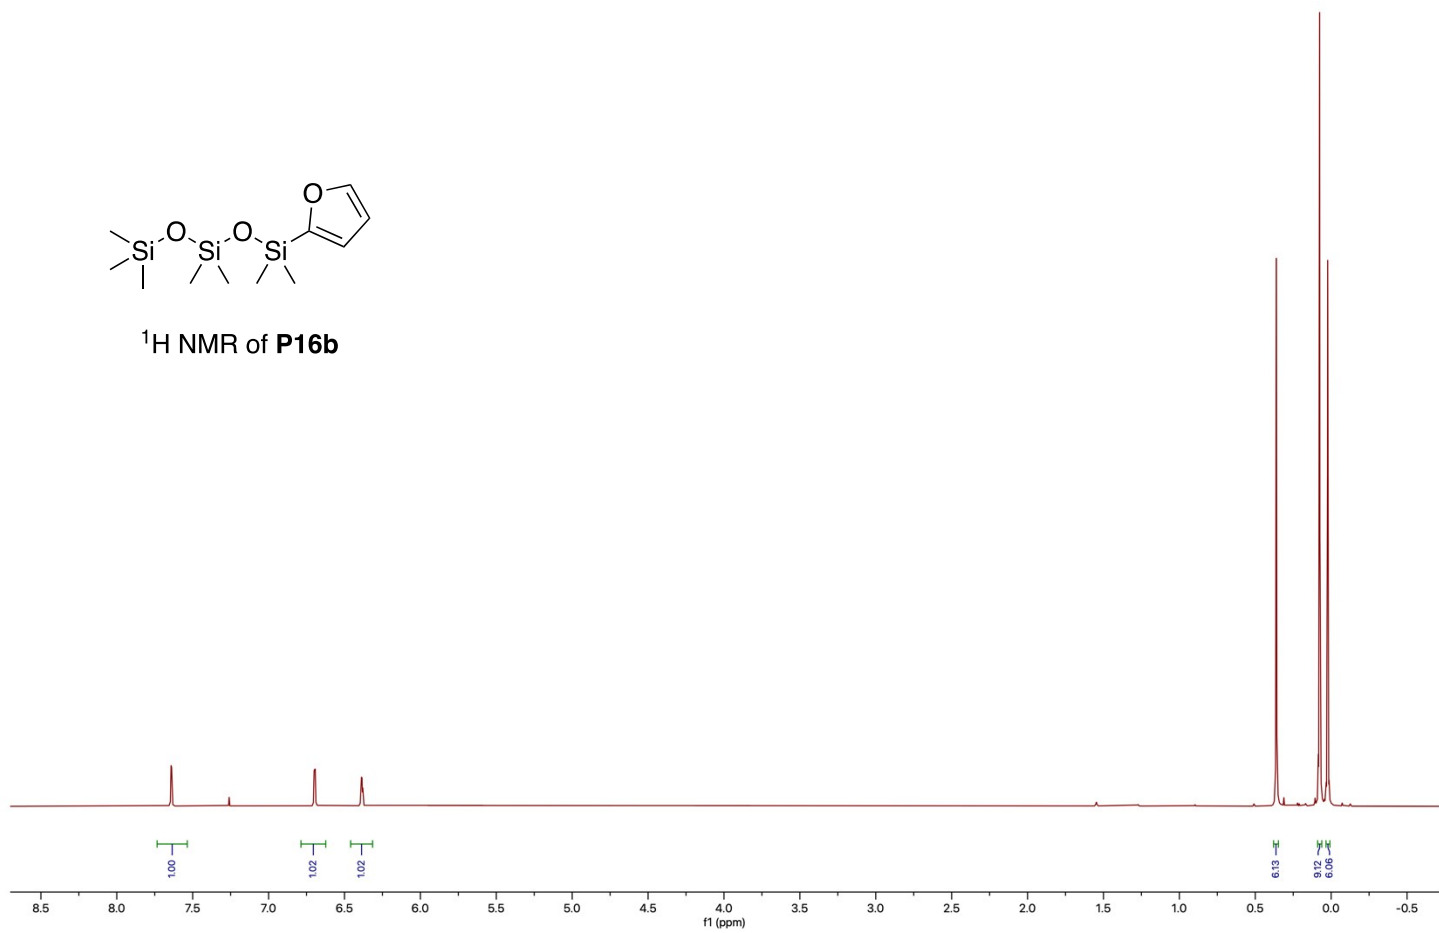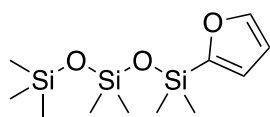 $^{13}\text{C}$  NMR of **P16b**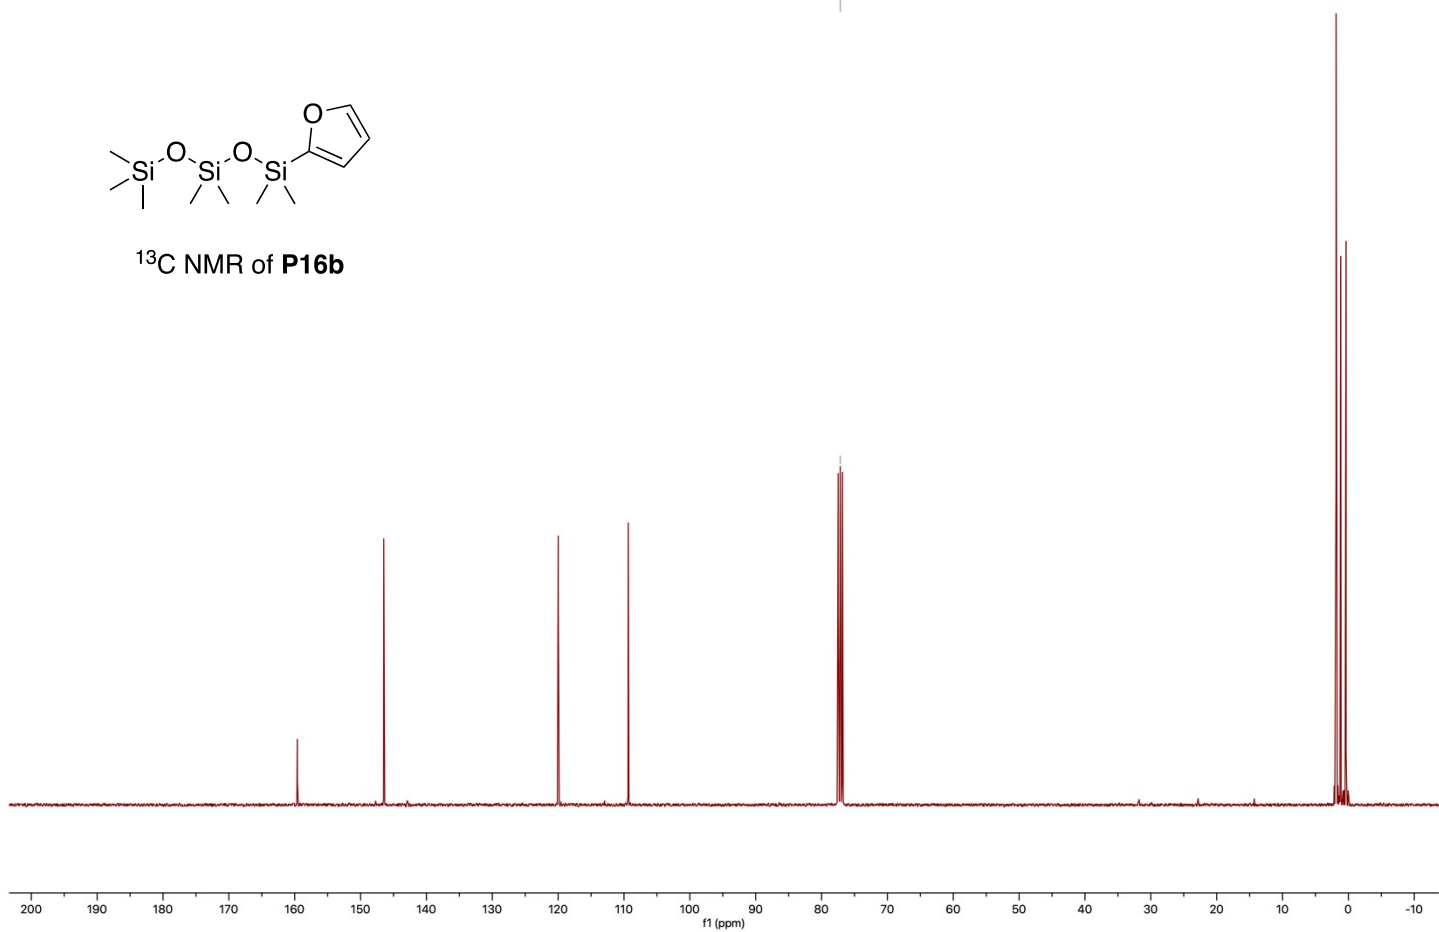

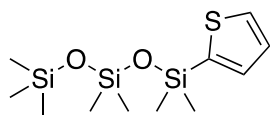 $^1\text{H}$  NMR of **P17b**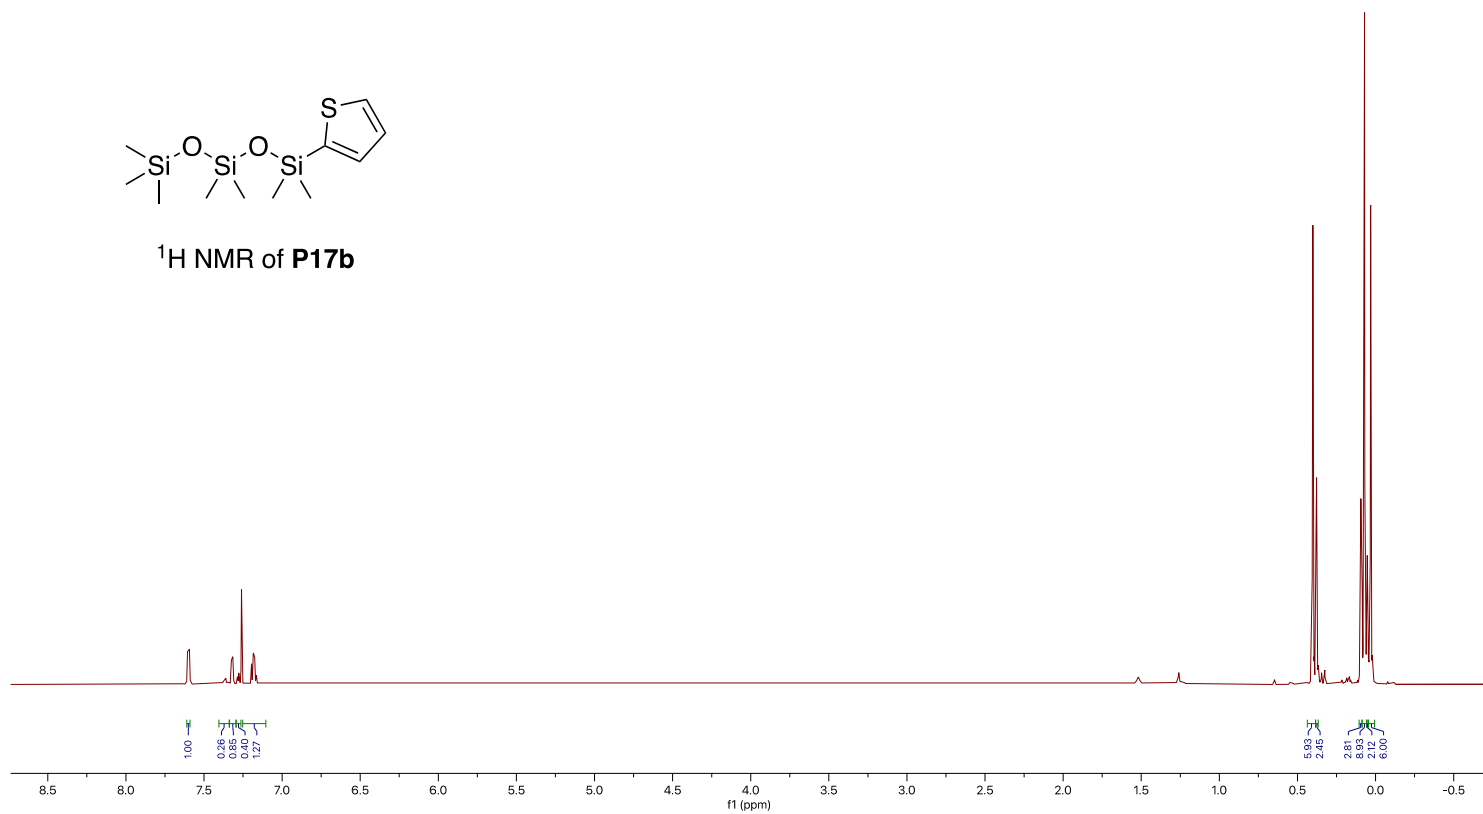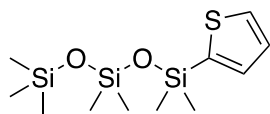 $^{13}\text{C}$  NMR of **P17b**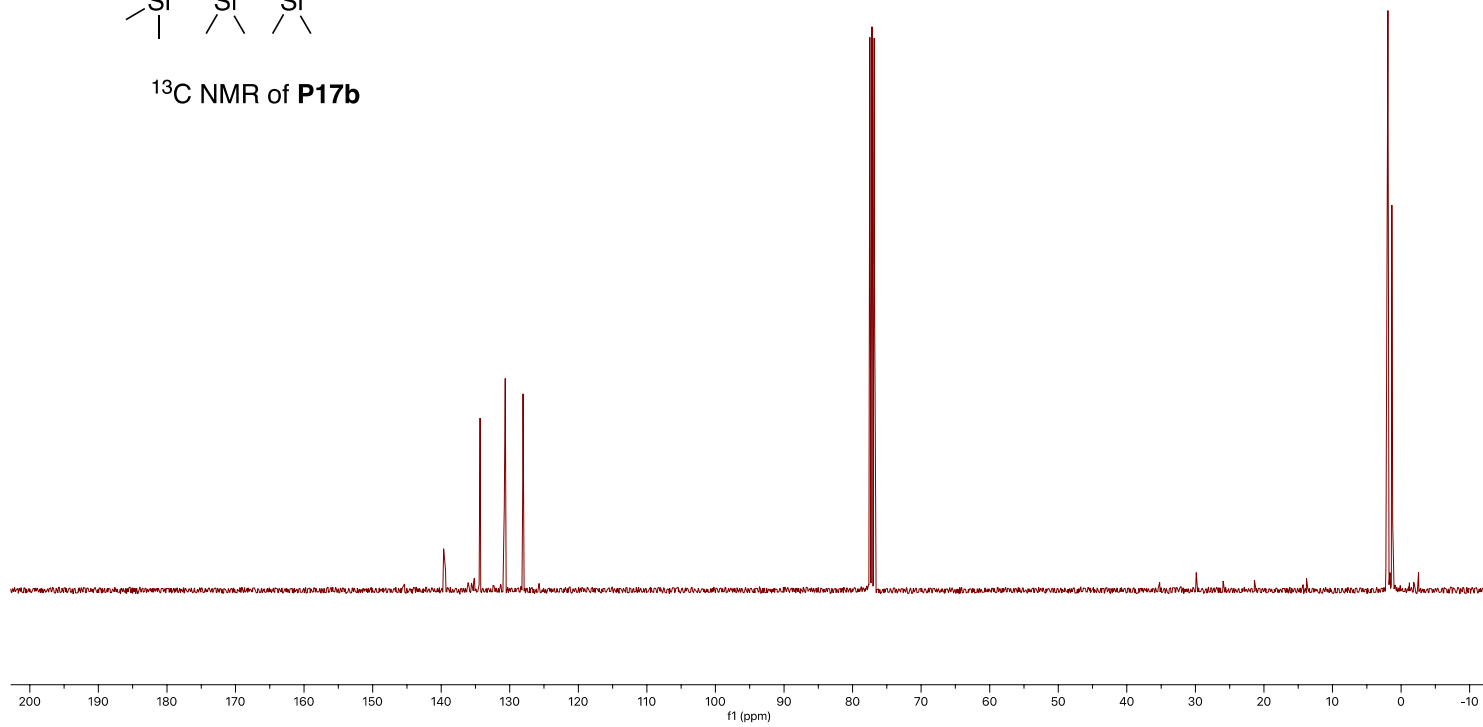

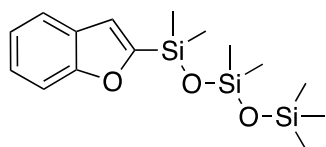**<sup>1</sup>H NMR of P20b**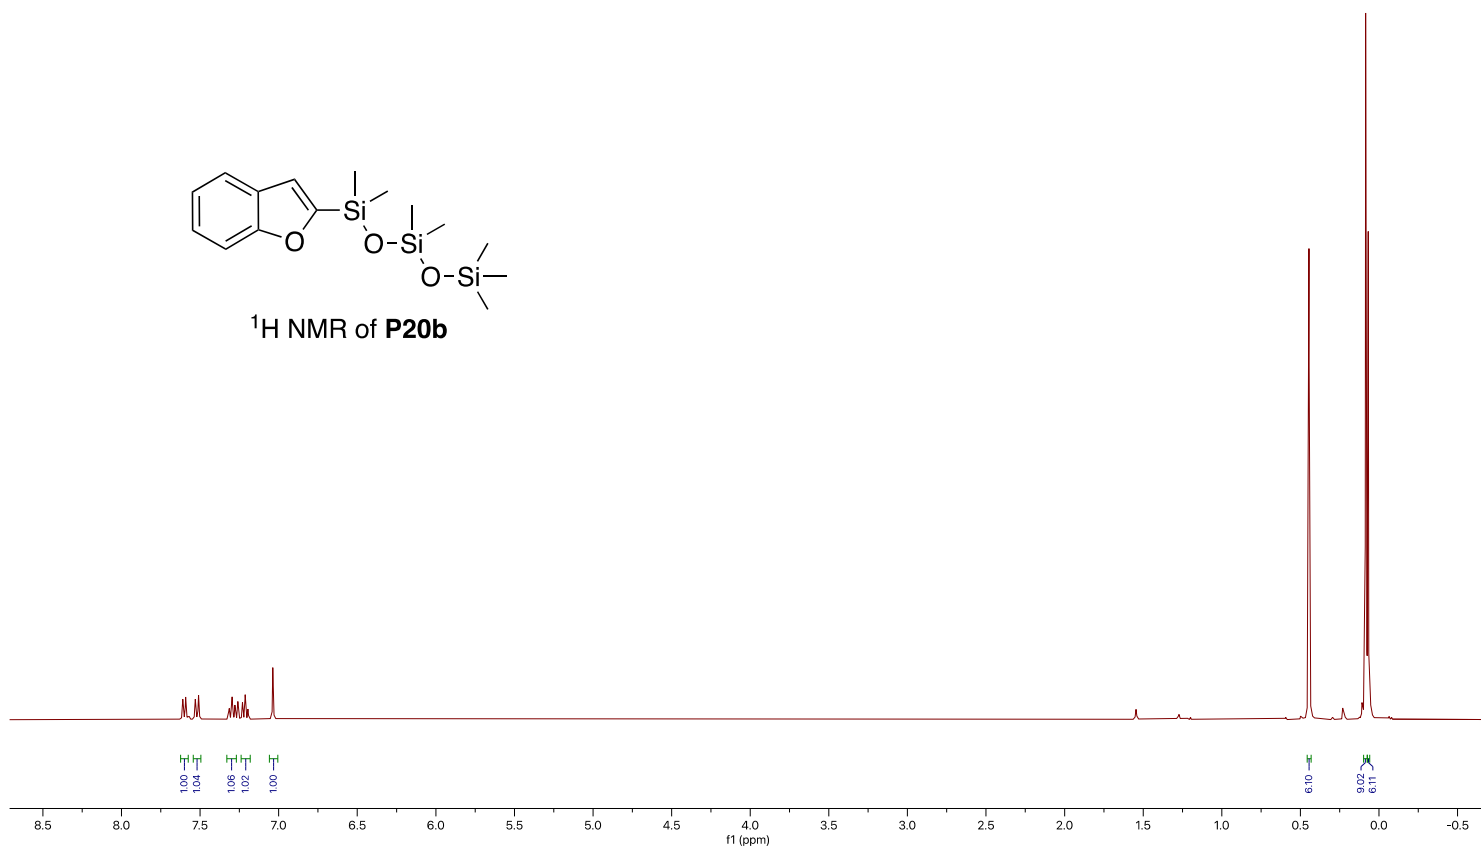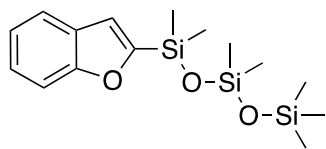**<sup>13</sup>C NMR of P20b**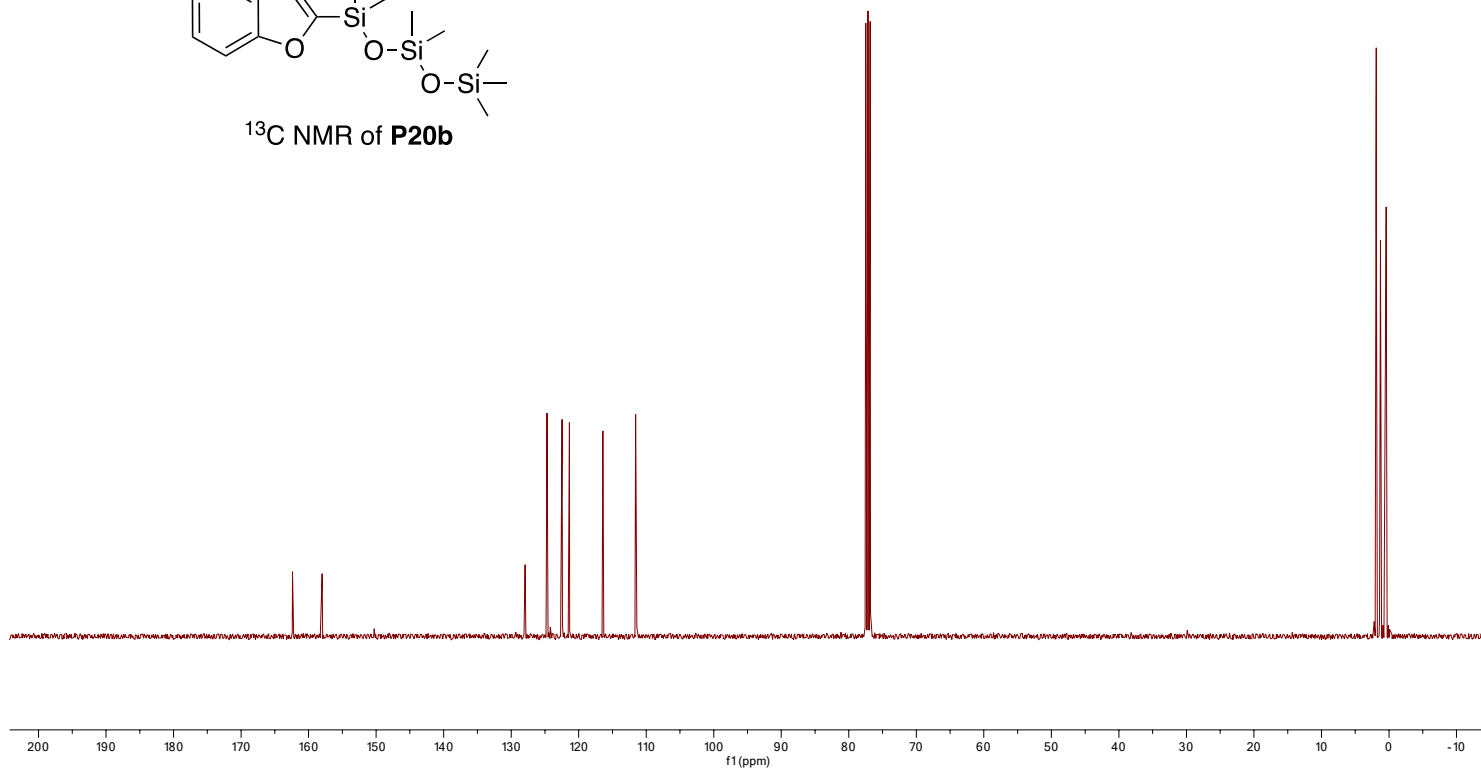

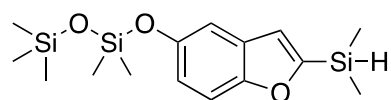**<sup>1</sup>H NMR of P21b**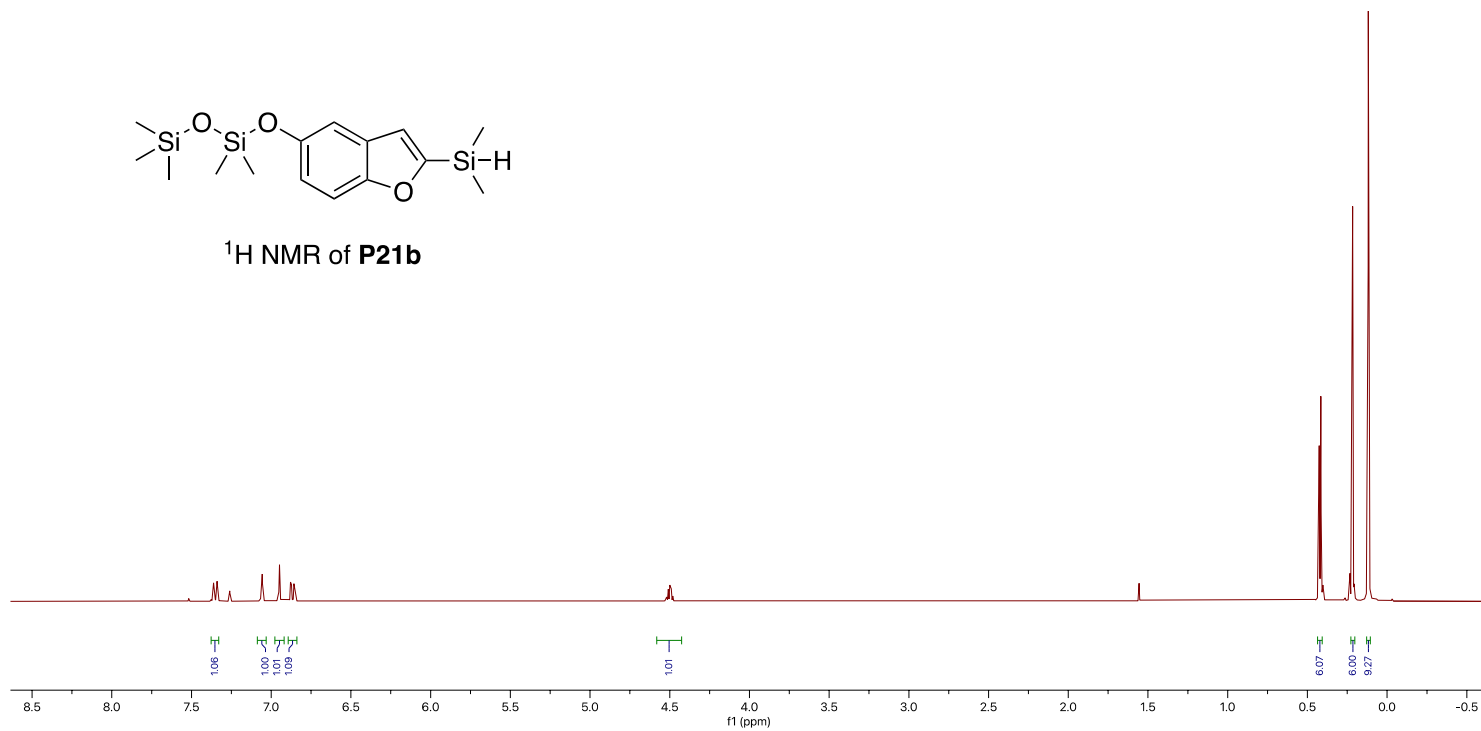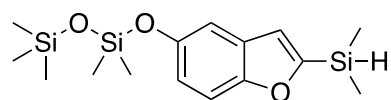**<sup>13</sup>C NMR of P21b**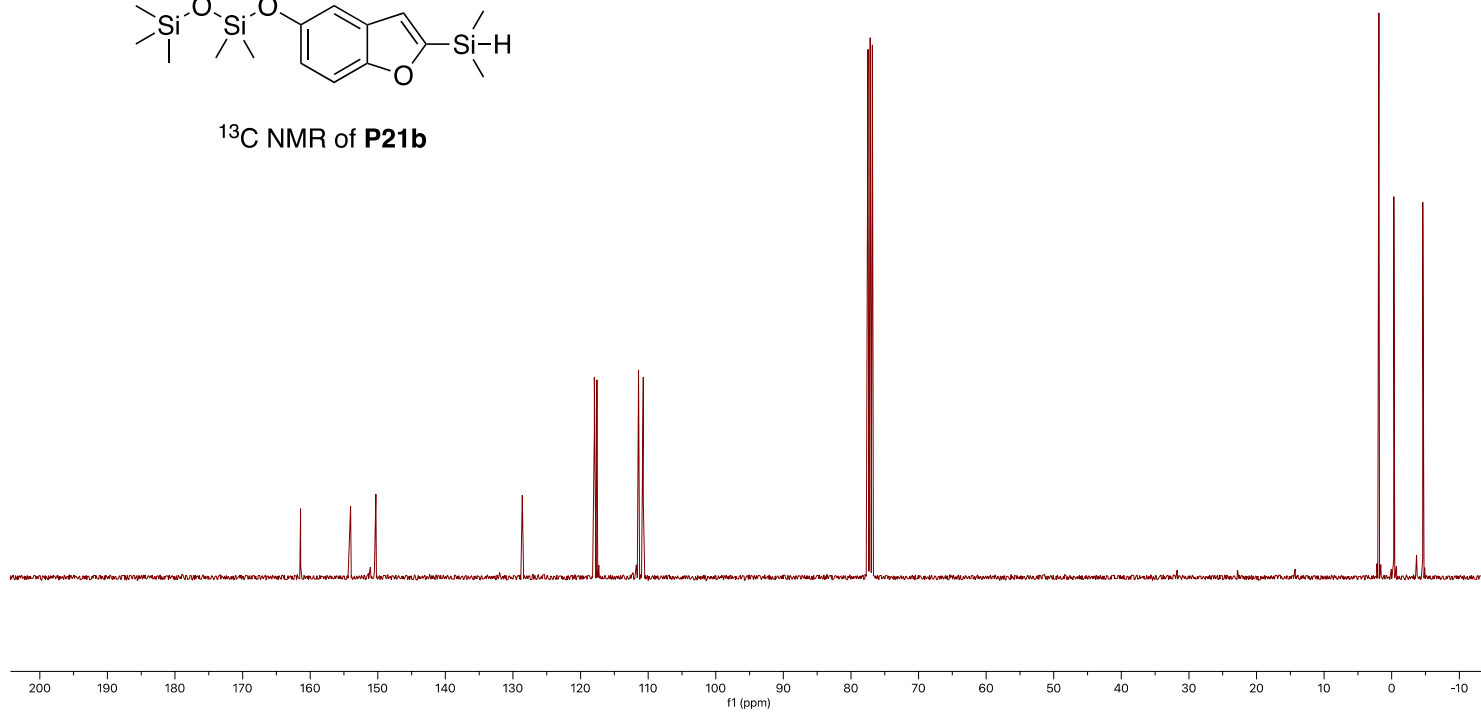

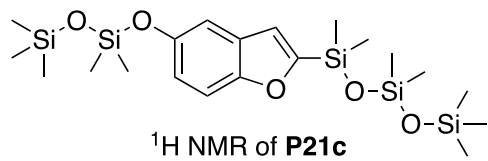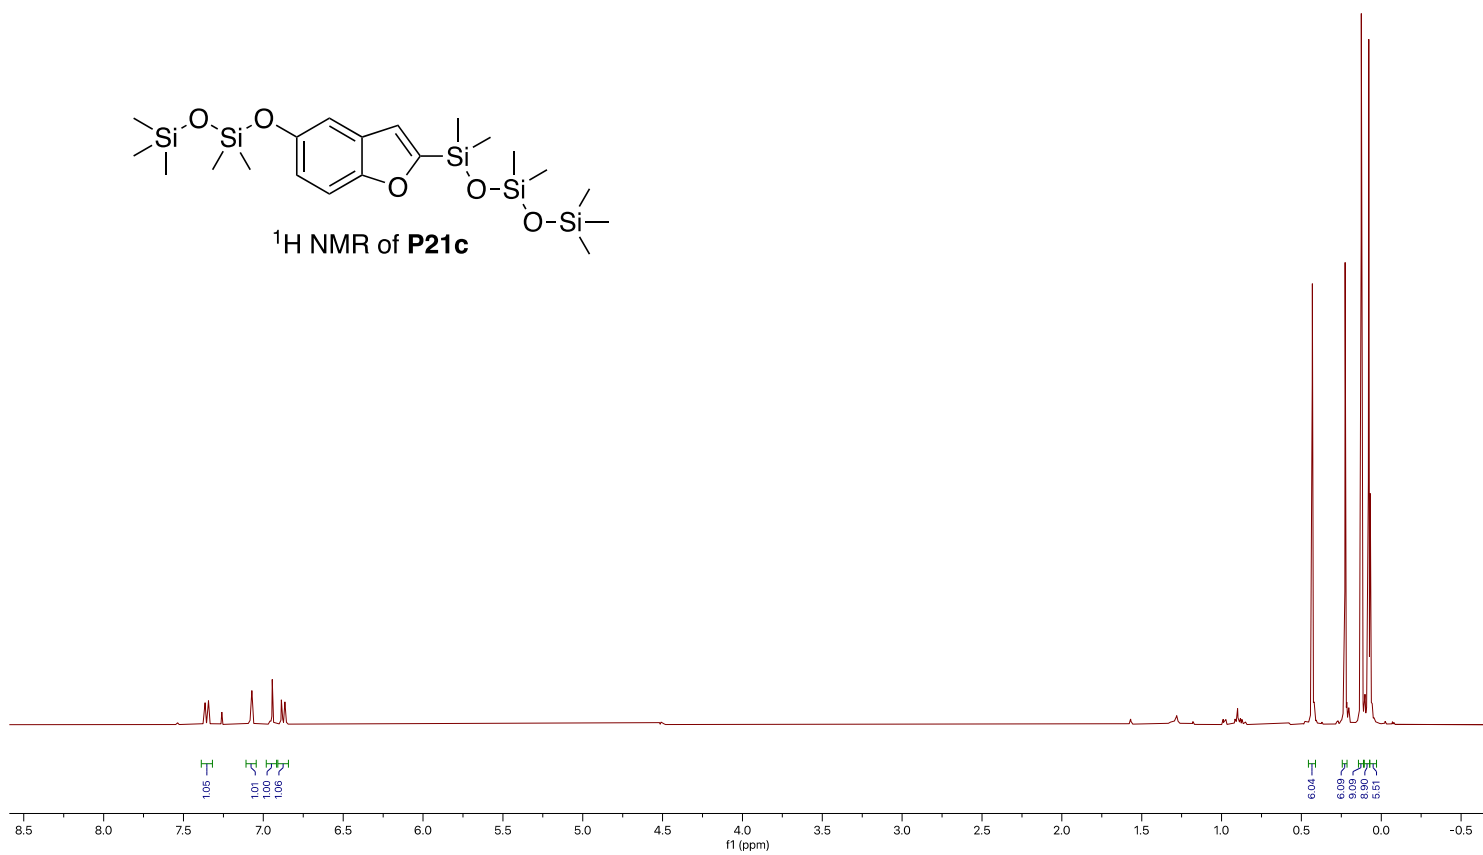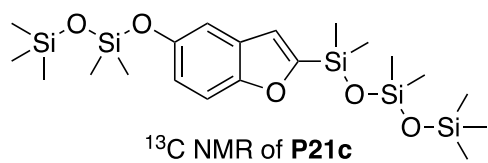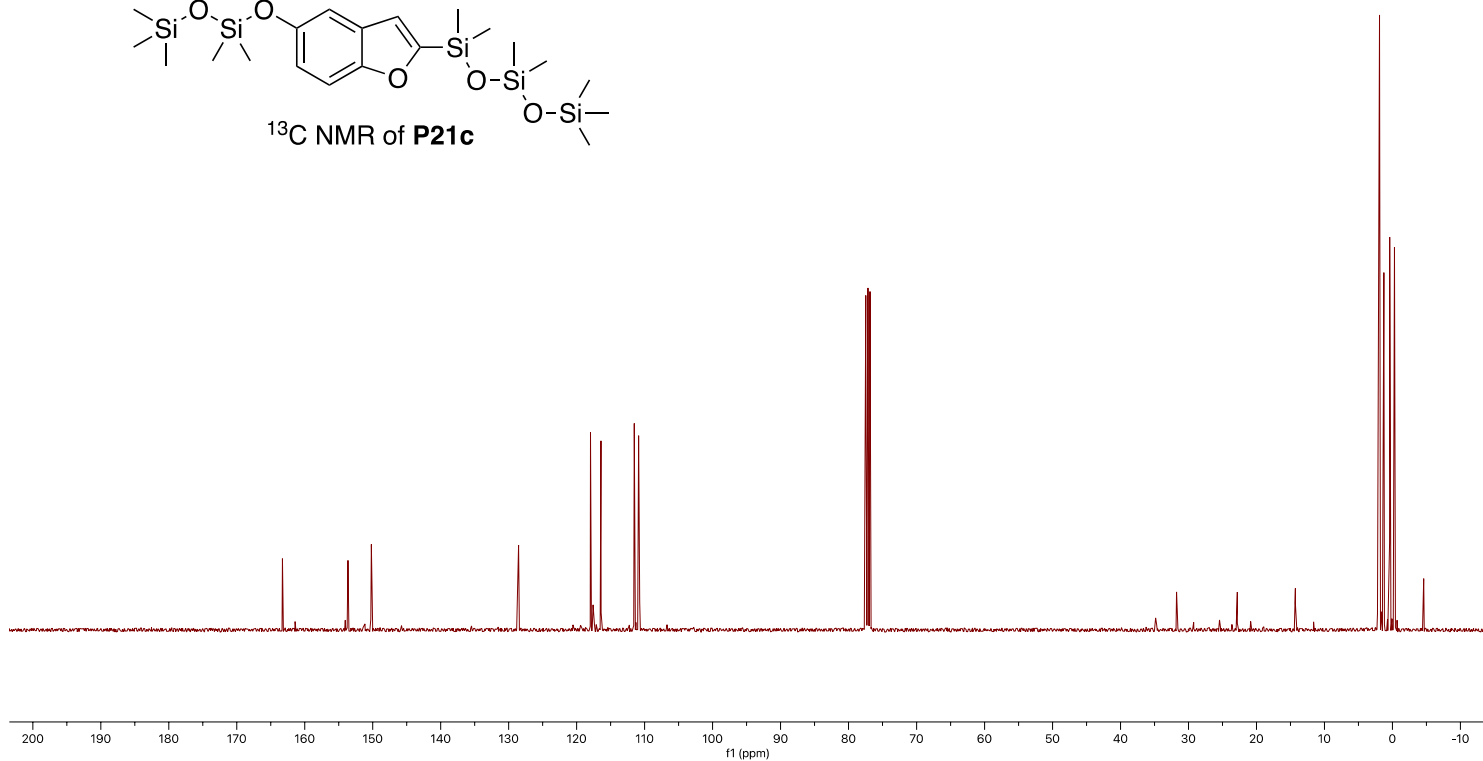

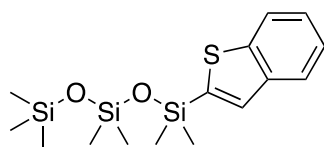 $^1\text{H}$  NMR of **P22b**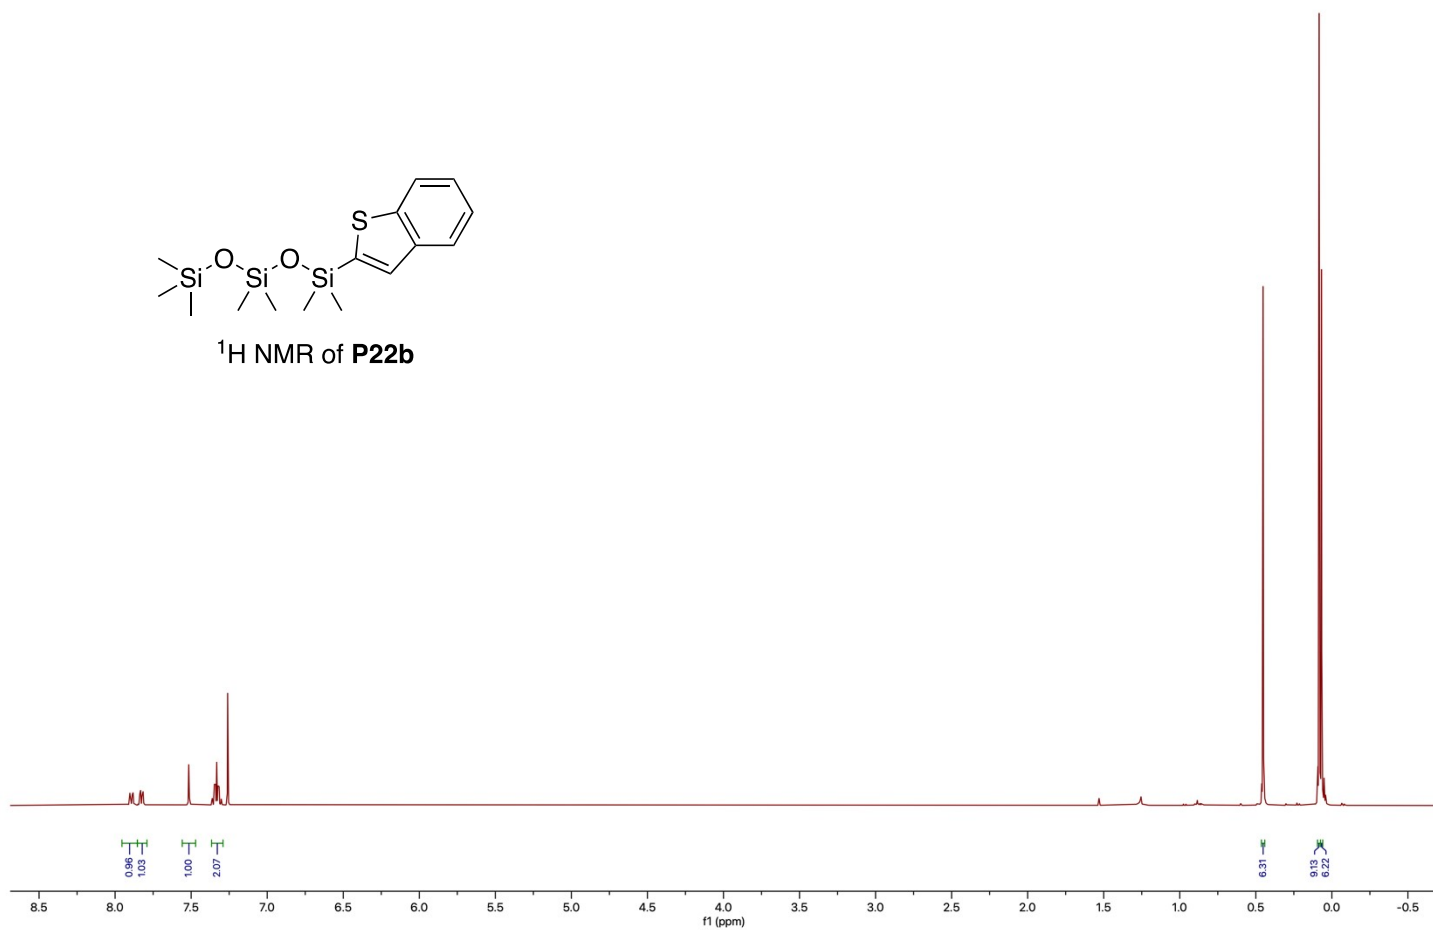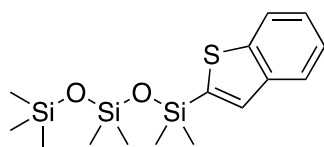 $^{13}\text{C}$  NMR of **P22b**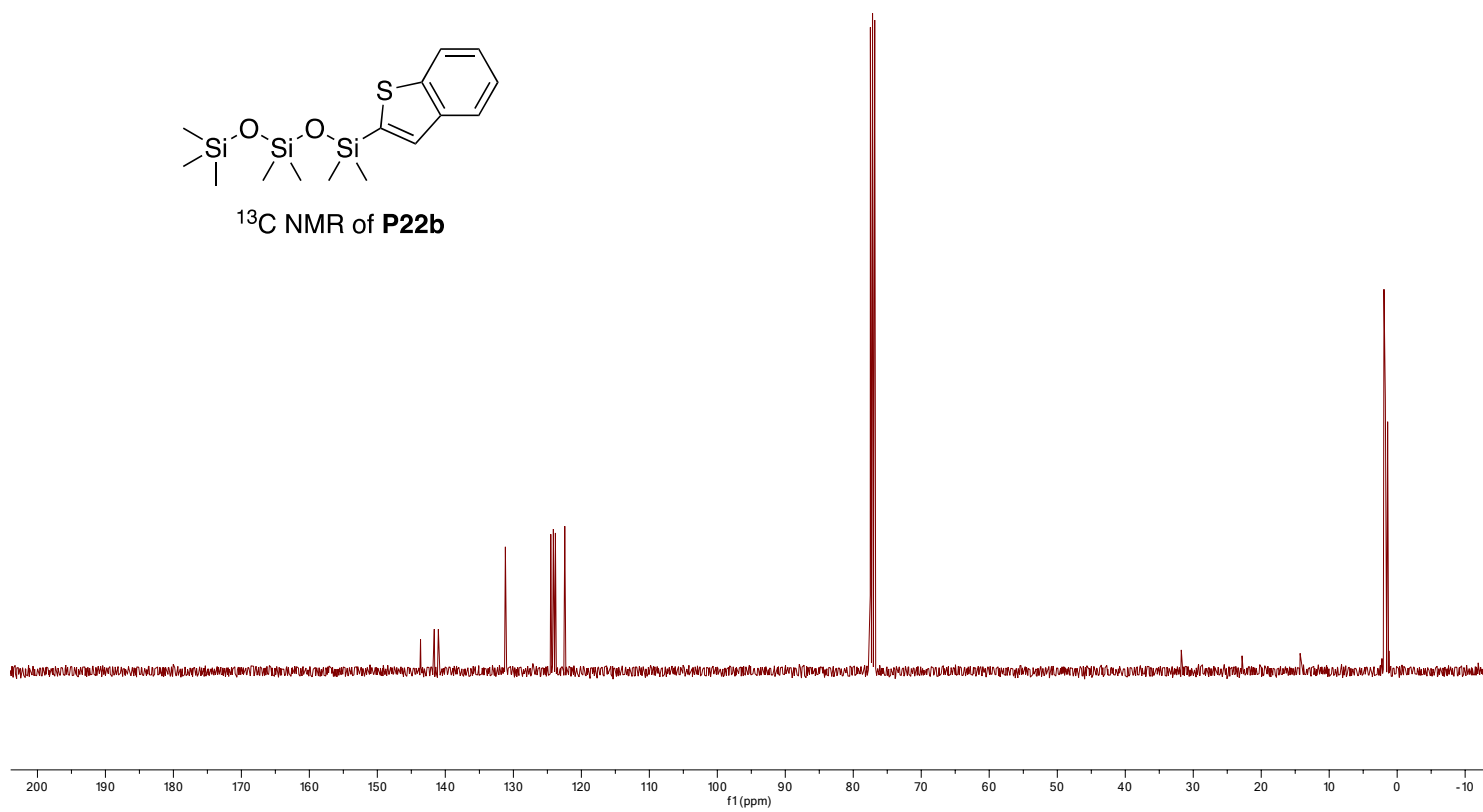



## 5.4 Rh complexes

 $[\text{RhCl}(\text{Ph-BPE})]_2$  (2)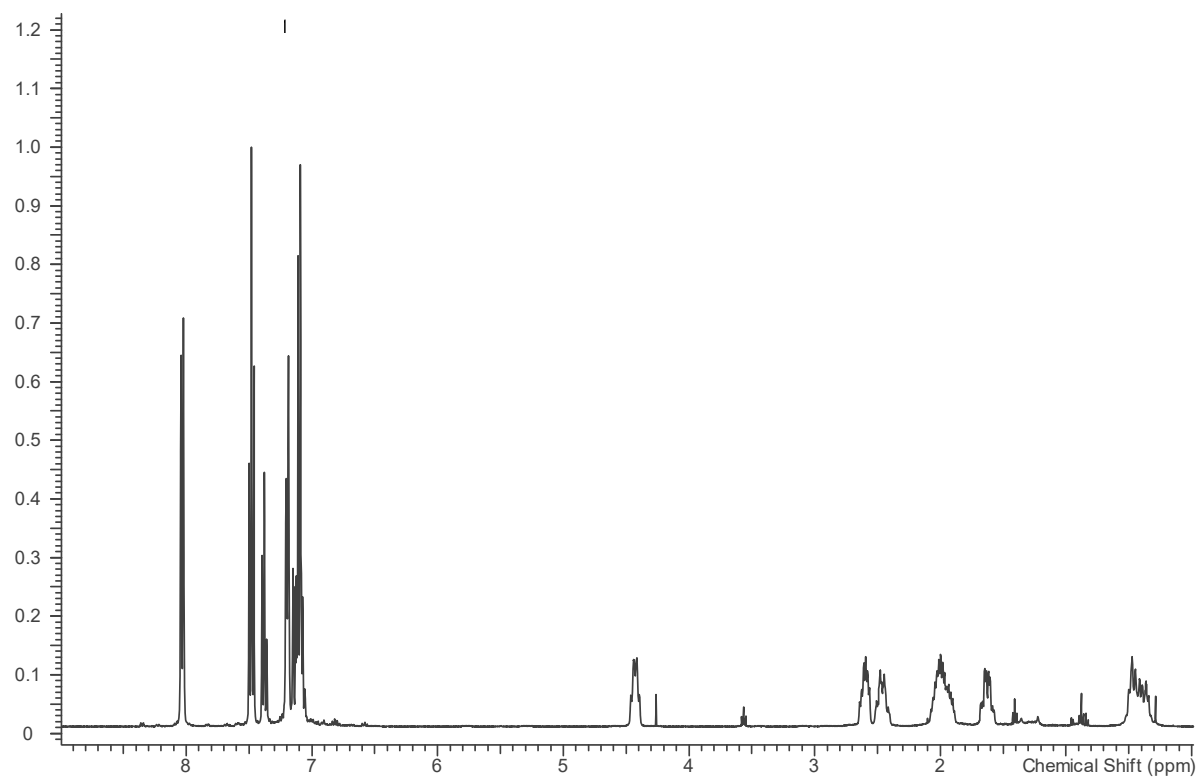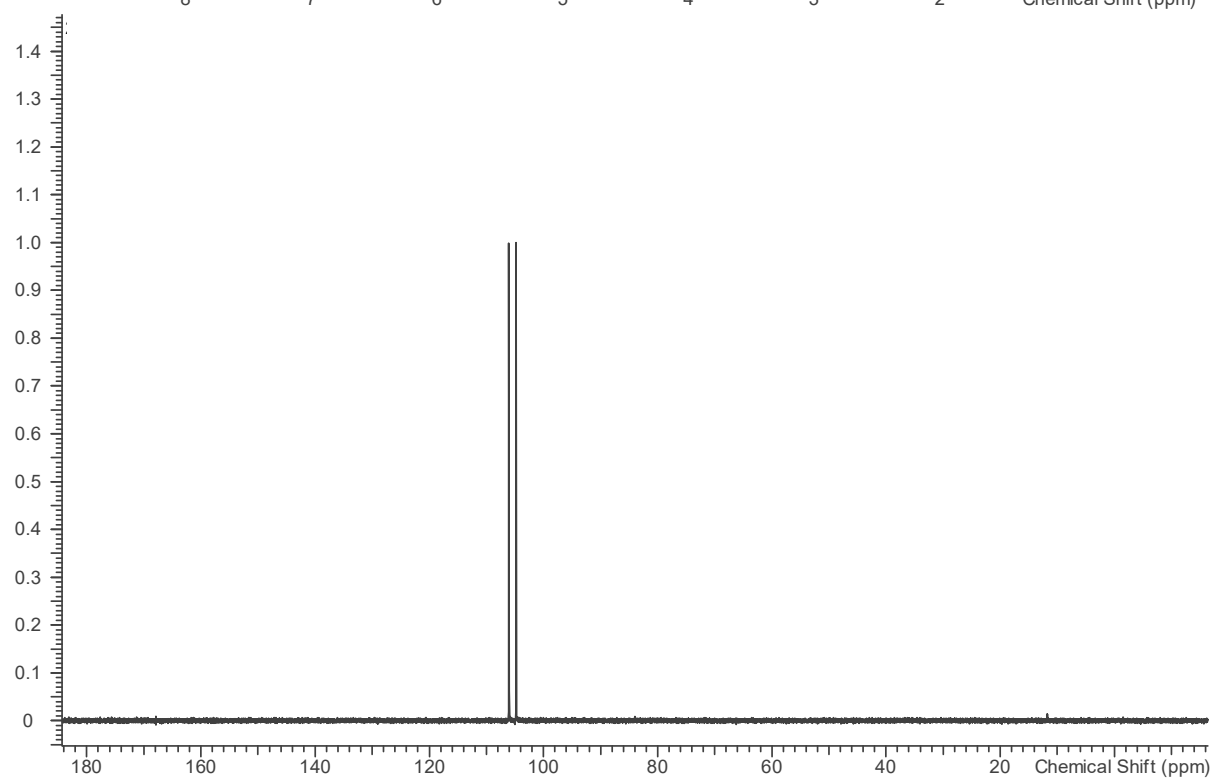

**[Rh<sub>2</sub>(Ph-BPE)<sub>2</sub>(μ-Cl)(μ-H)] (5)**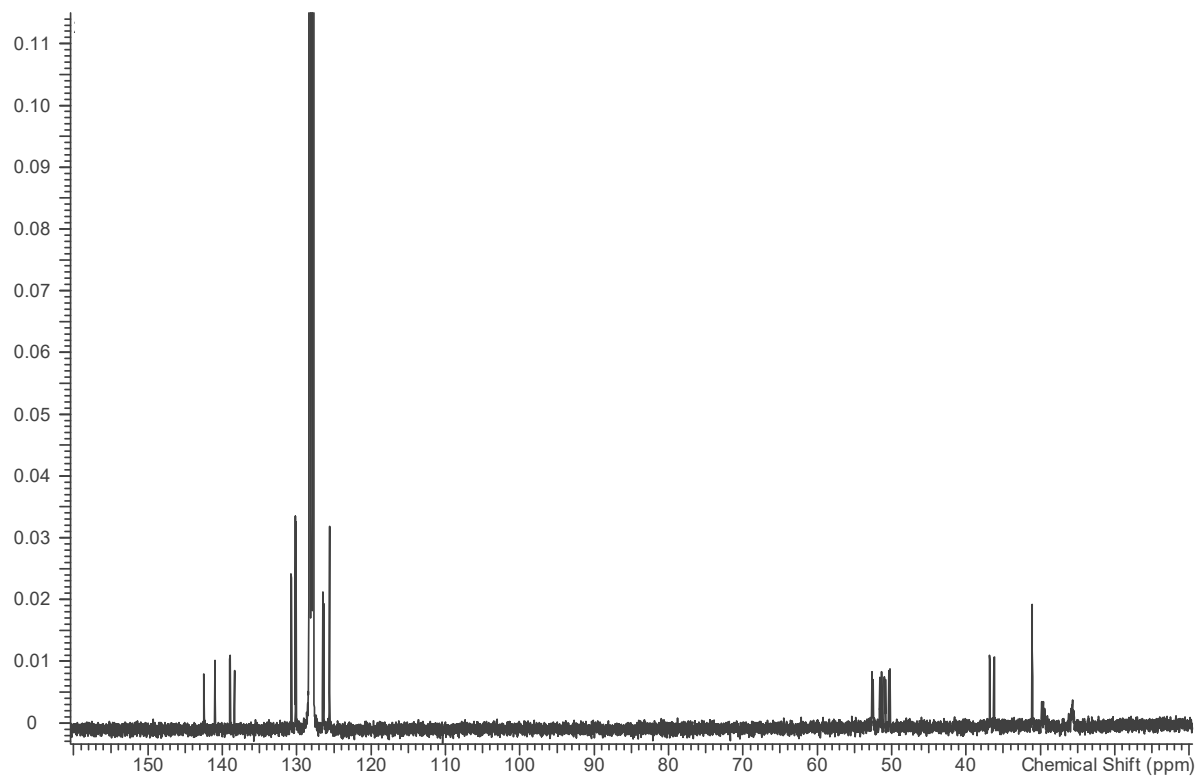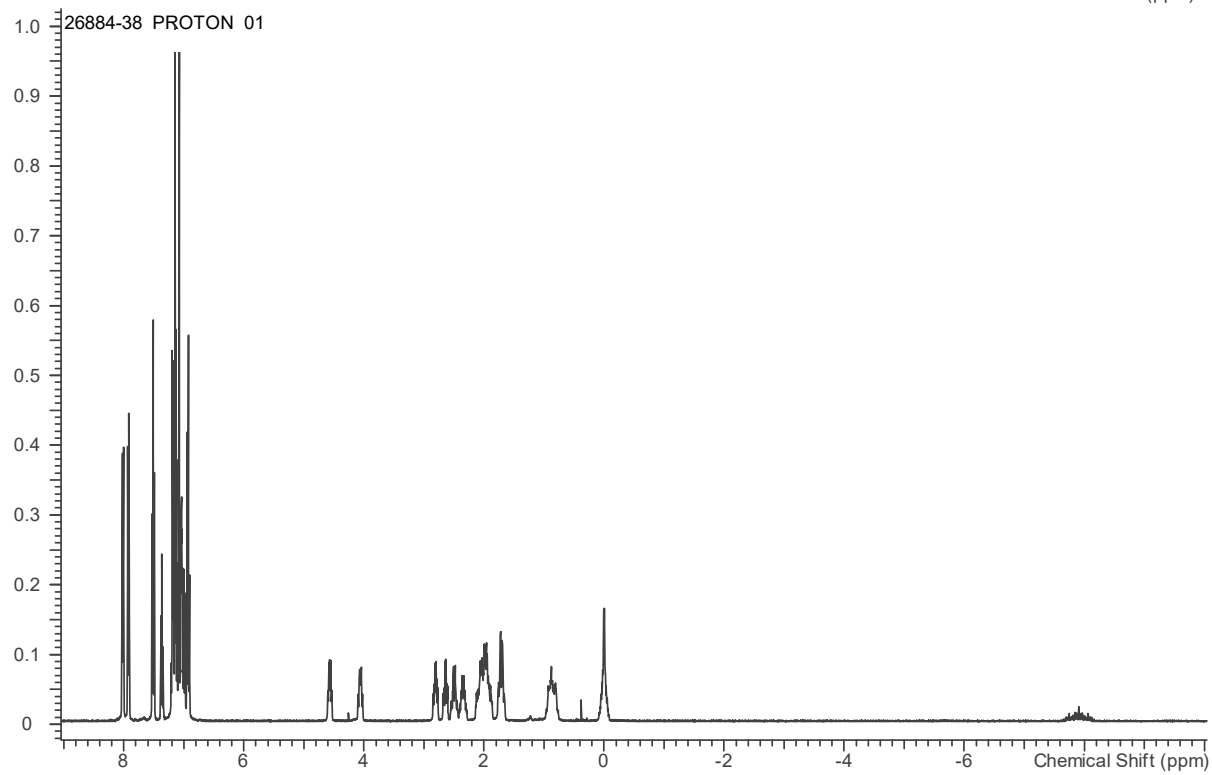

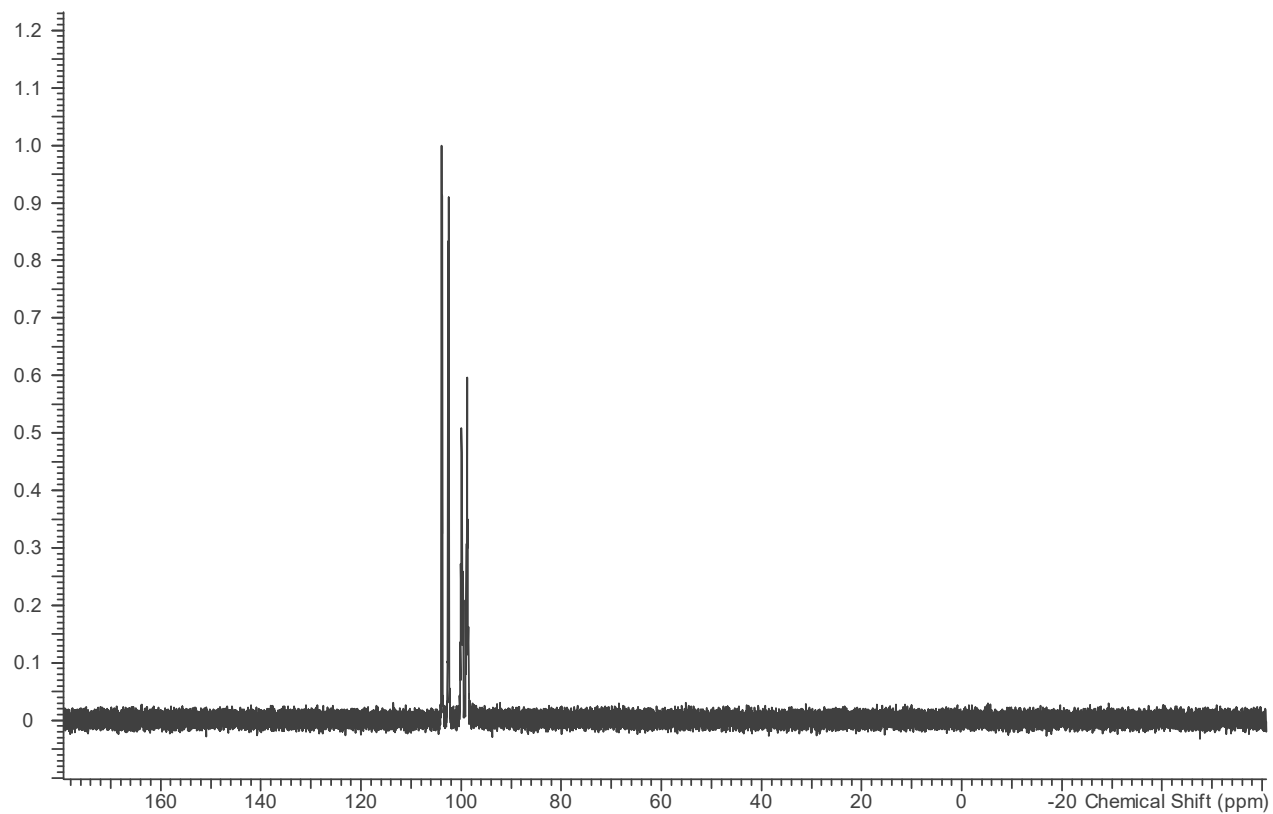 **$[(\text{p}^{\text{h}}\text{BPE})\text{Rh}(\mu\text{-H})]_2$  (6)**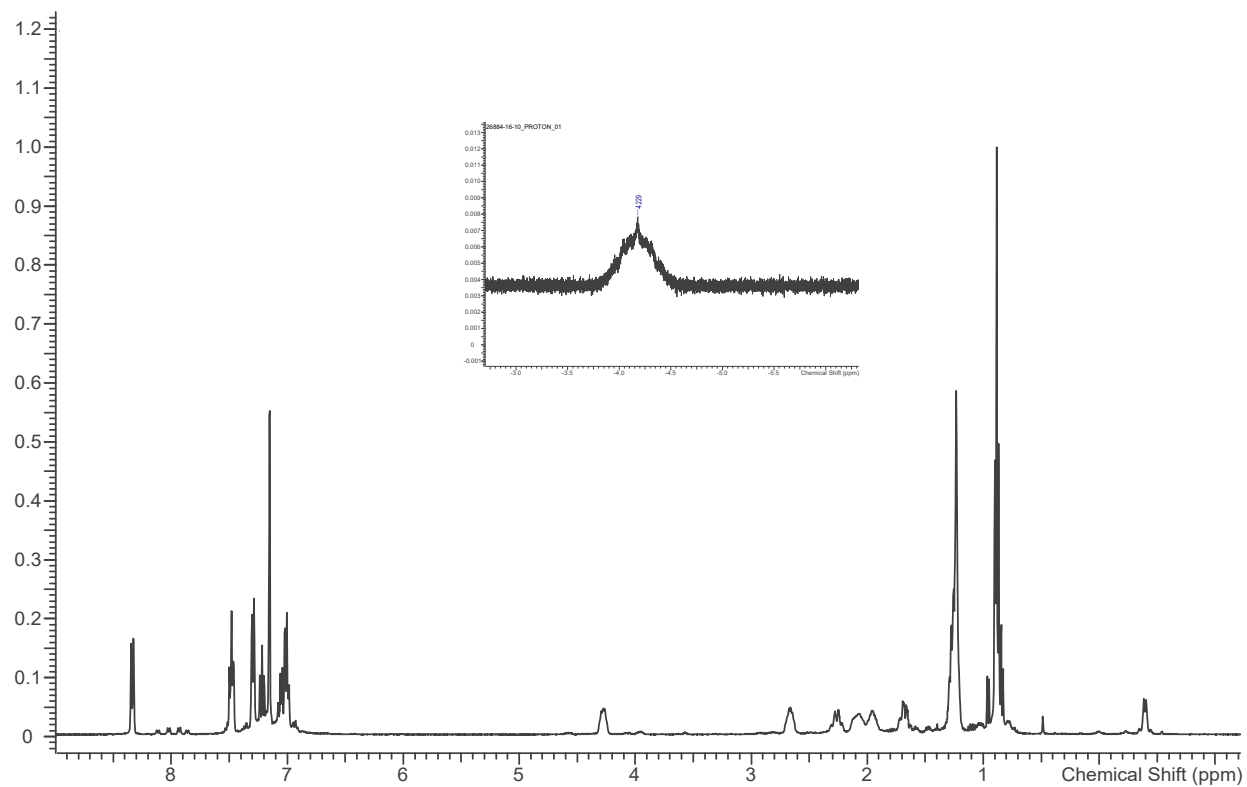

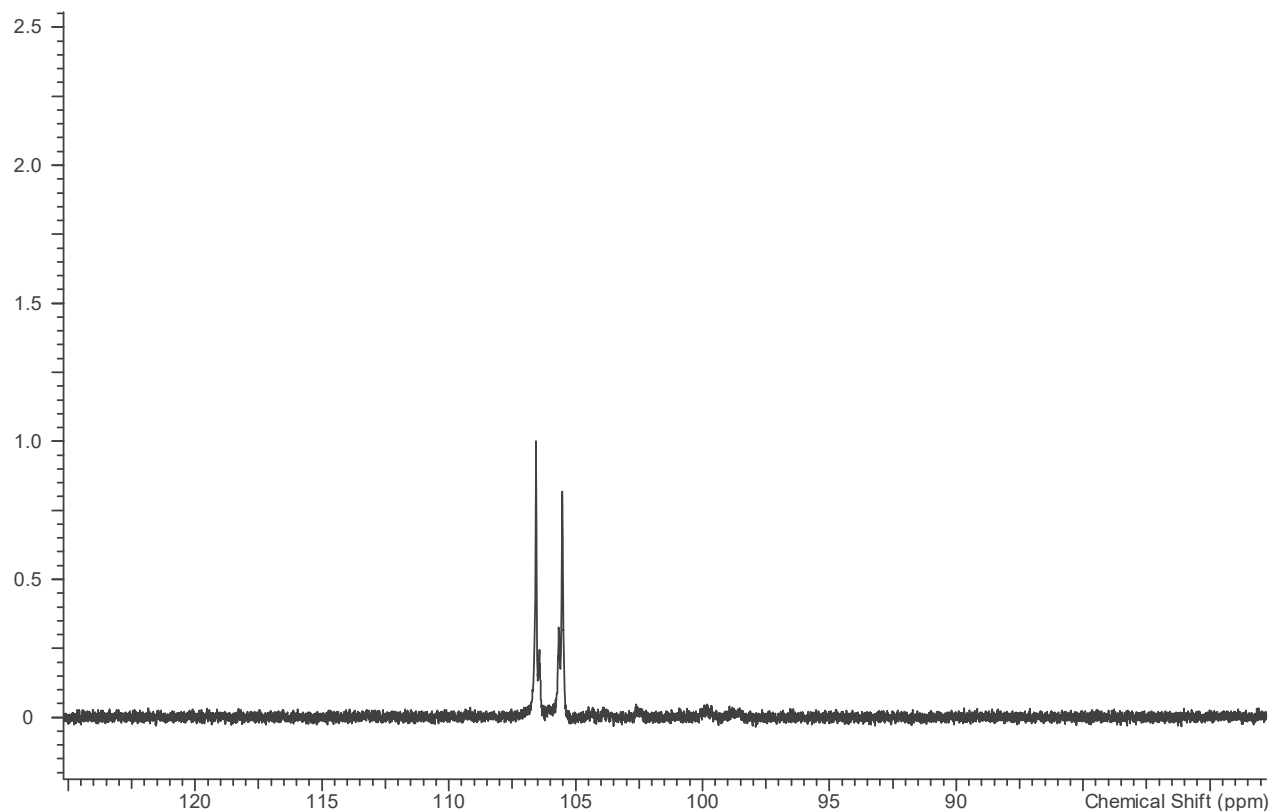

## 6. Crystallographic Data

### 6.1 [RhCl(Ph-BPE)]<sub>2</sub> (2)

**Table S8.** Crystal data and structure refinement for **2**.

|                      |                                                      |                    |
|----------------------|------------------------------------------------------|--------------------|
| Identification code  | <b>2</b>                                             |                    |
| Empirical formula    | C <sub>34</sub> H <sub>36</sub> Cl P <sub>2</sub> Rh |                    |
| Formula weight       | 644.93                                               |                    |
| Temperature          | 100(2) K                                             |                    |
| Wavelength           | 0.71073 Å                                            |                    |
| Crystal system       | Triclinic                                            |                    |
| Space group          | P1                                                   |                    |
| Unit cell dimensions | a = 10.3091(3) Å                                     | ∠ = 107.8640(10)°. |
|                      | b = 12.7665(4) Å                                     | ∠ = 101.0930(10)°. |
|                      | c = 13.3424(4) Å                                     | ∠ = 112.0990(10)°. |
| Volume               | 1451.17(8) Å <sup>3</sup>                            |                    |
| Z                    | 2                                                    |                    |

|                                   |                                             |
|-----------------------------------|---------------------------------------------|
| Density (calculated)              | 1.476 Mg/m <sup>3</sup>                     |
| Absorption coefficient            | 0.813 mm <sup>-1</sup>                      |
| F(000)                            | 664                                         |
| Crystal size                      | 0.333 x 0.186 x 0.072 mm <sup>3</sup>       |
| Theta range for data collection   | 1.711 to 28.431°.                           |
| Index ranges                      | -13<=h<=13, -16<=k<=17, -17<=l<=17          |
| Reflections collected             | 26262                                       |
| Independent reflections           | 12341 [R(int) = 0.0180]                     |
| Completeness to theta = 25.000°   | 100.0 %                                     |
| Absorption correction             | None                                        |
| Max. and min. transmission        | 1.0 and 0.915                               |
| Refinement method                 | Full-matrix least-squares on F <sup>2</sup> |
| Data / restraints / parameters    | 12341 / 3 / 685                             |
| Goodness-of-fit on F <sup>2</sup> | 1.030                                       |
| Final R indices [I>2sigma(I)]     | R1 = 0.0203, wR2 = 0.0459                   |
| R indices (all data)              | R1 = 0.0227, wR2 = 0.0469                   |
| Absolute structure parameter      | -0.006(7)                                   |
| Extinction coefficient            | n/a                                         |
| Largest diff. peak and hole       | 0.597 and -0.438 e.Å <sup>-3</sup>          |

1

**Table S9.** Atomic coordinates ( $\times 10^4$ ) and equivalent isotropic displacement parameters ( $\text{\AA}^2 \times 10^3$ ) for **2**.  $U(\text{eq})$  is defined as one third of the trace of the orthogonalized  $U_{ij}$  tensor.

|        | x       | y       | z        | U(eq) |
|--------|---------|---------|----------|-------|
| Rh(01) | 4407(1) | 4900(1) | 10268(1) | 10(1) |
| Rh(02) | 4994(1) | 5211(1) | 7792(1)  | 10(1) |
| Cl(1)  | 3412(1) | 5498(1) | 8859(1)  | 14(1) |
| P(3)   | 5151(1) | 4322(1) | 11535(1) | 11(1) |
| P(4)   | 2916(1) | 5182(1) | 11139(1) | 12(1) |
| P(1)   | 6297(1) | 4879(1) | 6760(1)  | 12(1) |
| P(2)   | 4188(1) | 5898(1) | 6655(1)  | 12(1) |
| Cl(2)  | 6061(1) | 4675(1) | 9229(1)  | 15(1) |

|       |          |         |          |       |
|-------|----------|---------|----------|-------|
| C(42) | 3439(5)  | 817(3)  | 13137(3) | 25(1) |
| C(18) | 4782(4)  | 5608(3) | 5428(3)  | 17(1) |
| C(38) | 7101(4)  | 4725(3) | 12269(3) | 15(1) |
| C(35) | 4628(4)  | 2628(3) | 10963(3) | 15(1) |
| C(29) | 1229(4)  | 4109(3) | 5196(3)  | 17(1) |
| C(34) | 1047(4)  | 3171(3) | 5569(3)  | 21(1) |
| C(26) | 6052(5)  | 9120(3) | 10845(3) | 32(1) |
| C(17) | 6296(4)  | 5643(3) | 5788(3)  | 18(1) |
| C(4)  | 8277(3)  | 5282(3) | 7400(3)  | 15(1) |
| C(16) | 9544(3)  | 7288(3) | 9125(3)  | 18(1) |
| C(9)  | 5779(4)  | 1423(3) | 7605(3)  | 25(1) |
| C(57) | 203(3)   | 3106(3) | 9511(3)  | 18(1) |
| C(47) | 9473(3)  | 8063(3) | 12730(3) | 22(1) |
| C(27) | 4745(5)  | 8999(3) | 10213(3) | 27(1) |
| C(10) | 6272(3)  | 2149(3) | 7033(3)  | 21(1) |
| C(2)  | 7242(3)  | 3391(3) | 5537(3)  | 22(1) |
| C(50) | 8966(4)  | 6679(3) | 13971(3) | 21(1) |
| C(22) | 2183(4)  | 5455(3) | 6013(3)  | 15(1) |
| C(53) | 834(3)   | 4390(3) | 10424(3) | 17(1) |
| C(8)  | 4305(5)  | 959(3)  | 7555(3)  | 26(1) |
| C(67) | 4641(4)  | 9106(3) | 14625(3) | 24(1) |
| C(45) | 8210(4)  | 6092(3) | 12822(3) | 16(1) |
| C(30) | 476(4)   | 3760(4) | 4060(3)  | 24(1) |
| C(52) | 3075(3)  | 4804(3) | 12374(3) | 14(1) |
| C(11) | 9286(3)  | 6664(3) | 7993(3)  | 16(1) |
| C(31) | -420(4)  | 2510(4) | 3335(3)  | 30(1) |
| C(39) | 4272(3)  | 2022(2) | 11756(2) | 16(1) |
| C(48) | 10241(3) | 8633(3) | 13888(3) | 24(1) |
| C(32) | -578(4)  | 1599(3) | 3715(3)  | 27(1) |
| C(60) | -862(4)  | 701(3)  | 7883(3)  | 35(1) |
| C(49) | 9979(4)  | 7941(3) | 14506(3) | 26(1) |
| C(19) | 4722(4)  | 7599(3) | 7214(3)  | 19(1) |
| C(6)  | 3829(3)  | 1941(3) | 6358(3)  | 20(1) |
| C(41) | 4810(4)  | 1097(3) | 13010(3) | 22(1) |
| C(13) | 10794(3) | 8641(3) | 7987(3)  | 24(1) |

|       |          |         |          |       |
|-------|----------|---------|----------|-------|
| C(59) | -921(4)  | 886(3)  | 8943(4)  | 40(1) |
| C(65) | 6607(4)  | 8782(3) | 14114(3) | 27(1) |
| C(20) | 3410(4)  | 7705(3) | 6539(3)  | 28(1) |
| C(44) | 2881(3)  | 1728(3) | 11889(3) | 21(1) |
| C(58) | -401(3)  | 2077(3) | 9751(3)  | 28(1) |
| C(62) | 250(3)   | 2910(3) | 8445(3)  | 22(1) |
| C(33) | 157(4)   | 1930(3) | 4834(3)  | 25(1) |
| C(24) | 6509(3)  | 8301(3) | 9142(3)  | 23(1) |
| C(46) | 8470(4)  | 6804(3) | 12207(3) | 19(1) |
| C(64) | 5614(3)  | 7954(3) | 13047(3) | 22(1) |
| C(21) | 2263(3)  | 6450(3) | 5594(3)  | 20(1) |
| C(1)  | 5823(3)  | 3265(3) | 5821(2)  | 16(1) |
| C(12) | 9929(3)  | 7359(3) | 7432(3)  | 19(1) |
| C(36) | 5980(3)  | 2649(3) | 10608(3) | 20(1) |
| C(7)  | 3324(4)  | 1216(3) | 6923(3)  | 26(1) |
| C(3)  | 8667(3)  | 4516(3) | 6483(3)  | 21(1) |
| C(28) | 4298(3)  | 8518(3) | 9041(3)  | 22(1) |
| C(61) | -288(4)  | 1707(3) | 7631(3)  | 30(1) |
| C(51) | 4549(4)  | 4779(3) | 12739(3) | 15(1) |
| C(14) | 11065(4) | 9244(3) | 9120(3)  | 26(1) |
| C(68) | 3631(3)  | 8251(3) | 13552(2) | 19(1) |
| C(23) | 5177(3)  | 8169(2) | 8486(2)  | 18(1) |
| C(55) | 1441(3)  | 6570(3) | 11228(3) | 21(1) |
| C(66) | 6117(5)  | 9366(4) | 14910(3) | 27(1) |
| C(37) | 7448(3)  | 3852(3) | 11407(3) | 19(1) |
| C(5)  | 5306(3)  | 2418(2) | 6403(2)  | 18(1) |
| C(25) | 6941(4)  | 8768(3) | 10299(3) | 32(1) |
| C(15) | 10438(3) | 8564(3) | 9684(3)  | 25(1) |
| C(40) | 5232(3)  | 1711(3) | 12334(2) | 18(1) |
| C(43) | 2479(4)  | 1145(3) | 12588(3) | 25(1) |
| C(63) | 4102(3)  | 7667(3) | 12741(2) | 16(1) |
| C(56) | 3061(3)  | 6774(3) | 11561(2) | 16(1) |
| C(54) | 520(3)   | 5375(3) | 10154(2) | 18(1) |

---





**Table S10.** Bond lengths [Å] and angles [°] for **2**.

---

|              |            |
|--------------|------------|
| Rh(01)-P(3)  | 2.1640(9)  |
| Rh(01)-P(4)  | 2.1655(9)  |
| Rh(01)-Cl(1) | 2.4291(9)  |
| Rh(01)-Cl(2) | 2.4380(9)  |
| Rh(02)-P(2)  | 2.1533(10) |
| Rh(02)-P(1)  | 2.1595(9)  |
| Rh(02)-Cl(1) | 2.4168(9)  |
| Rh(02)-Cl(2) | 2.4334(9)  |
| P(3)-C(51)   | 1.840(3)   |
| P(3)-C(38)   | 1.850(3)   |
| P(3)-C(35)   | 1.872(4)   |
| P(4)-C(52)   | 1.849(3)   |
| P(4)-C(56)   | 1.872(3)   |
| P(4)-C(53)   | 1.878(3)   |
| P(1)-C(17)   | 1.847(3)   |
| P(1)-C(4)    | 1.852(3)   |
| P(1)-C(1)    | 1.865(3)   |
| P(2)-C(18)   | 1.838(3)   |
| P(2)-C(22)   | 1.862(3)   |
| P(2)-C(19)   | 1.877(4)   |
| C(42)-C(41)  | 1.379(5)   |
| C(42)-C(43)  | 1.383(5)   |
| C(42)-H(42)  | 0.9500     |
| C(18)-C(17)  | 1.522(4)   |
| C(18)-H(18A) | 0.9900     |
| C(18)-H(18B) | 0.9900     |
| C(38)-C(45)  | 1.510(5)   |
| C(38)-C(37)  | 1.537(4)   |
| C(38)-H(38)  | 1.0000     |
| C(35)-C(39)  | 1.513(4)   |
| C(35)-C(36)  | 1.550(4)   |
| C(35)-H(35)  | 1.0000     |
| C(29)-C(34)  | 1.396(5)   |

|              |          |
|--------------|----------|
| C(29)-C(30)  | 1.403(5) |
| C(29)-C(22)  | 1.509(5) |
| C(34)-C(33)  | 1.386(5) |
| C(34)-H(34)  | 0.9500   |
| C(26)-C(27)  | 1.370(5) |
| C(26)-C(25)  | 1.393(5) |
| C(26)-H(26)  | 0.9500   |
| C(17)-H(17A) | 0.9900   |
| C(17)-H(17B) | 0.9900   |
| C(4)-C(11)   | 1.505(4) |
| C(4)-C(3)    | 1.538(4) |
| C(4)-H(4)    | 1.0000   |
| C(16)-C(15)  | 1.386(4) |
| C(16)-C(11)  | 1.391(4) |
| C(16)-H(16)  | 0.9500   |
| C(9)-C(8)    | 1.387(5) |
| C(9)-C(10)   | 1.388(4) |
| C(9)-H(9)    | 0.9500   |
| C(57)-C(62)  | 1.380(5) |
| C(57)-C(58)  | 1.391(4) |
| C(57)-C(53)  | 1.504(4) |
| C(47)-C(46)  | 1.387(4) |
| C(47)-C(48)  | 1.396(5) |
| C(47)-H(47)  | 0.9500   |
| C(27)-C(28)  | 1.399(5) |
| C(27)-H(27)  | 0.9500   |
| C(10)-C(5)   | 1.388(4) |
| C(10)-H(10)  | 0.9500   |
| C(2)-C(1)    | 1.544(4) |
| C(2)-C(3)    | 1.550(4) |
| C(2)-H(2A)   | 0.9900   |
| C(2)-H(2B)   | 0.9900   |
| C(50)-C(45)  | 1.384(5) |
| C(50)-C(49)  | 1.392(5) |
| C(50)-H(50)  | 0.9500   |

|              |          |
|--------------|----------|
| C(22)-C(21)  | 1.519(4) |
| C(22)-H(22)  | 1.0000   |
| C(53)-C(54)  | 1.534(4) |
| C(53)-H(53)  | 1.0000   |
| C(8)-C(7)    | 1.390(5) |
| C(8)-H(8)    | 0.9500   |
| C(67)-C(66)  | 1.375(5) |
| C(67)-C(68)  | 1.392(4) |
| C(67)-H(67)  | 0.9500   |
| C(45)-C(46)  | 1.389(5) |
| C(30)-C(31)  | 1.391(5) |
| C(30)-H(30)  | 0.9500   |
| C(52)-C(51)  | 1.520(4) |
| C(52)-H(52A) | 0.9900   |
| C(52)-H(52B) | 0.9900   |
| C(11)-C(12)  | 1.394(4) |
| C(31)-C(32)  | 1.374(5) |
| C(31)-H(31)  | 0.9500   |
| C(39)-C(40)  | 1.387(4) |
| C(39)-C(44)  | 1.400(4) |
| C(48)-C(49)  | 1.374(5) |
| C(48)-H(48)  | 0.9500   |
| C(32)-C(33)  | 1.385(5) |
| C(32)-H(32)  | 0.9500   |
| C(60)-C(61)  | 1.373(5) |
| C(60)-C(59)  | 1.378(6) |
| C(60)-H(60)  | 0.9500   |
| C(49)-H(49)  | 0.9500   |
| C(19)-C(23)  | 1.520(4) |
| C(19)-C(20)  | 1.551(5) |
| C(19)-H(19)  | 1.0000   |
| C(6)-C(7)    | 1.383(5) |
| C(6)-C(5)    | 1.392(4) |
| C(6)-H(6)    | 0.9500   |
| C(41)-C(40)  | 1.395(4) |

|              |          |
|--------------|----------|
| C(41)-H(41)  | 0.9500   |
| C(13)-C(14)  | 1.385(5) |
| C(13)-C(12)  | 1.388(4) |
| C(13)-H(13)  | 0.9500   |
| C(59)-C(58)  | 1.386(5) |
| C(59)-H(59)  | 0.9500   |
| C(65)-C(64)  | 1.376(4) |
| C(65)-C(66)  | 1.394(5) |
| C(65)-H(65)  | 0.9500   |
| C(20)-C(21)  | 1.522(4) |
| C(20)-H(20A) | 0.9900   |
| C(20)-H(20B) | 0.9900   |
| C(44)-C(43)  | 1.392(4) |
| C(44)-H(44)  | 0.9500   |
| C(58)-H(58)  | 0.9500   |
| C(62)-C(61)  | 1.396(4) |
| C(62)-H(62)  | 0.9500   |
| C(33)-H(33)  | 0.9500   |
| C(24)-C(25)  | 1.381(5) |
| C(24)-C(23)  | 1.397(4) |
| C(24)-H(24)  | 0.9500   |
| C(46)-H(46)  | 0.9500   |
| C(64)-C(63)  | 1.402(4) |
| C(64)-H(64)  | 0.9500   |
| C(21)-H(21A) | 0.9900   |
| C(21)-H(21B) | 0.9900   |
| C(1)-C(5)    | 1.516(4) |
| C(1)-H(1)    | 1.0000   |
| C(12)-H(12)  | 0.9500   |
| C(36)-C(37)  | 1.553(4) |
| C(36)-H(36A) | 0.9900   |
| C(36)-H(36B) | 0.9900   |
| C(7)-H(7)    | 0.9500   |
| C(3)-H(3A)   | 0.9900   |
| C(3)-H(3B)   | 0.9900   |

|                    |           |
|--------------------|-----------|
| C(28)-C(23)        | 1.388(4)  |
| C(28)-H(28)        | 0.9500    |
| C(61)-H(61)        | 0.9500    |
| C(51)-H(51A)       | 0.9900    |
| C(51)-H(51B)       | 0.9900    |
| C(14)-C(15)        | 1.379(5)  |
| C(14)-H(14)        | 0.9500    |
| C(68)-C(63)        | 1.393(4)  |
| C(68)-H(68)        | 0.9500    |
| C(55)-C(54)        | 1.526(4)  |
| C(55)-C(56)        | 1.540(4)  |
| C(55)-H(55A)       | 0.9900    |
| C(55)-H(55B)       | 0.9900    |
| C(66)-H(66)        | 0.9500    |
| C(37)-H(37A)       | 0.9900    |
| C(37)-H(37B)       | 0.9900    |
| C(25)-H(25)        | 0.9500    |
| C(15)-H(15)        | 0.9500    |
| C(40)-H(40)        | 0.9500    |
| C(43)-H(43)        | 0.9500    |
| C(63)-C(56)        | 1.503(4)  |
| C(56)-H(56)        | 1.0000    |
| C(54)-H(54A)       | 0.9900    |
| C(54)-H(54B)       | 0.9900    |
| P(3)-Rh(01)-P(4)   | 85.16(4)  |
| P(3)-Rh(01)-Cl(1)  | 176.24(3) |
| P(4)-Rh(01)-Cl(1)  | 91.58(3)  |
| P(3)-Rh(01)-Cl(2)  | 98.51(3)  |
| P(4)-Rh(01)-Cl(2)  | 176.11(3) |
| Cl(1)-Rh(01)-Cl(2) | 84.79(3)  |
| P(2)-Rh(02)-P(1)   | 85.45(4)  |
| P(2)-Rh(02)-Cl(1)  | 93.21(3)  |
| P(1)-Rh(02)-Cl(1)  | 176.85(4) |
| P(2)-Rh(02)-Cl(2)  | 173.64(3) |
| P(1)-Rh(02)-Cl(2)  | 96.49(3)  |

|                     |            |
|---------------------|------------|
| Cl(1)-Rh(02)-Cl(2)  | 85.15(3)   |
| Rh(02)-Cl(1)-Rh(01) | 95.33(3)   |
| C(51)-P(3)-C(38)    | 100.65(16) |
| C(51)-P(3)-C(35)    | 111.47(16) |
| C(38)-P(3)-C(35)    | 90.59(15)  |
| C(51)-P(3)-Rh(01)   | 112.07(12) |
| C(38)-P(3)-Rh(01)   | 126.56(12) |
| C(35)-P(3)-Rh(01)   | 113.33(12) |
| C(52)-P(4)-C(56)    | 109.19(14) |
| C(52)-P(4)-C(53)    | 101.34(15) |
| C(56)-P(4)-C(53)    | 93.01(14)  |
| C(52)-P(4)-Rh(01)   | 114.01(11) |
| C(56)-P(4)-Rh(01)   | 114.11(9)  |
| C(53)-P(4)-Rh(01)   | 122.66(11) |
| C(17)-P(1)-C(4)     | 105.23(16) |
| C(17)-P(1)-C(1)     | 102.98(15) |
| C(4)-P(1)-C(1)      | 92.33(13)  |
| C(17)-P(1)-Rh(02)   | 111.41(11) |
| C(4)-P(1)-Rh(02)    | 121.05(11) |
| C(1)-P(1)-Rh(02)    | 120.88(10) |
| C(18)-P(2)-C(22)    | 102.54(16) |
| C(18)-P(2)-C(19)    | 104.25(16) |
| C(22)-P(2)-C(19)    | 91.84(17)  |
| C(18)-P(2)-Rh(02)   | 112.55(12) |
| C(22)-P(2)-Rh(02)   | 124.19(12) |
| C(19)-P(2)-Rh(02)   | 118.06(12) |
| Rh(02)-Cl(2)-Rh(01) | 94.68(3)   |
| C(41)-C(42)-C(43)   | 119.7(3)   |
| C(41)-C(42)-H(42)   | 120.2      |
| C(43)-C(42)-H(42)   | 120.2      |
| C(17)-C(18)-P(2)    | 108.2(2)   |
| C(17)-C(18)-H(18A)  | 110.1      |
| P(2)-C(18)-H(18A)   | 110.1      |
| C(17)-C(18)-H(18B)  | 110.1      |
| P(2)-C(18)-H(18B)   | 110.1      |

|                     |          |
|---------------------|----------|
| H(18A)-C(18)-H(18B) | 108.4    |
| C(45)-C(38)-C(37)   | 117.4(3) |
| C(45)-C(38)-P(3)    | 116.2(2) |
| C(37)-C(38)-P(3)    | 104.0(2) |
| C(45)-C(38)-H(38)   | 106.1    |
| C(37)-C(38)-H(38)   | 106.1    |
| P(3)-C(38)-H(38)    | 106.1    |
| C(39)-C(35)-C(36)   | 117.0(3) |
| C(39)-C(35)-P(3)    | 114.7(2) |
| C(36)-C(35)-P(3)    | 100.7(2) |
| C(39)-C(35)-H(35)   | 108.0    |
| C(36)-C(35)-H(35)   | 108.0    |
| P(3)-C(35)-H(35)    | 108.0    |
| C(34)-C(29)-C(30)   | 118.2(3) |
| C(34)-C(29)-C(22)   | 119.9(3) |
| C(30)-C(29)-C(22)   | 121.8(3) |
| C(33)-C(34)-C(29)   | 120.8(3) |
| C(33)-C(34)-H(34)   | 119.6    |
| C(29)-C(34)-H(34)   | 119.6    |
| C(27)-C(26)-C(25)   | 118.7(3) |
| C(27)-C(26)-H(26)   | 120.6    |
| C(25)-C(26)-H(26)   | 120.6    |
| C(18)-C(17)-P(1)    | 108.5(2) |
| C(18)-C(17)-H(17A)  | 110.0    |
| P(1)-C(17)-H(17A)   | 110.0    |
| C(18)-C(17)-H(17B)  | 110.0    |
| P(1)-C(17)-H(17B)   | 110.0    |
| H(17A)-C(17)-H(17B) | 108.4    |
| C(11)-C(4)-C(3)     | 117.7(3) |
| C(11)-C(4)-P(1)     | 112.8(2) |
| C(3)-C(4)-P(1)      | 106.5(2) |
| C(11)-C(4)-H(4)     | 106.4    |
| C(3)-C(4)-H(4)      | 106.4    |
| P(1)-C(4)-H(4)      | 106.4    |
| C(15)-C(16)-C(11)   | 120.8(3) |

|                   |          |
|-------------------|----------|
| C(15)-C(16)-H(16) | 119.6    |
| C(11)-C(16)-H(16) | 119.6    |
| C(8)-C(9)-C(10)   | 120.1(3) |
| C(8)-C(9)-H(9)    | 120.0    |
| C(10)-C(9)-H(9)   | 120.0    |
| C(62)-C(57)-C(58) | 118.4(3) |
| C(62)-C(57)-C(53) | 122.1(3) |
| C(58)-C(57)-C(53) | 119.4(3) |
| C(46)-C(47)-C(48) | 120.2(3) |
| C(46)-C(47)-H(47) | 119.9    |
| C(48)-C(47)-H(47) | 119.9    |
| C(26)-C(27)-C(28) | 120.9(4) |
| C(26)-C(27)-H(27) | 119.5    |
| C(28)-C(27)-H(27) | 119.5    |
| C(5)-C(10)-C(9)   | 120.9(3) |
| C(5)-C(10)-H(10)  | 119.6    |
| C(9)-C(10)-H(10)  | 119.6    |
| C(1)-C(2)-C(3)    | 111.5(2) |
| C(1)-C(2)-H(2A)   | 109.3    |
| C(3)-C(2)-H(2A)   | 109.3    |
| C(1)-C(2)-H(2B)   | 109.3    |
| C(3)-C(2)-H(2B)   | 109.3    |
| H(2A)-C(2)-H(2B)  | 108.0    |
| C(45)-C(50)-C(49) | 121.7(3) |
| C(45)-C(50)-H(50) | 119.2    |
| C(49)-C(50)-H(50) | 119.2    |
| C(29)-C(22)-C(21) | 118.4(3) |
| C(29)-C(22)-P(2)  | 114.3(2) |
| C(21)-C(22)-P(2)  | 102.7(2) |
| C(29)-C(22)-H(22) | 106.9    |
| C(21)-C(22)-H(22) | 106.9    |
| P(2)-C(22)-H(22)  | 106.9    |
| C(57)-C(53)-C(54) | 119.5(3) |
| C(57)-C(53)-P(4)  | 114.3(2) |
| C(54)-C(53)-P(4)  | 104.2(2) |



|                     |          |
|---------------------|----------|
| C(57)-C(53)-H(53)   | 105.9    |
| C(54)-C(53)-H(53)   | 105.9    |
| P(4)-C(53)-H(53)    | 105.9    |
| C(9)-C(8)-C(7)      | 119.7(3) |
| C(9)-C(8)-H(8)      | 120.2    |
| C(7)-C(8)-H(8)      | 120.2    |
| C(66)-C(67)-C(68)   | 120.3(3) |
| C(66)-C(67)-H(67)   | 119.8    |
| C(68)-C(67)-H(67)   | 119.8    |
| C(50)-C(45)-C(46)   | 118.1(3) |
| C(50)-C(45)-C(38)   | 120.4(3) |
| C(46)-C(45)-C(38)   | 121.5(3) |
| C(31)-C(30)-C(29)   | 120.3(4) |
| C(31)-C(30)-H(30)   | 119.8    |
| C(29)-C(30)-H(30)   | 119.8    |
| C(51)-C(52)-P(4)    | 109.5(2) |
| C(51)-C(52)-H(52A)  | 109.8    |
| P(4)-C(52)-H(52A)   | 109.8    |
| C(51)-C(52)-H(52B)  | 109.8    |
| P(4)-C(52)-H(52B)   | 109.8    |
| H(52A)-C(52)-H(52B) | 108.2    |
| C(16)-C(11)-C(12)   | 118.2(3) |
| C(16)-C(11)-C(4)    | 119.6(3) |
| C(12)-C(11)-C(4)    | 122.1(3) |
| C(32)-C(31)-C(30)   | 120.7(3) |
| C(32)-C(31)-H(31)   | 119.6    |
| C(30)-C(31)-H(31)   | 119.6    |
| C(40)-C(39)-C(44)   | 118.2(3) |
| C(40)-C(39)-C(35)   | 123.5(3) |
| C(44)-C(39)-C(35)   | 118.3(3) |
| C(49)-C(48)-C(47)   | 119.5(3) |
| C(49)-C(48)-H(48)   | 120.3    |
| C(47)-C(48)-H(48)   | 120.3    |
| C(31)-C(32)-C(33)   | 119.6(3) |
| C(31)-C(32)-H(32)   | 120.2    |

|                     |          |
|---------------------|----------|
| C(33)-C(32)-H(32)   | 120.2    |
| C(61)-C(60)-C(59)   | 119.4(3) |
| C(61)-C(60)-H(60)   | 120.3    |
| C(59)-C(60)-H(60)   | 120.3    |
| C(48)-C(49)-C(50)   | 119.8(3) |
| C(48)-C(49)-H(49)   | 120.1    |
| C(50)-C(49)-H(49)   | 120.1    |
| C(23)-C(19)-C(20)   | 116.8(3) |
| C(23)-C(19)-P(2)    | 111.1(2) |
| C(20)-C(19)-P(2)    | 106.2(2) |
| C(23)-C(19)-H(19)   | 107.4    |
| C(20)-C(19)-H(19)   | 107.4    |
| P(2)-C(19)-H(19)    | 107.4    |
| C(7)-C(6)-C(5)      | 121.2(3) |
| C(7)-C(6)-H(6)      | 119.4    |
| C(5)-C(6)-H(6)      | 119.4    |
| C(42)-C(41)-C(40)   | 120.3(3) |
| C(42)-C(41)-H(41)   | 119.8    |
| C(40)-C(41)-H(41)   | 119.8    |
| C(14)-C(13)-C(12)   | 120.1(3) |
| C(14)-C(13)-H(13)   | 119.9    |
| C(12)-C(13)-H(13)   | 119.9    |
| C(60)-C(59)-C(58)   | 120.4(3) |
| C(60)-C(59)-H(59)   | 119.8    |
| C(58)-C(59)-H(59)   | 119.8    |
| C(64)-C(65)-C(66)   | 119.9(3) |
| C(64)-C(65)-H(65)   | 120.0    |
| C(66)-C(65)-H(65)   | 120.0    |
| C(21)-C(20)-C(19)   | 110.8(3) |
| C(21)-C(20)-H(20A)  | 109.5    |
| C(19)-C(20)-H(20A)  | 109.5    |
| C(21)-C(20)-H(20B)  | 109.5    |
| C(19)-C(20)-H(20B)  | 109.5    |
| H(20A)-C(20)-H(20B) | 108.1    |
| C(43)-C(44)-C(39)   | 120.8(3) |

|                     |            |
|---------------------|------------|
| C(43)-C(44)-H(44)   | 119.6      |
| C(39)-C(44)-H(44)   | 119.6      |
| C(59)-C(58)-C(57)   | 120.7(3)   |
| C(59)-C(58)-H(58)   | 119.7      |
| C(57)-C(58)-H(58)   | 119.7      |
| C(57)-C(62)-C(61)   | 120.6(3)   |
| C(57)-C(62)-H(62)   | 119.7      |
| C(61)-C(62)-H(62)   | 119.7      |
| C(32)-C(33)-C(34)   | 120.4(3)   |
| C(32)-C(33)-H(33)   | 119.8      |
| C(34)-C(33)-H(33)   | 119.8      |
| C(25)-C(24)-C(23)   | 121.3(3)   |
| C(25)-C(24)-H(24)   | 119.3      |
| C(23)-C(24)-H(24)   | 119.3      |
| C(47)-C(46)-C(45)   | 120.8(3)   |
| C(47)-C(46)-H(46)   | 119.6      |
| C(45)-C(46)-H(46)   | 119.6      |
| C(65)-C(64)-C(63)   | 121.3(3)   |
| C(65)-C(64)-H(64)   | 119.3      |
| C(63)-C(64)-H(64)   | 119.3      |
| C(22)-C(21)-C(20)   | 107.7(3)   |
| C(22)-C(21)-H(21A)  | 110.2      |
| C(20)-C(21)-H(21A)  | 110.2      |
| C(22)-C(21)-H(21B)  | 110.2      |
| C(20)-C(21)-H(21B)  | 110.2      |
| H(21A)-C(21)-H(21B) | 108.5      |
| C(5)-C(1)-C(2)      | 116.4(2)   |
| C(5)-C(1)-P(1)      | 109.07(19) |
| C(2)-C(1)-P(1)      | 104.72(19) |
| C(5)-C(1)-H(1)      | 108.8      |
| C(2)-C(1)-H(1)      | 108.8      |
| P(1)-C(1)-H(1)      | 108.8      |
| C(13)-C(12)-C(11)   | 120.9(3)   |
| C(13)-C(12)-H(12)   | 119.6      |
| C(11)-C(12)-H(12)   | 119.6      |

|                     |          |
|---------------------|----------|
| C(35)-C(36)-C(37)   | 111.7(2) |
| C(35)-C(36)-H(36A)  | 109.3    |
| C(37)-C(36)-H(36A)  | 109.3    |
| C(35)-C(36)-H(36B)  | 109.3    |
| C(37)-C(36)-H(36B)  | 109.3    |
| H(36A)-C(36)-H(36B) | 107.9    |
| C(6)-C(7)-C(8)      | 119.8(3) |
| C(6)-C(7)-H(7)      | 120.1    |
| C(8)-C(7)-H(7)      | 120.1    |
| C(4)-C(3)-C(2)      | 111.4(2) |
| C(4)-C(3)-H(3A)     | 109.3    |
| C(2)-C(3)-H(3A)     | 109.3    |
| C(4)-C(3)-H(3B)     | 109.3    |
| C(2)-C(3)-H(3B)     | 109.3    |
| H(3A)-C(3)-H(3B)    | 108.0    |
| C(23)-C(28)-C(27)   | 120.9(3) |
| C(23)-C(28)-H(28)   | 119.5    |
| C(27)-C(28)-H(28)   | 119.5    |
| C(60)-C(61)-C(62)   | 120.4(3) |
| C(60)-C(61)-H(61)   | 119.8    |
| C(62)-C(61)-H(61)   | 119.8    |
| C(52)-C(51)-P(3)    | 111.0(2) |
| C(52)-C(51)-H(51A)  | 109.4    |
| P(3)-C(51)-H(51A)   | 109.4    |
| C(52)-C(51)-H(51B)  | 109.4    |
| P(3)-C(51)-H(51B)   | 109.4    |
| H(51A)-C(51)-H(51B) | 108.0    |
| C(15)-C(14)-C(13)   | 119.5(3) |
| C(15)-C(14)-H(14)   | 120.3    |
| C(13)-C(14)-H(14)   | 120.3    |
| C(67)-C(68)-C(63)   | 120.8(3) |
| C(67)-C(68)-H(68)   | 119.6    |
| C(63)-C(68)-H(68)   | 119.6    |
| C(28)-C(23)-C(24)   | 117.5(3) |
| C(28)-C(23)-C(19)   | 123.3(3) |

|                     |          |
|---------------------|----------|
| C(24)-C(23)-C(19)   | 119.1(3) |
| C(54)-C(55)-C(56)   | 107.4(2) |
| C(54)-C(55)-H(55A)  | 110.2    |
| C(56)-C(55)-H(55A)  | 110.2    |
| C(54)-C(55)-H(55B)  | 110.2    |
| C(56)-C(55)-H(55B)  | 110.2    |
| H(55A)-C(55)-H(55B) | 108.5    |
| C(67)-C(66)-C(65)   | 119.7(3) |
| C(67)-C(66)-H(66)   | 120.1    |
| C(65)-C(66)-H(66)   | 120.1    |
| C(38)-C(37)-C(36)   | 109.6(2) |
| C(38)-C(37)-H(37A)  | 109.8    |
| C(36)-C(37)-H(37A)  | 109.8    |
| C(38)-C(37)-H(37B)  | 109.8    |
| C(36)-C(37)-H(37B)  | 109.8    |
| H(37A)-C(37)-H(37B) | 108.2    |
| C(10)-C(5)-C(6)     | 118.4(3) |
| C(10)-C(5)-C(1)     | 122.4(3) |
| C(6)-C(5)-C(1)      | 119.1(3) |
| C(24)-C(25)-C(26)   | 120.6(3) |
| C(24)-C(25)-H(25)   | 119.7    |
| C(26)-C(25)-H(25)   | 119.7    |
| C(14)-C(15)-C(16)   | 120.5(3) |
| C(14)-C(15)-H(15)   | 119.8    |
| C(16)-C(15)-H(15)   | 119.8    |
| C(39)-C(40)-C(41)   | 120.8(3) |
| C(39)-C(40)-H(40)   | 119.6    |
| C(41)-C(40)-H(40)   | 119.6    |
| C(42)-C(43)-C(44)   | 120.1(3) |
| C(42)-C(43)-H(43)   | 120.0    |
| C(44)-C(43)-H(43)   | 120.0    |
| C(68)-C(63)-C(64)   | 117.9(3) |
| C(68)-C(63)-C(56)   | 122.5(3) |
| C(64)-C(63)-C(56)   | 119.6(2) |
| C(63)-C(56)-C(55)   | 118.0(2) |

|                     |            |
|---------------------|------------|
| C(63)-C(56)-P(4)    | 113.9(2)   |
| C(55)-C(56)-P(4)    | 105.67(19) |
| C(63)-C(56)-H(56)   | 106.2      |
| C(55)-C(56)-H(56)   | 106.2      |
| P(4)-C(56)-H(56)    | 106.2      |
| C(55)-C(54)-C(53)   | 104.9(2)   |
| C(55)-C(54)-H(54A)  | 110.8      |
| C(53)-C(54)-H(54A)  | 110.8      |
| C(55)-C(54)-H(54B)  | 110.8      |
| C(53)-C(54)-H(54B)  | 110.8      |
| H(54A)-C(54)-H(54B) | 108.8      |

Symmetry transformations used to generate equivalent atoms:

**Table S11.** Anisotropic displacement parameters ( $\text{\AA}^2 \times 10^3$ ) for **2**. The anisotropic displacement factor exponent takes the form:  $-2\pi^2 [h^2 a^{*2} U^{11} + \dots + 2 h k a^* b^* U^{12}]$ .

|        | $U^{11}$ | $U^{22}$ | $U^{33}$ | $U^{23}$ | $U^{13}$ | $U^{12}$ |
|--------|----------|----------|----------|----------|----------|----------|
| Rh(01) | 11(1)    | 13(1)    | 9(1)     | 5(1)     | 5(1)     | 6(1)     |
| Rh(02) | 10(1)    | 13(1)    | 9(1)     | 5(1)     | 5(1)     | 6(1)     |
| Cl(1)  | 15(1)    | 21(1)    | 15(1)    | 10(1)    | 9(1)     | 12(1)    |
| P(3)   | 11(1)    | 13(1)    | 10(1)    | 6(1)     | 4(1)     | 6(1)     |
| P(4)   | 11(1)    | 15(1)    | 11(1)    | 6(1)     | 6(1)     | 7(1)     |
| P(1)   | 11(1)    | 15(1)    | 10(1)    | 4(1)     | 5(1)     | 6(1)     |
| P(2)   | 12(1)    | 15(1)    | 12(1)    | 7(1)     | 6(1)     | 7(1)     |
| Cl(2)  | 18(1)    | 24(1)    | 13(1)    | 12(1)    | 10(1)    | 14(1)    |
| C(42)  | 41(2)    | 16(2)    | 18(2)    | 9(2)     | 14(2)    | 11(2)    |
| C(18)  | 9(1)     | 23(2)    | 17(2)    | 9(1)     | 5(1)     | 6(1)     |
| C(38)  | 13(1)    | 20(2)    | 17(2)    | 9(1)     | 7(1)     | 10(1)    |
| C(35)  | 16(2)    | 16(2)    | 11(2)    | 5(1)     | 4(1)     | 7(1)     |
| C(29)  | 12(2)    | 24(2)    | 19(2)    | 11(2)    | 8(1)     | 10(1)    |
| C(34)  | 16(2)    | 26(2)    | 21(2)    | 9(1)     | 4(1)     | 11(1)    |
| C(26)  | 38(2)    | 23(2)    | 18(2)    | 3(1)     | 1(2)     | 7(2)     |
| C(17)  | 20(2)    | 23(2)    | 16(2)    | 11(1)    | 12(1)    | 11(1)    |
| C(4)   | 13(1)    | 19(2)    | 13(2)    | 5(1)     | 4(1)     | 8(1)     |
| C(16)  | 15(1)    | 19(1)    | 19(2)    | 8(1)     | 5(1)     | 8(1)     |
| C(9)   | 30(2)    | 21(2)    | 20(2)    | 2(1)     | 1(1)     | 15(1)    |

|       |       |       |       |       |       |       |
|-------|-------|-------|-------|-------|-------|-------|
| C(57) | 10(1) | 20(2) | 24(2) | 11(1) | 3(1)  | 6(1)  |
| C(47) | 18(1) | 21(1) | 28(2) | 13(1) | 10(1) | 9(1)  |
| C(27) | 36(2) | 20(2) | 22(2) | 4(1)  | 11(2) | 14(2) |
| C(10) | 19(1) | 17(1) | 21(2) | 1(1)  | 5(1)  | 9(1)  |
| C(2)  | 18(1) | 25(2) | 20(2) | 4(1)  | 12(1) | 9(1)  |
| C(50) | 19(2) | 26(2) | 21(2) | 14(1) | 6(1)  | 10(1) |
| C(22) | 12(1) | 24(2) | 15(2) | 11(1) | 6(1)  | 10(1) |
| C(53) | 12(1) | 30(2) | 16(2) | 12(1) | 9(1)  | 12(1) |
| C(8)  | 37(2) | 15(2) | 24(2) | 7(1)  | 11(2) | 9(2)  |
| C(67) | 34(2) | 21(2) | 18(2) | 5(1)  | 10(2) | 14(1) |
| C(45) | 8(2)  | 20(2) | 18(2) | 5(1)  | 3(1)  | 6(1)  |
| C(30) | 18(2) | 30(2) | 22(2) | 12(2) | 4(1)  | 9(1)  |
| C(52) | 9(1)  | 22(2) | 13(2) | 8(1)  | 4(1)  | 9(1)  |
| C(11) | 9(1)  | 18(1) | 18(2) | 7(1)  | 1(1)  | 6(1)  |
| C(31) | 20(2) | 41(2) | 17(2) | 5(2)  | -1(1) | 12(2) |
| C(39) | 18(1) | 11(1) | 14(1) | 4(1)  | 6(1)  | 5(1)  |
| C(48) | 15(2) | 18(1) | 35(2) | 6(1)  | 10(2) | 7(1)  |
| C(32) | 16(2) | 29(2) | 26(2) | 5(2)  | 4(1)  | 7(1)  |
| C(60) | 25(2) | 19(2) | 44(2) | 3(2)  | -3(2) | 8(1)  |
| C(49) | 21(2) | 28(2) | 18(2) | 3(2)  | 0(1)  | 8(2)  |
| C(19) | 25(2) | 14(2) | 20(2) | 10(1) | 10(2) | 8(1)  |
| C(6)  | 17(1) | 16(1) | 25(2) | 6(1)  | 6(1)  | 8(1)  |
| C(41) | 29(2) | 16(1) | 16(2) | 5(1)  | 2(1)  | 9(1)  |
| C(13) | 16(1) | 25(2) | 34(2) | 17(1) | 11(1) | 8(1)  |
| C(59) | 31(2) | 24(2) | 57(3) | 22(2) | 3(2)  | 8(2)  |
| C(65) | 20(2) | 25(2) | 28(2) | 5(1)  | 5(1)  | 10(1) |
| C(20) | 43(2) | 26(2) | 22(2) | 14(1) | 9(2)  | 21(2) |
| C(44) | 19(1) | 16(1) | 23(2) | 6(1)  | 6(1)  | 6(1)  |
| C(58) | 21(2) | 31(2) | 34(2) | 21(2) | 6(1)  | 8(1)  |
| C(62) | 15(1) | 20(1) | 24(2) | 9(1)  | 3(1)  | 3(1)  |
| C(33) | 22(2) | 24(2) | 28(2) | 10(1) | 9(2)  | 11(1) |
| C(24) | 19(1) | 19(1) | 26(2) | 8(1)  | 5(1)  | 6(1)  |
| C(46) | 17(2) | 19(2) | 22(2) | 9(1)  | 8(1)  | 8(1)  |
| C(64) | 21(2) | 22(1) | 23(2) | 4(1)  | 8(1)  | 13(1) |
| C(21) | 22(1) | 27(2) | 21(2) | 13(1) | 9(1)  | 17(1) |

|       |       |       |       |       |       |       |
|-------|-------|-------|-------|-------|-------|-------|
| C(1)  | 12(1) | 19(1) | 12(1) | 2(1)  | 4(1)  | 7(1)  |
| C(12) | 14(1) | 25(1) | 18(2) | 9(1)  | 6(1)  | 9(1)  |
| C(36) | 28(2) | 19(1) | 20(2) | 10(1) | 14(1) | 15(1) |
| C(7)  | 20(2) | 20(2) | 33(2) | 9(2)  | 10(2) | 5(1)  |
| C(3)  | 14(1) | 23(1) | 24(2) | 5(1)  | 9(1)  | 9(1)  |
| C(28) | 22(2) | 22(1) | 22(2) | 8(1)  | 6(1)  | 11(1) |
| C(61) | 22(2) | 25(2) | 30(2) | 3(1)  | 4(1)  | 9(1)  |
| C(51) | 21(2) | 18(2) | 5(1)  | 4(1)  | 4(1)  | 10(1) |
| C(14) | 18(2) | 16(1) | 33(2) | 5(1)  | 2(1)  | 5(1)  |
| C(68) | 22(1) | 21(1) | 20(2) | 10(1) | 10(1) | 12(1) |
| C(23) | 18(1) | 11(1) | 18(2) | 5(1)  | 5(1)  | 4(1)  |
| C(55) | 20(1) | 26(2) | 20(2) | 7(1)  | 7(1)  | 16(1) |
| C(66) | 28(2) | 21(2) | 18(2) | 0(2)  | 1(2)  | 7(2)  |
| C(37) | 20(1) | 24(1) | 23(2) | 12(1) | 13(1) | 15(1) |
| C(5)  | 18(1) | 13(1) | 15(2) | -2(1) | 4(1)  | 6(1)  |
| C(25) | 23(2) | 29(2) | 28(2) | 10(2) | -4(1) | 6(1)  |
| C(15) | 22(2) | 23(2) | 20(2) | 2(1)  | 0(1)  | 9(1)  |
| C(40) | 20(1) | 16(1) | 17(2) | 5(1)  | 6(1)  | 7(1)  |
| C(43) | 25(2) | 17(1) | 28(2) | 7(1)  | 15(1) | 5(1)  |
| C(63) | 18(1) | 14(1) | 17(2) | 7(1)  | 7(1)  | 9(1)  |
| C(56) | 17(1) | 19(1) | 15(2) | 7(1)  | 8(1)  | 11(1) |
| C(54) | 15(1) | 26(2) | 17(2) | 9(1)  | 7(1)  | 13(1) |

---



**Table S12.** Hydrogen coordinates ( $\times 10^4$ ) and isotropic displacement parameters ( $\text{\AA}^2 \times 10^3$ ) for **2**.

|        | y     | z    | U(eq) |    |
|--------|-------|------|-------|----|
| H(42)  | 3156  | 400  | 13599 | 30 |
| H(18A) | 4043  | 4786 | 4819  | 20 |
| H(18B) | 4857  | 6253 | 5144  | 20 |
| H(38)  | 7076  | 4441 | 12888 | 18 |
| H(35)  | 3724  | 2186 | 10267 | 18 |
| H(34)  | 1538  | 3387 | 6336  | 25 |
| H(26)  | 6347  | 9439 | 11641 | 38 |
| H(17A) | 7098  | 6516 | 6167  | 21 |
| H(17B) | 6480  | 5204 | 5122  | 21 |
| H(4)   | 8316  | 4955 | 7991  | 18 |
| H(16)  | 9103  | 6834 | 9520  | 22 |
| H(9)   | 6451  | 1245 | 8031  | 30 |
| H(47)  | 9638  | 8539 | 12299 | 26 |
| H(27)  | 4135  | 9245 | 10576 | 33 |
| H(10)  | 7284  | 2466 | 7074  | 25 |
| H(2A)  | 7156  | 3494 | 4826  | 26 |
| H(2B)  | 7329  | 2620 | 5427  | 26 |
| H(50)  | 8788  | 6208 | 14406 | 26 |
| H(22)  | 1783  | 5593 | 6641  | 18 |
| H(53)  | 399   | 4281 | 11015 | 21 |
| H(8)   | 3967  | 468  | 7950  | 32 |
| H(67)  | 4308  | 9512 | 15164 | 29 |
| H(30)  | 579   | 4380 | 3786  | 29 |
| H(52A) | 3026  | 5436 | 12997 | 17 |
| H(52B) | 2234  | 3983 | 12180 | 17 |
| H(31)  | -927  | 2284 | 2568  | 36 |
| H(48)  | 10939 | 9493 | 14246 | 29 |
| H(32)  | -1188 | 747  | 3214  | 33 |
| H(60)  | -1215 | -116 | 7332  | 42 |
| H(49)  | 10487 | 8322 | 15296 | 32 |
| H(19)  | 5615  | 8019 | 7024  | 23 |

|        |       |       |       |    |
|--------|-------|-------|-------|----|
| H(6)   | 3155  | 2117  | 5930  | 24 |
| H(41)  | 5470  | 870   | 13385 | 27 |
| H(13)  | 11203 | 9106  | 7588  | 29 |
| H(59)  | -1320 | 192   | 9121  | 48 |
| H(65)  | 7624  | 8955  | 14308 | 32 |
| H(20A) | 2926  | 8013  | 7048  | 34 |
| H(20B) | 3799  | 8313  | 6219  | 34 |
| H(44)  | 2204  | 1928  | 11497 | 25 |
| H(58)  | -457  | 2192  | 10477 | 34 |
| H(62)  | 652   | 3601  | 8263  | 26 |
| H(33)  | 51    | 1302  | 5100  | 30 |
| H(24)  | 7130  | 8065  | 8784  | 28 |
| H(46)  | 7954  | 6423  | 11419 | 23 |
| H(64)  | 5961  | 7569  | 12507 | 27 |
| H(21A) | 1274  | 6425  | 5384  | 24 |
| H(21B) | 2565  | 6308  | 4923  | 24 |
| H(1)   | 4989  | 2972  | 5113  | 19 |
| H(12)  | 9772  | 6950  | 6660  | 23 |
| H(36A) | 5786  | 2592  | 9832  | 24 |
| H(36B) | 6100  | 1916  | 10612 | 24 |
| H(7)   | 2311  | 895   | 6880  | 31 |
| H(3A)  | 9311  | 4214  | 6824  | 25 |
| H(3B)  | 9234  | 5054  | 6158  | 25 |
| H(28)  | 3379  | 8429  | 8618  | 27 |
| H(61)  | -258  | 1585  | 6898  | 35 |
| H(51A) | 4436  | 4182  | 13087 | 18 |
| H(51B) | 5323  | 5613  | 13310 | 18 |
| H(14)  | 11677 | 10119 | 9506  | 32 |
| H(68)  | 2609  | 8065  | 13370 | 23 |
| H(55A) | 1043  | 6494  | 11835 | 25 |
| H(55B) | 1401  | 7282  | 11098 | 25 |
| H(66)  | 6800  | 9941  | 15646 | 32 |
| H(37A) | 8159  | 3638  | 11801 | 23 |
| H(37B) | 7916  | 4276  | 10965 | 23 |
| H(25)  | 7852  | 8849  | 10726 | 38 |

S 90

|        |       |      |       |    |
|--------|-------|------|-------|----|
| H(15)  | 10621 | 8974 | 10461 | 30 |
| H(40)  | 6190  | 1919 | 12269 | 22 |
| H(43)  | 1545  | 972  | 12688 | 29 |
| H(56)  | 3503  | 7117 | 11057 | 19 |
| H(54A) | 833   | 5477 | 9519  | 22 |
| H(54B) | -557  | 5139 | 9957  | 22 |

---

**Table S13.** Torsion angles [ $^{\circ}$ ] for **2**.

---

|                         |            |
|-------------------------|------------|
| C(22)-P(2)-C(18)-C(17)  | -167.1(2)  |
| C(19)-P(2)-C(18)-C(17)  | 97.7(3)    |
| Rh(02)-P(2)-C(18)-C(17) | -31.4(3)   |
| C(51)-P(3)-C(38)-C(45)  | -75.3(3)   |
| C(35)-P(3)-C(38)-C(45)  | 172.7(3)   |
| Rh(01)-P(3)-C(38)-C(45) | 52.6(3)    |
| C(51)-P(3)-C(38)-C(37)  | 154.0(2)   |
| C(35)-P(3)-C(38)-C(37)  | 42.0(2)    |
| Rh(01)-P(3)-C(38)-C(37) | -78.1(2)   |
| C(51)-P(3)-C(35)-C(39)  | -18.3(3)   |
| C(38)-P(3)-C(35)-C(39)  | 83.4(3)    |
| Rh(01)-P(3)-C(35)-C(39) | -145.8(2)  |
| C(51)-P(3)-C(35)-C(36)  | -144.8(2)  |
| C(38)-P(3)-C(35)-C(36)  | -43.1(2)   |
| Rh(01)-P(3)-C(35)-C(36) | 87.6(2)    |
| C(30)-C(29)-C(34)-C(33) | 0.6(5)     |
| C(22)-C(29)-C(34)-C(33) | 179.0(3)   |
| P(2)-C(18)-C(17)-P(1)   | 39.3(3)    |
| C(4)-P(1)-C(17)-C(18)   | -167.3(2)  |
| C(1)-P(1)-C(17)-C(18)   | 96.6(2)    |
| Rh(02)-P(1)-C(17)-C(18) | -34.4(2)   |
| C(17)-P(1)-C(4)-C(11)   | 57.7(3)    |
| C(1)-P(1)-C(4)-C(11)    | 161.8(2)   |
| Rh(02)-P(1)-C(4)-C(11)  | -69.6(3)   |
| C(17)-P(1)-C(4)-C(3)    | -72.9(2)   |
| C(1)-P(1)-C(4)-C(3)     | 31.2(2)    |
| Rh(02)-P(1)-C(4)-C(3)   | 159.85(17) |
| C(25)-C(26)-C(27)-C(28) | 0.7(6)     |
| C(8)-C(9)-C(10)-C(5)    | -0.2(4)    |
| C(34)-C(29)-C(22)-C(21) | -175.6(3)  |
| C(30)-C(29)-C(22)-C(21) | 2.8(5)     |
| C(34)-C(29)-C(22)-P(2)  | 63.2(4)    |
| C(30)-C(29)-C(22)-P(2)  | -118.5(3)  |
| C(18)-P(2)-C(22)-C(29)  | 62.0(3)    |

|                         |            |
|-------------------------|------------|
| C(19)-P(2)-C(22)-C(29)  | 167.0(3)   |
| Rh(02)-P(2)-C(22)-C(29) | -66.7(3)   |
| C(18)-P(2)-C(22)-C(21)  | -67.5(2)   |
| C(19)-P(2)-C(22)-C(21)  | 37.5(2)    |
| Rh(02)-P(2)-C(22)-C(21) | 163.72(15) |
| C(62)-C(57)-C(53)-C(54) | 44.2(4)    |
| C(58)-C(57)-C(53)-C(54) | -138.2(3)  |
| C(62)-C(57)-C(53)-P(4)  | -80.3(3)   |
| C(58)-C(57)-C(53)-P(4)  | 97.3(3)    |
| C(52)-P(4)-C(53)-C(57)  | -95.1(2)   |
| C(56)-P(4)-C(53)-C(57)  | 154.7(2)   |
| Rh(01)-P(4)-C(53)-C(57) | 33.4(3)    |
| C(52)-P(4)-C(53)-C(54)  | 132.7(2)   |
| C(56)-P(4)-C(53)-C(54)  | 22.4(2)    |
| Rh(01)-P(4)-C(53)-C(54) | -98.90(19) |
| C(10)-C(9)-C(8)-C(7)    | 0.5(5)     |
| C(49)-C(50)-C(45)-C(46) | -1.0(5)    |
| C(49)-C(50)-C(45)-C(38) | -179.2(3)  |
| C(37)-C(38)-C(45)-C(50) | -117.1(4)  |
| P(3)-C(38)-C(45)-C(50)  | 118.9(3)   |
| C(37)-C(38)-C(45)-C(46) | 64.8(4)    |
| P(3)-C(38)-C(45)-C(46)  | -59.2(4)   |
| C(34)-C(29)-C(30)-C(31) | -0.3(5)    |
| C(22)-C(29)-C(30)-C(31) | -178.6(3)  |
| C(56)-P(4)-C(52)-C(51)  | -110.5(2)  |
| C(53)-P(4)-C(52)-C(51)  | 152.2(2)   |
| Rh(01)-P(4)-C(52)-C(51) | 18.4(3)    |
| C(15)-C(16)-C(11)-C(12) | -1.1(4)    |
| C(15)-C(16)-C(11)-C(4)  | -178.4(3)  |
| C(3)-C(4)-C(11)-C(16)   | -145.2(3)  |
| P(1)-C(4)-C(11)-C(16)   | 90.1(3)    |
| C(3)-C(4)-C(11)-C(12)   | 37.5(4)    |
| P(1)-C(4)-C(11)-C(12)   | -87.1(3)   |
| C(29)-C(30)-C(31)-C(32) | -0.2(6)    |
| C(36)-C(35)-C(39)-C(40) | 12.7(4)    |

|                         |             |
|-------------------------|-------------|
| P(3)-C(35)-C(39)-C(40)  | -105.0(3)   |
| C(36)-C(35)-C(39)-C(44) | -165.4(3)   |
| P(3)-C(35)-C(39)-C(44)  | 76.9(3)     |
| C(46)-C(47)-C(48)-C(49) | -0.9(5)     |
| C(30)-C(31)-C(32)-C(33) | 0.3(6)      |
| C(47)-C(48)-C(49)-C(50) | 0.7(5)      |
| C(45)-C(50)-C(49)-C(48) | 0.3(6)      |
| C(18)-P(2)-C(19)-C(23)  | -146.7(2)   |
| C(22)-P(2)-C(19)-C(23)  | 109.9(3)    |
| Rh(02)-P(2)-C(19)-C(23) | -21.0(3)    |
| C(18)-P(2)-C(19)-C(20)  | 85.3(3)     |
| C(22)-P(2)-C(19)-C(20)  | -18.2(2)    |
| Rh(02)-P(2)-C(19)-C(20) | -149.02(18) |
| C(43)-C(42)-C(41)-C(40) | 0.2(5)      |
| C(61)-C(60)-C(59)-C(58) | -0.2(6)     |
| C(23)-C(19)-C(20)-C(21) | -131.0(3)   |
| P(2)-C(19)-C(20)-C(21)  | -6.5(3)     |
| C(40)-C(39)-C(44)-C(43) | 0.4(4)      |
| C(35)-C(39)-C(44)-C(43) | 178.6(3)    |
| C(60)-C(59)-C(58)-C(57) | -0.7(5)     |
| C(62)-C(57)-C(58)-C(59) | 1.0(5)      |
| C(53)-C(57)-C(58)-C(59) | -176.7(3)   |
| C(58)-C(57)-C(62)-C(61) | -0.4(5)     |
| C(53)-C(57)-C(62)-C(61) | 177.2(3)    |
| C(31)-C(32)-C(33)-C(34) | 0.1(5)      |
| C(29)-C(34)-C(33)-C(32) | -0.6(5)     |
| C(48)-C(47)-C(46)-C(45) | 0.2(5)      |
| C(50)-C(45)-C(46)-C(47) | 0.8(5)      |
| C(38)-C(45)-C(46)-C(47) | 178.9(3)    |
| C(66)-C(65)-C(64)-C(63) | -0.9(5)     |
| C(29)-C(22)-C(21)-C(20) | -174.3(3)   |
| P(2)-C(22)-C(21)-C(20)  | -47.3(3)    |
| C(19)-C(20)-C(21)-C(22) | 35.6(3)     |
| C(3)-C(2)-C(1)-C(5)     | -92.9(3)    |
| C(3)-C(2)-C(1)-P(1)     | 27.6(3)     |

|                         |             |
|-------------------------|-------------|
| C(17)-P(1)-C(1)-C(5)    | -162.4(2)   |
| C(4)-P(1)-C(1)-C(5)     | 91.4(2)     |
| Rh(02)-P(1)-C(1)-C(5)   | -37.3(2)    |
| C(17)-P(1)-C(1)-C(2)    | 72.4(2)     |
| C(4)-P(1)-C(1)-C(2)     | -33.8(2)    |
| Rh(02)-P(1)-C(1)-C(2)   | -162.59(16) |
| C(14)-C(13)-C(12)-C(11) | 1.8(4)      |
| C(16)-C(11)-C(12)-C(13) | -0.5(4)     |
| C(4)-C(11)-C(12)-C(13)  | 176.8(3)    |
| C(39)-C(35)-C(36)-C(37) | -91.4(3)    |
| P(3)-C(35)-C(36)-C(37)  | 33.6(3)     |
| C(5)-C(6)-C(7)-C(8)     | 0.3(5)      |
| C(9)-C(8)-C(7)-C(6)     | -0.5(5)     |
| C(11)-C(4)-C(3)-C(2)    | -147.4(3)   |
| P(1)-C(4)-C(3)-C(2)     | -19.7(3)    |
| C(1)-C(2)-C(3)-C(4)     | -5.5(4)     |
| C(26)-C(27)-C(28)-C(23) | -1.1(5)     |
| C(59)-C(60)-C(61)-C(62) | 0.8(5)      |
| C(57)-C(62)-C(61)-C(60) | -0.5(5)     |
| P(4)-C(52)-C(51)-P(3)   | -29.3(3)    |
| C(38)-P(3)-C(51)-C(52)  | 167.6(2)    |
| C(35)-P(3)-C(51)-C(52)  | -97.6(3)    |
| Rh(01)-P(3)-C(51)-C(52) | 30.7(3)     |
| C(12)-C(13)-C(14)-C(15) | -1.5(5)     |
| C(66)-C(67)-C(68)-C(63) | -1.5(5)     |
| C(27)-C(28)-C(23)-C(24) | 0.8(4)      |
| C(27)-C(28)-C(23)-C(19) | 177.8(3)    |
| C(25)-C(24)-C(23)-C(28) | -0.4(4)     |
| C(25)-C(24)-C(23)-C(19) | -177.4(3)   |
| C(20)-C(19)-C(23)-C(28) | 14.6(4)     |
| P(2)-C(19)-C(23)-C(28)  | -107.5(3)   |
| C(20)-C(19)-C(23)-C(24) | -168.5(3)   |
| P(2)-C(19)-C(23)-C(24)  | 69.4(3)     |
| C(68)-C(67)-C(66)-C(65) | 0.9(6)      |
| C(64)-C(65)-C(66)-C(67) | 0.3(6)      |

|                         |            |
|-------------------------|------------|
| C(45)-C(38)-C(37)-C(36) | -157.6(3)  |
| P(3)-C(38)-C(37)-C(36)  | -27.6(3)   |
| C(35)-C(36)-C(37)-C(38) | -4.5(4)    |
| C(9)-C(10)-C(5)-C(6)    | 0.0(4)     |
| C(9)-C(10)-C(5)-C(1)    | 176.5(3)   |
| C(7)-C(6)-C(5)-C(10)    | 0.0(4)     |
| C(7)-C(6)-C(5)-C(1)     | -176.7(3)  |
| C(2)-C(1)-C(5)-C(10)    | 24.2(4)    |
| P(1)-C(1)-C(5)-C(10)    | -93.9(3)   |
| C(2)-C(1)-C(5)-C(6)     | -159.2(3)  |
| P(1)-C(1)-C(5)-C(6)     | 82.6(3)    |
| C(23)-C(24)-C(25)-C(26) | 0.0(5)     |
| C(27)-C(26)-C(25)-C(24) | -0.2(5)    |
| C(13)-C(14)-C(15)-C(16) | 0.0(5)     |
| C(11)-C(16)-C(15)-C(14) | 1.3(5)     |
| C(44)-C(39)-C(40)-C(41) | 1.4(4)     |
| C(35)-C(39)-C(40)-C(41) | -176.7(3)  |
| C(42)-C(41)-C(40)-C(39) | -1.7(5)    |
| C(41)-C(42)-C(43)-C(44) | 1.6(5)     |
| C(39)-C(44)-C(43)-C(42) | -1.8(5)    |
| C(67)-C(68)-C(63)-C(64) | 0.9(4)     |
| C(67)-C(68)-C(63)-C(56) | -177.7(3)  |
| C(65)-C(64)-C(63)-C(68) | 0.3(4)     |
| C(65)-C(64)-C(63)-C(56) | 179.0(3)   |
| C(68)-C(63)-C(56)-C(55) | 3.9(4)     |
| C(64)-C(63)-C(56)-C(55) | -174.7(3)  |
| C(68)-C(63)-C(56)-P(4)  | -120.9(3)  |
| C(64)-C(63)-C(56)-P(4)  | 60.5(3)    |
| C(54)-C(55)-C(56)-C(63) | -163.1(2)  |
| C(54)-C(55)-C(56)-P(4)  | -34.4(3)   |
| C(52)-P(4)-C(56)-C(63)  | 34.4(2)    |
| C(53)-P(4)-C(56)-C(63)  | 137.5(2)   |
| Rh(01)-P(4)-C(56)-C(63) | -94.52(19) |
| C(52)-P(4)-C(56)-C(55)  | -96.7(2)   |
| C(53)-P(4)-C(56)-C(55)  | 6.4(2)     |



|                         |            |
|-------------------------|------------|
| Rh(01)-P(4)-C(56)-C(55) | 134.38(17) |
| C(56)-C(55)-C(54)-C(53) | 53.0(3)    |
| C(57)-C(53)-C(54)-C(55) | -174.8(2)  |
| P(4)-C(53)-C(54)-C(55)  | -45.6(2)   |

---

Symmetry transformations used to generate equivalent atoms:

## 6.2 [Rh<sub>2</sub>(Ph-BPE)<sub>2</sub>(μ-Cl)(μ-H)] (5)

**Table S14.** Crystal data and structure refinement for **5**.

|                                   |                                                                          |          |
|-----------------------------------|--------------------------------------------------------------------------|----------|
| Identification code               | <b>5</b>                                                                 |          |
| Empirical formula                 | C <sub>34</sub> H <sub>36.50</sub> Cl <sub>10.50</sub> P <sub>2</sub> Rh |          |
| Formula weight                    | 627.70                                                                   |          |
| Temperature                       | 100(2) K                                                                 |          |
| Wavelength                        | 0.71073 Å                                                                |          |
| Crystal system                    | Orthorhombic                                                             |          |
| Space group                       | P2 <sub>1</sub> 2 <sub>1</sub> 2 <sub>1</sub>                            |          |
| Unit cell dimensions              | a = 10.8094(3) Å                                                         | α = 90°. |
|                                   | b = 22.1084(5) Å                                                         | β = 90°. |
|                                   | c = 24.4640(5) Å                                                         | γ = 90°. |
| Volume                            | 5846.4(2) Å <sup>3</sup>                                                 |          |
| Z                                 | 8                                                                        |          |
| Density (calculated)              | 1.426 Mg/m <sup>3</sup>                                                  |          |
| Absorption coefficient            | 0.761 mm <sup>-1</sup>                                                   |          |
| F(000)                            | 2592                                                                     |          |
| Crystal size                      | 0.303 x 0.201 x 0.199 mm <sup>3</sup>                                    |          |
| Theta range for data collection   | 1.241 to 27.173°.                                                        |          |
| Index ranges                      | -13 ≤ h ≤ 8, -28 ≤ k ≤ 15, -31 ≤ l ≤ 30                                  |          |
| Reflections collected             | 28950                                                                    |          |
| Independent reflections           | 12742 [R(int) = 0.0219]                                                  |          |
| Completeness to theta = 25.242°   | 100.0 %                                                                  |          |
| Absorption correction             | Semi-empirical from equivalents                                          |          |
| Max. and min. transmission        | 1.0 and 0.89                                                             |          |
| Refinement method                 | Full-matrix least-squares on F <sup>2</sup>                              |          |
| Data / restraints / parameters    | 12742 / 48 / 669                                                         |          |
| Goodness-of-fit on F <sup>2</sup> | 1.071                                                                    |          |

S 97

|                               |                                    |
|-------------------------------|------------------------------------|
| Final R indices [I>2sigma(I)] | R1 = 0.0248, wR2 = 0.0566          |
| R indices (all data)          | R1 = 0.0288, wR2 = 0.0627          |
| Absolute structure parameter  | -0.021(8)                          |
| Extinction coefficient        | n/a                                |
| Largest diff. peak and hole   | 0.605 and -0.355 e.Å <sup>-3</sup> |

**Table S15.** Atomic coordinates ( $\times 10^4$ ) and equivalent isotropic displacement parameters ( $\text{\AA}^2 \times 10^3$ ) for **5**.  $U(\text{eq})$  is defined as one third of the trace of the orthogonalized  $U_{ij}$  tensor.

|        | x        | y       | z       | $U(\text{eq})$ |
|--------|----------|---------|---------|----------------|
| Rh(01) | 8080(1)  | 5872(1) | 7107(1) | 14(1)          |
| Rh(02) | 7493(1)  | 5556(1) | 6023(1) | 14(1)          |
| Cl(03) | 9285(1)  | 6104(1) | 6309(1) | 18(1)          |
| P(3)   | 5759(1)  | 5136(1) | 5809(1) | 15(1)          |
| P(2)   | 7080(1)  | 5546(1) | 7815(1) | 16(1)          |
| P(1)   | 9282(1)  | 6360(1) | 7686(1) | 17(1)          |
| P(4)   | 7876(1)  | 5552(1) | 5145(1) | 17(1)          |
| C(22)  | 5457(3)  | 5789(2) | 7958(1) | 19(1)          |
| C(29)  | 5401(4)  | 6427(2) | 8186(2) | 23(1)          |
| C(47)  | 5690(4)  | 3873(2) | 5584(2) | 24(1)          |
| C(40)  | 5601(4)  | 4327(1) | 6043(1) | 18(1)          |
| C(38)  | 4170(4)  | 4954(2) | 6611(1) | 19(1)          |
| C(43)  | 4409(4)  | 6992(2) | 6573(2) | 23(1)          |
| C(56)  | 8112(4)  | 6314(2) | 4820(1) | 21(1)          |
| C(63)  | 6913(4)  | 6600(2) | 4657(1) | 21(1)          |
| C(23)  | 7185(3)  | 4250(2) | 7553(2) | 22(1)          |
| C(6)   | 10941(4) | 6096(2) | 7682(2) | 24(1)          |
| C(37)  | 4237(3)  | 5352(2) | 6100(1) | 18(1)          |
| C(44)  | 3367(4)  | 7234(2) | 6327(2) | 24(1)          |
| C(34)  | 5881(4)  | 6902(2) | 7884(2) | 23(1)          |
| C(41)  | 3976(3)  | 6020(2) | 6176(1) | 17(1)          |
| C(39)  | 4442(4)  | 4309(2) | 6411(1) | 21(1)          |
| C(60)  | 11127(4) | 3839(2) | 5749(2) | 36(1)          |
| C(57)  | 9954(4)  | 4749(2) | 5152(2) | 24(1)          |
| C(19)  | 6726(3)  | 4722(2) | 7952(1) | 21(1)          |
| C(35)  | 5443(4)  | 5186(2) | 5070(1) | 18(1)          |
| C(36)  | 6659(4)  | 5159(2) | 4756(1) | 20(1)          |
| C(21)  | 4902(4)  | 5288(2) | 8304(1) | 24(1)          |
| C(53)  | 9300(4)  | 5225(2) | 4817(2) | 23(1)          |
| C(24)  | 6603(4)  | 3689(2) | 7522(2) | 31(1)          |
| C(30)  | 4875(4)  | 6551(2) | 8694(2) | 31(1)          |

|       |          |         |         |       |
|-------|----------|---------|---------|-------|
| C(3)  | 9742(4)  | 7165(2) | 7604(2) | 25(1) |
| C(27) | 8581(4)  | 3907(2) | 6837(2) | 34(1) |
| C(64) | 6430(4)  | 6565(2) | 4129(1) | 23(1) |
| C(58) | 10635(4) | 4888(2) | 5613(2) | 29(1) |
| C(28) | 8197(4)  | 4347(2) | 7210(2) | 25(1) |
| C(20) | 5321(4)  | 4691(2) | 8056(2) | 22(1) |
| C(52) | 4666(5)  | 3683(2) | 5284(2) | 34(1) |
| C(42) | 4718(4)  | 6387(2) | 6498(1) | 20(1) |
| C(33) | 5897(4)  | 7486(2) | 8091(2) | 32(1) |
| C(4)  | 10935(4) | 7116(2) | 7272(2) | 27(1) |
| C(45) | 2630(4)  | 6876(2) | 6004(2) | 27(1) |
| C(46) | 2931(4)  | 6266(2) | 5930(2) | 24(1) |
| C(1)  | 8666(3)  | 6325(2) | 8383(1) | 20(1) |
| C(5)  | 11738(4) | 6660(2) | 7568(2) | 34(1) |
| C(48) | 6844(5)  | 3643(2) | 5443(2) | 35(1) |
| C(26) | 7974(5)  | 3352(2) | 6816(2) | 37(1) |
| C(7)  | 8815(4)  | 7613(2) | 7386(2) | 30(1) |
| C(54) | 10057(4) | 5782(2) | 4640(2) | 28(1) |
| C(25) | 7004(4)  | 3244(2) | 7159(2) | 38(1) |
| C(61) | 10440(5) | 3698(2) | 5298(2) | 38(1) |
| C(59) | 11215(4) | 4436(2) | 5911(2) | 34(1) |
| C(55) | 9130(4)  | 6224(2) | 4394(2) | 27(1) |
| C(8)  | 8107(4)  | 7499(2) | 6924(2) | 30(1) |
| C(68) | 6197(4)  | 6886(2) | 5060(2) | 26(1) |
| C(32) | 5411(5)  | 7600(2) | 8602(2) | 43(1) |
| C(65) | 5289(4)  | 6819(2) | 4003(2) | 29(1) |
| C(2)  | 7929(4)  | 5744(2) | 8455(1) | 21(1) |
| C(66) | 4605(4)  | 7103(2) | 4402(2) | 36(1) |
| C(62) | 9846(4)  | 4143(2) | 5002(2) | 32(1) |
| C(12) | 8701(5)  | 8176(2) | 7635(2) | 51(1) |
| C(31) | 4891(5)  | 7137(2) | 8896(2) | 44(1) |
| C(50) | 5957(7)  | 3045(2) | 4728(2) | 57(2) |
| C(67) | 5056(5)  | 7133(2) | 4934(2) | 34(1) |
| C(10) | 7222(5)  | 8495(2) | 6972(3) | 66(2) |
| C(51) | 4808(6)  | 3263(2) | 4860(2) | 48(2) |

S 100

|       |          |         |         |       |
|-------|----------|---------|---------|-------|
| C(9)  | 7304(4)  | 7936(2) | 6718(2) | 45(1) |
| C(11) | 7923(6)  | 8610(2) | 7427(3) | 71(2) |
| C(49) | 6972(7)  | 3230(2) | 5012(2) | 52(2) |
| C(14) | 11047(3) | 5096(1) | 8157(1) | 52(1) |
| C(13) | 11273(3) | 5714(1) | 8181(1) | 27(1) |
| C(18) | 11761(3) | 5969(1) | 8654(1) | 34(1) |
| C(17) | 12023(3) | 5605(2) | 9102(1) | 61(2) |
| C(16) | 11797(3) | 4987(2) | 9078(1) | 85(2) |
| C(15) | 11309(3) | 4732(1) | 8606(2) | 80(2) |

---

**Table S16.** Bond lengths [Å] and angles [°] for **5**.

---

|               |            |
|---------------|------------|
| Rh(01)-P(2)   | 2.1656(9)  |
| Rh(01)-P(1)   | 2.2055(10) |
| Rh(01)-Cl(03) | 2.4018(8)  |
| Rh(01)-Rh(02) | 2.8136(3)  |
| Rh(01)-H(1)   | 1.68(5)    |
| Rh(02)-P(3)   | 2.1559(10) |
| Rh(02)-P(4)   | 2.1886(8)  |
| Rh(02)-Cl(03) | 2.3895(9)  |
| Rh(02)-H(1)   | 1.77(5)    |
| P(3)-C(35)    | 1.842(3)   |
| P(3)-C(37)    | 1.854(4)   |
| P(3)-C(40)    | 1.888(3)   |
| P(2)-C(2)     | 1.867(4)   |
| P(2)-C(22)    | 1.869(4)   |
| P(2)-C(19)    | 1.893(3)   |
| P(1)-C(1)     | 1.832(4)   |
| P(1)-C(3)     | 1.858(4)   |
| P(1)-C(6)     | 1.886(4)   |
| P(4)-C(36)    | 1.841(4)   |
| P(4)-C(53)    | 1.879(4)   |
| P(4)-C(56)    | 1.881(3)   |
| C(22)-C(29)   | 1.517(5)   |
| C(22)-C(21)   | 1.519(5)   |
| C(22)-H(22)   | 1.0000     |
| C(29)-C(34)   | 1.383(5)   |
| C(29)-C(30)   | 1.396(5)   |
| C(47)-C(48)   | 1.389(7)   |
| C(47)-C(52)   | 1.392(6)   |
| C(47)-C(40)   | 1.509(5)   |
| C(40)-C(39)   | 1.544(5)   |
| C(40)-H(40)   | 1.0000     |
| C(38)-C(37)   | 1.531(5)   |
| C(38)-C(39)   | 1.535(5)   |

|              |          |
|--------------|----------|
| C(38)-H(38A) | 0.9900   |
| C(38)-H(38B) | 0.9900   |
| C(43)-C(44)  | 1.384(6) |
| C(43)-C(42)  | 1.392(5) |
| C(43)-H(43)  | 0.9500   |
| C(56)-C(63)  | 1.496(6) |
| C(56)-C(55)  | 1.529(5) |
| C(56)-H(56)  | 1.0000   |
| C(63)-C(64)  | 1.395(5) |
| C(63)-C(68)  | 1.403(5) |
| C(23)-C(24)  | 1.394(5) |
| C(23)-C(28)  | 1.395(5) |
| C(23)-C(19)  | 1.512(5) |
| C(6)-C(13)   | 1.526(4) |
| C(6)-C(5)    | 1.542(5) |
| C(6)-H(6)    | 1.0000   |
| C(37)-C(41)  | 1.516(5) |
| C(37)-H(37)  | 1.0000   |
| C(44)-C(45)  | 1.372(5) |
| C(44)-H(44)  | 0.9500   |
| C(34)-C(33)  | 1.389(5) |
| C(34)-H(34)  | 0.9500   |
| C(41)-C(42)  | 1.387(5) |
| C(41)-C(46)  | 1.392(5) |
| C(39)-H(39A) | 0.9900   |
| C(39)-H(39B) | 0.9900   |
| C(60)-C(61)  | 1.367(7) |
| C(60)-C(59)  | 1.381(6) |
| C(60)-H(60)  | 0.9500   |
| C(57)-C(58)  | 1.383(6) |
| C(57)-C(62)  | 1.393(5) |
| C(57)-C(53)  | 1.508(5) |
| C(19)-C(20)  | 1.542(5) |
| C(19)-H(19)  | 1.0000   |
| C(35)-C(36)  | 1.524(5) |

|              |          |
|--------------|----------|
| C(35)-H(35A) | 0.9900   |
| C(35)-H(35B) | 0.9900   |
| C(36)-H(36A) | 0.9900   |
| C(36)-H(36B) | 0.9900   |
| C(21)-C(20)  | 1.521(5) |
| C(21)-H(21A) | 0.9900   |
| C(21)-H(21B) | 0.9900   |
| C(53)-C(54)  | 1.542(5) |
| C(53)-H(53)  | 1.0000   |
| C(24)-C(25)  | 1.395(6) |
| C(24)-H(24)  | 0.9500   |
| C(30)-C(31)  | 1.388(6) |
| C(30)-H(30)  | 0.9500   |
| C(3)-C(7)    | 1.505(6) |
| C(3)-C(4)    | 1.527(5) |
| C(3)-H(3)    | 1.0000   |
| C(27)-C(26)  | 1.392(6) |
| C(27)-C(28)  | 1.398(5) |
| C(27)-H(27)  | 0.9500   |
| C(64)-C(65)  | 1.391(6) |
| C(64)-H(64)  | 0.9500   |
| C(58)-C(59)  | 1.388(6) |
| C(58)-H(58)  | 0.9500   |
| C(28)-H(28)  | 0.9500   |
| C(20)-H(20A) | 0.9900   |
| C(20)-H(20B) | 0.9900   |
| C(52)-C(51)  | 1.401(6) |
| C(52)-H(52)  | 0.9500   |
| C(42)-H(42)  | 0.9500   |
| C(33)-C(32)  | 1.378(6) |
| C(33)-H(33)  | 0.9500   |
| C(4)-C(5)    | 1.515(6) |
| C(4)-H(4A)   | 0.9900   |
| C(4)-H(4B)   | 0.9900   |
| C(45)-C(46)  | 1.398(5) |



|              |          |
|--------------|----------|
| C(45)-H(45)  | 0.9500   |
| C(46)-H(46)  | 0.9500   |
| C(1)-C(2)    | 1.521(5) |
| C(1)-H(1A)   | 0.9900   |
| C(1)-H(1B)   | 0.9900   |
| C(5)-H(5A)   | 0.9900   |
| C(5)-H(5B)   | 0.9900   |
| C(48)-C(49)  | 1.400(6) |
| C(48)-H(48)  | 0.9500   |
| C(26)-C(25)  | 1.363(7) |
| C(26)-H(26)  | 0.9500   |
| C(7)-C(8)    | 1.389(6) |
| C(7)-C(12)   | 1.391(6) |
| C(54)-C(55)  | 1.524(6) |
| C(54)-H(54A) | 0.9900   |
| C(54)-H(54B) | 0.9900   |
| C(25)-H(25)  | 0.9500   |
| C(61)-C(62)  | 1.380(6) |
| C(61)-H(61)  | 0.9500   |
| C(59)-H(59)  | 0.9500   |
| C(55)-H(55A) | 0.9900   |
| C(55)-H(55B) | 0.9900   |
| C(8)-C(9)    | 1.394(6) |
| C(8)-H(8)    | 0.9500   |
| C(68)-C(67)  | 1.384(6) |
| C(68)-H(68)  | 0.9500   |
| C(32)-C(31)  | 1.372(7) |
| C(32)-H(32)  | 0.9500   |
| C(65)-C(66)  | 1.377(6) |
| C(65)-H(65)  | 0.9500   |
| C(2)-H(2A)   | 0.9900   |
| C(2)-H(2B)   | 0.9900   |
| C(66)-C(67)  | 1.391(6) |
| C(66)-H(66)  | 0.9500   |
| C(62)-H(62)  | 0.9500   |

|                      |           |
|----------------------|-----------|
| C(12)-C(11)          | 1.373(8)  |
| C(12)-H(12)          | 0.9500    |
| C(31)-H(31)          | 0.9500    |
| C(50)-C(49)          | 1.363(9)  |
| C(50)-C(51)          | 1.371(9)  |
| C(50)-H(50)          | 0.9500    |
| C(67)-H(67)          | 0.9500    |
| C(10)-C(11)          | 1.369(9)  |
| C(10)-C(9)           | 1.388(7)  |
| C(10)-H(10)          | 0.9500    |
| C(51)-H(51)          | 0.9500    |
| C(9)-H(9)            | 0.9500    |
| C(11)-H(11)          | 0.9500    |
| C(49)-H(49)          | 0.9500    |
| C(14)-C(13)          | 1.3900    |
| C(14)-C(15)          | 1.3900    |
| C(14)-H(14)          | 0.9500    |
| C(13)-C(18)          | 1.3900    |
| C(18)-C(17)          | 1.3900    |
| C(18)-H(18)          | 0.9500    |
| C(17)-C(16)          | 1.3900    |
| C(17)-H(17)          | 0.9500    |
| C(16)-C(15)          | 1.3900    |
| C(16)-H(16)          | 0.9500    |
| C(15)-H(15)          | 0.9500    |
|                      |           |
| P(2)-Rh(01)-P(1)     | 86.69(3)  |
| P(2)-Rh(01)-Cl(03)   | 172.77(3) |
| P(1)-Rh(01)-Cl(03)   | 95.62(3)  |
| P(2)-Rh(01)-Rh(02)   | 123.99(3) |
| P(1)-Rh(01)-Rh(02)   | 149.30(3) |
| Cl(03)-Rh(01)-Rh(02) | 53.84(2)  |
| P(2)-Rh(01)-H(1)     | 87.5(17)  |
| P(1)-Rh(01)-H(1)     | 174.1(16) |
| Cl(03)-Rh(01)-H(1)   | 90.0(17)  |

|                      |            |
|----------------------|------------|
| Rh(02)-Rh(01)-H(1)   | 36.5(16)   |
| P(3)-Rh(02)-P(4)     | 85.64(3)   |
| P(3)-Rh(02)-Cl(03)   | 173.77(3)  |
| P(4)-Rh(02)-Cl(03)   | 97.82(3)   |
| P(3)-Rh(02)-Rh(01)   | 122.14(3)  |
| P(4)-Rh(02)-Rh(01)   | 152.06(3)  |
| Cl(03)-Rh(02)-Rh(01) | 54.24(2)   |
| P(3)-Rh(02)-H(1)     | 88.8(17)   |
| P(4)-Rh(02)-H(1)     | 172.5(15)  |
| Cl(03)-Rh(02)-H(1)   | 88.2(17)   |
| Rh(01)-Rh(02)-H(1)   | 34.3(17)   |
| Rh(02)-Cl(03)-Rh(01) | 71.92(3)   |
| C(35)-P(3)-C(37)     | 101.35(17) |
| C(35)-P(3)-C(40)     | 109.70(15) |
| C(37)-P(3)-C(40)     | 92.65(16)  |
| C(35)-P(3)-Rh(02)    | 111.97(13) |
| C(37)-P(3)-Rh(02)    | 124.59(12) |
| C(40)-P(3)-Rh(02)    | 114.40(12) |
| C(2)-P(2)-C(22)      | 103.72(16) |
| C(2)-P(2)-C(19)      | 100.14(16) |
| C(22)-P(2)-C(19)     | 93.09(16)  |
| C(2)-P(2)-Rh(01)     | 110.40(12) |
| C(22)-P(2)-Rh(01)    | 121.55(11) |
| C(19)-P(2)-Rh(01)    | 124.23(12) |
| C(1)-P(1)-C(3)       | 103.84(17) |
| C(1)-P(1)-C(6)       | 109.67(17) |
| C(3)-P(1)-C(6)       | 92.41(19)  |
| C(1)-P(1)-Rh(01)     | 111.27(12) |
| C(3)-P(1)-Rh(01)     | 123.88(13) |
| C(6)-P(1)-Rh(01)     | 113.87(12) |
| C(36)-P(4)-C(53)     | 100.56(17) |
| C(36)-P(4)-C(56)     | 107.60(17) |
| C(53)-P(4)-C(56)     | 93.12(17)  |
| C(36)-P(4)-Rh(02)    | 111.93(12) |
| C(53)-P(4)-Rh(02)    | 125.07(12) |

|                     |            |
|---------------------|------------|
| C(56)-P(4)-Rh(02)   | 115.89(11) |
| C(29)-C(22)-C(21)   | 117.3(3)   |
| C(29)-C(22)-P(2)    | 111.9(2)   |
| C(21)-C(22)-P(2)    | 105.4(2)   |
| C(29)-C(22)-H(22)   | 107.3      |
| C(21)-C(22)-H(22)   | 107.3      |
| P(2)-C(22)-H(22)    | 107.3      |
| C(34)-C(29)-C(30)   | 118.6(4)   |
| C(34)-C(29)-C(22)   | 119.7(3)   |
| C(30)-C(29)-C(22)   | 121.7(4)   |
| C(48)-C(47)-C(52)   | 118.2(4)   |
| C(48)-C(47)-C(40)   | 119.0(4)   |
| C(52)-C(47)-C(40)   | 122.7(4)   |
| C(47)-C(40)-C(39)   | 118.0(3)   |
| C(47)-C(40)-P(3)    | 113.5(2)   |
| C(39)-C(40)-P(3)    | 106.0(2)   |
| C(47)-C(40)-H(40)   | 106.2      |
| C(39)-C(40)-H(40)   | 106.2      |
| P(3)-C(40)-H(40)    | 106.2      |
| C(37)-C(38)-C(39)   | 105.4(3)   |
| C(37)-C(38)-H(38A)  | 110.7      |
| C(39)-C(38)-H(38A)  | 110.7      |
| C(37)-C(38)-H(38B)  | 110.7      |
| C(39)-C(38)-H(38B)  | 110.7      |
| H(38A)-C(38)-H(38B) | 108.8      |
| C(44)-C(43)-C(42)   | 120.5(4)   |
| C(44)-C(43)-H(43)   | 119.7      |
| C(42)-C(43)-H(43)   | 119.7      |
| C(63)-C(56)-C(55)   | 119.8(3)   |
| C(63)-C(56)-P(4)    | 111.9(3)   |
| C(55)-C(56)-P(4)    | 105.6(2)   |
| C(63)-C(56)-H(56)   | 106.2      |
| C(55)-C(56)-H(56)   | 106.2      |
| P(4)-C(56)-H(56)    | 106.2      |
| C(64)-C(63)-C(68)   | 118.0(4)   |

|                     |          |
|---------------------|----------|
| C(64)-C(63)-C(56)   | 123.1(3) |
| C(68)-C(63)-C(56)   | 118.8(3) |
| C(24)-C(23)-C(28)   | 117.3(4) |
| C(24)-C(23)-C(19)   | 120.0(3) |
| C(28)-C(23)-C(19)   | 122.7(3) |
| C(13)-C(6)-C(5)     | 117.5(3) |
| C(13)-C(6)-P(1)     | 113.1(2) |
| C(5)-C(6)-P(1)      | 106.3(3) |
| C(13)-C(6)-H(6)     | 106.4    |
| C(5)-C(6)-H(6)      | 106.4    |
| P(1)-C(6)-H(6)      | 106.4    |
| C(41)-C(37)-C(38)   | 116.8(3) |
| C(41)-C(37)-P(3)    | 117.5(3) |
| C(38)-C(37)-P(3)    | 102.0(2) |
| C(41)-C(37)-H(37)   | 106.5    |
| C(38)-C(37)-H(37)   | 106.5    |
| P(3)-C(37)-H(37)    | 106.5    |
| C(45)-C(44)-C(43)   | 120.1(3) |
| C(45)-C(44)-H(44)   | 120.0    |
| C(43)-C(44)-H(44)   | 120.0    |
| C(29)-C(34)-C(33)   | 121.1(4) |
| C(29)-C(34)-H(34)   | 119.5    |
| C(33)-C(34)-H(34)   | 119.5    |
| C(42)-C(41)-C(46)   | 119.1(3) |
| C(42)-C(41)-C(37)   | 122.2(3) |
| C(46)-C(41)-C(37)   | 118.7(3) |
| C(38)-C(39)-C(40)   | 108.5(3) |
| C(38)-C(39)-H(39A)  | 110.0    |
| C(40)-C(39)-H(39A)  | 110.0    |
| C(38)-C(39)-H(39B)  | 110.0    |
| C(40)-C(39)-H(39B)  | 110.0    |
| H(39A)-C(39)-H(39B) | 108.4    |
| C(61)-C(60)-C(59)   | 119.1(4) |
| C(61)-C(60)-H(60)   | 120.5    |
| C(59)-C(60)-H(60)   | 120.5    |

|                     |          |
|---------------------|----------|
| C(58)-C(57)-C(62)   | 118.2(4) |
| C(58)-C(57)-C(53)   | 122.4(3) |
| C(62)-C(57)-C(53)   | 119.3(4) |
| C(23)-C(19)-C(20)   | 113.6(3) |
| C(23)-C(19)-P(2)    | 118.9(2) |
| C(20)-C(19)-P(2)    | 105.7(2) |
| C(23)-C(19)-H(19)   | 105.9    |
| C(20)-C(19)-H(19)   | 105.9    |
| P(2)-C(19)-H(19)    | 105.9    |
| C(36)-C(35)-P(3)    | 109.4(3) |
| C(36)-C(35)-H(35A)  | 109.8    |
| P(3)-C(35)-H(35A)   | 109.8    |
| C(36)-C(35)-H(35B)  | 109.8    |
| P(3)-C(35)-H(35B)   | 109.8    |
| H(35A)-C(35)-H(35B) | 108.2    |
| C(35)-C(36)-P(4)    | 109.7(2) |
| C(35)-C(36)-H(36A)  | 109.7    |
| P(4)-C(36)-H(36A)   | 109.7    |
| C(35)-C(36)-H(36B)  | 109.7    |
| P(4)-C(36)-H(36B)   | 109.7    |
| H(36A)-C(36)-H(36B) | 108.2    |
| C(22)-C(21)-C(20)   | 107.0(3) |
| C(22)-C(21)-H(21A)  | 110.3    |
| C(20)-C(21)-H(21A)  | 110.3    |
| C(22)-C(21)-H(21B)  | 110.3    |
| C(20)-C(21)-H(21B)  | 110.3    |
| H(21A)-C(21)-H(21B) | 108.6    |
| C(57)-C(53)-C(54)   | 117.5(3) |
| C(57)-C(53)-P(4)    | 114.9(3) |
| C(54)-C(53)-P(4)    | 104.3(3) |
| C(57)-C(53)-H(53)   | 106.5    |
| C(54)-C(53)-H(53)   | 106.5    |
| P(4)-C(53)-H(53)    | 106.5    |
| C(23)-C(24)-C(25)   | 121.4(4) |
| C(23)-C(24)-H(24)   | 119.3    |

|                     |          |
|---------------------|----------|
| C(25)-C(24)-H(24)   | 119.3    |
| C(31)-C(30)-C(29)   | 119.7(4) |
| C(31)-C(30)-H(30)   | 120.1    |
| C(29)-C(30)-H(30)   | 120.1    |
| C(7)-C(3)-C(4)      | 114.9(3) |
| C(7)-C(3)-P(1)      | 119.3(3) |
| C(4)-C(3)-P(1)      | 102.5(3) |
| C(7)-C(3)-H(3)      | 106.4    |
| C(4)-C(3)-H(3)      | 106.4    |
| P(1)-C(3)-H(3)      | 106.4    |
| C(26)-C(27)-C(28)   | 119.7(4) |
| C(26)-C(27)-H(27)   | 120.1    |
| C(28)-C(27)-H(27)   | 120.1    |
| C(65)-C(64)-C(63)   | 121.0(4) |
| C(65)-C(64)-H(64)   | 119.5    |
| C(63)-C(64)-H(64)   | 119.5    |
| C(57)-C(58)-C(59)   | 120.6(4) |
| C(57)-C(58)-H(58)   | 119.7    |
| C(59)-C(58)-H(58)   | 119.7    |
| C(23)-C(28)-C(27)   | 121.3(4) |
| C(23)-C(28)-H(28)   | 119.4    |
| C(27)-C(28)-H(28)   | 119.4    |
| C(21)-C(20)-C(19)   | 108.8(3) |
| C(21)-C(20)-H(20A)  | 109.9    |
| C(19)-C(20)-H(20A)  | 109.9    |
| C(21)-C(20)-H(20B)  | 109.9    |
| C(19)-C(20)-H(20B)  | 109.9    |
| H(20A)-C(20)-H(20B) | 108.3    |
| C(47)-C(52)-C(51)   | 120.2(5) |
| C(47)-C(52)-H(52)   | 119.9    |
| C(51)-C(52)-H(52)   | 119.9    |
| C(41)-C(42)-C(43)   | 120.0(4) |
| C(41)-C(42)-H(42)   | 120.0    |
| C(43)-C(42)-H(42)   | 120.0    |
| C(32)-C(33)-C(34)   | 119.8(4) |

|                   |          |
|-------------------|----------|
| C(32)-C(33)-H(33) | 120.1    |
| C(34)-C(33)-H(33) | 120.1    |
| C(5)-C(4)-C(3)    | 106.1(3) |
| C(5)-C(4)-H(4A)   | 110.5    |
| C(3)-C(4)-H(4A)   | 110.5    |
| C(5)-C(4)-H(4B)   | 110.5    |
| C(3)-C(4)-H(4B)   | 110.5    |
| H(4A)-C(4)-H(4B)  | 108.7    |
| C(44)-C(45)-C(46) | 119.7(4) |
| C(44)-C(45)-H(45) | 120.1    |
| C(46)-C(45)-H(45) | 120.1    |
| C(41)-C(46)-C(45) | 120.7(4) |
| C(41)-C(46)-H(46) | 119.7    |
| C(45)-C(46)-H(46) | 119.7    |
| C(2)-C(1)-P(1)    | 109.6(2) |
| C(2)-C(1)-H(1A)   | 109.8    |
| P(1)-C(1)-H(1A)   | 109.8    |
| C(2)-C(1)-H(1B)   | 109.8    |
| P(1)-C(1)-H(1B)   | 109.8    |
| H(1A)-C(1)-H(1B)  | 108.2    |
| C(4)-C(5)-C(6)    | 107.8(3) |
| C(4)-C(5)-H(5A)   | 110.1    |
| C(6)-C(5)-H(5A)   | 110.1    |
| C(4)-C(5)-H(5B)   | 110.1    |
| C(6)-C(5)-H(5B)   | 110.1    |
| H(5A)-C(5)-H(5B)  | 108.5    |
| C(47)-C(48)-C(49) | 120.9(5) |
| C(47)-C(48)-H(48) | 119.5    |
| C(49)-C(48)-H(48) | 119.5    |
| C(25)-C(26)-C(27) | 119.7(4) |
| C(25)-C(26)-H(26) | 120.1    |
| C(27)-C(26)-H(26) | 120.1    |
| C(8)-C(7)-C(12)   | 118.0(4) |
| C(8)-C(7)-C(3)    | 122.4(3) |
| C(12)-C(7)-C(3)   | 119.6(4) |



|                     |          |
|---------------------|----------|
| C(55)-C(54)-C(53)   | 105.9(3) |
| C(55)-C(54)-H(54A)  | 110.5    |
| C(53)-C(54)-H(54A)  | 110.5    |
| C(55)-C(54)-H(54B)  | 110.5    |
| C(53)-C(54)-H(54B)  | 110.5    |
| H(54A)-C(54)-H(54B) | 108.7    |
| C(26)-C(25)-C(24)   | 120.5(4) |
| C(26)-C(25)-H(25)   | 119.8    |
| C(24)-C(25)-H(25)   | 119.8    |
| C(60)-C(61)-C(62)   | 120.9(4) |
| C(60)-C(61)-H(61)   | 119.5    |
| C(62)-C(61)-H(61)   | 119.5    |
| C(60)-C(59)-C(58)   | 120.5(4) |
| C(60)-C(59)-H(59)   | 119.7    |
| C(58)-C(59)-H(59)   | 119.7    |
| C(54)-C(55)-C(56)   | 106.8(3) |
| C(54)-C(55)-H(55A)  | 110.4    |
| C(56)-C(55)-H(55A)  | 110.4    |
| C(54)-C(55)-H(55B)  | 110.4    |
| C(56)-C(55)-H(55B)  | 110.4    |
| H(55A)-C(55)-H(55B) | 108.6    |
| C(7)-C(8)-C(9)      | 120.8(4) |
| C(7)-C(8)-H(8)      | 119.6    |
| C(9)-C(8)-H(8)      | 119.6    |
| C(67)-C(68)-C(63)   | 120.9(4) |
| C(67)-C(68)-H(68)   | 119.6    |
| C(63)-C(68)-H(68)   | 119.6    |
| C(31)-C(32)-C(33)   | 119.7(4) |
| C(31)-C(32)-H(32)   | 120.1    |
| C(33)-C(32)-H(32)   | 120.1    |
| C(66)-C(65)-C(64)   | 120.2(4) |
| C(66)-C(65)-H(65)   | 119.9    |
| C(64)-C(65)-H(65)   | 119.9    |
| C(1)-C(2)-P(2)      | 110.9(2) |
| C(1)-C(2)-H(2A)     | 109.5    |

|                   |          |
|-------------------|----------|
| P(2)-C(2)-H(2A)   | 109.5    |
| C(1)-C(2)-H(2B)   | 109.5    |
| P(2)-C(2)-H(2B)   | 109.5    |
| H(2A)-C(2)-H(2B)  | 108.0    |
| C(65)-C(66)-C(67) | 119.9(4) |
| C(65)-C(66)-H(66) | 120.1    |
| C(67)-C(66)-H(66) | 120.1    |
| C(61)-C(62)-C(57) | 120.6(4) |
| C(61)-C(62)-H(62) | 119.7    |
| C(57)-C(62)-H(62) | 119.7    |
| C(11)-C(12)-C(7)  | 121.2(6) |
| C(11)-C(12)-H(12) | 119.4    |
| C(7)-C(12)-H(12)  | 119.4    |
| C(32)-C(31)-C(30) | 121.0(4) |
| C(32)-C(31)-H(31) | 119.5    |
| C(30)-C(31)-H(31) | 119.5    |
| C(49)-C(50)-C(51) | 120.2(4) |
| C(49)-C(50)-H(50) | 119.9    |
| C(51)-C(50)-H(50) | 119.9    |
| C(68)-C(67)-C(66) | 120.1(4) |
| C(68)-C(67)-H(67) | 119.9    |
| C(66)-C(67)-H(67) | 119.9    |
| C(11)-C(10)-C(9)  | 119.7(5) |
| C(11)-C(10)-H(10) | 120.2    |
| C(9)-C(10)-H(10)  | 120.2    |
| C(50)-C(51)-C(52) | 120.5(5) |
| C(50)-C(51)-H(51) | 119.8    |
| C(52)-C(51)-H(51) | 119.8    |
| C(10)-C(9)-C(8)   | 119.6(5) |
| C(10)-C(9)-H(9)   | 120.2    |
| C(8)-C(9)-H(9)    | 120.2    |
| C(10)-C(11)-C(12) | 120.7(5) |
| C(10)-C(11)-H(11) | 119.7    |
| C(12)-C(11)-H(11) | 119.7    |
| C(50)-C(49)-C(48) | 120.0(6) |

|                   |          |
|-------------------|----------|
| C(50)-C(49)-H(49) | 120.0    |
| C(48)-C(49)-H(49) | 120.0    |
| C(13)-C(14)-C(15) | 120.0    |
| C(13)-C(14)-H(14) | 120.0    |
| C(15)-C(14)-H(14) | 120.0    |
| C(14)-C(13)-C(18) | 120.0    |
| C(14)-C(13)-C(6)  | 117.9(2) |
| C(18)-C(13)-C(6)  | 122.0(2) |
| C(17)-C(18)-C(13) | 120.0    |
| C(17)-C(18)-H(18) | 120.0    |
| C(13)-C(18)-H(18) | 120.0    |
| C(18)-C(17)-C(16) | 120.0    |
| C(18)-C(17)-H(17) | 120.0    |
| C(16)-C(17)-H(17) | 120.0    |
| C(15)-C(16)-C(17) | 120.0    |
| C(15)-C(16)-H(16) | 120.0    |
| C(17)-C(16)-H(16) | 120.0    |
| C(16)-C(15)-C(14) | 120.0    |
| C(16)-C(15)-H(15) | 120.0    |
| C(14)-C(15)-H(15) | 120.0    |

---

Symmetry transformations used to generate equivalent atoms:

**Table S17.** Anisotropic displacement parameters ( $\text{\AA}^2 \times 10^3$ ) for **5**. The anisotropic displacement factor exponent takes the form:  $-2\pi^2 [h^2 a^{*2} U^{11} + \dots + 2 h k a^* b^* U^{12}]$ .

|        | U <sup>11</sup> | U <sup>22</sup> | U <sup>33</sup> | U <sup>23</sup> | U <sup>13</sup> | U <sup>12</sup> |
|--------|-----------------|-----------------|-----------------|-----------------|-----------------|-----------------|
| Rh(01) | 11(1)           | 16(1)           | 13(1)           | 0(1)            | 0(1)            | -1(1)           |
| Rh(02) | 13(1)           | 15(1)           | 13(1)           | 0(1)            | 0(1)            | 0(1)            |
| Cl(03) | 15(1)           | 24(1)           | 15(1)           | -2(1)           | 2(1)            | -7(1)           |
| P(3)   | 16(1)           | 14(1)           | 16(1)           | 1(1)            | -1(1)           | 1(1)            |
| P(2)   | 12(1)           | 21(1)           | 15(1)           | 2(1)            | -1(1)           | -1(1)           |
| P(1)   | 12(1)           | 23(1)           | 17(1)           | -4(1)           | 1(1)            | -2(1)           |
| P(4)   | 19(1)           | 17(1)           | 15(1)           | -1(1)           | 2(1)            | 0(1)            |
| C(22)  | 12(2)           | 31(2)           | 14(2)           | 1(1)            | 0(1)            | -1(2)           |
| C(29)  | 13(2)           | 34(2)           | 22(2)           | -2(2)           | -2(2)           | 5(2)            |
| C(47)  | 38(3)           | 12(2)           | 21(2)           | 4(1)            | 3(2)            | -3(2)           |
| C(40)  | 20(2)           | 16(2)           | 17(2)           | 2(1)            | 0(2)            | 1(2)            |
| C(38)  | 15(2)           | 18(2)           | 24(2)           | 2(1)            | 2(2)            | -1(2)           |
| C(43)  | 23(2)           | 22(2)           | 24(2)           | -2(2)           | 2(2)            | -1(2)           |
| C(56)  | 25(2)           | 19(2)           | 19(2)           | 1(1)            | 4(2)            | -3(2)           |
| C(63)  | 24(2)           | 14(2)           | 24(2)           | 3(1)            | 4(2)            | -6(2)           |
| C(23)  | 18(2)           | 18(2)           | 29(2)           | 9(1)            | -7(2)           | 3(2)            |
| C(6)   | 10(2)           | 39(2)           | 23(2)           | -6(2)           | 1(2)            | 0(2)            |
| C(37)  | 15(2)           | 17(2)           | 22(2)           | 1(1)            | -4(2)           | -1(2)           |
| C(44)  | 23(2)           | 19(2)           | 31(2)           | 4(2)            | 5(2)            | 7(2)            |
| C(34)  | 18(2)           | 29(2)           | 22(2)           | -2(2)           | 3(2)            | 7(2)            |
| C(41)  | 14(2)           | 18(2)           | 19(2)           | 2(1)            | 3(1)            | 1(2)            |
| C(39)  | 22(2)           | 18(2)           | 21(2)           | 2(1)            | -1(2)           | 0(2)            |
| C(60)  | 25(2)           | 32(2)           | 51(3)           | 10(2)           | 8(2)            | 11(2)           |
| C(57)  | 21(2)           | 28(2)           | 24(2)           | -1(2)           | 8(2)            | 5(2)            |
| C(19)  | 16(2)           | 24(2)           | 22(2)           | 8(1)            | -1(2)           | -3(2)           |
| C(35)  | 21(2)           | 12(2)           | 20(2)           | 0(1)            | -5(2)           | -2(2)           |
| C(36)  | 31(2)           | 12(2)           | 17(2)           | -1(1)           | 1(2)            | -1(2)           |
| C(21)  | 13(2)           | 39(2)           | 20(2)           | 5(2)            | 2(2)            | -4(2)           |
| C(53)  | 24(2)           | 25(2)           | 21(2)           | -2(2)           | 4(2)            | 1(2)            |
| C(24)  | 19(2)           | 24(2)           | 51(3)           | 10(2)           | -5(2)           | 1(2)            |
| C(30)  | 30(2)           | 43(2)           | 20(2)           | 0(2)            | 4(2)            | 7(2)            |

## S 116

|       |        |       |        |        |        |        |
|-------|--------|-------|--------|--------|--------|--------|
| C(3)  | 23(2)  | 29(2) | 24(2)  | -8(2)  | 4(2)   | -9(2)  |
| C(27) | 36(3)  | 27(2) | 37(2)  | 5(2)   | 1(2)   | 10(2)  |
| C(64) | 30(2)  | 16(2) | 23(2)  | 4(1)   | 3(2)   | -4(2)  |
| C(58) | 17(2)  | 28(2) | 40(2)  | -6(2)  | 1(2)   | 1(2)   |
| C(28) | 24(2)  | 17(2) | 34(2)  | 4(1)   | 1(2)   | 2(2)   |
| C(20) | 15(2)  | 29(2) | 23(2)  | 10(2)  | 0(2)   | -4(2)  |
| C(52) | 55(3)  | 23(2) | 25(2)  | 5(2)   | -5(2)  | -11(2) |
| C(42) | 16(2)  | 23(2) | 22(2)  | 2(1)   | -1(2)  | 4(2)   |
| C(33) | 30(3)  | 30(2) | 36(2)  | -4(2)  | -2(2)  | 8(2)   |
| C(4)  | 16(2)  | 36(2) | 30(2)  | 1(2)   | -1(2)  | -8(2)  |
| C(45) | 21(2)  | 25(2) | 34(2)  | 9(2)   | 2(2)   | 7(2)   |
| C(46) | 19(2)  | 22(2) | 30(2)  | 2(1)   | -5(2)  | -1(2)  |
| C(1)  | 11(2)  | 30(2) | 18(2)  | -4(1)  | 1(1)   | 1(2)   |
| C(5)  | 15(2)  | 53(3) | 33(2)  | 16(2)  | -2(2)  | -8(2)  |
| C(48) | 52(3)  | 21(2) | 31(2)  | 4(2)   | 11(2)  | 4(2)   |
| C(26) | 40(3)  | 26(2) | 44(2)  | -2(2)  | -12(2) | 13(2)  |
| C(7)  | 21(2)  | 22(2) | 47(2)  | -4(2)  | 13(2)  | -4(2)  |
| C(54) | 25(2)  | 34(2) | 25(2)  | 5(2)   | 8(2)   | 2(2)   |
| C(25) | 27(2)  | 21(2) | 64(3)  | 4(2)   | -15(3) | 4(2)   |
| C(61) | 43(3)  | 25(2) | 46(3)  | -3(2)  | 11(2)  | 5(2)   |
| C(59) | 19(2)  | 39(2) | 43(2)  | 3(2)   | -2(2)  | 7(2)   |
| C(55) | 26(2)  | 33(2) | 23(2)  | 7(2)   | 7(2)   | 0(2)   |
| C(8)  | 24(2)  | 23(2) | 43(2)  | 8(2)   | 9(2)   | -1(2)  |
| C(68) | 34(3)  | 21(2) | 25(2)  | 0(2)   | 6(2)   | 4(2)   |
| C(32) | 57(3)  | 38(3) | 36(2)  | -11(2) | -6(2)  | 20(3)  |
| C(65) | 29(2)  | 26(2) | 33(2)  | 6(2)   | -6(2)  | -6(2)  |
| C(2)  | 13(2)  | 35(2) | 16(2)  | 3(1)   | 1(1)   | 3(2)   |
| C(66) | 26(3)  | 28(2) | 54(3)  | 9(2)   | -2(2)  | 2(2)   |
| C(62) | 37(3)  | 28(2) | 31(2)  | -5(2)  | 5(2)   | 3(2)   |
| C(12) | 36(3)  | 33(3) | 85(4)  | -20(2) | 19(3)  | -5(2)  |
| C(31) | 55(3)  | 54(3) | 22(2)  | -11(2) | 1(2)   | 22(3)  |
| C(50) | 130(6) | 19(2) | 21(2)  | 1(2)   | 22(3)  | -2(3)  |
| C(67) | 35(3)  | 26(2) | 41(2)  | 1(2)   | 15(2)  | 3(2)   |
| C(10) | 29(3)  | 28(3) | 141(6) | 21(3)  | 23(3)  | 9(2)   |
| C(51) | 95(5)  | 22(2) | 27(2)  | 5(2)   | -7(3)  | -22(3) |

## S 117

|       |       |        |        |        |       |       |
|-------|-------|--------|--------|--------|-------|-------|
| C(9)  | 24(3) | 38(2)  | 72(3)  | 21(2)  | 10(2) | 4(2)  |
| C(11) | 43(4) | 24(2)  | 147(6) | -16(3) | 34(4) | 6(3)  |
| C(49) | 99(5) | 20(2)  | 38(2)  | 2(2)   | 30(3) | 13(3) |
| C(14) | 34(3) | 35(2)  | 88(4)  | 8(3)   | 24(3) | 8(2)  |
| C(13) | 10(2) | 29(2)  | 41(2)  | 5(2)   | 10(2) | 5(2)  |
| C(18) | 19(2) | 58(3)  | 27(2)  | 7(2)   | 5(2)  | 10(2) |
| C(17) | 31(3) | 118(4) | 36(2)  | 28(3)  | 17(2) | 36(3) |
| C(16) | 51(4) | 105(5) | 98(4)  | 73(4)  | 55(4) | 59(4) |
| C(15) | 55(4) | 44(3)  | 141(6) | 46(3)  | 57(4) | 22(3) |

---

**Table S18.** Hydrogen coordinates ( $\times 10^4$ ) and isotropic displacement parameters ( $\text{\AA}^2 \times 10^3$ ) for **5**.

|        | x     | y    | z    | U(eq) |
|--------|-------|------|------|-------|
| H(22)  | 5005  | 5791 | 7601 | 23    |
| H(40)  | 6323  | 4247 | 6288 | 21    |
| H(38A) | 3337  | 4976 | 6778 | 23    |
| H(38B) | 4791  | 5083 | 6884 | 23    |
| H(43)  | 4918  | 7242 | 6795 | 27    |
| H(56)  | 8473  | 6580 | 5110 | 25    |
| H(6)   | 11032 | 5826 | 7357 | 29    |
| H(37)  | 3595  | 5196 | 5841 | 22    |
| H(44)  | 3162  | 7647 | 6381 | 29    |
| H(34)  | 6205  | 6826 | 7530 | 28    |
| H(39A) | 3727  | 4150 | 6203 | 25    |
| H(39B) | 4589  | 4039 | 6728 | 25    |
| H(60)  | 11539 | 3530 | 5949 | 43    |
| H(19)  | 7129  | 4624 | 8310 | 25    |
| H(35A) | 4902  | 4847 | 4957 | 21    |
| H(35B) | 5011  | 5570 | 4988 | 21    |
| H(36A) | 6557  | 5352 | 4394 | 24    |
| H(36B) | 6900  | 4731 | 4698 | 24    |
| H(21A) | 3987  | 5314 | 8302 | 29    |
| H(21B) | 5193  | 5321 | 8687 | 29    |
| H(53)  | 9020  | 5021 | 4474 | 28    |
| H(24)  | 5917  | 3608 | 7754 | 38    |
| H(30)  | 4507  | 6235 | 8902 | 37    |
| H(3)   | 9986  | 7312 | 7975 | 30    |
| H(27)  | 9255  | 3986 | 6598 | 40    |
| H(64)  | 6888  | 6364 | 3852 | 27    |
| H(58)  | 10707 | 5298 | 5727 | 34    |
| H(28)  | 8633  | 4719 | 7230 | 30    |
| H(20A) | 4879  | 4618 | 7708 | 27    |
| H(20B) | 5131  | 4354 | 8310 | 27    |
| H(52)  | 3869  | 3839 | 5368 | 41    |

|        |       |      |      |    |
|--------|-------|------|------|----|
| H(42)  | 5437  | 6226 | 6667 | 24 |
| H(33)  | 6241  | 7807 | 7882 | 39 |
| H(4A)  | 10756 | 6978 | 6896 | 33 |
| H(4B)  | 11356 | 7514 | 7253 | 33 |
| H(45)  | 1919  | 7042 | 5832 | 32 |
| H(46)  | 2416  | 6018 | 5709 | 28 |
| H(1A)  | 9355  | 6336 | 8649 | 23 |
| H(1B)  | 8126  | 6678 | 8451 | 23 |
| H(5A)  | 12045 | 6833 | 7915 | 41 |
| H(5B)  | 12459 | 6550 | 7339 | 41 |
| H(48)  | 7555  | 3767 | 5642 | 42 |
| H(26)  | 8233  | 3051 | 6565 | 44 |
| H(54A) | 10480 | 5965 | 4958 | 34 |
| H(54B) | 10688 | 5666 | 4365 | 34 |
| H(25)  | 6599  | 2863 | 7150 | 45 |
| H(61)  | 10371 | 3288 | 5186 | 45 |
| H(59)  | 11676 | 4537 | 6229 | 40 |
| H(55A) | 8778  | 6058 | 4052 | 33 |
| H(55B) | 9538  | 6614 | 4310 | 33 |
| H(8)   | 8170  | 7118 | 6747 | 36 |
| H(68)  | 6499  | 6910 | 5424 | 32 |
| H(32)  | 5436  | 7998 | 8749 | 52 |
| H(65)  | 4980  | 6797 | 3640 | 35 |
| H(2A)  | 7330  | 5795 | 8758 | 25 |
| H(2B)  | 8497  | 5410 | 8553 | 25 |
| H(66)  | 3826  | 7278 | 4315 | 43 |
| H(62)  | 9360  | 4036 | 4694 | 39 |
| H(12)  | 9169  | 8262 | 7954 | 62 |
| H(31)  | 4537  | 7220 | 9244 | 52 |
| H(50)  | 6045  | 2763 | 4437 | 68 |
| H(67)  | 4580  | 7324 | 5211 | 41 |
| H(10)  | 6682  | 8797 | 6832 | 79 |
| H(51)  | 4103  | 3129 | 4662 | 57 |
| H(9)   | 6815  | 7851 | 6404 | 54 |
| H(11)  | 7872  | 8994 | 7600 | 86 |



|       |          |          |          |        |
|-------|----------|----------|----------|--------|
| H(49) | 7767     | 3080     | 4919     | 63     |
| H(14) | 10714    | 4922     | 7834     | 63     |
| H(18) | 11916    | 6391     | 8670     | 41     |
| H(17) | 12356    | 5779     | 9425     | 74     |
| H(16) | 11975    | 4738     | 9385     | 101    |
| H(15) | 11154    | 4309     | 8589     | 96     |
| H(1)  | 7110(50) | 5460(20) | 6722(19) | 56(15) |

---

### 6.3 [(Ph-BPE)Rh( $\mu$ -H)]<sub>2</sub> (6)

Table S19. Sample and crystal data for 6.

|                               |                                                                |                     |  |
|-------------------------------|----------------------------------------------------------------|---------------------|--|
| <b>Identification code</b>    | <b>6</b>                                                       |                     |  |
| <b>Chemical formula</b>       | C <sub>68</sub> H <sub>72</sub> P <sub>4</sub> Rh <sub>2</sub> |                     |  |
| <b>Formula weight</b>         | 1218.95 g/mol                                                  |                     |  |
| <b>Temperature</b>            | 100(2) K                                                       |                     |  |
| <b>Wavelength</b>             | 0.71073 Å                                                      |                     |  |
| <b>Crystal size</b>           | 0.064 x 0.196 x 0.201 mm                                       |                     |  |
| <b>Crystal habit</b>          | clear red plate                                                |                     |  |
| <b>Crystal system</b>         | orthorhombic                                                   |                     |  |
| <b>Space group</b>            | P 21 21 21                                                     |                     |  |
| <b>Unit cell dimensions</b>   | a = 13.1998(4) Å                                               | $\alpha = 90^\circ$ |  |
|                               | b = 18.0969(5) Å                                               | $\beta = 90^\circ$  |  |
|                               | c = 24.5076(8) Å                                               | $\gamma = 90^\circ$ |  |
| <b>Volume</b>                 | 5854.3(3) Å <sup>3</sup>                                       |                     |  |
| <b>Z</b>                      | 4                                                              |                     |  |
| <b>Density (calculated)</b>   | 1.383 g/cm <sup>3</sup>                                        |                     |  |
| <b>Absorption coefficient</b> | 0.714 mm <sup>-1</sup>                                         |                     |  |
| <b>F(000)</b>                 | 2520                                                           |                     |  |

**Table S20.** Data collection and structure refinement for **6**.

|                                            |                                                                                                                 |                           |
|--------------------------------------------|-----------------------------------------------------------------------------------------------------------------|---------------------------|
| <b>Theta range for data collection</b>     | 1.40 to 26.38°                                                                                                  |                           |
| <b>Index ranges</b>                        | -16<=h<=16, -22<=k<=20, -30<=l<=15                                                                              |                           |
| <b>Reflections collected</b>               | 27044                                                                                                           |                           |
| <b>Independent reflections</b>             | 11938 [R(int) = 0.0670]                                                                                         |                           |
| <b>Coverage of independent reflections</b> | 99.8%                                                                                                           |                           |
| <b>Max. and min. transmission</b>          | 0.9560 and 0.8700                                                                                               |                           |
| <b>Refinement method</b>                   | Full-matrix least-squares on F <sup>2</sup>                                                                     |                           |
| <b>Refinement program</b>                  | SHELXL-2014/7 (Sheldrick, 2014)                                                                                 |                           |
| <b>Function minimized</b>                  | $\Sigma w(F_o^2 - F_c^2)^2$                                                                                     |                           |
| <b>Data / restraints / parameters</b>      | 11938 / 0 / 667                                                                                                 |                           |
| <b>Goodness-of-fit on F<sup>2</sup></b>    | 0.701                                                                                                           |                           |
| $\Delta/\sigma_{\max}$                     | 0.001                                                                                                           |                           |
| <b>Final R indices</b>                     | 7779 data; I>2 $\sigma$ (I)                                                                                     | R1 = 0.0427, wR2 = 0.0776 |
|                                            | all data                                                                                                        | R1 = 0.0841, wR2 = 0.0912 |
| <b>Weighting scheme</b>                    | w=1/[ $\sigma^2(F_o^2)+(0.0483P)^2$ ]<br>where P=(F <sub>o</sub> <sup>2</sup> +2F <sub>c</sub> <sup>2</sup> )/3 |                           |
| <b>Absolute structure parameter</b>        | -0.0(0)                                                                                                         |                           |
| <b>Largest diff. peak and hole</b>         | 0.973 and -0.572 eÅ <sup>-3</sup>                                                                               |                           |
| <b>R.M.S. deviation from mean</b>          | 0.095 eÅ <sup>-3</sup>                                                                                          |                           |

**Table S21.** Atomic coordinates and equivalent isotropic atomic displacement parameters ( $\text{\AA}^2$ ) for **6**

$U(\text{eq})$  is defined as one third of the trace of the orthogonalized  $U_{ij}$  tensor.

|         | <b>x/a</b>  | <b>y/b</b>  | <b>z/c</b> | <b>U(eq)</b> |
|---------|-------------|-------------|------------|--------------|
| Rh<br>1 | 0.16657(5)  | 0.03758(3)  | 0.10878(2) | 0.01478(4)   |
| Rh<br>2 | 0.16916(5)  | 0.08124(3)  | 0.21090(2) | 0.01417(4)   |
| P1      | 0.20034(15) | 0.08865(10) | 0.03039(8) | 0.0157(5)    |
| P2      | 0.16420(18) | 0.93463(9)  | 0.06377(7) | 0.0138(4)    |
| P3      | 0.16118(18) | 0.18599(9)  | 0.25414(7) | 0.0153(4)    |
| P4      | 0.18005(16) | 0.03221(9)  | 0.29213(7) | 0.0161(4)    |
| C1      | 0.1145(6)   | 0.1651(4)   | 0.0073(3)  | 0.0218(19)   |
| C2      | 0.1841(7)   | 0.2302(4)   | 0.9904(3)  | 0.031(2)     |
| C3      | 0.2775(6)   | 0.2265(4)   | 0.0281(3)  | 0.025(2)     |
| C4      | 0.3164(6)   | 0.1461(4)   | 0.0219(3)  | 0.0204(18)   |
| C5      | 0.4066(6)   | 0.1275(4)   | 0.0574(3)  | 0.0181(18)   |
| C6      | 0.3979(6)   | 0.1221(4)   | 0.1137(3)  | 0.0220(18)   |
| C7      | 0.4811(7)   | 0.1033(4)   | 0.1451(3)  | 0.029(2)     |
| C8      | 0.5745(6)   | 0.0904(4)   | 0.1211(4)  | 0.027(2)     |
| C9      | 0.5836(6)   | 0.0965(4)   | 0.0653(4)  | 0.028(2)     |
| C1<br>0 | 0.5001(6)   | 0.1136(4)   | 0.0335(3)  | 0.0218(19)   |
| C1<br>1 | 0.0320(6)   | 0.1435(4)   | 0.9681(3)  | 0.0202(18)   |
| C1<br>2 | 0.9625(6)   | 0.0898(4)   | 0.9837(3)  | 0.0226(19)   |
| C1<br>3 | 0.8848(6)   | 0.0685(4)   | 0.9487(3)  | 0.028(2)     |
| C1<br>4 | 0.8747(6)   | 0.1018(4)   | 0.8978(3)  | 0.030(2)     |
| C1<br>5 | 0.9433(7)   | 0.1551(4)   | 0.8825(3)  | 0.029(2)     |
| C1<br>6 | 0.0209(6)   | 0.1758(4)   | 0.9174(3)  | 0.0227(19)   |
| C1<br>7 | 0.2145(6)   | 0.0205(4)   | 0.9744(3)  | 0.0204(18)   |
| C1      | 0.1614(7)   | 0.9478(3)   | 0.9896(3)  | 0.0181(16)   |

|         | <b>x/a</b> | <b>y/b</b> | <b>z/c</b> | <b>U(eq)</b> |
|---------|------------|------------|------------|--------------|
| 8       |            |            |            |              |
| C1<br>9 | 0.2681(6)  | 0.8681(4)  | 0.0840(3)  | 0.0170(18)   |
| C2<br>0 | 0.2149(6)  | 0.7965(4)  | 0.1032(3)  | 0.024(2)     |
| C2<br>1 | 0.1063(6)  | 0.8174(4)  | 0.1205(3)  | 0.0210(19)   |
| C2<br>2 | 0.0638(6)  | 0.8641(4)  | 0.0746(3)  | 0.0165(18)   |
| C2<br>3 | 0.9580(6)  | 0.8947(4)  | 0.0814(3)  | 0.0173(18)   |
| C2<br>4 | 0.9294(6)  | 0.9334(4)  | 0.1281(3)  | 0.025(2)     |
| C2<br>5 | 0.8305(8)  | 0.9593(4)  | 0.1328(3)  | 0.0333(19)   |
| C2<br>6 | 0.7603(7)  | 0.9487(4)  | 0.0921(4)  | 0.031(2)     |
| C2<br>7 | 0.7901(7)  | 0.9108(4)  | 0.0456(4)  | 0.028(2)     |
| C2<br>8 | 0.8873(7)  | 0.8846(4)  | 0.0398(4)  | 0.023(2)     |
| C2<br>9 | 0.3515(5)  | 0.8623(4)  | 0.0435(3)  | 0.0145(17)   |
| C3<br>0 | 0.4290(6)  | 0.9144(4)  | 0.0433(3)  | 0.0186(18)   |
| C3<br>1 | 0.5064(6)  | 0.9122(4)  | 0.0056(3)  | 0.0229(18)   |
| C3<br>2 | 0.5091(6)  | 0.8572(4)  | 0.9663(3)  | 0.0234(19)   |
| C3<br>3 | 0.4328(6)  | 0.8056(4)  | 0.9649(3)  | 0.0217(19)   |
| C3<br>4 | 0.3548(6)  | 0.8082(4)  | 0.0027(3)  | 0.0183(18)   |
| C3<br>5 | 0.0753(6)  | 0.2626(4)  | 0.2318(3)  | 0.0194(19)   |
| C4<br>6 | 0.9875(7)  | 0.2239(5)  | 0.1447(4)  | 0.038(2)     |
| C3<br>6 | 0.1468(6)  | 0.3177(4)  | 0.2044(3)  | 0.028(2)     |
| C3<br>7 | 0.2368(6)  | 0.3256(4)  | 0.2418(3)  | 0.023(2)     |
| C3      | 0.2761(6)  | 0.2477(4)  | 0.2545(3)  | 0.0183(18)   |

|         | <b>x/a</b> | <b>y/b</b> | <b>z/c</b> | <b>U(eq)</b> |
|---------|------------|------------|------------|--------------|
| 8       |            |            |            |              |
| C3<br>9 | 0.3430(7)  | 0.2390(4)  | 0.3029(3)  | 0.0225(18)   |
| C4<br>0 | 0.4272(7)  | 0.1929(5)  | 0.3004(4)  | 0.039(2)     |
| C4<br>4 | 0.3282(8)  | 0.2750(4)  | 0.3524(3)  | 0.0296(19)   |
| C5<br>1 | 0.1225(6)  | 0.1714(4)  | 0.3255(3)  | 0.0177(18)   |
| C5<br>2 | 0.1748(7)  | 0.1025(3)  | 0.3475(3)  | 0.0202(17)   |
| C5<br>3 | 0.0813(6)  | 0.9633(4)  | 0.3118(3)  | 0.0208(18)   |
| C6<br>3 | 0.9799(6)  | 0.9964(4)  | 0.3252(3)  | 0.023(2)     |
| C6<br>8 | 0.9251(6)  | 0.0329(4)  | 0.2847(4)  | 0.031(2)     |
| C6<br>7 | 0.8309(8)  | 0.0623(4)  | 0.2956(4)  | 0.044(2)     |
| C6<br>6 | 0.7907(7)  | 0.0575(5)  | 0.3470(4)  | 0.049(3)     |
| C6<br>5 | 0.8429(7)  | 0.0222(5)  | 0.3875(4)  | 0.045(2)     |
| C6<br>4 | 0.9379(7)  | 0.9922(5)  | 0.3767(3)  | 0.032(2)     |
| C5<br>4 | 0.1325(6)  | 0.9152(4)  | 0.3548(3)  | 0.026(2)     |
| C5<br>5 | 0.2383(6)  | 0.8982(4)  | 0.3336(3)  | 0.026(2)     |
| C5<br>6 | 0.2872(6)  | 0.9718(4)  | 0.3162(3)  | 0.0225(19)   |
| C5<br>7 | 0.3771(6)  | 0.9623(4)  | 0.2791(3)  | 0.0220(18)   |
| C6<br>2 | 0.4702(6)  | 0.9896(4)  | 0.2932(4)  | 0.028(2)     |
| C6<br>1 | 0.5555(7)  | 0.9769(4)  | 0.2612(4)  | 0.032(2)     |
| C6<br>0 | 0.5476(7)  | 0.9367(4)  | 0.2138(4)  | 0.032(2)     |
| C5<br>9 | 0.4548(7)  | 0.9081(5)  | 0.1993(3)  | 0.039(2)     |
| C5      | 0.3700(7)  | 0.9218(5)  | 0.2308(3)  | 0.035(2)     |

|         | x/a       | y/b       | z/c       | U(eq)    |
|---------|-----------|-----------|-----------|----------|
| 8       |           |           |           |          |
| C4<br>1 | 0.4912(8) | 0.1827(6) | 0.3450(5) | 0.061(3) |
| C4<br>5 | 0.9827(6) | 0.2398(4) | 0.2003(3) | 0.026(2) |
| C5<br>0 | 0.8901(7) | 0.2334(4) | 0.2267(4) | 0.032(2) |
| C4<br>3 | 0.3909(8) | 0.2657(4) | 0.3967(4) | 0.040(2) |
| C4<br>2 | 0.4716(9) | 0.2194(5) | 0.3928(5) | 0.056(3) |
| C4<br>7 | 0.9009(8) | 0.2029(5) | 0.1168(4) | 0.047(3) |
| C4<br>8 | 0.8096(8) | 0.1972(5) | 0.1428(4) | 0.044(3) |
| C4<br>9 | 0.8034(7) | 0.2120(4) | 0.1982(4) | 0.043(3) |

**Table S22.** Bond lengths (Å) for **6**.

|         |            |         |            |
|---------|------------|---------|------------|
| Rh1-P2  | 2.1654(17) | Rh1-P1  | 2.178(2)   |
| Rh1-Rh2 | 2.6246(7)  | Rh2-P3  | 2.1743(18) |
| Rh2-P4  | 2.1842(18) | P1-C17  | 1.854(7)   |
| P1-C4   | 1.863(7)   | P1-C1   | 1.876(8)   |
| P2-C18  | 1.833(6)   | P2-C22  | 1.859(8)   |
| P2-C19  | 1.891(8)   | P3-C51  | 1.842(7)   |
| P3-C35  | 1.874(7)   | P3-C38  | 1.884(8)   |
| P4-C52  | 1.862(7)   | P4-C53  | 1.867(8)   |
| P4-C56  | 1.882(8)   | C1-C11  | 1.504(10)  |
| C1-C2   | 1.550(10)  | C1-H1   | 1.0        |
| C2-C3   | 1.542(11)  | C2-H2A  | 0.99       |
| C2-H2B  | 0.99       | C3-C4   | 1.550(10)  |
| C3-H3A  | 0.99       | C3-H3B  | 0.99       |
| C4-C5   | 1.513(10)  | C4-H4   | 1.0        |
| C5-C6   | 1.386(10)  | C5-C10  | 1.390(11)  |
| C6-C7   | 1.384(10)  | C6-H6   | 0.95       |
| C7-C8   | 1.386(11)  | C7-H7   | 0.95       |
| C8-C9   | 1.377(11)  | C8-H8   | 0.95       |
| C9-C10  | 1.386(11)  | C9-H9   | 0.95       |
| C10-H10 | 0.95       | C11-C16 | 1.383(10)  |
| C11-C12 | 1.390(10)  | C12-C13 | 1.391(10)  |

|          |           |          |           |
|----------|-----------|----------|-----------|
| C12-H12  | 0.95      | C13-C14  | 1.391(11) |
| C13-H13  | 0.95      | C14-C15  | 1.375(11) |
| C14-H14  | 0.95      | C15-C16  | 1.385(11) |
| C15-H15  | 0.95      | C16-H16  | 0.95      |
| C17-C18  | 1.537(9)  | C17-H17A | 0.99      |
| C17-H17B | 0.99      | C18-H18A | 0.99      |
| C18-H18B | 0.99      | C19-C29  | 1.485(10) |
| C19-C20  | 1.548(10) | C19-H19  | 1.0       |
| C20-C21  | 1.542(10) | C20-H20A | 0.99      |
| C20-H20B | 0.99      | C21-C22  | 1.515(10) |
| C21-H21A | 0.99      | C21-H21B | 0.99      |
| C22-C23  | 1.511(10) | C22-H22  | 1.0       |
| C23-C24  | 1.394(10) | C23-C28  | 1.395(11) |
| C24-C25  | 1.391(12) | C24-H24  | 0.95      |
| C25-C26  | 1.376(12) | C25-H25  | 0.95      |
| C26-C27  | 1.387(11) | C26-H26  | 0.95      |
| C27-C28  | 1.374(11) | C27-H27  | 0.95      |
| C28-H28  | 0.95      | C29-C30  | 1.392(10) |
| C29-C34  | 1.400(9)  | C30-C31  | 1.379(10) |
| C30-H30  | 0.95      | C31-C32  | 1.386(10) |
| C31-H31  | 0.95      | C32-C33  | 1.373(11) |
| C32-H32  | 0.95      | C33-C34  | 1.384(10) |
| C33-H33  | 0.95      | C34-H34  | 0.95      |
| C35-C45  | 1.503(10) | C35-C36  | 1.528(10) |
| C35-H35  | 1.0       | C46-C47  | 1.386(12) |
| C46-C45  | 1.393(11) | C46-H46  | 0.95      |
| C36-C37  | 1.509(11) | C36-H36A | 0.99      |
| C36-H36B | 0.99      | C37-C38  | 1.534(10) |
| C37-H37A | 0.99      | C37-H37B | 0.99      |
| C38-C39  | 1.487(10) | C38-H38  | 1.0       |
| C39-C40  | 1.391(11) | C39-C44  | 1.391(10) |
| C40-C41  | 1.394(13) | C40-H40  | 0.95      |
| C44-C43  | 1.377(11) | C44-H44  | 0.95      |
| C51-C52  | 1.523(9)  | C51-H51A | 0.99      |
| C51-H51B | 0.99      | C52-H52A | 0.99      |
| C52-H52B | 0.99      | C53-C63  | 1.502(11) |
| C53-C54  | 1.524(10) | C53-H53  | 1.0       |
| C63-C64  | 1.382(11) | C63-C68  | 1.393(11) |
| C68-C67  | 1.379(12) | C68-H68  | 0.95      |
| C67-C66  | 1.370(12) | C67-H67  | 0.95      |
| C66-C65  | 1.367(13) | C66-H66  | 0.95      |

|          |           |          |           |
|----------|-----------|----------|-----------|
| C65-C64  | 1.392(12) | C65-H65  | 0.95      |
| C64-H64  | 0.95      | C54-C55  | 1.522(11) |
| C54-H54A | 0.99      | C54-H54B | 0.99      |
| C55-C56  | 1.542(10) | C55-H55A | 0.99      |
| C55-H55B | 0.99      | C56-C57  | 1.505(11) |
| C56-H56  | 1.0       | C57-C62  | 1.370(11) |
| C57-C58  | 1.394(10) | C62-C61  | 1.392(11) |
| C62-H62  | 0.95      | C61-C60  | 1.375(11) |
| C61-H61  | 0.95      | C60-C59  | 1.377(12) |
| C60-H60  | 0.95      | C59-C58  | 1.382(11) |
| C59-H59  | 0.95      | C58-H58  | 0.95      |
| C41-C42  | 1.371(15) | C41-H41  | 0.95      |
| C45-C50  | 1.388(12) | C50-C49  | 1.396(11) |
| C50-H50  | 0.95      | C43-C42  | 1.359(13) |
| C43-H43  | 0.95      | C42-H42  | 0.95      |
| C47-C48  | 1.369(14) | C47-H47  | 0.95      |
| C48-C49  | 1.385(13) | C48-H48  | 0.95      |
| C49-H49  | 0.95      |          |           |

**Table S23.** Bond angles (°) for **6**.

|            |           |            |           |
|------------|-----------|------------|-----------|
| P2-Rh1-P1  | 85.34(7)  | P2-Rh1-Rh2 | 138.15(5) |
| P1-Rh1-Rh2 | 135.30(6) | P3-Rh2-P4  | 85.02(7)  |
| P3-Rh2-Rh1 | 136.59(5) | P4-Rh2-Rh1 | 138.39(5) |
| C17-P1-C4  | 101.9(3)  | C17-P1-C1  | 109.1(4)  |
| C4-P1-C1   | 92.9(3)   | C17-P1-Rh1 | 113.1(2)  |
| C4-P1-Rh1  | 120.2(2)  | C1-P1-Rh1  | 117.1(3)  |
| C18-P2-C22 | 102.5(4)  | C18-P2-C19 | 110.9(4)  |
| C22-P2-C19 | 92.5(3)   | C18-P2-Rh1 | 113.2(2)  |
| C22-P2-Rh1 | 121.9(3)  | C19-P2-Rh1 | 113.8(2)  |
| C51-P3-C35 | 102.5(4)  | C51-P3-C38 | 107.7(3)  |
| C35-P3-C38 | 92.9(3)   | C51-P3-Rh2 | 110.6(2)  |
| C35-P3-Rh2 | 122.1(2)  | C38-P3-Rh2 | 118.7(3)  |
| C52-P4-C53 | 104.0(3)  | C52-P4-C56 | 101.3(4)  |
| C53-P4-C56 | 93.2(3)   | C52-P4-Rh2 | 112.6(2)  |
| C53-P4-Rh2 | 117.5(2)  | C56-P4-Rh2 | 124.8(3)  |
| C11-C1-C2  | 117.1(6)  | C11-C1-P1  | 115.9(5)  |
| C2-C1-P1   | 106.4(5)  | C11-C1-H1  | 105.4     |
| C2-C1-H1   | 105.4     | P1-C1-H1   | 105.4     |
| C3-C2-C1   | 106.3(6)  | C3-C2-H2A  | 110.5     |
| C1-C2-H2A  | 110.5     | C3-C2-H2B  | 110.5     |



|              |          |               |          |
|--------------|----------|---------------|----------|
| C1-C2-H2B    | 110.5    | H2A-C2-H2B    | 108.7    |
| C2-C3-C4     | 104.3(6) | C2-C3-H3A     | 110.9    |
| C4-C3-H3A    | 110.9    | C2-C3-H3B     | 110.9    |
| C4-C3-H3B    | 110.9    | H3A-C3-H3B    | 108.9    |
| C5-C4-C3     | 114.4(6) | C5-C4-P1      | 117.3(5) |
| C3-C4-P1     | 103.9(5) | C5-C4-H4      | 106.8    |
| C3-C4-H4     | 106.8    | P1-C4-H4      | 106.8    |
| C6-C5-C10    | 118.7(7) | C6-C5-C4      | 121.6(7) |
| C10-C5-C4    | 119.7(7) | C7-C6-C5      | 120.4(8) |
| C7-C6-H6     | 119.8    | C5-C6-H6      | 119.8    |
| C6-C7-C8     | 120.7(8) | C6-C7-H7      | 119.7    |
| C8-C7-H7     | 119.7    | C9-C8-C7      | 119.1(8) |
| C9-C8-H8     | 120.4    | C7-C8-H8      | 120.4    |
| C8-C9-C10    | 120.5(8) | C8-C9-H9      | 119.8    |
| C10-C9-H9    | 119.8    | C9-C10-C5     | 120.6(8) |
| C9-C10-H10   | 119.7    | C5-C10-H10    | 119.7    |
| C16-C11-C12  | 118.1(7) | C16-C11-C1    | 122.8(7) |
| C12-C11-C1   | 119.1(7) | C11-C12-C13   | 120.8(7) |
| C11-C12-H12  | 119.6    | C13-C12-H12   | 119.6    |
| C12-C13-C14  | 120.2(8) | C12-C13-H13   | 119.9    |
| C14-C13-H13  | 119.9    | C15-C14-C13   | 119.0(8) |
| C15-C14-H14  | 120.5    | C13-C14-H14   | 120.5    |
| C14-C15-C16  | 120.6(7) | C14-C15-H15   | 119.7    |
| C16-C15-H15  | 119.7    | C11-C16-C15   | 121.3(8) |
| C11-C16-H16  | 119.4    | C15-C16-H16   | 119.4    |
| C18-C17-P1   | 110.1(5) | C18-C17-H17A  | 109.6    |
| P1-C17-H17A  | 109.6    | C18-C17-H17B  | 109.6    |
| P1-C17-H17B  | 109.6    | H17A-C17-H17B | 108.2    |
| C17-C18-P2   | 110.1(5) | C17-C18-H18A  | 109.6    |
| P2-C18-H18A  | 109.6    | C17-C18-H18B  | 109.6    |
| P2-C18-H18B  | 109.6    | H18A-C18-H18B | 108.2    |
| C29-C19-C20  | 118.7(6) | C29-C19-P2    | 114.1(5) |
| C20-C19-P2   | 106.5(5) | C29-C19-H19   | 105.5    |
| C20-C19-H19  | 105.5    | P2-C19-H19    | 105.5    |
| C21-C20-C19  | 107.5(6) | C21-C20-H20A  | 110.2    |
| C19-C20-H20A | 110.2    | C21-C20-H20B  | 110.2    |
| C19-C20-H20B | 110.2    | H20A-C20-H20B | 108.5    |
| C22-C21-C20  | 106.1(7) | C22-C21-H21A  | 110.5    |
| C20-C21-H21A | 110.5    | C22-C21-H21B  | 110.5    |
| C20-C21-H21B | 110.5    | H21A-C21-H21B | 108.7    |
| C23-C22-C21  | 117.6(7) | C23-C22-P2    | 115.1(5) |

|               |          |               |          |
|---------------|----------|---------------|----------|
| C21-C22-P2    | 103.0(5) | C23-C22-H22   | 106.8    |
| C21-C22-H22   | 106.8    | P2-C22-H22    | 106.8    |
| C24-C23-C28   | 119.0(7) | C24-C23-C22   | 121.7(7) |
| C28-C23-C22   | 119.3(7) | C25-C24-C23   | 119.4(8) |
| C25-C24-H24   | 120.3    | C23-C24-H24   | 120.3    |
| C26-C25-C24   | 121.7(8) | C26-C25-H25   | 119.1    |
| C24-C25-H25   | 119.1    | C25-C26-C27   | 118.3(8) |
| C25-C26-H26   | 120.9    | C27-C26-H26   | 120.9    |
| C28-C27-C26   | 121.3(8) | C28-C27-H27   | 119.3    |
| C26-C27-H27   | 119.3    | C27-C28-C23   | 120.3(8) |
| C27-C28-H28   | 119.9    | C23-C28-H28   | 119.9    |
| C30-C29-C34   | 116.7(7) | C30-C29-C19   | 119.9(6) |
| C34-C29-C19   | 123.4(7) | C31-C30-C29   | 121.8(7) |
| C31-C30-H30   | 119.1    | C29-C30-H30   | 119.1    |
| C30-C31-C32   | 120.4(8) | C30-C31-H31   | 119.8    |
| C32-C31-H31   | 119.8    | C33-C32-C31   | 119.1(8) |
| C33-C32-H32   | 120.4    | C31-C32-H32   | 120.4    |
| C32-C33-C34   | 120.4(7) | C32-C33-H33   | 119.8    |
| C34-C33-H33   | 119.8    | C33-C34-C29   | 121.6(7) |
| C33-C34-H34   | 119.2    | C29-C34-H34   | 119.2    |
| C45-C35-C36   | 117.1(7) | C45-C35-P3    | 116.0(5) |
| C36-C35-P3    | 103.7(5) | C45-C35-H35   | 106.4    |
| C36-C35-H35   | 106.4    | P3-C35-H35    | 106.4    |
| C47-C46-C45   | 120.2(9) | C47-C46-H46   | 119.9    |
| C45-C46-H46   | 119.9    | C37-C36-C35   | 106.3(6) |
| C37-C36-H36A  | 110.5    | C35-C36-H36A  | 110.5    |
| C37-C36-H36B  | 110.5    | C35-C36-H36B  | 110.5    |
| H36A-C36-H36B | 108.7    | C36-C37-C38   | 107.6(6) |
| C36-C37-H37A  | 110.2    | C38-C37-H37A  | 110.2    |
| C36-C37-H37B  | 110.2    | C38-C37-H37B  | 110.2    |
| H37A-C37-H37B | 108.5    | C39-C38-C37   | 117.4(6) |
| C39-C38-P3    | 114.8(5) | C37-C38-P3    | 105.7(5) |
| C39-C38-H38   | 106.0    | C37-C38-H38   | 106.0    |
| P3-C38-H38    | 106.0    | C40-C39-C44   | 115.6(8) |
| C40-C39-C38   | 120.2(7) | C44-C39-C38   | 124.2(8) |
| C39-C40-C41   | 122.0(9) | C39-C40-H40   | 119.0    |
| C41-C40-H40   | 119.0    | C43-C44-C39   | 123.2(9) |
| C43-C44-H44   | 118.4    | C39-C44-H44   | 118.4    |
| C52-C51-P3    | 109.1(5) | C52-C51-H51A  | 109.9    |
| P3-C51-H51A   | 109.9    | C52-C51-H51B  | 109.9    |
| P3-C51-H51B   | 109.9    | H51A-C51-H51B | 108.3    |

|              |           |               |          |
|--------------|-----------|---------------|----------|
| C51-C52-P4   | 108.6(5)  | C51-C52-H52A  | 110.0    |
| P4-C52-H52A  | 110.0     | C51-C52-H52B  | 110.0    |
| P4-C52-H52B  | 110.0     | H52A-C52-H52B | 108.4    |
| C63-C53-C54  | 118.2(7)  | C63-C53-P4    | 114.3(5) |
| C54-C53-P4   | 104.5(5)  | C63-C53-H53   | 106.3    |
| C54-C53-H53  | 106.3     | P4-C53-H53    | 106.3    |
| C64-C63-C68  | 117.9(8)  | C64-C63-C53   | 122.3(8) |
| C68-C63-C53  | 119.8(7)  | C67-C68-C63   | 120.9(8) |
| C67-C68-H68  | 119.5     | C63-C68-H68   | 119.5    |
| C66-C67-C68  | 120.2(9)  | C66-C67-H67   | 119.9    |
| C68-C67-H67  | 119.9     | C65-C66-C67   | 120.1(9) |
| C65-C66-H66  | 119.9     | C67-C66-H66   | 119.9    |
| C66-C65-C64  | 120.0(9)  | C66-C65-H65   | 120.0    |
| C64-C65-H65  | 120.0     | C63-C64-C65   | 120.9(9) |
| C63-C64-H64  | 119.6     | C65-C64-H64   | 119.6    |
| C55-C54-C53  | 106.6(6)  | C55-C54-H54A  | 110.4    |
| C53-C54-H54A | 110.4     | C55-C54-H54B  | 110.4    |
| C53-C54-H54B | 110.4     | H54A-C54-H54B | 108.6    |
| C54-C55-C56  | 107.7(6)  | C54-C55-H55A  | 110.2    |
| C56-C55-H55A | 110.2     | C54-C55-H55B  | 110.2    |
| C56-C55-H55B | 110.2     | H55A-C55-H55B | 108.5    |
| C57-C56-C55  | 113.4(6)  | C57-C56-P4    | 118.0(5) |
| C55-C56-P4   | 105.9(5)  | C57-C56-H56   | 106.2    |
| C55-C56-H56  | 106.2     | P4-C56-H56    | 106.2    |
| C62-C57-C58  | 117.7(8)  | C62-C57-C56   | 120.8(7) |
| C58-C57-C56  | 121.4(7)  | C57-C62-C61   | 121.5(8) |
| C57-C62-H62  | 119.2     | C61-C62-H62   | 119.2    |
| C60-C61-C62  | 120.2(8)  | C60-C61-H61   | 119.9    |
| C62-C61-H61  | 119.9     | C61-C60-C59   | 119.0(9) |
| C61-C60-H60  | 120.5     | C59-C60-H60   | 120.5    |
| C60-C59-C58  | 120.6(8)  | C60-C59-H59   | 119.7    |
| C58-C59-H59  | 119.7     | C59-C58-C57   | 121.0(8) |
| C59-C58-H58  | 119.5     | C57-C58-H58   | 119.5    |
| C42-C41-C40  | 119.4(10) | C42-C41-H41   | 120.3    |
| C40-C41-H41  | 120.3     | C50-C45-C46   | 118.7(8) |
| C50-C45-C35  | 119.9(8)  | C46-C45-C35   | 121.4(8) |
| C45-C50-C49  | 120.7(8)  | C45-C50-H50   | 119.6    |
| C49-C50-H50  | 119.6     | C42-C43-C44   | 119.4(9) |
| C42-C43-H43  | 120.3     | C44-C43-H43   | 120.3    |
| C43-C42-C41  | 120.5(10) | C43-C42-H42   | 119.8    |
| C41-C42-H42  | 119.8     | C48-C47-C46   | 121.1(9) |

|             |          |             |          |
|-------------|----------|-------------|----------|
| C48-C47-H47 | 119.5    | C46-C47-H47 | 119.5    |
| C47-C48-C49 | 119.6(9) | C47-C48-H48 | 120.2    |
| C49-C48-H48 | 120.2    | C48-C49-C50 | 119.8(9) |
| C48-C49-H49 | 120.1    | C50-C49-H49 | 120.1    |

**Table S24.** Torsion angles (°) for **6**.

|                 |           |                 |           |
|-----------------|-----------|-----------------|-----------|
| C17-P1-C1-C11   | 32.5(7)   | C4-P1-C1-C11    | 136.1(6)  |
| Rh1-P1-C1-C11   | -97.6(6)  | C17-P1-C1-C2    | -99.8(6)  |
| C4-P1-C1-C2     | 3.8(6)    | Rh1-P1-C1-C2    | 130.2(5)  |
| C11-C1-C2-C3    | -164.2(7) | P1-C1-C2-C3     | -32.6(7)  |
| C1-C2-C3-C4     | 52.9(8)   | C2-C3-C4-C5     | -177.5(6) |
| C2-C3-C4-P1     | -48.2(7)  | C17-P1-C4-C5    | -96.9(6)  |
| C1-P1-C4-C5     | 152.8(6)  | Rh1-P1-C4-C5    | 28.9(7)   |
| C17-P1-C4-C3    | 135.7(5)  | C1-P1-C4-C3     | 25.4(5)   |
| Rh1-P1-C4-C3    | -98.5(5)  | C3-C4-C5-C6     | 69.4(9)   |
| P1-C4-C5-C6     | -52.7(8)  | C3-C4-C5-C10    | -112.3(8) |
| P1-C4-C5-C10    | 125.6(6)  | C10-C5-C6-C7    | 0.2(11)   |
| C4-C5-C6-C7     | 178.5(7)  | C5-C6-C7-C8     | 0.7(11)   |
| C6-C7-C8-C9     | -0.1(12)  | C7-C8-C9-C10    | -1.3(12)  |
| C8-C9-C10-C5    | 2.2(11)   | C6-C5-C10-C9    | -1.6(11)  |
| C4-C5-C10-C9    | -179.9(6) | C2-C1-C11-C16   | 4.2(11)   |
| P1-C1-C11-C16   | -122.9(7) | C2-C1-C11-C12   | -174.4(7) |
| P1-C1-C11-C12   | 58.5(9)   | C16-C11-C12-C13 | 1.0(11)   |
| C1-C11-C12-C13  | 179.7(7)  | C11-C12-C13-C14 | -1.2(12)  |
| C12-C13-C14-C15 | 0.9(12)   | C13-C14-C15-C16 | -0.5(12)  |
| C12-C11-C16-C15 | -0.6(12)  | C1-C11-C16-C15  | -179.3(7) |
| C14-C15-C16-C11 | 0.4(12)   | C4-P1-C17-C18   | 151.7(5)  |
| C1-P1-C17-C18   | -110.9(6) | Rh1-P1-C17-C18  | 21.3(6)   |
| P1-C17-C18-P2   | -30.1(7)  | C22-P2-C18-C17  | 162.2(5)  |
| C19-P2-C18-C17  | -100.2(5) | Rh1-P2-C18-C17  | 29.1(6)   |
| C18-P2-C19-C29  | 23.3(7)   | C22-P2-C19-C29  | 127.6(6)  |
| Rh1-P2-C19-C29  | -105.7(5) | C18-P2-C19-C20  | -109.6(5) |
| C22-P2-C19-C20  | -5.3(5)   | Rh1-P2-C19-C20  | 121.4(5)  |
| C29-C19-C20-C21 | -152.9(7) | P2-C19-C20-C21  | -22.6(7)  |
| C19-C20-C21-C22 | 48.3(8)   | C20-C21-C22-C23 | -178.1(6) |
| C20-C21-C22-P2  | -50.4(6)  | C18-P2-C22-C23  | -86.9(6)  |
| C19-P2-C22-C23  | 161.0(6)  | Rh1-P2-C22-C23  | 40.8(7)   |
| C18-P2-C22-C21  | 143.8(5)  | C19-P2-C22-C21  | 31.7(5)   |
| Rh1-P2-C22-C21  | -88.5(5)  | C21-C22-C23-C24 | 51.2(10)  |
| P2-C22-C23-C24  | -70.5(8)  | C21-C22-C23-C28 | -129.5(8) |

|                 |           |                 |           |
|-----------------|-----------|-----------------|-----------|
| P2-C22-C23-C28  | 108.9(7)  | C28-C23-C24-C25 | 1.7(11)   |
| C22-C23-C24-C25 | -178.9(7) | C23-C24-C25-C26 | -1.0(12)  |
| C24-C25-C26-C27 | 0.4(12)   | C25-C26-C27-C28 | -0.5(12)  |
| C26-C27-C28-C23 | 1.2(12)   | C24-C23-C28-C27 | -1.8(11)  |
| C22-C23-C28-C27 | 178.8(7)  | C20-C19-C29-C30 | -150.6(7) |
| P2-C19-C29-C30  | 82.7(8)   | C20-C19-C29-C34 | 32.5(10)  |
| P2-C19-C29-C34  | -94.2(7)  | C34-C29-C30-C31 | -1.2(10)  |
| C19-C29-C30-C31 | -178.3(7) | C29-C30-C31-C32 | -0.1(11)  |
| C30-C31-C32-C33 | 1.0(11)   | C31-C32-C33-C34 | -0.6(11)  |
| C32-C33-C34-C29 | -0.7(11)  | C30-C29-C34-C33 | 1.6(10)   |
| C19-C29-C34-C33 | 178.6(7)  | C51-P3-C35-C45  | -98.4(6)  |
| C38-P3-C35-C45  | 152.8(6)  | Rh2-P3-C35-C45  | 26.0(7)   |
| C51-P3-C35-C36  | 131.7(5)  | C38-P3-C35-C36  | 22.9(5)   |
| Rh2-P3-C35-C36  | -103.9(5) | C45-C35-C36-C37 | -174.9(6) |
| P3-C35-C36-C37  | -45.7(7)  | C35-C36-C37-C38 | 51.9(8)   |
| C36-C37-C38-C39 | -161.8(7) | C36-C37-C38-P3  | -32.2(7)  |
| C51-P3-C38-C39  | 31.8(6)   | C35-P3-C38-C39  | 135.9(6)  |
| Rh2-P3-C38-C39  | -94.7(6)  | C51-P3-C38-C37  | -99.3(5)  |
| C35-P3-C38-C37  | 4.8(5)    | Rh2-P3-C38-C37  | 134.2(4)  |
| C37-C38-C39-C40 | -139.2(8) | P3-C38-C39-C40  | 95.6(8)   |
| C37-C38-C39-C44 | 40.3(11)  | P3-C38-C39-C44  | -85.0(8)  |
| C44-C39-C40-C41 | 1.1(13)   | C38-C39-C40-C41 | -179.4(8) |
| C40-C39-C44-C43 | -0.9(12)  | C38-C39-C44-C43 | 179.7(7)  |
| C35-P3-C51-C52  | 171.6(5)  | C38-P3-C51-C52  | -91.2(6)  |
| Rh2-P3-C51-C52  | 39.9(6)   | P3-C51-C52-P4   | -37.6(6)  |
| C53-P4-C52-C51  | -105.4(6) | C56-P4-C52-C51  | 158.3(5)  |
| Rh2-P4-C52-C51  | 22.8(6)   | C52-P4-C53-C63  | 50.4(6)   |
| C56-P4-C53-C63  | 152.9(6)  | Rh2-P4-C53-C63  | -74.8(6)  |
| C52-P4-C53-C54  | -80.4(6)  | C56-P4-C53-C54  | 22.2(5)   |
| Rh2-P4-C53-C54  | 154.5(4)  | C54-C53-C63-C64 | 8.1(11)   |
| P4-C53-C63-C64  | -115.6(7) | C54-C53-C63-C68 | -172.0(7) |
| P4-C53-C63-C68  | 64.3(8)   | C64-C63-C68-C67 | -1.5(11)  |
| C53-C63-C68-C67 | 178.6(7)  | C63-C68-C67-C66 | 1.5(13)   |
| C68-C67-C66-C65 | -1.2(13)  | C67-C66-C65-C64 | 1.0(13)   |
| C68-C63-C64-C65 | 1.3(11)   | C53-C63-C64-C65 | -178.8(7) |
| C66-C65-C64-C63 | -1.1(12)  | C63-C53-C54-C55 | -172.6(6) |
| P4-C53-C54-C55  | -44.2(7)  | C53-C54-C55-C56 | 50.1(8)   |
| C54-C55-C56-C57 | -162.3(6) | C54-C55-C56-P4  | -31.3(7)  |
| C52-P4-C56-C57  | -121.8(6) | C53-P4-C56-C57  | 133.2(6)  |
| Rh2-P4-C56-C57  | 6.2(7)    | C52-P4-C56-C55  | 109.9(5)  |
| C53-P4-C56-C55  | 4.9(5)    | Rh2-P4-C56-C55  | -122.1(5) |

|                 |           |                 |           |
|-----------------|-----------|-----------------|-----------|
| C55-C56-C57-C62 | -121.8(8) | P4-C56-C57-C62  | 113.6(7)  |
| C55-C56-C57-C58 | 54.5(10)  | P4-C56-C57-C58  | -70.2(9)  |
| C58-C57-C62-C61 | -0.8(12)  | C56-C57-C62-C61 | 175.6(7)  |
| C57-C62-C61-C60 | 0.6(12)   | C62-C61-C60-C59 | -1.4(12)  |
| C61-C60-C59-C58 | 2.5(13)   | C60-C59-C58-C57 | -2.7(13)  |
| C62-C57-C58-C59 | 1.9(12)   | C56-C57-C58-C59 | -174.5(8) |
| C39-C40-C41-C42 | -0.5(16)  | C47-C46-C45-C50 | 0.6(12)   |
| C47-C46-C45-C35 | 179.9(7)  | C36-C35-C45-C50 | -138.3(8) |
| P3-C35-C45-C50  | 98.5(8)   | C36-C35-C45-C46 | 42.3(10)  |
| P3-C35-C45-C46  | -80.8(9)  | C46-C45-C50-C49 | -0.5(12)  |
| C35-C45-C50-C49 | -179.9(7) | C39-C44-C43-C42 | 0.0(13)   |
| C44-C43-C42-C41 | 0.6(14)   | C40-C41-C42-C43 | -0.4(16)  |
| C45-C46-C47-C48 | -0.1(14)  | C46-C47-C48-C49 | -0.6(14)  |
| C47-C48-C49-C50 | 0.7(13)   | C45-C50-C49-C48 | -0.1(13)  |

**Table S25.** Anisotropic atomic displacement parameters ( $\text{\AA}^2$ ) for **6**. The anisotropic atomic displacement factor exponent takes the form:  $-2\pi^2[h^2 a^{*2} U_{11} + \dots + 2 h k a^* b^* U_{12}]$ .

|     | $U_{11}$   | $U_{22}$   | $U_{33}$   | $U_{23}$   | $U_{13}$    | $U_{12}$    |
|-----|------------|------------|------------|------------|-------------|-------------|
| Rh1 | 0.0203(3)  | 0.0113(3)  | 0.0127(3)  | -0.0008(2) | 0.0000(3)   | 0.0004(3)   |
| Rh2 | 0.0186(3)  | 0.0110(3)  | 0.0129(3)  | -0.0014(2) | -0.0003(3)  | -0.0003(3)  |
| P1  | 0.0195(11) | 0.0141(10) | 0.0135(10) | -0.0005(9) | 0.0007(9)   | -0.0003(9)  |
| P2  | 0.0149(9)  | 0.0126(9)  | 0.0139(9)  | -0.0014(7) | -0.0013(11) | -0.0008(10) |
| P3  | 0.0185(11) | 0.0124(9)  | 0.0150(9)  | -0.0007(7) | -0.0003(11) | 0.0002(11)  |
| P4  | 0.0213(11) | 0.0143(9)  | 0.0126(9)  | -0.0005(9) | -0.0022(10) | -0.0034(10) |
| C1  | 0.021(5)   | 0.021(4)   | 0.024(5)   | 0.001(4)   | -0.003(4)   | 0.001(4)    |
| C2  | 0.036(6)   | 0.015(4)   | 0.040(5)   | 0.006(4)   | -0.013(5)   | -0.003(4)   |
| C3  | 0.023(5)   | 0.012(4)   | 0.040(5)   | 0.002(4)   | -0.010(4)   | -0.002(4)   |
| C4  | 0.021(5)   | 0.022(4)   | 0.018(4)   | 0.001(3)   | -0.002(4)   | -0.012(4)   |
| C5  | 0.022(5)   | 0.007(4)   | 0.025(5)   | -0.002(3)  | -0.003(4)   | -0.008(3)   |
| C6  | 0.016(4)   | 0.022(4)   | 0.028(5)   | -0.003(4)  | -0.001(4)   | 0.002(3)    |
| C7  | 0.036(5)   | 0.026(5)   | 0.024(5)   | 0.001(4)   | -0.012(4)   | 0.000(4)    |
| C8  | 0.014(4)   | 0.021(4)   | 0.047(6)   | 0.006(4)   | -0.009(4)   | 0.004(4)    |
| C9  | 0.017(5)   | 0.013(4)   | 0.053(6)   | 0.005(4)   | 0.007(5)    | 0.000(4)    |
| C10 | 0.025(5)   | 0.014(4)   | 0.026(5)   | -0.002(4)  | 0.004(4)    | -0.002(4)   |
| C11 | 0.026(5)   | 0.017(4)   | 0.018(4)   | 0.000(3)   | 0.001(4)    | -0.002(4)   |
| C12 | 0.023(4)   | 0.021(4)   | 0.025(4)   | 0.003(4)   | -0.006(4)   | 0.002(4)    |
| C13 | 0.024(5)   | 0.020(4)   | 0.041(5)   | 0.002(4)   | -0.005(4)   | -0.005(4)   |
| C14 | 0.027(5)   | 0.032(5)   | 0.030(5)   | -0.008(4)  | -0.012(4)   | 0.003(4)    |
| C15 | 0.038(5)   | 0.032(5)   | 0.016(4)   | 0.001(4)   | -0.005(4)   | 0.010(4)    |
| C16 | 0.020(5)   | 0.030(5)   | 0.018(4)   | 0.003(4)   | 0.002(4)    | 0.001(4)    |

|     | $U_{11}$ | $U_{22}$ | $U_{33}$ | $U_{23}$  | $U_{13}$  | $U_{12}$  |
|-----|----------|----------|----------|-----------|-----------|-----------|
| C17 | 0.020(4) | 0.024(4) | 0.017(4) | -0.002(3) | 0.002(4)  | 0.002(4)  |
| C18 | 0.023(4) | 0.013(4) | 0.019(4) | -0.005(3) | -0.008(4) | 0.005(4)  |
| C19 | 0.024(5) | 0.012(4) | 0.015(4) | -0.003(3) | -0.001(4) | 0.003(4)  |
| C20 | 0.026(5) | 0.018(4) | 0.029(5) | 0.000(4)  | -0.002(4) | 0.000(4)  |
| C21 | 0.022(5) | 0.012(4) | 0.029(5) | 0.005(4)  | -0.004(4) | 0.001(4)  |
| C22 | 0.015(4) | 0.021(4) | 0.013(4) | -0.001(3) | 0.003(4)  | -0.003(4) |
| C23 | 0.015(4) | 0.012(4) | 0.025(4) | 0.003(3)  | 0.001(4)  | -0.005(3) |
| C24 | 0.023(5) | 0.020(4) | 0.034(5) | -0.003(4) | 0.005(4)  | 0.000(4)  |
| C25 | 0.037(5) | 0.027(4) | 0.035(5) | -0.002(4) | 0.015(6)  | 0.006(6)  |
| C26 | 0.023(5) | 0.022(5) | 0.050(6) | 0.011(4)  | 0.005(5)  | 0.012(4)  |
| C27 | 0.023(5) | 0.030(5) | 0.032(5) | 0.009(4)  | -0.005(4) | 0.007(4)  |
| C28 | 0.027(5) | 0.023(5) | 0.020(5) | 0.000(4)  | 0.002(4)  | -0.004(4) |
| C29 | 0.011(5) | 0.019(4) | 0.014(4) | 0.003(3)  | -0.001(3) | 0.004(3)  |
| C30 | 0.020(4) | 0.013(4) | 0.023(4) | -0.002(4) | -0.005(4) | 0.002(4)  |
| C31 | 0.017(4) | 0.019(4) | 0.033(5) | 0.005(4)  | 0.000(4)  | -0.006(4) |
| C32 | 0.019(5) | 0.024(4) | 0.027(5) | 0.006(4)  | 0.005(4)  | 0.011(4)  |
| C33 | 0.029(5) | 0.019(4) | 0.017(4) | -0.006(4) | -0.002(4) | 0.008(4)  |
| C34 | 0.021(5) | 0.013(4) | 0.021(4) | -0.001(3) | -0.005(4) | 0.002(3)  |
| C35 | 0.019(4) | 0.014(4) | 0.025(5) | -0.005(4) | -0.007(4) | 0.007(4)  |
| C46 | 0.028(5) | 0.046(6) | 0.040(6) | -0.014(5) | -0.013(5) | 0.012(5)  |
| C36 | 0.038(6) | 0.014(4) | 0.032(5) | 0.004(4)  | -0.011(5) | -0.001(4) |
| C37 | 0.034(5) | 0.012(4) | 0.024(5) | 0.006(3)  | -0.001(4) | -0.001(4) |
| C38 | 0.018(4) | 0.017(4) | 0.020(4) | 0.000(3)  | -0.002(4) | 0.000(4)  |
| C39 | 0.028(5) | 0.013(4) | 0.027(4) | 0.002(3)  | -0.008(5) | -0.006(4) |
| C40 | 0.034(5) | 0.032(5) | 0.051(7) | -0.007(5) | -0.015(5) | 0.006(4)  |
| C44 | 0.043(5) | 0.023(4) | 0.023(4) | -0.002(3) | -0.008(5) | -0.011(5) |
| C51 | 0.021(4) | 0.017(4) | 0.015(4) | -0.004(3) | 0.001(4)  | -0.004(4) |
| C52 | 0.021(4) | 0.019(4) | 0.021(4) | -0.005(3) | 0.000(4)  | -0.002(4) |
| C53 | 0.027(5) | 0.024(4) | 0.012(4) | -0.006(4) | -0.004(4) | -0.005(4) |
| C63 | 0.028(5) | 0.019(4) | 0.022(5) | -0.002(4) | 0.005(4)  | -0.012(4) |
| C68 | 0.020(5) | 0.030(5) | 0.044(6) | 0.006(5)  | 0.007(4)  | -0.003(4) |
| C67 | 0.033(5) | 0.035(5) | 0.064(6) | 0.015(5)  | -0.005(7) | -0.004(5) |
| C66 | 0.026(5) | 0.055(7) | 0.066(8) | -0.018(6) | 0.006(6)  | -0.012(5) |
| C65 | 0.025(5) | 0.073(7) | 0.036(5) | -0.024(5) | 0.008(5)  | -0.021(6) |
| C64 | 0.027(5) | 0.043(5) | 0.026(5) | -0.007(4) | -0.004(4) | -0.016(4) |
| C54 | 0.035(5) | 0.023(4) | 0.019(4) | 0.003(4)  | -0.001(4) | -0.007(4) |
| C55 | 0.035(5) | 0.019(5) | 0.026(5) | 0.002(4)  | -0.007(4) | -0.001(4) |
| C56 | 0.034(5) | 0.011(4) | 0.023(4) | 0.005(4)  | -0.005(4) | -0.001(4) |
| C57 | 0.028(5) | 0.018(4) | 0.020(4) | 0.001(4)  | -0.002(4) | 0.004(4)  |
| C62 | 0.035(5) | 0.021(4) | 0.029(5) | 0.000(4)  | -0.010(5) | 0.003(4)  |

|     | $U_{11}$ | $U_{22}$ | $U_{33}$  | $U_{23}$  | $U_{13}$  | $U_{12}$  |
|-----|----------|----------|-----------|-----------|-----------|-----------|
| C61 | 0.022(5) | 0.026(5) | 0.048(6)  | 0.007(4)  | -0.004(5) | 0.008(4)  |
| C60 | 0.030(5) | 0.034(5) | 0.033(5)  | 0.009(4)  | 0.005(5)  | 0.015(4)  |
| C59 | 0.038(6) | 0.054(6) | 0.026(5)  | -0.008(5) | -0.006(5) | 0.023(5)  |
| C58 | 0.025(5) | 0.054(6) | 0.025(4)  | -0.007(5) | -0.006(4) | 0.005(5)  |
| C41 | 0.049(7) | 0.039(6) | 0.095(10) | -0.005(6) | -0.042(8) | 0.016(6)  |
| C45 | 0.028(5) | 0.015(4) | 0.034(5)  | -0.005(4) | -0.010(5) | 0.006(4)  |
| C50 | 0.035(6) | 0.025(5) | 0.035(6)  | 0.002(4)  | -0.006(5) | 0.002(4)  |
| C43 | 0.064(7) | 0.020(5) | 0.036(6)  | -0.001(4) | -0.018(6) | -0.014(5) |
| C42 | 0.071(8) | 0.029(6) | 0.069(8)  | 0.008(6)  | -0.041(7) | -0.020(6) |
| C47 | 0.055(7) | 0.035(6) | 0.050(7)  | -0.016(5) | -0.027(6) | 0.013(5)  |
| C48 | 0.041(7) | 0.026(5) | 0.064(7)  | 0.000(5)  | -0.032(6) | 0.003(5)  |
| C49 | 0.031(6) | 0.029(5) | 0.068(8)  | 0.011(5)  | -0.014(6) | -0.006(4) |

**Table S26.** Hydrogen atomic coordinates and isotropic atomic displacement parameters ( $\text{\AA}^2$ ) for **6**.

|     | $x/a$   | $y/b$  | $z/c$   | $U(\text{eq})$ |
|-----|---------|--------|---------|----------------|
| H1  | 0.0787  | 0.1822 | 0.0410  | 0.026          |
| H2A | 0.2047  | 0.2252 | -0.0483 | 0.037          |
| H2B | 0.1484  | 0.2779 | -0.0050 | 0.037          |
| H3A | 0.2585  | 0.2370 | 0.0664  | 0.03           |
| H3B | 0.3299  | 0.2623 | 0.0164  | 0.03           |
| H4  | 0.3388  | 0.1402 | -0.0168 | 0.024          |
| H6  | 0.3345  | 0.1312 | 0.1307  | 0.026          |
| H7  | 0.4741  | 0.0992 | 0.1836  | 0.034          |
| H8  | 0.6315  | 0.0777 | 0.1429  | 0.032          |
| H9  | 0.6476  | 0.0888 | 0.0485  | 0.033          |
| H10 | 0.5068  | 0.1159 | -0.0051 | 0.026          |
| H12 | -0.0320 | 0.0674 | 0.0186  | 0.027          |
| H13 | -0.1615 | 0.0311 | -0.0404 | 0.034          |
| H14 | -0.1788 | 0.0880 | -0.1260 | 0.036          |
| H15 | -0.0625 | 0.1779 | -0.1523 | 0.034          |
| H16 | 0.0673  | 0.2129 | -0.0938 | 0.027          |



|      | <b>x/a</b> | <b>y/b</b> | <b>z/c</b> | <b>U(eq)</b> |
|------|------------|------------|------------|--------------|
| H17A | 0.1844     | 0.0407     | -0.0595    | 0.024        |
| H17B | 0.2873     | 0.0111     | -0.0324    | 0.024        |
| H18A | 0.1959     | -0.0941    | -0.0285    | 0.022        |
| H18B | 0.0902     | -0.0509    | -0.0232    | 0.022        |
| H19  | 0.2997     | -0.1102    | 0.1174     | 0.02         |
| H20A | 0.2132     | -0.2401    | 0.0733     | 0.029        |
| H20B | 0.2520     | -0.2253    | 0.1344     | 0.029        |
| H21A | 0.0647     | -0.2275    | 0.1258     | 0.025        |
| H21B | 0.1072     | -0.1542    | 0.1550     | 0.025        |
| H22  | 0.0627     | -0.1677    | 0.0412     | 0.02         |
| H24  | -0.0230    | -0.0580    | 0.1565     | 0.031        |
| H25  | -0.1890    | -0.0150    | 0.1649     | 0.04         |
| H26  | -0.3068    | -0.0331    | 0.0957     | 0.038        |
| H27  | -0.2576    | -0.0973    | 0.0172     | 0.034        |
| H28  | -0.0936    | -0.1404    | 0.0073     | 0.028        |
| H30  | 0.4286     | -0.0474    | 0.0700     | 0.022        |
| H31  | 0.5582     | -0.0514    | 0.0065     | 0.027        |
| H32  | 0.5630     | -0.1449    | -0.0593    | 0.028        |
| H33  | 0.4336     | -0.2320    | -0.0621    | 0.026        |
| H34  | 0.3023     | -0.2276    | 0.0008     | 0.022        |
| H35  | 0.0503     | 0.2871     | 0.2658     | 0.023        |
| H46  | 0.0503     | 0.2275     | 0.1260     | 0.046        |
| H36A | 0.1684     | 0.2990     | 0.1682     | 0.033        |
| H36B | 0.1127     | 0.3659     | 0.1993     | 0.033        |
| H37A | 0.2165     | 0.3509     | 0.2759     | 0.028        |
| H37B | 0.2904     | 0.3552     | 0.2239     | 0.028        |
| H38  | 0.3176     | 0.2327     | 0.2223     | 0.022        |
| H40  | 0.4415     | 0.1676     | 0.2673     | 0.047        |
| H44  | 0.2721     | 0.3076     | 0.3557     | 0.035        |
| H51A | 0.1416     | 0.2149     | 0.3478     | 0.021        |
| H51B | 0.0481     | 0.1653     | 0.3276     | 0.021        |
| H52A | 0.1366     | 0.0828     | 0.3791     | 0.024        |
| H52B | 0.2442     | 0.1149     | 0.3598     | 0.024        |
| H53  | 0.0707     | -0.0690    | 0.2792     | 0.025        |
| H68  | -0.0469    | 0.0375     | 0.2491     | 0.038        |
| H67  | -0.2062    | 0.0860     | 0.2673     | 0.053        |
| H66  | -0.2737    | 0.0787     | 0.3545     | 0.059        |
| H65  | -0.1856    | 0.0183     | 0.4229     | 0.053        |
| H64  | -0.0256    | -0.0315    | 0.4052     | 0.038        |
| H54A | 0.1365     | -0.0582    | 0.3901     | 0.031        |

|      | x/a     | y/b     | z/c    | U(eq) |
|------|---------|---------|--------|-------|
| H54B | 0.0938  | -0.1310 | 0.3603 | 0.031 |
| H55A | 0.2343  | -0.1359 | 0.3021 | 0.032 |
| H55B | 0.2792  | -0.1256 | 0.3625 | 0.032 |
| H56  | 0.3136  | -0.0048 | 0.3504 | 0.027 |
| H62  | 0.4767  | 0.0179  | 0.3257 | 0.034 |
| H61  | 0.6193  | -0.0039 | 0.2721 | 0.038 |
| H60  | 0.6053  | -0.0711 | 0.1913 | 0.039 |
| H59  | 0.4490  | -0.1214 | 0.1674 | 0.047 |
| H58  | 0.3060  | -0.0965 | 0.2194 | 0.042 |
| H41  | 0.5479  | 0.1505  | 0.3423 | 0.074 |
| H50  | -0.1143 | 0.2436  | 0.2647 | 0.038 |
| H43  | 0.3779  | 0.2914  | 0.4298 | 0.048 |
| H42  | 0.5148  | 0.2124  | 0.4234 | 0.068 |
| H47  | -0.0949 | 0.1923  | 0.0789 | 0.056 |
| H48  | -0.2493 | 0.1832  | 0.1231 | 0.053 |
| H49  | -0.2596 | 0.2077  | 0.2166 | 0.051 |

## 7. References

---

- (1) Field, L. D.; Messerie, B. A.; Rehr, M.; Soler, L. P.; Hambley, T. W. *Organometallics* **2003**, *22*, 2387–2395.
- (2) Mochida, K.; Kimijima, K.; Wakasa, M.; Hayashi, H. *J. Organomet. Chem.* **1994**, *465*, 101–107.
- (3) Grande, J. B.; Thompson, D. B.; Gonzaga, F.; Brook, M. A. *Chem. Commun.* **2010**, *46*, 4988–4990.
